# Supplementary material for: Pathogenic Effects and Potential Regulatory Mechanisms of Tea Polyphenols on Obesity
Source: Hindawi journal article supplement (doi:10.1155/2019/2579734), 2019-06-11
Supplement: f1 [file 2579734.f1.pdf]

| miRNA id         | Count (DUI4) | Count (DA3) | TPM (DUI4) | TPM (DA3) | log2 Ratio(DA3/DUI4) | Up-Down-Regulation (DA3/DUI4) | P-value   | FDR       |
|------------------|--------------|-------------|------------|-----------|----------------------|-------------------------------|-----------|-----------|
| novel mir626     | 0            | 2987        | 0.001      | 148.11    | 17.17630953          | Up                            | 0         | 0         |
| novel mir18      | 0            | 514         | 0.001      | 25.49     | 14.63764375          | Up                            | 2.15E-201 | 1.30E-200 |
| mmu-miR-138-2-3p | 0            | 455         | 0.001      | 22.56     | 14.46147945          | Up                            | 2.27E-178 | 1.29E-177 |
| novel mir22      | 0            | 414         | 0.001      | 20.53     | 14.32544601          | Up                            | 2.26E-162 | 1.24E-161 |
| mmu-miR-3473e    | 0            | 390         | 0.001      | 19.34     | 14.23930017          | Up                            | 5.25E-153 | 2.80E-152 |
| mmu-miR-5114     | 0            | 348         | 0.001      | 17.26     | 14.07514484          | Up                            | 1.29E-136 | 6.58E-136 |
| novel mir750     | 0            | 202         | 0.001      | 10.02     | 13.29059489          | Up                            | 1.21E-79  | 3.98E-79  |
| novel mir426     | 0            | 192         | 0.001      | 9.52      | 13.21674586          | Up                            | 9.69E-76  | 2.98E-75  |
| mmu-miR-138-1-3p | 0            | 179         | 0.001      | 8.88      | 13.11634396          | Up                            | 1.15E-70  | 3.31E-70  |
| novel mir557     | 0            | 178         | 0.001      | 8.83      | 13.10819772          | Up                            | 2.82E-70  | 8.09E-70  |
| novel mir364     | 0            | 157         | 0.001      | 7.78      | 12.92555444          | Up                            | 4.41E-62  | 1.14E-61  |
| novel mir622     | 0            | 154         | 0.001      | 7.64      | 12.89935692          | Up                            | 6.53E-61  | 1.67E-60  |
| novel mir683     | 0            | 151         | 0.001      | 7.49      | 12.87075             | Up                            | 9.68E-60  | 2.44E-59  |
| novel mir248     | 0            | 147         | 0.001      | 7.29      | 12.8317031           | Up                            | 3.52E-58  | 8.65E-58  |
| novel mir133     | 0            | 133         | 0.001      | 6.59      | 12.68606275          | Up                            | 1.02E-52  | 2.34E-52  |
| novel mir529     | 0            | 132         | 0.001      | 6.55      | 12.67727919          | Up                            | 2.51E-52  | 5.73E-52  |
| novel mir54      | 0            | 132         | 0.001      | 6.55      | 12.67727919          | Up                            | 2.51E-52  | 5.72E-52  |
| novel mir632     | 0            | 124         | 0.001      | 6.15      | 12.5863707           | Up                            | 3.33E-49  | 7.32E-49  |
| mmu-miR-7065-5p  | 0            | 122         | 0.001      | 6.05      | 12.56271943          | Up                            | 2.01E-48  | 4.39E-48  |
| novel mir543     | 0            | 122         | 0.001      | 6.05      | 12.56271943          | Up                            | 2.01E-48  | 4.38E-48  |
| novel mir742     | 0            | 121         | 0.001      | 6         | 12.55074679          | Up                            | 4.93E-48  | 1.06E-47  |
| novel mir519     | 0            | 118         | 0.001      | 5.85      | 12.51422091          | Up                            | 7.30E-47  | 1.56E-46  |
| novel mir629     | 0            | 116         | 0.001      | 5.75      | 12.48934624          | Up                            | 4.40E-46  | 9.35E-46  |
| novel mir760     | 0            | 115         | 0.001      | 5.7       | 12.4767462           | Up                            | 1.08E-45  | 2.28E-45  |
| novel mir424     | 0            | 112         | 0.001      | 5.55      | 12.43827206          | Up                            | 1.60E-44  | 3.34E-44  |
| novel mir66      | 0            | 112         | 0.001      | 5.55      | 12.43827206          | Up                            | 1.60E-44  | 3.34E-44  |
| novel mir153     | 0            | 108         | 0.001      | 5.36      | 12.38801729          | Up                            | 5.83E-43  | 1.20E-42  |
| mmu-miR-700-3p   | 0            | 108         | 0.001      | 5.36      | 12.38801729          | Up                            | 5.83E-43  | 1.20E-42  |
| novel mir496     | 0            | 106         | 0.001      | 5.26      | 12.36084708          | Up                            | 3.52E-42  | 7.21E-42  |
| novel mir381     | 0            | 104         | 0.001      | 5.16      | 12.33315535          | Up                            | 2.12E-41  | 4.32E-41  |
| novel mir643     | 0            | 102         | 0.001      | 5.06      | 12.30492167          | Up                            | 1.28E-40  | 2.58E-40  |
| novel mir185     | 0            | 98          | 0.001      | 4.86      | 12.2467406           | Up                            | 4.66E-39  | 9.25E-39  |
| novel mir336     | 0            | 98          | 0.001      | 4.86      | 12.2467406           | Up                            | 4.66E-39  | 9.23E-39  |

|                 |   |    |       |      |             |    |          |          |
|-----------------|---|----|-------|------|-------------|----|----------|----------|
| novel mir720    | 0 | 92 | 0.001 | 4.56 | 12.15481811 | Up | 1.02E-36 | 2.00E-36 |
| novel mir292    | 0 | 92 | 0.001 | 4.56 | 12.15481811 | Up | 1.02E-36 | 1.99E-36 |
| novel mir548    | 0 | 87 | 0.001 | 4.31 | 12.07347215 | Up | 9.13E-35 | 1.75E-34 |
| novel mir587    | 0 | 86 | 0.001 | 4.26 | 12.05663772 | Up | 2.24E-34 | 4.30E-34 |
| novel mir653    | 0 | 85 | 0.001 | 4.21 | 12.03960452 | Up | 5.51E-34 | 1.05E-33 |
| novel mir635    | 0 | 85 | 0.001 | 4.21 | 12.03960452 | Up | 5.51E-34 | 1.05E-33 |
| novel mir673    | 0 | 85 | 0.001 | 4.21 | 12.03960452 | Up | 5.51E-34 | 1.05E-33 |
| novel mir392    | 0 | 81 | 0.001 | 4.02 | 11.97297979 | Up | 2.00E-32 | 3.76E-32 |
| mmu-miR-3086-5p | 0 | 73 | 0.001 | 3.62 | 11.82177398 | Up | 2.65E-29 | 4.91E-29 |
| novel mir347    | 0 | 72 | 0.001 | 3.57 | 11.80170836 | Up | 6.52E-29 | 1.19E-28 |
| novel mir676    | 0 | 72 | 0.001 | 3.57 | 11.80170836 | Up | 6.52E-29 | 1.19E-28 |
| novel mir269    | 0 | 72 | 0.001 | 3.57 | 11.80170836 | Up | 6.52E-29 | 1.19E-28 |
| novel mir397    | 0 | 69 | 0.001 | 3.42 | 11.73978061 | Up | 9.66E-28 | 1.75E-27 |
| mmu-miR-141-5p  | 0 | 69 | 0.001 | 3.42 | 11.73978061 | Up | 9.66E-28 | 1.74E-27 |
| novel mir211    | 0 | 68 | 0.001 | 3.37 | 11.71853288 | Up | 2.37E-27 | 4.26E-27 |
| novel mir461    | 0 | 67 | 0.001 | 3.32 | 11.69696753 | Up | 5.82E-27 | 1.04E-26 |
| novel mir112    | 0 | 64 | 0.001 | 3.17 | 11.63026713 | Up | 8.63E-26 | 1.53E-25 |
| novel mir525    | 0 | 64 | 0.001 | 3.17 | 11.63026713 | Up | 8.63E-26 | 1.53E-25 |
| novel mir152    | 0 | 64 | 0.001 | 3.17 | 11.63026713 | Up | 8.63E-26 | 1.53E-25 |
| mmu-miR-8114    | 0 | 62 | 0.001 | 3.07 | 11.58402294 | Up | 5.21E-25 | 9.17E-25 |
| novel mir442    | 0 | 61 | 0.001 | 3.02 | 11.56033283 | Up | 1.28E-24 | 2.24E-24 |
| novel mir119    | 0 | 61 | 0.001 | 3.02 | 11.56033283 | Up | 1.28E-24 | 2.24E-24 |
| novel mir146    | 0 | 60 | 0.001 | 2.98 | 11.54109662 | Up | 3.14E-24 | 5.49E-24 |
| novel mir449    | 0 | 59 | 0.001 | 2.93 | 11.51668495 | Up | 7.71E-24 | 1.34E-23 |
| novel mir706    | 0 | 59 | 0.001 | 2.93 | 11.51668495 | Up | 7.71E-24 | 1.34E-23 |
| mmu-miR-6912-5p | 0 | 59 | 0.001 | 2.93 | 11.51668495 | Up | 7.71E-24 | 1.34E-23 |
| novel mir711    | 0 | 59 | 0.001 | 2.93 | 11.51668495 | Up | 7.71E-24 | 1.33E-23 |
| novel mir404    | 0 | 58 | 0.001 | 2.88 | 11.4918531  | Up | 1.89E-23 | 3.27E-23 |
| novel mir286    | 0 | 57 | 0.001 | 2.83 | 11.46658634 | Up | 4.65E-23 | 7.98E-23 |
| novel mir301    | 0 | 57 | 0.001 | 2.83 | 11.46658634 | Up | 4.65E-23 | 7.97E-23 |
| mmu-miR-7024-5p | 0 | 56 | 0.001 | 2.78 | 11.44086917 | Up | 1.14E-22 | 1.95E-22 |
| mmu-miR-5119    | 0 | 56 | 0.001 | 2.78 | 11.44086917 | Up | 1.14E-22 | 1.95E-22 |
| novel mir470    | 0 | 54 | 0.001 | 2.68 | 11.38801729 | Up | 6.89E-22 | 1.17E-21 |
| novel mir764    | 0 | 54 | 0.001 | 2.68 | 11.38801729 | Up | 6.89E-22 | 1.17E-21 |
| novel mir120    | 0 | 52 | 0.001 | 2.58 | 11.33315535 | Up | 4.16E-21 | 7.01E-21 |
| novel mir500    | 0 | 51 | 0.001 | 2.53 | 11.30492167 | Up | 1.02E-20 | 1.71E-20 |

|                 |   |    |       |      |             |    |          |          |
|-----------------|---|----|-------|------|-------------|----|----------|----------|
| novel mir652    | 0 | 50 | 0.001 | 2.48 | 11.27612441 | Up | 2.51E-20 | 4.19E-20 |
| novel mir232    | 0 | 50 | 0.001 | 2.48 | 11.27612441 | Up | 2.51E-20 | 4.18E-20 |
| mmu-miR-673-5p  | 0 | 50 | 0.001 | 2.48 | 11.27612441 | Up | 2.51E-20 | 4.18E-20 |
| novel mir691    | 0 | 50 | 0.001 | 2.48 | 11.27612441 | Up | 2.51E-20 | 4.17E-20 |
| novel mir719    | 0 | 49 | 0.001 | 2.43 | 11.2467406  | Up | 6.16E-20 | 1.02E-19 |
| novel mir491    | 0 | 49 | 0.001 | 2.43 | 11.2467406  | Up | 6.16E-20 | 1.02E-19 |
| novel mir624    | 0 | 49 | 0.001 | 2.43 | 11.2467406  | Up | 6.16E-20 | 1.02E-19 |
| novel mir250    | 0 | 48 | 0.001 | 2.38 | 11.21674586 | Up | 1.51E-19 | 2.49E-19 |
| novel mir95     | 0 | 47 | 0.001 | 2.33 | 11.18611424 | Up | 3.71E-19 | 6.09E-19 |
| novel mir36     | 0 | 47 | 0.001 | 2.33 | 11.18611424 | Up | 3.71E-19 | 6.08E-19 |
| novel mir305    | 0 | 46 | 0.001 | 2.28 | 11.15481811 | Up | 9.12E-19 | 1.49E-18 |
| novel mir521    | 0 | 46 | 0.001 | 2.28 | 11.15481811 | Up | 9.12E-19 | 1.49E-18 |
| novel mir327    | 0 | 45 | 0.001 | 2.23 | 11.12282799 | Up | 2.24E-18 | 3.64E-18 |
| novel mir473    | 0 | 44 | 0.001 | 2.18 | 11.09011242 | Up | 5.50E-18 | 8.92E-18 |
| novel mir334    | 0 | 44 | 0.001 | 2.18 | 11.09011242 | Up | 5.50E-18 | 8.91E-18 |
| novel mir163    | 0 | 43 | 0.001 | 2.13 | 11.05663772 | Up | 1.35E-17 | 2.18E-17 |
| novel mir335    | 0 | 43 | 0.001 | 2.13 | 11.05663772 | Up | 1.35E-17 | 2.17E-17 |
| novel mir254    | 0 | 42 | 0.001 | 2.08 | 11.02236781 | Up | 3.32E-17 | 5.33E-17 |
| novel mir373    | 0 | 41 | 0.001 | 2.03 | 10.98726401 | Up | 8.15E-17 | 1.30E-16 |
| novel mir567    | 0 | 41 | 0.001 | 2.03 | 10.98726401 | Up | 8.15E-17 | 1.30E-16 |
| novel mir478    | 0 | 40 | 0.001 | 1.98 | 10.95128471 | Up | 2.00E-16 | 3.18E-16 |
| novel mir179    | 0 | 40 | 0.001 | 1.98 | 10.95128471 | Up | 2.00E-16 | 3.17E-16 |
| novel mir729    | 0 | 40 | 0.001 | 1.98 | 10.95128471 | Up | 2.00E-16 | 3.17E-16 |
| novel mir47     | 0 | 39 | 0.001 | 1.93 | 10.91438513 | Up | 4.92E-16 | 7.76E-16 |
| novel mir252    | 0 | 39 | 0.001 | 1.93 | 10.91438513 | Up | 4.92E-16 | 7.75E-16 |
| mmu-miR-5103    | 0 | 38 | 0.001 | 1.88 | 10.87651695 | Up | 1.21E-15 | 1.90E-15 |
| novel mir440    | 0 | 38 | 0.001 | 1.88 | 10.87651695 | Up | 1.21E-15 | 1.90E-15 |
| mmu-miR-6961-5p | 0 | 36 | 0.001 | 1.79 | 10.80574387 | Up | 7.29E-15 | 1.14E-14 |
| novel mir744    | 0 | 36 | 0.001 | 1.79 | 10.80574387 | Up | 7.29E-15 | 1.14E-14 |
| novel mir479    | 0 | 36 | 0.001 | 1.79 | 10.80574387 | Up | 7.29E-15 | 1.14E-14 |
| novel mir733    | 0 | 35 | 0.001 | 1.74 | 10.76487159 | Up | 1.79E-14 | 2.78E-14 |
| novel mir79     | 0 | 33 | 0.001 | 1.64 | 10.6794801  | Up | 1.08E-13 | 1.67E-13 |
| novel mir180    | 0 | 33 | 0.001 | 1.64 | 10.6794801  | Up | 1.08E-13 | 1.67E-13 |
| novel mir688    | 0 | 32 | 0.001 | 1.59 | 10.63481105 | Up | 2.65E-13 | 4.09E-13 |
| novel mir513    | 0 | 31 | 0.001 | 1.54 | 10.58871464 | Up | 6.51E-13 | 1.00E-12 |
| novel mir25     | 0 | 31 | 0.001 | 1.54 | 10.58871464 | Up | 6.51E-13 | 9.98E-13 |

|                   |   |    |       |      |             |    |          |          |
|-------------------|---|----|-------|------|-------------|----|----------|----------|
| novel mir51       | 0 | 31 | 0.001 | 1.54 | 10.58871464 | Up | 6.51E-13 | 9.97E-13 |
| mmu-miR-6979-3p   | 0 | 31 | 0.001 | 1.54 | 10.58871464 | Up | 6.51E-13 | 9.96E-13 |
| novel mir644      | 0 | 31 | 0.001 | 1.54 | 10.58871464 | Up | 6.51E-13 | 9.94E-13 |
| mmu-miR-1930-5p   | 0 | 31 | 0.001 | 1.54 | 10.58871464 | Up | 6.51E-13 | 9.93E-13 |
| novel mir684      | 0 | 30 | 0.001 | 1.49 | 10.54109662 | Up | 1.60E-12 | 2.43E-12 |
| novel mir466      | 0 | 30 | 0.001 | 1.49 | 10.54109662 | Up | 1.60E-12 | 2.43E-12 |
| novel mir388      | 0 | 30 | 0.001 | 1.49 | 10.54109662 | Up | 1.60E-12 | 2.42E-12 |
| novel mir723      | 0 | 29 | 0.001 | 1.44 | 10.4918531  | Up | 3.93E-12 | 5.93E-12 |
| mmu-miR-3076-5p   | 0 | 29 | 0.001 | 1.44 | 10.4918531  | Up | 3.93E-12 | 5.92E-12 |
| novel mir155      | 0 | 29 | 0.001 | 1.44 | 10.4918531  | Up | 3.93E-12 | 5.91E-12 |
| novel mir135      | 0 | 28 | 0.001 | 1.39 | 10.44086917 | Up | 9.65E-12 | 1.45E-11 |
| novel mir716      | 0 | 28 | 0.001 | 1.39 | 10.44086917 | Up | 9.65E-12 | 1.45E-11 |
| novel mir531      | 0 | 27 | 0.001 | 1.34 | 10.38801729 | Up | 2.37E-11 | 3.54E-11 |
| novel mir765      | 0 | 27 | 0.001 | 1.34 | 10.38801729 | Up | 2.37E-11 | 3.54E-11 |
| novel mir666      | 0 | 27 | 0.001 | 1.34 | 10.38801729 | Up | 2.37E-11 | 3.53E-11 |
| novel mir753      | 0 | 27 | 0.001 | 1.34 | 10.38801729 | Up | 2.37E-11 | 3.53E-11 |
| mmu-miR-125b-2-3p | 0 | 27 | 0.001 | 1.34 | 10.38801729 | Up | 2.37E-11 | 3.52E-11 |
| novel mir12       | 0 | 27 | 0.001 | 1.34 | 10.38801729 | Up | 2.37E-11 | 3.52E-11 |
| mmu-miR-136-5p    | 0 | 27 | 0.001 | 1.34 | 10.38801729 | Up | 2.37E-11 | 3.51E-11 |
| novel mir416      | 0 | 26 | 0.001 | 1.29 | 10.33315535 | Up | 5.82E-11 | 8.62E-11 |
| mmu-miR-1199-5p   | 0 | 26 | 0.001 | 1.29 | 10.33315535 | Up | 5.82E-11 | 8.60E-11 |
| novel mir171      | 0 | 25 | 0.001 | 1.24 | 10.27612441 | Up | 1.43E-10 | 2.11E-10 |
| mmu-miR-5107-5p   | 0 | 25 | 0.001 | 1.24 | 10.27612441 | Up | 1.43E-10 | 2.10E-10 |
| novel mir195      | 0 | 25 | 0.001 | 1.24 | 10.27612441 | Up | 1.43E-10 | 2.10E-10 |
| novel mir10       | 0 | 25 | 0.001 | 1.24 | 10.27612441 | Up | 1.43E-10 | 2.10E-10 |
| novel mir175      | 0 | 25 | 0.001 | 1.24 | 10.27612441 | Up | 1.43E-10 | 2.10E-10 |
| novel mir24       | 0 | 25 | 0.001 | 1.24 | 10.27612441 | Up | 1.43E-10 | 2.09E-10 |
| novel mir5        | 0 | 25 | 0.001 | 1.24 | 10.27612441 | Up | 1.43E-10 | 2.09E-10 |
| mmu-miR-496a-3p   | 0 | 25 | 0.001 | 1.24 | 10.27612441 | Up | 1.43E-10 | 2.09E-10 |
| mmu-miR-7015-3p   | 0 | 24 | 0.001 | 1.19 | 10.21674586 | Up | 3.51E-10 | 5.11E-10 |
| mmu-miR-7058-5p   | 0 | 24 | 0.001 | 1.19 | 10.21674586 | Up | 3.51E-10 | 5.10E-10 |
| mmu-miR-669e-5p   | 0 | 23 | 0.001 | 1.14 | 10.15481811 | Up | 8.62E-10 | 1.25E-09 |
| mmu-miR-129-5p    | 0 | 23 | 0.001 | 1.14 | 10.15481811 | Up | 8.62E-10 | 1.25E-09 |
| mmu-miR-671-5p    | 0 | 23 | 0.001 | 1.14 | 10.15481811 | Up | 8.62E-10 | 1.25E-09 |
| mmu-miR-5120      | 0 | 23 | 0.001 | 1.14 | 10.15481811 | Up | 8.62E-10 | 1.24E-09 |
| novel mir83       | 0 | 23 | 0.001 | 1.14 | 10.15481811 | Up | 8.62E-10 | 1.24E-09 |

|                 |   |     |       |       |             |    |           |           |
|-----------------|---|-----|-------|-------|-------------|----|-----------|-----------|
| novel mir707    | 0 | 23  | 0.001 | 1.14  | 10.15481811 | Up | 8.62E-10  | 1.24E-09  |
| novel mir34     | 0 | 23  | 0.001 | 1.14  | 10.15481811 | Up | 8.62E-10  | 1.24E-09  |
| novel mir410    | 0 | 23  | 0.001 | 1.14  | 10.15481811 | Up | 8.62E-10  | 1.24E-09  |
| novel mir417    | 0 | 22  | 0.001 | 1.09  | 10.09011242 | Up | 2.12E-09  | 3.03E-09  |
| novel mir297    | 0 | 22  | 0.001 | 1.09  | 10.09011242 | Up | 2.12E-09  | 3.03E-09  |
| novel mir566    | 0 | 22  | 0.001 | 1.09  | 10.09011242 | Up | 2.12E-09  | 3.02E-09  |
| novel mir393    | 0 | 22  | 0.001 | 1.09  | 10.09011242 | Up | 2.12E-09  | 3.02E-09  |
| novel mir574    | 0 | 22  | 0.001 | 1.09  | 10.09011242 | Up | 2.12E-09  | 3.01E-09  |
| mmu-miR-672-5p  | 0 | 22  | 0.001 | 1.09  | 10.09011242 | Up | 2.12E-09  | 3.01E-09  |
| mmu-miR-3091-3p | 0 | 21  | 0.001 | 1.04  | 10.02236781 | Up | 5.20E-09  | 7.36E-09  |
| novel mir391    | 0 | 21  | 0.001 | 1.04  | 10.02236781 | Up | 5.20E-09  | 7.35E-09  |
| novel mir321    | 0 | 20  | 0.001 | 0.99  | 9.951284715 | Up | 1.28E-08  | 1.80E-08  |
| novel mir372    | 0 | 20  | 0.001 | 0.99  | 9.951284715 | Up | 1.28E-08  | 1.80E-08  |
| novel mir612    | 0 | 20  | 0.001 | 0.99  | 9.951284715 | Up | 1.28E-08  | 1.79E-08  |
| mmu-miR-879-3p  | 0 | 19  | 0.001 | 0.94  | 9.876516947 | Up | 3.14E-08  | 4.38E-08  |
| mmu-miR-490-5p  | 0 | 19  | 0.001 | 0.94  | 9.876516947 | Up | 3.14E-08  | 4.38E-08  |
| novel mir746    | 0 | 19  | 0.001 | 0.94  | 9.876516947 | Up | 3.14E-08  | 4.37E-08  |
| novel mir598    | 0 | 19  | 0.001 | 0.94  | 9.876516947 | Up | 3.14E-08  | 4.37E-08  |
| mmu-miR-664-5p  | 0 | 19  | 0.001 | 0.94  | 9.876516947 | Up | 3.14E-08  | 4.36E-08  |
| novel mir294    | 0 | 19  | 0.001 | 0.94  | 9.876516947 | Up | 3.14E-08  | 4.36E-08  |
| mmu-miR-6904-5p | 0 | 19  | 0.001 | 0.94  | 9.876516947 | Up | 3.14E-08  | 4.35E-08  |
| mmu-miR-185-3p  | 0 | 19  | 0.001 | 0.94  | 9.876516947 | Up | 3.14E-08  | 4.35E-08  |
| mmu-miR-202-3p  | 1 | 545 | 0.03  | 27.02 | 9.814849459 | Up | 5.57E-211 | 3.45E-210 |
| novel mir31     | 0 | 18  | 0.001 | 0.89  | 9.797661526 | Up | 7.70E-08  | 1.06E-07  |
| mmu-miR-6985-3p | 0 | 18  | 0.001 | 0.89  | 9.797661526 | Up | 7.70E-08  | 1.06E-07  |
| mmu-miR-377-3p  | 0 | 18  | 0.001 | 0.89  | 9.797661526 | Up | 7.70E-08  | 1.06E-07  |
| mmu-miR-3572-3p | 0 | 18  | 0.001 | 0.89  | 9.797661526 | Up | 7.70E-08  | 1.06E-07  |
| novel mir583    | 0 | 18  | 0.001 | 0.89  | 9.797661526 | Up | 7.70E-08  | 1.06E-07  |
| novel mir406    | 0 | 18  | 0.001 | 0.89  | 9.797661526 | Up | 7.70E-08  | 1.06E-07  |
| novel mir770    | 0 | 18  | 0.001 | 0.89  | 9.797661526 | Up | 7.70E-08  | 1.06E-07  |
| mmu-miR-500-3p  | 1 | 524 | 0.03  | 25.98 | 9.758223215 | Up | 8.39E-203 | 5.11E-202 |
| mmu-miR-672-3p  | 0 | 17  | 0.001 | 0.84  | 9.714245518 | Up | 1.89E-07  | 2.59E-07  |
| mmu-miR-3058-5p | 0 | 17  | 0.001 | 0.84  | 9.714245518 | Up | 1.89E-07  | 2.58E-07  |
| novel mir288    | 0 | 17  | 0.001 | 0.84  | 9.714245518 | Up | 1.89E-07  | 2.58E-07  |
| novel mir665    | 0 | 17  | 0.001 | 0.84  | 9.714245518 | Up | 1.89E-07  | 2.58E-07  |
| novel mir561    | 0 | 17  | 0.001 | 0.84  | 9.714245518 | Up | 1.89E-07  | 2.57E-07  |

|                 |   |     |       |       |             |    |           |           |
|-----------------|---|-----|-------|-------|-------------|----|-----------|-----------|
| mmu-miR-195a-3p | 0 | 17  | 0.001 | 0.84  | 9.714245518 | Up | 1.89E-07  | 2.57E-07  |
| novel mir484    | 0 | 17  | 0.001 | 0.84  | 9.714245518 | Up | 1.89E-07  | 2.57E-07  |
| novel mir628    | 0 | 16  | 0.001 | 0.79  | 9.625708843 | Up | 4.65E-07  | 6.28E-07  |
| novel mir115    | 0 | 16  | 0.001 | 0.79  | 9.625708843 | Up | 4.65E-07  | 6.27E-07  |
| novel mir604    | 0 | 16  | 0.001 | 0.79  | 9.625708843 | Up | 4.65E-07  | 6.26E-07  |
| novel mir534    | 0 | 16  | 0.001 | 0.79  | 9.625708843 | Up | 4.65E-07  | 6.25E-07  |
| mmu-miR-3079-3p | 0 | 16  | 0.001 | 0.79  | 9.625708843 | Up | 4.65E-07  | 6.25E-07  |
| novel mir428    | 0 | 16  | 0.001 | 0.79  | 9.625708843 | Up | 4.65E-07  | 6.24E-07  |
| novel mir317    | 0 | 16  | 0.001 | 0.79  | 9.625708843 | Up | 4.65E-07  | 6.23E-07  |
| novel mir739    | 0 | 16  | 0.001 | 0.79  | 9.625708843 | Up | 4.65E-07  | 6.22E-07  |
| novel mir399    | 0 | 16  | 0.001 | 0.79  | 9.625708843 | Up | 4.65E-07  | 6.21E-07  |
| novel mir278    | 0 | 16  | 0.001 | 0.79  | 9.625708843 | Up | 4.65E-07  | 6.21E-07  |
| novel mir608    | 0 | 16  | 0.001 | 0.79  | 9.625708843 | Up | 4.65E-07  | 6.20E-07  |
| novel mir692    | 0 | 16  | 0.001 | 0.79  | 9.625708843 | Up | 4.65E-07  | 6.19E-07  |
| novel mir29     | 0 | 16  | 0.001 | 0.79  | 9.625708843 | Up | 4.65E-07  | 6.18E-07  |
| novel mir138    | 0 | 16  | 0.001 | 0.79  | 9.625708843 | Up | 4.65E-07  | 6.18E-07  |
| novel mir759    | 0 | 16  | 0.001 | 0.79  | 9.625708843 | Up | 4.65E-07  | 6.17E-07  |
| novel mir563    | 0 | 16  | 0.001 | 0.79  | 9.625708843 | Up | 4.65E-07  | 6.16E-07  |
| mmu-miR-505-3p  | 0 | 15  | 0.001 | 0.74  | 9.531381461 | Up | 1.14E-06  | 1.51E-06  |
| novel mir730    | 0 | 15  | 0.001 | 0.74  | 9.531381461 | Up | 1.14E-06  | 1.51E-06  |
| novel mir728    | 0 | 15  | 0.001 | 0.74  | 9.531381461 | Up | 1.14E-06  | 1.51E-06  |
| mmu-miR-6983-5p | 0 | 15  | 0.001 | 0.74  | 9.531381461 | Up | 1.14E-06  | 1.50E-06  |
| novel mir623    | 0 | 15  | 0.001 | 0.74  | 9.531381461 | Up | 1.14E-06  | 1.50E-06  |
| novel mir489    | 0 | 15  | 0.001 | 0.74  | 9.531381461 | Up | 1.14E-06  | 1.50E-06  |
| novel mir414    | 0 | 15  | 0.001 | 0.74  | 9.531381461 | Up | 1.14E-06  | 1.50E-06  |
| mmu-miR-744-3p  | 0 | 15  | 0.001 | 0.74  | 9.531381461 | Up | 1.14E-06  | 1.50E-06  |
| novel mir433    | 0 | 15  | 0.001 | 0.74  | 9.531381461 | Up | 1.14E-06  | 1.49E-06  |
| novel mir565    | 0 | 15  | 0.001 | 0.74  | 9.531381461 | Up | 1.14E-06  | 1.49E-06  |
| mmu-miR-671-3p  | 0 | 15  | 0.001 | 0.74  | 9.531381461 | Up | 1.14E-06  | 1.49E-06  |
| mmu-miR-188-5p  | 1 | 431 | 0.03  | 21.37 | 9.476408692 | Up | 1.35E-166 | 7.55E-166 |
| mmu-miR-7051-5p | 0 | 14  | 0.001 | 0.69  | 9.430452552 | Up | 2.80E-06  | 3.64E-06  |
| novel mir4      | 0 | 14  | 0.001 | 0.69  | 9.430452552 | Up | 2.80E-06  | 3.64E-06  |
| novel mir264    | 0 | 14  | 0.001 | 0.69  | 9.430452552 | Up | 2.80E-06  | 3.64E-06  |
| novel mir577    | 0 | 14  | 0.001 | 0.69  | 9.430452552 | Up | 2.80E-06  | 3.63E-06  |
| novel mir409    | 0 | 14  | 0.001 | 0.69  | 9.430452552 | Up | 2.80E-06  | 3.63E-06  |
| mmu-miR-6928-3p | 0 | 14  | 0.001 | 0.69  | 9.430452552 | Up | 2.80E-06  | 3.62E-06  |

|                 |   |    |       |      |             |    |          |          |
|-----------------|---|----|-------|------|-------------|----|----------|----------|
| novel mir299    | 0 | 14 | 0.001 | 0.69 | 9.430452552 | Up | 2.80E-06 | 3.62E-06 |
| novel mir356    | 0 | 14 | 0.001 | 0.69 | 9.430452552 | Up | 2.80E-06 | 3.61E-06 |
| novel mir132    | 0 | 14 | 0.001 | 0.69 | 9.430452552 | Up | 2.80E-06 | 3.61E-06 |
| novel mir429    | 0 | 14 | 0.001 | 0.69 | 9.430452552 | Up | 2.80E-06 | 3.61E-06 |
| novel mir655    | 0 | 13 | 0.001 | 0.64 | 9.321928095 | Up | 6.88E-06 | 8.81E-06 |
| mmu-miR-6935-3p | 0 | 13 | 0.001 | 0.64 | 9.321928095 | Up | 6.88E-06 | 8.80E-06 |
| novel mir475    | 0 | 13 | 0.001 | 0.64 | 9.321928095 | Up | 6.88E-06 | 8.79E-06 |
| novel mir487    | 0 | 13 | 0.001 | 0.64 | 9.321928095 | Up | 6.88E-06 | 8.78E-06 |
| novel mir390    | 0 | 13 | 0.001 | 0.64 | 9.321928095 | Up | 6.88E-06 | 8.77E-06 |
| novel mir43     | 0 | 13 | 0.001 | 0.64 | 9.321928095 | Up | 6.88E-06 | 8.76E-06 |
| novel mir6      | 0 | 13 | 0.001 | 0.64 | 9.321928095 | Up | 6.88E-06 | 8.75E-06 |
| novel mir762    | 0 | 13 | 0.001 | 0.64 | 9.321928095 | Up | 6.88E-06 | 8.74E-06 |
| mmu-miR-674-3p  | 0 | 13 | 0.001 | 0.64 | 9.321928095 | Up | 6.88E-06 | 8.73E-06 |
| novel mir215    | 0 | 13 | 0.001 | 0.64 | 9.321928095 | Up | 6.88E-06 | 8.72E-06 |
| mmu-miR-3082-3p | 0 | 13 | 0.001 | 0.64 | 9.321928095 | Up | 6.88E-06 | 8.71E-06 |
| novel mir351    | 0 | 13 | 0.001 | 0.64 | 9.321928095 | Up | 6.88E-06 | 8.70E-06 |
| novel mir724    | 0 | 13 | 0.001 | 0.64 | 9.321928095 | Up | 6.88E-06 | 8.69E-06 |
| novel mir735    | 0 | 13 | 0.001 | 0.64 | 9.321928095 | Up | 6.88E-06 | 8.68E-06 |
| mmu-miR-7052-3p | 0 | 12 | 0.001 | 0.6  | 9.22881869  | Up | 1.69E-05 | 2.12E-05 |
| novel mir76     | 0 | 12 | 0.001 | 0.6  | 9.22881869  | Up | 1.69E-05 | 2.12E-05 |
| novel mir494    | 0 | 12 | 0.001 | 0.6  | 9.22881869  | Up | 1.69E-05 | 2.12E-05 |
| novel mir569    | 0 | 12 | 0.001 | 0.6  | 9.22881869  | Up | 1.69E-05 | 2.12E-05 |
| novel mir549    | 0 | 12 | 0.001 | 0.6  | 9.22881869  | Up | 1.69E-05 | 2.11E-05 |
| mmu-miR-7091-3p | 0 | 12 | 0.001 | 0.6  | 9.22881869  | Up | 1.69E-05 | 2.11E-05 |
| mmu-miR-1943-3p | 0 | 12 | 0.001 | 0.6  | 9.22881869  | Up | 1.69E-05 | 2.11E-05 |
| novel mir467    | 0 | 12 | 0.001 | 0.6  | 9.22881869  | Up | 1.69E-05 | 2.11E-05 |
| novel mir105    | 0 | 12 | 0.001 | 0.6  | 9.22881869  | Up | 1.69E-05 | 2.10E-05 |
| novel mir726    | 0 | 12 | 0.001 | 0.6  | 9.22881869  | Up | 1.69E-05 | 2.10E-05 |
| novel mir654    | 0 | 12 | 0.001 | 0.6  | 9.22881869  | Up | 1.69E-05 | 2.10E-05 |
| mmu-miR-1938    | 0 | 12 | 0.001 | 0.6  | 9.22881869  | Up | 1.69E-05 | 2.10E-05 |
| novel mir128    | 0 | 12 | 0.001 | 0.6  | 9.22881869  | Up | 1.69E-05 | 2.09E-05 |
| novel mir144    | 0 | 11 | 0.001 | 0.55 | 9.103287808 | Up | 4.15E-05 | 5.13E-05 |
| novel mir108    | 0 | 11 | 0.001 | 0.55 | 9.103287808 | Up | 4.15E-05 | 5.12E-05 |
| novel mir33     | 0 | 11 | 0.001 | 0.55 | 9.103287808 | Up | 4.15E-05 | 5.12E-05 |
| novel mir758    | 0 | 11 | 0.001 | 0.55 | 9.103287808 | Up | 4.15E-05 | 5.11E-05 |
| novel mir734    | 0 | 11 | 0.001 | 0.55 | 9.103287808 | Up | 4.15E-05 | 5.10E-05 |

|                 |   |    |       |      |             |    |             |             |
|-----------------|---|----|-------|------|-------------|----|-------------|-------------|
| novel mir116    | 0 | 11 | 0.001 | 0.55 | 9.103287808 | Up | 4.15E-05    | 5.10E-05    |
| novel mir253    | 0 | 11 | 0.001 | 0.55 | 9.103287808 | Up | 4.15E-05    | 5.09E-05    |
| mmu-let-7g-3p   | 0 | 11 | 0.001 | 0.55 | 9.103287808 | Up | 4.15E-05    | 5.09E-05    |
| novel mir184    | 0 | 11 | 0.001 | 0.55 | 9.103287808 | Up | 4.15E-05    | 5.08E-05    |
| novel mir100    | 0 | 11 | 0.001 | 0.55 | 9.103287808 | Up | 4.15E-05    | 5.07E-05    |
| novel mir272    | 0 | 11 | 0.001 | 0.55 | 9.103287808 | Up | 4.15E-05    | 5.07E-05    |
| novel mir68     | 0 | 11 | 0.001 | 0.55 | 9.103287808 | Up | 4.15E-05    | 5.06E-05    |
| novel mir718    | 0 | 11 | 0.001 | 0.55 | 9.103287808 | Up | 4.15E-05    | 5.06E-05    |
| novel mir455    | 0 | 10 | 0.001 | 0.5  | 8.965784285 | Up | 0.000101972 | 0.000123791 |
| mmu-miR-6954-3p | 0 | 10 | 0.001 | 0.5  | 8.965784285 | Up | 0.000101972 | 0.000123652 |
| mmu-miR-5620-5p | 0 | 10 | 0.001 | 0.5  | 8.965784285 | Up | 0.000101972 | 0.000123513 |
| novel mir668    | 0 | 10 | 0.001 | 0.5  | 8.965784285 | Up | 0.000101972 | 0.000123374 |
| novel mir547    | 0 | 10 | 0.001 | 0.5  | 8.965784285 | Up | 0.000101972 | 0.000123236 |
| novel mir285    | 0 | 10 | 0.001 | 0.5  | 8.965784285 | Up | 0.000101972 | 0.000123098 |
| novel mir512    | 0 | 10 | 0.001 | 0.5  | 8.965784285 | Up | 0.000101972 | 0.00012296  |
| mmu-miR-344-3p  | 0 | 10 | 0.001 | 0.5  | 8.965784285 | Up | 0.000101972 | 0.000122823 |
| mmu-miR-3154    | 0 | 10 | 0.001 | 0.5  | 8.965784285 | Up | 0.000101972 | 0.000122686 |
| mmu-miR-18b-5p  | 0 | 9  | 0.001 | 0.45 | 8.813781191 | Up | 0.000250446 | 0.000299979 |
| mmu-miR-7679-5p | 0 | 9  | 0.001 | 0.45 | 8.813781191 | Up | 0.000250446 | 0.000299646 |
| mmu-miR-666-5p  | 0 | 9  | 0.001 | 0.45 | 8.813781191 | Up | 0.000250446 | 0.000299314 |
| mmu-miR-6967-5p | 0 | 9  | 0.001 | 0.45 | 8.813781191 | Up | 0.000250446 | 0.000298982 |
| mmu-miR-8099    | 0 | 9  | 0.001 | 0.45 | 8.813781191 | Up | 0.000250446 | 0.000298651 |
| mmu-miR-1839-3p | 0 | 9  | 0.001 | 0.45 | 8.813781191 | Up | 0.000250446 | 0.000298321 |
| mmu-miR-351-3p  | 0 | 9  | 0.001 | 0.45 | 8.813781191 | Up | 0.000250446 | 0.000297992 |
| mmu-miR-665-3p  | 0 | 9  | 0.001 | 0.45 | 8.813781191 | Up | 0.000250446 | 0.000297663 |
| mmu-miR-181c-3p | 0 | 9  | 0.001 | 0.45 | 8.813781191 | Up | 0.000250446 | 0.000297336 |
| mmu-miR-6240    | 0 | 9  | 0.001 | 0.45 | 8.813781191 | Up | 0.000250446 | 0.000297009 |
| mmu-miR-3569-5p | 0 | 9  | 0.001 | 0.45 | 8.813781191 | Up | 0.000250446 | 0.000296682 |
| mmu-miR-129b-3p | 0 | 9  | 0.001 | 0.45 | 8.813781191 | Up | 0.000250446 | 0.000296357 |
| mmu-miR-376b-5p | 0 | 9  | 0.001 | 0.45 | 8.813781191 | Up | 0.000250446 | 0.000296032 |
| mmu-miR-5627-5p | 0 | 9  | 0.001 | 0.45 | 8.813781191 | Up | 0.000250446 | 0.000295707 |
| mmu-miR-6911-3p | 0 | 9  | 0.001 | 0.45 | 8.813781191 | Up | 0.000250446 | 0.000295384 |
| mmu-miR-362-3p  | 0 | 9  | 0.001 | 0.45 | 8.813781191 | Up | 0.000250446 | 0.000295061 |
| mmu-miR-184-5p  | 0 | 8  | 0.001 | 0.4  | 8.64385619  | Up | 0.0006151   | 0.000723095 |
| mmu-miR-344d-3p | 0 | 8  | 0.001 | 0.4  | 8.64385619  | Up | 0.0006151   | 0.000722307 |
| mmu-miR-7053-5p | 0 | 8  | 0.001 | 0.4  | 8.64385619  | Up | 0.0006151   | 0.000721521 |



|                   |     |      |       |        |             |    |           |             |
|-------------------|-----|------|-------|--------|-------------|----|-----------|-------------|
| mmu-miR-8103      | 0   | 8    | 0.001 | 0.4    | 8.64385619  | Up | 0.0006151 | 0.000720737 |
| mmu-miR-8098      | 0   | 8    | 0.001 | 0.4    | 8.64385619  | Up | 0.0006151 | 0.000719954 |
| mmu-miR-3072-3p   | 0   | 8    | 0.001 | 0.4    | 8.64385619  | Up | 0.0006151 | 0.000719173 |
| mmu-miR-6913-5p   | 0   | 8    | 0.001 | 0.4    | 8.64385619  | Up | 0.0006151 | 0.000718394 |
| mmu-miR-6976-5p   | 0   | 8    | 0.001 | 0.4    | 8.64385619  | Up | 0.0006151 | 0.000717617 |
| mmu-miR-324-3p    | 2   | 547  | 0.07  | 27.12  | 8.597786541 | Up | 1.51E-209 | 9.27E-209   |
| mmu-miR-200b-5p   | 1   | 202  | 0.03  | 10.02  | 8.383704292 | Up | 1.47E-77  | 4.68E-77    |
| mmu-miR-193a-5p   | 3   | 410  | 0.1   | 20.33  | 7.667466405 | Up | 2.03E-154 | 1.09E-153   |
| mmu-miR-200a-5p   | 1   | 79   | 0.03  | 3.92   | 7.029747343 | Up | 5.86E-30  | 1.09E-29    |
| mmu-miR-541-5p    | 1   | 73   | 0.03  | 3.62   | 6.914883386 | Up | 1.19E-27  | 2.14E-27    |
| mmu-miR-2137      | 2   | 163  | 0.07  | 8.08   | 6.850856561 | Up | 9.75E-61  | 2.49E-60    |
| mmu-miR-378d      | 2   | 162  | 0.07  | 8.03   | 6.841901255 | Up | 2.37E-60  | 6.00E-60    |
| mmu-miR-25-5p     | 1   | 58   | 0.03  | 2.88   | 6.584962501 | Up | 6.81E-22  | 1.16E-21    |
| mmu-miR-1943-5p   | 1   | 53   | 0.03  | 2.63   | 6.453956489 | Up | 5.59E-20  | 9.28E-20    |
| mmu-miR-700-5p    | 2   | 89   | 0.07  | 4.41   | 5.977279923 | Up | 2.26E-32  | 4.24E-32    |
| mmu-miR-6691-5p   | 1   | 35   | 0.03  | 1.74   | 5.857980995 | Up | 4.00E-13  | 6.15E-13    |
| mmu-miR-3474      | 1   | 29   | 0.03  | 1.44   | 5.584962501 | Up | 7.38E-11  | 1.09E-10    |
| mmu-miR-8096      | 1   | 27   | 0.03  | 1.34   | 5.48112669  | Up | 4.17E-10  | 6.05E-10    |
| mmu-miR-20b-5p    | 2   | 62   | 0.07  | 3.07   | 5.454739923 | Up | 3.89E-22  | 6.62E-22    |
| mmu-miR-3099-3p   | 1   | 26   | 0.03  | 1.29   | 5.426264755 | Up | 9.89E-10  | 1.42E-09    |
| mmu-miR-99b-3p    | 9   | 252  | 0.31  | 12.5   | 5.333516069 | Up | 4.83E-85  | 1.67E-84    |
| mmu-miR-33-5p     | 3   | 81   | 0.1   | 4.02   | 5.329123596 | Up | 4.23E-28  | 7.66E-28    |
| mmu-miR-874-3p    | 2   | 56   | 0.07  | 2.78   | 5.311586151 | Up | 7.03E-20  | 1.16E-19    |
| mmu-miR-380-3p    | 1   | 22   | 0.03  | 1.09   | 5.183221824 | Up | 3.10E-08  | 4.34E-08    |
| mmu-miR-181a-1-3p | 1   | 19   | 0.03  | 0.94   | 4.969626351 | Up | 4.03E-07  | 5.46E-07    |
| mmu-miR-1947-5p   | 2   | 44   | 0.07  | 2.18   | 4.960829403 | Up | 2.15E-15  | 3.38E-15    |
| mmu-miR-1188-5p   | 13  | 259  | 0.44  | 12.84  | 4.866997868 | Up | 4.51E-83  | 1.53E-82    |
| mmu-miR-1945      | 1   | 16   | 0.03  | 0.79   | 4.718818247 | Up | 5.15E-06  | 6.61E-06    |
| mmu-miR-384-5p    | 1   | 15   | 0.03  | 0.74   | 4.624490865 | Up | 1.20E-05  | 1.51E-05    |
| mmu-miR-3057-5p   | 1   | 13   | 0.03  | 0.64   | 4.415037499 | Up | 6.40E-05  | 7.78E-05    |
| mmu-miR-322-3p    | 2   | 30   | 0.07  | 1.49   | 4.411813598 | Up | 3.10E-10  | 4.51E-10    |
| novel mir679      | 322 | 3758 | 10.97 | 186.34 | 4.086301968 | Up | 0         | 0           |
| mmu-miR-3065-3p   | 5   | 50   | 0.17  | 2.48   | 3.866733469 | Up | 7.50E-15  | 1.17E-14    |
| mmu-miR-30d-3p    | 3   | 29   | 0.1   | 1.44   | 3.847996907 | Up | 4.77E-09  | 6.76E-09    |
| mmu-miR-7115-5p   | 3   | 28   | 0.1   | 1.39   | 3.797012978 | Up | 1.07E-08  | 1.51E-08    |
| mmu-miR-1934-3p   | 2   | 19   | 0.07  | 0.94   | 3.74723393  | Up | 2.72E-06  | 3.54E-06    |

|                 |       |        |         |         |              |      |             |             |
|-----------------|-------|--------|---------|---------|--------------|------|-------------|-------------|
| mmu-miR-501-3p  | 213   | 1688   | 7.25    | 83.7    | 3.529174723  | Up   | 0           | 0           |
| mmu-miR-669a-3p | 3     | 23     | 0.1     | 1.14    | 3.510961919  | Up   | 5.71E-07    | 7.56E-07    |
| mmu-miR-132-3p  | 2     | 14     | 0.07    | 0.69    | 3.301169535  | Up   | 0.000145922 | 0.000175171 |
| mmu-miR-145a-3p | 3     | 17     | 0.1     | 0.84    | 3.070389328  | Up   | 5.85E-05    | 7.12E-05    |
| mmu-miR-378c    | 20    | 110    | 0.68    | 5.45    | 3.002649578  | Up   | 6.25E-25    | 1.10E-24    |
| mmu-miR-29c-5p  | 3     | 16     | 0.1     | 0.79    | 2.981852653  | Up   | 0.000123935 | 0.000148943 |
| novel mir1      | 3055  | 14537  | 104.04  | 720.82  | 2.792500737  | Up   | 0           | 0           |
| mmu-miR-378b    | 1358  | 6140   | 46.25   | 304.45  | 2.718680042  | Up   | 0           | 0           |
| mmu-miR-449a-5p | 6     | 25     | 0.2     | 1.24    | 2.632268215  | Up   | 6.60E-06    | 8.45E-06    |
| mmu-miR-29b-3p  | 6     | 23     | 0.2     | 1.14    | 2.510961919  | Up   | 2.64E-05    | 3.27E-05    |
| mmu-miR-142a-3p | 9     | 34     | 0.31    | 1.69    | 2.446683126  | Up   | 3.38E-07    | 4.59E-07    |
| mmu-miR-378a-3p | 32847 | 115383 | 1118.61 | 5721.28 | 2.354630819  | Up   | 0           | 0           |
| mmu-miR-5126    | 1718  | 5337   | 58.51   | 264.64  | 2.177276016  | Up   | 0           | 0           |
| mmu-miR-134-5p  | 350   | 1046   | 11.92   | 51.87   | 2.121516134  | Up   | 1.96E-148   | 1.03E-147   |
| novel mir441    | 7068  | 18459  | 240.7   | 915.29  | 1.926992777  | Up   | 0           | 0           |
| mmu-miR-34c-3p  | 285   | 732    | 9.71    | 36.3    | 1.902426347  | Up   | 1.83E-90    | 6.82E-90    |
| mmu-miR-1981-5p | 5585  | 11985  | 190.2   | 594.28  | 1.643625583  | Up   | 0           | 0           |
| mmu-miR-140-3p  | 487   | 964    | 16.58   | 47.8    | 1.527566611  | Up   | 9.06E-87    | 3.18E-86    |
| mmu-miR-532-3p  | 868   | 1669   | 29.56   | 82.76   | 1.485287376  | Up   | 9.21E-143   | 4.77E-142   |
| novel mir498    | 95    | 181    | 3.24    | 8.97    | 1.469114172  | Up   | 8.92E-17    | 1.42E-16    |
| mmu-miR-877-5p  | 2487  | 4330   | 84.7    | 214.7   | 1.341888317  | Up   | 0           | 0           |
| mmu-miR-330-5p  | 175   | 293    | 5.96    | 14.53   | 1.285650467  | Up   | 1.57E-21    | 2.66E-21    |
| novel mir507    | 1396  | 0      | 47.54   | 0.001   | -15.53685428 | Down | 0           | 0           |
| novel mir453    | 1020  | 0      | 34.74   | 0.001   | -15.08431013 | Down | 2.94E-232   | 1.86E-231   |
| novel mir727    | 849   | 0      | 28.91   | 0.001   | -14.81928099 | Down | 1.98E-193   | 1.17E-192   |
| mmu-miR-7115-3p | 800   | 0      | 27.24   | 0.001   | -14.73343908 | Down | 2.64E-182   | 1.52E-181   |
| novel mir589    | 731   | 0      | 24.89   | 0.001   | -14.60327861 | Down | 1.23E-166   | 6.90E-166   |
| mmu-miR-297c-5p | 728   | 0      | 24.79   | 0.001   | -14.59747065 | Down | 5.90E-166   | 3.28E-165   |
| novel mir361    | 663   | 0      | 22.58   | 0.001   | -14.46275787 | Down | 3.39E-151   | 1.80E-150   |
| novel mir201    | 627   | 0      | 21.35   | 0.001   | -14.38194845 | Down | 5.06E-143   | 2.64E-142   |
| novel mir714    | 555   | 0      | 18.9    | 0.001   | -14.20609861 | Down | 1.13E-126   | 5.49E-126   |
| mmu-miR-3470b   | 535   | 0      | 18.22   | 0.001   | -14.15323534 | Down | 3.93E-122   | 1.87E-121   |
| novel mir439    | 517   | 0      | 17.61   | 0.001   | -14.10410729 | Down | 4.80E-118   | 2.26E-117   |
| novel mir147    | 515   | 0      | 17.54   | 0.001   | -14.09836113 | Down | 1.37E-117   | 6.40E-117   |
| novel mir774    | 510   | 0      | 17.37   | 0.001   | -14.08431013 | Down | 1.87E-116   | 8.67E-116   |
| novel mir154    | 509   | 0      | 17.33   | 0.001   | -14.08098403 | Down | 3.15E-116   | 1.46E-115   |

|                 |     |   |       |       |              |      |           |           |
|-----------------|-----|---|-------|-------|--------------|------|-----------|-----------|
| novel mir57     | 508 | 0 | 17.3  | 0.001 | -14.07848442 | Down | 5.31E-116 | 2.45E-115 |
| mmu-miR-7031-5p | 502 | 0 | 17.1  | 0.001 | -14.0617087  | Down | 1.22E-114 | 5.56E-114 |
| novel mir485    | 498 | 0 | 16.96 | 0.001 | -14.04984855 | Down | 9.90E-114 | 4.45E-113 |
| novel mir596    | 492 | 0 | 16.76 | 0.001 | -14.03273453 | Down | 2.28E-112 | 1.01E-111 |
| novel mir121    | 485 | 0 | 16.52 | 0.001 | -14.01192607 | Down | 8.86E-111 | 3.88E-110 |
| novel mir30     | 472 | 0 | 16.07 | 0.001 | -13.97208231 | Down | 7.93E-108 | 3.45E-107 |
| novel mir555    | 467 | 0 | 15.9  | 0.001 | -13.95673915 | Down | 1.08E-106 | 4.67E-106 |
| novel mir518    | 463 | 0 | 15.77 | 0.001 | -13.94489504 | Down | 8.77E-106 | 3.77E-105 |
| mmu-miR-6924-5p | 462 | 0 | 15.73 | 0.001 | -13.94123105 | Down | 1.48E-105 | 6.33E-105 |
| novel mir741    | 462 | 0 | 15.73 | 0.001 | -13.94123105 | Down | 1.48E-105 | 6.30E-105 |
| novel mir345    | 461 | 0 | 15.7  | 0.001 | -13.93847694 | Down | 2.50E-105 | 1.06E-104 |
| novel mir755    | 456 | 0 | 15.53 | 0.001 | -13.92277021 | Down | 3.41E-104 | 1.43E-103 |
| novel mir194    | 456 | 0 | 15.53 | 0.001 | -13.92277021 | Down | 3.41E-104 | 1.42E-103 |
| novel mir508    | 455 | 0 | 15.5  | 0.001 | -13.9199806  | Down | 5.75E-104 | 2.39E-103 |
| novel mir686    | 451 | 0 | 15.36 | 0.001 | -13.9068906  | Down | 4.65E-103 | 1.93E-102 |
| novel mir183    | 442 | 0 | 15.05 | 0.001 | -13.87747587 | Down | 5.14E-101 | 2.11E-100 |
| novel mir401    | 439 | 0 | 14.95 | 0.001 | -13.86785786 | Down | 2.47E-100 | 1.01E-99  |
| novel mir709    | 438 | 0 | 14.92 | 0.001 | -13.86495992 | Down | 4.16E-100 | 1.69E-99  |
| novel mir273    | 438 | 0 | 14.92 | 0.001 | -13.86495992 | Down | 4.16E-100 | 1.69E-99  |
| novel mir593    | 436 | 0 | 14.85 | 0.001 | -13.85817531 | Down | 1.18E-99  | 4.77E-99  |
| mmu-miR-6919-3p | 431 | 0 | 14.68 | 0.001 | -13.84156435 | Down | 1.62E-98  | 6.46E-98  |
| novel mir315    | 426 | 0 | 14.51 | 0.001 | -13.8247599  | Down | 2.21E-97  | 8.79E-97  |
| novel mir23     | 425 | 0 | 14.47 | 0.001 | -13.8207773  | Down | 3.73E-97  | 1.48E-96  |
| novel mir44     | 424 | 0 | 14.44 | 0.001 | -13.81778312 | Down | 6.29E-97  | 2.48E-96  |
| novel mir600    | 421 | 0 | 14.34 | 0.001 | -13.8077574  | Down | 3.02E-96  | 1.19E-95  |
| novel mir443    | 417 | 0 | 14.2  | 0.001 | -13.79360331 | Down | 2.44E-95  | 9.58E-95  |
| novel mir516    | 414 | 0 | 14.1  | 0.001 | -13.78340754 | Down | 1.17E-94  | 4.58E-94  |
| novel mir324    | 412 | 0 | 14.03 | 0.001 | -13.77622739 | Down | 3.34E-94  | 1.30E-93  |
| novel mir435    | 411 | 0 | 14    | 0.001 | -13.77313921 | Down | 5.63E-94  | 2.18E-93  |
| novel mir326    | 411 | 0 | 14    | 0.001 | -13.77313921 | Down | 5.63E-94  | 2.17E-93  |
| novel mir533    | 409 | 0 | 13.93 | 0.001 | -13.76590764 | Down | 1.60E-93  | 6.16E-93  |
| novel mir751    | 403 | 0 | 13.72 | 0.001 | -13.74399286 | Down | 3.69E-92  | 1.41E-91  |
| novel mir368    | 403 | 0 | 13.72 | 0.001 | -13.74399286 | Down | 3.69E-92  | 1.41E-91  |
| novel mir208    | 402 | 0 | 13.69 | 0.001 | -13.74083483 | Down | 6.22E-92  | 2.36E-91  |
| novel mir411    | 400 | 0 | 13.62 | 0.001 | -13.73343908 | Down | 1.77E-91  | 6.70E-91  |
| novel mir592    | 397 | 0 | 13.52 | 0.001 | -13.72280753 | Down | 8.50E-91  | 3.19E-90  |

|                 |     |   |       |       |              |      |          |          |
|-----------------|-----|---|-------|-------|--------------|------|----------|----------|
| novel mir693    | 397 | 0 | 13.52 | 0.001 | -13.72280753 | Down | 8.50E-91 | 3.18E-90 |
| novel mir552    | 395 | 0 | 13.45 | 0.001 | -13.71531855 | Down | 2.42E-90 | 8.99E-90 |
| novel mir472    | 393 | 0 | 13.38 | 0.001 | -13.7077905  | Down | 6.88E-90 | 2.55E-89 |
| novel mir469    | 392 | 0 | 13.35 | 0.001 | -13.70455212 | Down | 1.16E-89 | 4.28E-89 |
| mmu-miR-7002-5p | 391 | 0 | 13.32 | 0.001 | -13.70130646 | Down | 1.96E-89 | 7.20E-89 |
| novel mir49     | 389 | 0 | 13.25 | 0.001 | -13.69370474 | Down | 5.57E-89 | 2.03E-88 |
| novel mir432    | 387 | 0 | 13.18 | 0.001 | -13.68606275 | Down | 1.58E-88 | 5.75E-88 |
| novel mir448    | 386 | 0 | 13.15 | 0.001 | -13.68277518 | Down | 2.67E-88 | 9.67E-88 |
| novel mir204    | 384 | 0 | 13.08 | 0.001 | -13.67507492 | Down | 7.60E-88 | 2.73E-87 |
| novel mir680    | 383 | 0 | 13.04 | 0.001 | -13.67065625 | Down | 1.28E-87 | 4.59E-87 |
| novel mir638    | 381 | 0 | 12.98 | 0.001 | -13.66400276 | Down | 3.65E-87 | 1.30E-86 |
| novel mir551    | 380 | 0 | 12.94 | 0.001 | -13.65955    | Down | 6.16E-87 | 2.18E-86 |
| novel mir490    | 380 | 0 | 12.94 | 0.001 | -13.65955    | Down | 6.16E-87 | 2.17E-86 |
| mmu-miR-467b-5p | 377 | 0 | 12.84 | 0.001 | -13.64835758 | Down | 2.95E-86 | 1.03E-85 |
| novel mir386    | 376 | 0 | 12.8  | 0.001 | -13.64385619 | Down | 4.98E-86 | 1.73E-85 |
| novel mir69     | 376 | 0 | 12.8  | 0.001 | -13.64385619 | Down | 4.98E-86 | 1.73E-85 |
| mmu-miR-299b-3p | 366 | 0 | 12.46 | 0.001 | -13.60501645 | Down | 9.30E-84 | 3.18E-83 |
| novel mir617    | 365 | 0 | 12.43 | 0.001 | -13.60153868 | Down | 1.57E-83 | 5.35E-83 |
| novel mir275    | 362 | 0 | 12.33 | 0.001 | -13.58988518 | Down | 7.53E-83 | 2.55E-82 |
| novel mir274    | 362 | 0 | 12.33 | 0.001 | -13.58988518 | Down | 7.53E-83 | 2.54E-82 |
| novel mir241    | 360 | 0 | 12.26 | 0.001 | -13.58167136 | Down | 2.14E-82 | 7.19E-82 |
| novel mir260    | 359 | 0 | 12.23 | 0.001 | -13.57813678 | Down | 3.61E-82 | 1.21E-81 |
| mmu-miR-411-3p  | 357 | 0 | 12.16 | 0.001 | -13.56985561 | Down | 1.03E-81 | 3.43E-81 |
| novel mir213    | 351 | 0 | 11.95 | 0.001 | -13.544723   | Down | 2.37E-80 | 7.88E-80 |
| novel mir293    | 351 | 0 | 11.95 | 0.001 | -13.544723   | Down | 2.37E-80 | 7.85E-80 |
| novel mir418    | 349 | 0 | 11.89 | 0.001 | -13.53746109 | Down | 6.74E-80 | 2.23E-79 |
| novel mir554    | 348 | 0 | 11.85 | 0.001 | -13.53259944 | Down | 1.14E-79 | 3.75E-79 |
| novel mir481    | 348 | 0 | 11.85 | 0.001 | -13.53259944 | Down | 1.14E-79 | 3.73E-79 |
| novel mir350    | 347 | 0 | 11.82 | 0.001 | -13.52894242 | Down | 1.92E-79 | 6.26E-79 |
| novel mir476    | 345 | 0 | 11.75 | 0.001 | -13.52037314 | Down | 5.45E-79 | 1.78E-78 |
| novel mir235    | 345 | 0 | 11.75 | 0.001 | -13.52037314 | Down | 5.45E-79 | 1.77E-78 |
| novel mir344    | 343 | 0 | 11.68 | 0.001 | -13.51175265 | Down | 1.55E-78 | 5.02E-78 |
| novel mir176    | 342 | 0 | 11.65 | 0.001 | -13.50804233 | Down | 2.62E-78 | 8.45E-78 |
| novel mir607    | 342 | 0 | 11.65 | 0.001 | -13.50804233 | Down | 2.62E-78 | 8.42E-78 |
| novel mir573    | 341 | 0 | 11.61 | 0.001 | -13.50308035 | Down | 4.41E-78 | 1.42E-77 |
| mmu-miR-770-5p  | 339 | 0 | 11.54 | 0.001 | -13.4943556  | Down | 1.26E-77 | 4.01E-77 |

|                 |     |   |       |       |              |      |          |          |
|-----------------|-----|---|-------|-------|--------------|------|----------|----------|
| novel mir349    | 337 | 0 | 11.48 | 0.001 | -13.48683502 | Down | 3.57E-77 | 1.13E-76 |
| novel mir497    | 337 | 0 | 11.48 | 0.001 | -13.48683502 | Down | 3.57E-77 | 1.13E-76 |
| novel mir190    | 336 | 0 | 11.44 | 0.001 | -13.48179943 | Down | 6.03E-77 | 1.89E-76 |
| novel mir164    | 336 | 0 | 11.44 | 0.001 | -13.48179943 | Down | 6.03E-77 | 1.88E-76 |
| novel mir320    | 333 | 0 | 11.34 | 0.001 | -13.46913302 | Down | 2.89E-76 | 8.99E-76 |
| novel mir694    | 333 | 0 | 11.34 | 0.001 | -13.46913302 | Down | 2.89E-76 | 8.96E-76 |
| novel mir98     | 330 | 0 | 11.24 | 0.001 | -13.45635442 | Down | 1.39E-75 | 4.26E-75 |
| novel mir228    | 329 | 0 | 11.2  | 0.001 | -13.45121111 | Down | 2.34E-75 | 7.17E-75 |
| novel mir640    | 329 | 0 | 11.2  | 0.001 | -13.45121111 | Down | 2.34E-75 | 7.15E-75 |
| novel mir738    | 326 | 0 | 11.1  | 0.001 | -13.43827206 | Down | 1.12E-74 | 3.42E-74 |
| novel mir599    | 325 | 0 | 11.07 | 0.001 | -13.4343676  | Down | 1.90E-74 | 5.76E-74 |
| novel mir486    | 324 | 0 | 11.03 | 0.001 | -13.42914517 | Down | 3.20E-74 | 9.66E-74 |
| novel mir282    | 324 | 0 | 11.03 | 0.001 | -13.42914517 | Down | 3.20E-74 | 9.63E-74 |
| novel mir316    | 323 | 0 | 11    | 0.001 | -13.4252159  | Down | 5.40E-74 | 1.62E-73 |
| novel mir772    | 322 | 0 | 10.97 | 0.001 | -13.42127591 | Down | 9.10E-74 | 2.73E-73 |
| novel mir606    | 317 | 0 | 10.8  | 0.001 | -13.39874369 | Down | 1.24E-72 | 3.70E-72 |
| novel mir558    | 317 | 0 | 10.8  | 0.001 | -13.39874369 | Down | 1.24E-72 | 3.69E-72 |
| novel mir304    | 316 | 0 | 10.76 | 0.001 | -13.39339046 | Down | 2.10E-72 | 6.21E-72 |
| novel mir698    | 316 | 0 | 10.76 | 0.001 | -13.39339046 | Down | 2.10E-72 | 6.19E-72 |
| novel mir247    | 314 | 0 | 10.69 | 0.001 | -13.38397423 | Down | 5.97E-72 | 1.76E-71 |
| novel mir177    | 314 | 0 | 10.69 | 0.001 | -13.38397423 | Down | 5.97E-72 | 1.75E-71 |
| mmu-miR-6952-3p | 313 | 0 | 10.66 | 0.001 | -13.37991982 | Down | 1.01E-71 | 2.95E-71 |
| novel mir75     | 312 | 0 | 10.63 | 0.001 | -13.37585398 | Down | 1.70E-71 | 4.96E-71 |
| novel mir226    | 312 | 0 | 10.63 | 0.001 | -13.37585398 | Down | 1.70E-71 | 4.95E-71 |
| novel mir64     | 307 | 0 | 10.45 | 0.001 | -13.35121532 | Down | 2.32E-70 | 6.68E-70 |
| novel mir181    | 306 | 0 | 10.42 | 0.001 | -13.34706766 | Down | 3.91E-70 | 1.12E-69 |
| novel mir140    | 306 | 0 | 10.42 | 0.001 | -13.34706766 | Down | 3.91E-70 | 1.12E-69 |
| novel mir182    | 306 | 0 | 10.42 | 0.001 | -13.34706766 | Down | 3.91E-70 | 1.11E-69 |
| novel mir341    | 303 | 0 | 10.32 | 0.001 | -13.33315535 | Down | 1.88E-69 | 5.32E-69 |
| novel mir419    | 301 | 0 | 10.25 | 0.001 | -13.32333629 | Down | 5.34E-69 | 1.50E-68 |
| novel mir84     | 300 | 0 | 10.22 | 0.001 | -13.31910758 | Down | 9.01E-69 | 2.53E-68 |
| mmu-miR-6936-5p | 300 | 0 | 10.22 | 0.001 | -13.31910758 | Down | 9.01E-69 | 2.52E-68 |
| novel mir740    | 297 | 0 | 10.11 | 0.001 | -13.30349538 | Down | 4.32E-68 | 1.20E-67 |
| novel mir662    | 297 | 0 | 10.11 | 0.001 | -13.30349538 | Down | 4.32E-68 | 1.20E-67 |
| novel mir407    | 297 | 0 | 10.11 | 0.001 | -13.30349538 | Down | 4.32E-68 | 1.20E-67 |
| novel mir743    | 295 | 0 | 10.05 | 0.001 | -13.29490788 | Down | 1.23E-67 | 3.39E-67 |

|                 |     |   |      |       |              |      |          |          |
|-----------------|-----|---|------|-------|--------------|------|----------|----------|
| novel mir218    | 293 | 0 | 9.98 | 0.001 | -13.2848241  | Down | 3.50E-67 | 9.60E-67 |
| novel mir701    | 293 | 0 | 9.98 | 0.001 | -13.2848241  | Down | 3.50E-67 | 9.57E-67 |
| mmu-miR-182-3p  | 292 | 0 | 9.94 | 0.001 | -13.27903014 | Down | 5.90E-67 | 1.61E-66 |
| mmu-miR-363-5p  | 290 | 0 | 9.88 | 0.001 | -13.27029533 | Down | 1.68E-66 | 4.56E-66 |
| novel mir690    | 290 | 0 | 9.88 | 0.001 | -13.27029533 | Down | 1.68E-66 | 4.55E-66 |
| novel mir595    | 288 | 0 | 9.81 | 0.001 | -13.26003742 | Down | 4.78E-66 | 1.29E-65 |
| novel mir289    | 288 | 0 | 9.81 | 0.001 | -13.26003742 | Down | 4.78E-66 | 1.28E-65 |
| novel mir588    | 287 | 0 | 9.77 | 0.001 | -13.25414285 | Down | 8.06E-66 | 2.15E-65 |
| novel mir149    | 284 | 0 | 9.67 | 0.001 | -13.23930017 | Down | 3.87E-65 | 1.03E-64 |
| novel mir586    | 283 | 0 | 9.64 | 0.001 | -13.23481743 | Down | 6.53E-65 | 1.73E-64 |
| novel mir636    | 278 | 0 | 9.47 | 0.001 | -13.20914871 | Down | 8.91E-64 | 2.35E-63 |
| novel mir394    | 278 | 0 | 9.47 | 0.001 | -13.20914871 | Down | 8.91E-64 | 2.34E-63 |
| novel mir198    | 277 | 0 | 9.43 | 0.001 | -13.20304206 | Down | 1.50E-63 | 3.94E-63 |
| novel mir237    | 271 | 0 | 9.23 | 0.001 | -13.17211493 | Down | 3.46E-62 | 8.97E-62 |
| novel mir771    | 270 | 0 | 9.19 | 0.001 | -13.16584915 | Down | 5.84E-62 | 1.51E-61 |
| novel mir483    | 268 | 0 | 9.13 | 0.001 | -13.15639914 | Down | 1.66E-61 | 4.28E-61 |
| novel mir90     | 267 | 0 | 9.09 | 0.001 | -13.15006458 | Down | 2.80E-61 | 7.20E-61 |
| novel mir78     | 264 | 0 | 8.99 | 0.001 | -13.1341054  | Down | 1.35E-60 | 3.43E-60 |
| novel mir187    | 263 | 0 | 8.96 | 0.001 | -13.12928302 | Down | 2.27E-60 | 5.77E-60 |
| novel mir302    | 262 | 0 | 8.92 | 0.001 | -13.12282799 | Down | 3.83E-60 | 9.69E-60 |
| novel mir58     | 262 | 0 | 8.92 | 0.001 | -13.12282799 | Down | 3.83E-60 | 9.66E-60 |
| novel mir427    | 259 | 0 | 8.82 | 0.001 | -13.10656294 | Down | 1.84E-59 | 4.62E-59 |
| novel mir109    | 259 | 0 | 8.82 | 0.001 | -13.10656294 | Down | 1.84E-59 | 4.61E-59 |
| novel mir131    | 257 | 0 | 8.75 | 0.001 | -13.0950673  | Down | 5.23E-59 | 1.31E-58 |
| novel mir55     | 256 | 0 | 8.72 | 0.001 | -13.09011242 | Down | 8.82E-59 | 2.20E-58 |
| novel mir560    | 256 | 0 | 8.72 | 0.001 | -13.09011242 | Down | 8.82E-59 | 2.20E-58 |
| novel mir77     | 255 | 0 | 8.68 | 0.001 | -13.08347933 | Down | 1.49E-58 | 3.69E-58 |
| novel mir712    | 254 | 0 | 8.65 | 0.001 | -13.07848442 | Down | 2.51E-58 | 6.20E-58 |
| novel mir150    | 254 | 0 | 8.65 | 0.001 | -13.07848442 | Down | 2.51E-58 | 6.19E-58 |
| novel mir348    | 254 | 0 | 8.65 | 0.001 | -13.07848442 | Down | 2.51E-58 | 6.18E-58 |
| novel mir114    | 253 | 0 | 8.62 | 0.001 | -13.07347215 | Down | 4.23E-58 | 1.04E-57 |
| novel mir172    | 253 | 0 | 8.62 | 0.001 | -13.07347215 | Down | 4.23E-58 | 1.03E-57 |
| novel mir630    | 251 | 0 | 8.55 | 0.001 | -13.0617087  | Down | 1.20E-57 | 2.93E-57 |
| mmu-miR-6994-3p | 251 | 0 | 8.55 | 0.001 | -13.0617087  | Down | 1.20E-57 | 2.92E-57 |
| novel mir38     | 249 | 0 | 8.48 | 0.001 | -13.04984855 | Down | 3.43E-57 | 8.30E-57 |
| novel mir167    | 248 | 0 | 8.45 | 0.001 | -13.04473563 | Down | 5.78E-57 | 1.40E-56 |

|                 |     |   |      |       |              |      |          |          |
|-----------------|-----|---|------|-------|--------------|------|----------|----------|
| novel mir60     | 245 | 0 | 8.34 | 0.001 | -13.02583167 | Down | 2.77E-56 | 6.69E-56 |
| mmu-miR-3071-3p | 243 | 0 | 8.28 | 0.001 | -13.01541505 | Down | 7.89E-56 | 1.89E-55 |
| novel mir225    | 242 | 0 | 8.24 | 0.001 | -13.00842862 | Down | 1.33E-55 | 3.19E-55 |
| novel mir37     | 240 | 0 | 8.17 | 0.001 | -12.99612036 | Down | 3.79E-55 | 9.03E-55 |
| novel mir562    | 239 | 0 | 8.14 | 0.001 | -12.99081308 | Down | 6.39E-55 | 1.52E-54 |
| novel mir621    | 238 | 0 | 8.11 | 0.001 | -12.9854862  | Down | 1.08E-54 | 2.55E-54 |
| mmu-miR-292b-5p | 238 | 0 | 8.11 | 0.001 | -12.9854862  | Down | 1.08E-54 | 2.55E-54 |
| novel mir352    | 238 | 0 | 8.11 | 0.001 | -12.9854862  | Down | 1.08E-54 | 2.54E-54 |
| novel mir249    | 237 | 0 | 8.07 | 0.001 | -12.97835296 | Down | 1.82E-54 | 4.27E-54 |
| novel mir717    | 236 | 0 | 8.04 | 0.001 | -12.97297979 | Down | 3.07E-54 | 7.19E-54 |
| novel mir145    | 236 | 0 | 8.04 | 0.001 | -12.97297979 | Down | 3.07E-54 | 7.17E-54 |
| novel mir268    | 235 | 0 | 8    | 0.001 | -12.96578428 | Down | 5.17E-54 | 1.20E-53 |
| novel mir205    | 235 | 0 | 8    | 0.001 | -12.96578428 | Down | 5.17E-54 | 1.20E-53 |
| novel mir757    | 235 | 0 | 8    | 0.001 | -12.96578428 | Down | 5.17E-54 | 1.20E-53 |
| novel mir343    | 234 | 0 | 7.97 | 0.001 | -12.96036401 | Down | 8.73E-54 | 2.02E-53 |
| novel mir332    | 229 | 0 | 7.8  | 0.001 | -12.92925841 | Down | 1.19E-52 | 2.72E-52 |
| novel mir166    | 227 | 0 | 7.73 | 0.001 | -12.9162527  | Down | 3.39E-52 | 7.69E-52 |
| novel mir689    | 226 | 0 | 7.7  | 0.001 | -12.91064273 | Down | 5.72E-52 | 1.30E-51 |
| mmu-miR-6953-3p | 226 | 0 | 7.7  | 0.001 | -12.91064273 | Down | 5.72E-52 | 1.29E-51 |
| novel mir360    | 221 | 0 | 7.53 | 0.001 | -12.87843415 | Down | 7.81E-51 | 1.75E-50 |
| novel mir261    | 220 | 0 | 7.49 | 0.001 | -12.87075    | Down | 1.32E-50 | 2.94E-50 |
| novel mir510    | 218 | 0 | 7.42 | 0.001 | -12.85720347 | Down | 3.75E-50 | 8.35E-50 |
| mmu-miR-7681-5p | 215 | 0 | 7.32 | 0.001 | -12.83762793 | Down | 1.80E-49 | 3.99E-49 |
| novel mir143    | 215 | 0 | 7.32 | 0.001 | -12.83762793 | Down | 1.80E-49 | 3.98E-49 |
| novel mir745    | 215 | 0 | 7.32 | 0.001 | -12.83762793 | Down | 1.80E-49 | 3.97E-49 |
| novel mir27     | 213 | 0 | 7.25 | 0.001 | -12.82376528 | Down | 5.12E-49 | 1.12E-48 |
| novel mir511    | 210 | 0 | 7.15 | 0.001 | -12.80372753 | Down | 2.46E-48 | 5.35E-48 |
| novel mir87     | 209 | 0 | 7.12 | 0.001 | -12.79766153 | Down | 4.14E-48 | 8.97E-48 |
| novel mir323    | 207 | 0 | 7.05 | 0.001 | -12.78340754 | Down | 1.18E-47 | 2.54E-47 |
| novel mir436    | 206 | 0 | 7.02 | 0.001 | -12.77725532 | Down | 1.99E-47 | 4.28E-47 |
| novel mir134    | 206 | 0 | 7.02 | 0.001 | -12.77725532 | Down | 1.99E-47 | 4.27E-47 |
| mmu-miR-764-5p  | 205 | 0 | 6.98 | 0.001 | -12.76901132 | Down | 3.35E-47 | 7.19E-47 |
| mmu-miR-154-3p  | 204 | 0 | 6.95 | 0.001 | -12.76279726 | Down | 5.66E-47 | 1.21E-46 |
| novel mir223    | 201 | 0 | 6.85 | 0.001 | -12.74188827 | Down | 2.72E-46 | 5.78E-46 |
| novel mir210    | 200 | 0 | 6.81 | 0.001 | -12.73343908 | Down | 4.58E-46 | 9.70E-46 |
| novel mir532    | 199 | 0 | 6.78 | 0.001 | -12.72706956 | Down | 7.73E-46 | 1.63E-45 |

|                 |     |   |      |       |              |      |          |          |
|-----------------|-----|---|------|-------|--------------|------|----------|----------|
| novel mir382    | 196 | 0 | 6.67 | 0.001 | -12.70347105 | Down | 3.71E-45 | 7.78E-45 |
| novel mir463    | 193 | 0 | 6.57 | 0.001 | -12.68167766 | Down | 1.78E-44 | 3.70E-44 |
| novel mir81     | 189 | 0 | 6.44 | 0.001 | -12.65284497 | Down | 1.44E-43 | 2.98E-43 |
| novel mir165    | 189 | 0 | 6.44 | 0.001 | -12.65284497 | Down | 1.44E-43 | 2.98E-43 |
| novel mir59     | 181 | 0 | 6.16 | 0.001 | -12.58871464 | Down | 9.45E-42 | 1.93E-41 |
| novel mir438    | 179 | 0 | 6.1  | 0.001 | -12.57459353 | Down | 2.69E-41 | 5.47E-41 |
| novel mir564    | 179 | 0 | 6.1  | 0.001 | -12.57459353 | Down | 2.69E-41 | 5.46E-41 |
| novel mir85     | 179 | 0 | 6.1  | 0.001 | -12.57459353 | Down | 2.69E-41 | 5.45E-41 |
| novel mir207    | 175 | 0 | 5.96 | 0.001 | -12.54109662 | Down | 2.18E-40 | 4.38E-40 |
| novel mir627    | 175 | 0 | 5.96 | 0.001 | -12.54109662 | Down | 2.18E-40 | 4.38E-40 |
| novel mir412    | 173 | 0 | 5.89 | 0.001 | -12.52405192 | Down | 6.19E-40 | 1.24E-39 |
| novel mir220    | 173 | 0 | 5.89 | 0.001 | -12.52405192 | Down | 6.19E-40 | 1.24E-39 |
| novel mir505    | 173 | 0 | 5.89 | 0.001 | -12.52405192 | Down | 6.19E-40 | 1.23E-39 |
| novel mir732    | 165 | 0 | 5.62 | 0.001 | -12.45635442 | Down | 4.06E-38 | 8.01E-38 |
| novel mir667    | 164 | 0 | 5.59 | 0.001 | -12.44863257 | Down | 6.84E-38 | 1.35E-37 |
| novel mir203    | 161 | 0 | 5.48 | 0.001 | -12.41996018 | Down | 3.28E-37 | 6.43E-37 |
| novel mir535    | 157 | 0 | 5.35 | 0.001 | -12.38532318 | Down | 2.66E-36 | 5.17E-36 |
| novel mir318    | 156 | 0 | 5.31 | 0.001 | -12.37449615 | Down | 4.49E-36 | 8.70E-36 |
| novel mir61     | 156 | 0 | 5.31 | 0.001 | -12.37449615 | Down | 4.49E-36 | 8.68E-36 |
| novel mir538    | 154 | 0 | 5.24 | 0.001 | -12.3553511  | Down | 1.28E-35 | 2.47E-35 |
| novel mir127    | 144 | 0 | 4.9  | 0.001 | -12.25856603 | Down | 2.38E-33 | 4.49E-33 |
| novel mir625    | 143 | 0 | 4.87 | 0.001 | -12.24970606 | Down | 4.02E-33 | 7.57E-33 |
| novel mir159    | 141 | 0 | 4.8  | 0.001 | -12.22881869 | Down | 1.14E-32 | 2.15E-32 |
| novel mir222    | 139 | 0 | 4.73 | 0.001 | -12.20762447 | Down | 3.25E-32 | 6.07E-32 |
| mmu-miR-7034-3p | 138 | 0 | 4.7  | 0.001 | -12.19844504 | Down | 5.48E-32 | 1.02E-31 |
| novel mir267    | 135 | 0 | 4.6  | 0.001 | -12.16741815 | Down | 2.63E-31 | 4.89E-31 |
| novel mir527    | 125 | 0 | 4.26 | 0.001 | -12.05663772 | Down | 4.91E-29 | 9.01E-29 |
| novel mir212    | 123 | 0 | 4.19 | 0.001 | -12.03273453 | Down | 1.40E-28 | 2.54E-28 |
| novel mir447    | 123 | 0 | 4.19 | 0.001 | -12.03273453 | Down | 1.40E-28 | 2.54E-28 |
| novel mir216    | 122 | 0 | 4.15 | 0.001 | -12.01889562 | Down | 2.36E-28 | 4.27E-28 |
| novel mir313    | 116 | 0 | 3.95 | 0.001 | -11.94763694 | Down | 5.43E-27 | 9.72E-27 |
| novel mir53     | 115 | 0 | 3.92 | 0.001 | -11.93663794 | Down | 9.15E-27 | 1.63E-26 |
| novel mir610    | 108 | 0 | 3.68 | 0.001 | -11.84549005 | Down | 3.56E-25 | 6.27E-25 |
| novel mir695    | 103 | 0 | 3.51 | 0.001 | -11.77725532 | Down | 4.86E-24 | 8.47E-24 |
| novel mir329    | 99  | 0 | 3.37 | 0.001 | -11.71853288 | Down | 3.93E-23 | 6.76E-23 |
| mmu-miR-7058-3p | 95  | 0 | 3.24 | 0.001 | -11.6617781  | Down | 3.18E-22 | 5.43E-22 |



|                  |      |    |        |       |              |      |           |           |
|------------------|------|----|--------|-------|--------------|------|-----------|-----------|
| novel mir754     | 94   | 0  | 3.2    | 0.001 | -11.64385619 | Down | 5.37E-22  | 9.13E-22  |
| novel mir283     | 90   | 0  | 3.06   | 0.001 | -11.57931594 | Down | 4.35E-21  | 7.32E-21  |
| novel mir659     | 88   | 0  | 3      | 0.001 | -11.55074679 | Down | 1.24E-20  | 2.07E-20  |
| novel mir647     | 84   | 0  | 2.86   | 0.001 | -11.48179943 | Down | 1.00E-19  | 1.65E-19  |
| novel mir420     | 79   | 0  | 2.69   | 0.001 | -11.39339046 | Down | 1.37E-18  | 2.23E-18  |
| novel mir658     | 76   | 0  | 2.59   | 0.001 | -11.33873638 | Down | 6.56E-18  | 1.06E-17  |
| mmu-miR-6901-3p  | 55   | 0  | 1.87   | 0.001 | -10.86882255 | Down | 3.85E-13  | 5.93E-13  |
| novel mir231     | 50   | 0  | 1.7    | 0.001 | -10.73131903 | Down | 5.26E-12  | 7.90E-12  |
| novel mir91      | 38   | 0  | 1.29   | 0.001 | -10.33315535 | Down | 2.79E-09  | 3.96E-09  |
| mmu-miR-335-3p   | 1821 | 1  | 62.01  | 0.05  | -10.27635708 | Down | 0         | 0         |
| mmu-miR-1249-3p  | 1709 | 1  | 58.2   | 0.05  | -10.18487534 | Down | 0         | 0         |
| novel mir200     | 34   | 0  | 1.16   | 0.001 | -10.17990909 | Down | 2.26E-08  | 3.17E-08  |
| novel mir265     | 24   | 0  | 0.82   | 0.001 | -9.6794801   | Down | 4.21E-06  | 5.41E-06  |
| novel mir73      | 23   | 0  | 0.78   | 0.001 | -9.607330314 | Down | 7.10E-06  | 8.95E-06  |
| mmu-miR-363-3p   | 562  | 1  | 19.14  | 0.05  | -8.58044702  | Down | 6.69E-126 | 3.22E-125 |
| mmu-miR-98-3p    | 321  | 1  | 10.93  | 0.05  | -7.772149591 | Down | 2.03E-71  | 5.89E-71  |
| mmu-miR-214-3p   | 3450 | 13 | 117.49 | 0.64  | -7.520250349 | Down | 0         | 0         |
| mmu-miR-485-3p   | 1118 | 5  | 38.07  | 0.25  | -7.250582665 | Down | 2.74E-243 | 1.75E-242 |
| mmu-miR-466d-3p  | 619  | 3  | 21.08  | 0.15  | -7.134768556 | Down | 9.05E-135 | 4.60E-134 |
| mmu-let-7b-3p    | 4824 | 25 | 164.28 | 1.24  | -7.049672922 | Down | 0         | 0         |
| mmu-miR-7658-5p  | 386  | 2  | 13.15  | 0.1   | -7.038918989 | Down | 3.37E-84  | 1.16E-83  |
| mmu-miR-466k     | 531  | 3  | 18.08  | 0.15  | -6.913288367 | Down | 5.49E-115 | 2.51E-114 |
| mmu-miR-10a-3p   | 497  | 3  | 16.93  | 0.15  | -6.818475662 | Down | 2.37E-107 | 1.03E-106 |
| mmu-miR-8091     | 249  | 2  | 8.48   | 0.1   | -6.40599236  | Down | 1.82E-53  | 4.20E-53  |
| mmu-miR-365-3p   | 2080 | 17 | 70.84  | 0.84  | -6.398031074 | Down | 0         | 0         |
| mmu-miR-7030-3p  | 247  | 2  | 8.41   | 0.1   | -6.394033895 | Down | 5.09E-53  | 1.17E-52  |
| mmu-miR-342-5p   | 703  | 6  | 23.94  | 0.3   | -6.318316841 | Down | 2.25E-148 | 1.18E-147 |
| mmu-miR-16-2-3p  | 819  | 8  | 27.89  | 0.4   | -6.123604124 | Down | 5.20E-171 | 2.94E-170 |
| mmu-miR-664-3p   | 7023 | 73 | 239.17 | 3.62  | -6.045902931 | Down | 0         | 0         |
| mmu-miR-211-5p   | 969  | 11 | 33     | 0.55  | -5.906890596 | Down | 1.11E-199 | 6.65E-199 |
| mmu-miR-296-5p   | 352  | 4  | 11.99  | 0.2   | -5.905687849 | Down | 2.61E-73  | 7.79E-73  |
| mmu-miR-7658-3p  | 958  | 11 | 32.62  | 0.55  | -5.890181353 | Down | 3.09E-197 | 1.84E-196 |
| mmu-miR-136-3p   | 254  | 3  | 8.65   | 0.15  | -5.849665727 | Down | 4.87E-53  | 1.12E-52  |
| mmu-miR-669c-5p  | 2122 | 26 | 72.27  | 1.29  | -5.807953924 | Down | 0         | 0         |
| mmu-miR-122-3p   | 1028 | 13 | 35.01  | 0.64  | -5.773551346 | Down | 9.81E-210 | 6.04E-209 |
| mmu-miR-29b-1-5p | 618  | 8  | 21.05  | 0.4   | -5.717676423 | Down | 2.44E-126 | 1.18E-125 |

|                 |        |       |          |        |              |      |           |           |
|-----------------|--------|-------|----------|--------|--------------|------|-----------|-----------|
| mmu-miR-871-5p  | 306    | 4     | 10.42    | 0.2    | -5.703211467 | Down | 4.19E-63  | 1.10E-62  |
| mmu-miR-1981-3p | 1371   | 19    | 46.69    | 0.94   | -5.634309022 | Down | 8.85E-277 | 6.12E-276 |
| mmu-miR-3473g   | 429    | 6     | 14.61    | 0.3    | -5.605849867 | Down | 1.97E-87  | 7.04E-87  |
| mmu-miR-495-3p  | 1555   | 22    | 52.96    | 1.09   | -5.602503082 | Down | 0         | 0         |
| mmu-miR-18a-5p  | 2295   | 33    | 78.16    | 1.64   | -5.574662747 | Down | 0         | 0         |
| mmu-miR-1b-5p   | 1922   | 28    | 65.45    | 1.39   | -5.557236404 | Down | 0         | 0         |
| mmu-miR-466h-3p | 6225   | 91    | 211.99   | 4.51   | -5.554724968 | Down | 0         | 0         |
| mmu-miR-6960-5p | 951    | 14    | 32.39    | 0.69   | -5.552808296 | Down | 3.09E-191 | 1.80E-190 |
| mmu-miR-125b-5p | 28523  | 419   | 971.36   | 20.78  | -5.546738519 | Down | 0         | 0         |
| mmu-miR-101b-3p | 2311   | 34    | 78.7     | 1.69   | -5.541268484 | Down | 0         | 0         |
| mmu-miR-770-3p  | 665    | 10    | 22.65    | 0.5    | -5.501439145 | Down | 7.83E-134 | 3.94E-133 |
| mmu-miR-669o-3p | 522    | 8     | 17.78    | 0.4    | -5.474111514 | Down | 4.04E-105 | 1.71E-104 |
| mmu-let-7c-5p   | 693066 | 10730 | 23602.57 | 532.05 | -5.471238317 | Down | 0         | 0         |
| mmu-miR-6955-3p | 127    | 2     | 4.33     | 0.1    | -5.43629512  | Down | 2.45E-26  | 4.37E-26  |
| mmu-miR-23b-5p  | 2841   | 47    | 96.75    | 2.33   | -5.375859801 | Down | 0         | 0         |
| novel mir41     | 962    | 17    | 32.76    | 0.84   | -5.285402219 | Down | 1.80E-189 | 1.04E-188 |
| mmu-miR-26b-3p  | 832    | 15    | 28.33    | 0.74   | -5.258661521 | Down | 1.17E-163 | 6.49E-163 |
| mmu-miR-1982-3p | 166    | 3     | 5.65     | 0.15   | -5.235216462 | Down | 1.34E-33  | 2.54E-33  |
| mmu-miR-574-3p  | 57274  | 1046  | 1950.48  | 51.87  | -5.232785025 | Down | 0         | 0         |
| mmu-miR-450b-5p | 385    | 7     | 13.11    | 0.35   | -5.227168953 | Down | 2.34E-76  | 7.29E-76  |
| mmu-miR-10b-5p  | 56638  | 1110  | 1928.82  | 55.04  | -5.131094235 | Down | 0         | 0         |
| mmu-miR-450a-5p | 2033   | 40    | 69.23    | 1.98   | -5.127825013 | Down | 0         | 0         |
| mmu-let-7f-1-3p | 8696   | 178   | 296.14   | 8.83   | -5.067722122 | Down | 0         | 0         |
| mmu-miR-125a-5p | 47302  | 985   | 1610.88  | 48.84  | -5.043642016 | Down | 0         | 0         |
| mmu-miR-30c-5p  | 4172   | 87    | 142.08   | 4.31   | -5.042871807 | Down | 0         | 0         |
| novel mir580    | 529    | 11    | 18.02    | 0.55   | -5.034023582 | Down | 1.25E-102 | 5.16E-102 |
| mmu-miR-7021-5p | 470    | 10    | 16.01    | 0.5    | -5.000901403 | Down | 4.85E-91  | 1.83E-90  |
| mmu-let-7b-5p   | 450255 | 9887  | 15333.57 | 490.25 | -4.967032187 | Down | 0         | 0         |
| novel mir141    | 836    | 19    | 28.47    | 0.94   | -4.920637926 | Down | 2.47E-159 | 1.34E-158 |
| mmu-miR-190b-5p | 522    | 12    | 17.78    | 0.6    | -4.889149013 | Down | 7.66E-100 | 3.09E-99  |
| mmu-miR-98-5p   | 20797  | 487   | 708.25   | 24.15  | -4.874163602 | Down | 0         | 0         |
| mmu-let-7f-5p   | 150494 | 3545  | 5125.12  | 175.78 | -4.865742947 | Down | 0         | 0         |
| mmu-let-7g-5p   | 583994 | 14179 | 19888.09 | 703.07 | -4.822092584 | Down | 0         | 0         |
| mmu-miR-181d-3p | 285    | 7     | 9.71     | 0.35   | -4.794044468 | Down | 1.51E-54  | 3.55E-54  |
| mmu-miR-6899-3p | 197    | 5     | 6.71     | 0.25   | -4.746312766 | Down | 6.98E-38  | 1.37E-37  |
| mmu-miR-10a-5p  | 172002 | 4430  | 5857.58  | 219.66 | -4.736960668 | Down | 0         | 0         |

|                   |        |       |          |         |              |      |           |           |
|-------------------|--------|-------|----------|---------|--------------|------|-----------|-----------|
| mmu-miR-669f-3p   | 234    | 6     | 7.97     | 0.3     | -4.731545318 | Down | 1.05E-44  | 2.21E-44  |
| mmu-miR-92b-3p    | 13554  | 351   | 461.59   | 17.4    | -4.729452758 | Down | 0         | 0         |
| mmu-miR-329-3p    | 1079   | 28    | 36.75    | 1.39    | -4.724587462 | Down | 5.95E-201 | 3.59E-200 |
| mmu-let-7a-5p     | 212506 | 5626  | 7236.96  | 278.97  | -4.697201907 | Down | 0         | 0         |
| mmu-miR-106b-3p   | 1160   | 31    | 39.5     | 1.54    | -4.680850397 | Down | 7.54E-215 | 4.73E-214 |
| mmu-miR-543-3p    | 1410   | 40    | 48.02    | 1.98    | -4.600063068 | Down | 4.38E-258 | 2.89E-257 |
| mmu-miR-19b-3p    | 17318  | 498   | 589.77   | 24.69   | -4.578153697 | Down | 0         | 0         |
| mmu-miR-1843a-5p  | 3545   | 103   | 120.73   | 5.11    | -4.562317112 | Down | 0         | 0         |
| mmu-miR-199b-3p   | 419760 | 12600 | 14295.05 | 624.77  | -4.516046676 | Down | 0         | 0         |
| mmu-miR-124-3p    | 1460   | 44    | 49.72    | 2.18    | -4.511426256 | Down | 3.31E-264 | 2.22E-263 |
| mmu-let-7d-3p     | 829655 | 25169 | 28254.15 | 1248.01 | -4.500761388 | Down | 0         | 0         |
| mmu-miR-219a-1-3p | 655    | 20    | 22.31    | 0.99    | -4.494118178 | Down | 4.48E-119 | 2.12E-118 |
| mmu-miR-410-3p    | 2887   | 89    | 98.32    | 4.41    | -4.478634355 | Down | 0         | 0         |
| mmu-miR-1843a-3p  | 3360   | 105   | 114.43   | 5.21    | -4.457038149 | Down | 0         | 0         |
| mmu-miR-466i-5p   | 3069   | 96    | 104.52   | 4.76    | -4.456673646 | Down | 0         | 0         |
| mmu-miR-1a-3p     | 3691   | 118   | 125.7    | 5.85    | -4.425404215 | Down | 0         | 0         |
| mmu-miR-18a-3p    | 1002   | 32    | 34.12    | 1.59    | -4.423518976 | Down | 8.63E-180 | 4.92E-179 |
| mmu-miR-148b-3p   | 669    | 22    | 22.78    | 1.09    | -4.385367707 | Down | 7.74E-120 | 3.68E-119 |
| mmu-miR-199a-3p   | 5439   | 191   | 185.23   | 9.47    | -4.289809542 | Down | 0         | 0         |
| mmu-let-7d-5p     | 88588  | 3114  | 3016.89  | 154.41  | -4.288224001 | Down | 0         | 0         |
| mmu-miR-877-3p    | 1440   | 51    | 49.04    | 2.53    | -4.276749689 | Down | 3.30E-252 | 2.15E-251 |
| novel mir3        | 504    | 18    | 17.16    | 0.89    | -4.269100407 | Down | 4.27E-89  | 1.57E-88  |
| mmu-miR-126a-5p   | 2565   | 92    | 87.35    | 4.56    | -4.259701974 | Down | 0         | 0         |
| mmu-miR-381-3p    | 222    | 8     | 7.56     | 0.4     | -4.240314329 | Down | 6.56E-40  | 1.30E-39  |
| mmu-miR-142a-5p   | 1952   | 71    | 66.48    | 3.52    | -4.239273048 | Down | 0         | 0         |
| mmu-miR-134-3p    | 375    | 14    | 12.77    | 0.69    | -4.210018353 | Down | 5.22E-66  | 1.40E-65  |
| mmu-miR-1306-5p   | 3075   | 115   | 104.72   | 5.7     | -4.199431273 | Down | 0         | 0         |
| mmu-miR-29a-5p    | 357    | 14    | 12.16    | 0.69    | -4.139403057 | Down | 3.26E-62  | 8.47E-62  |
| mmu-miR-9-5p      | 205    | 8     | 6.98     | 0.4     | -4.125155131 | Down | 2.56E-36  | 4.99E-36  |
| mmu-miR-222-3p    | 42054  | 1686  | 1432.16  | 83.6    | -4.098545926 | Down | 0         | 0         |
| mmu-miR-144-3p    | 9264   | 374   | 315.49   | 18.54   | -4.088881128 | Down | 0         | 0         |
| mmu-miR-3058-3p   | 393    | 16    | 13.38    | 0.79    | -4.082081652 | Down | 9.45E-68  | 2.61E-67  |
| mmu-miR-26b-5p    | 12288  | 505   | 418.47   | 25.04   | -4.062817733 | Down | 0         | 0         |
| mmu-miR-199a-5p   | 294    | 12    | 10.01    | 0.6     | -4.060335663 | Down | 5.38E-51  | 1.21E-50  |
| mmu-miR-204-5p    | 40468  | 1684  | 1378.15  | 83.5    | -4.044812914 | Down | 0         | 0         |
| novel mir354      | 406    | 17    | 13.83    | 0.84    | -4.041268018 | Down | 1.79E-69  | 5.08E-69  |

|                      |        |       |          |         |              |      |           |           |
|----------------------|--------|-------|----------|---------|--------------|------|-----------|-----------|
| mmu-miR-467a-5p      | 2002   | 85    | 68.18    | 4.21    | -4.017456461 | Down | 0         | 0         |
| mmu-miR-210-3p       | 1358   | 58    | 46.25    | 2.88    | -4.005312649 | Down | 1.02E-227 | 6.44E-227 |
| mmu-miR-6948-3p      | 514    | 22    | 17.5     | 1.09    | -4.004954882 | Down | 4.21E-87  | 1.49E-86  |
| mmu-miR-3077-3p      | 281    | 12    | 9.57     | 0.6     | -3.995484519 | Down | 2.85E-48  | 6.19E-48  |
| mmu-miR-30b-5p       | 5056   | 235   | 172.18   | 11.65   | -3.885515713 | Down | 0         | 0         |
| mmu-miR-574-5p       | 8937   | 416   | 304.35   | 20.63   | -3.882915639 | Down | 0         | 0         |
| mmu-miR-467e-5p      | 173    | 8     | 5.89     | 0.4     | -3.880195729 | Down | 1.28E-29  | 2.37E-29  |
| mmu-miR-450b-3p      | 274    | 13    | 9.33     | 0.64    | -3.865733271 | Down | 7.49E-46  | 1.58E-45  |
| mmu-miR-335-5p       | 308    | 15    | 10.49    | 0.74    | -3.825345597 | Down | 5.19E-51  | 1.16E-50  |
| mmu-miR-7043-3p      | 682    | 33    | 23.23    | 1.64    | -3.824221434 | Down | 2.08E-111 | 9.15E-111 |
| mmu-miR-466f-3p      | 692    | 34    | 23.57    | 1.69    | -3.801856607 | Down | 1.55E-112 | 6.91E-112 |
| mmu-miR-434-3p       | 6211   | 306   | 211.52   | 15.17   | -3.801501091 | Down | 0         | 0         |
| novel mir773         | 465    | 23    | 15.84    | 1.14    | -3.796466606 | Down | 5.74E-76  | 1.77E-75  |
| mmu-miR-19a-3p       | 322    | 16    | 10.97    | 0.79    | -3.795567062 | Down | 5.68E-53  | 1.30E-52  |
| mmu-miR-6956-3p      | 301    | 15    | 10.25    | 0.74    | -3.791954829 | Down | 1.44E-49  | 3.21E-49  |
| mmu-miR-467d-5p      | 357    | 18    | 12.16    | 0.89    | -3.772194082 | Down | 2.44E-58  | 6.05E-58  |
| mmu-miR-484          | 326990 | 16685 | 11135.74 | 827.33  | -3.750590725 | Down | 0         | 0         |
| mmu-miR-1306-3p      | 2633   | 136   | 89.67    | 6.74    | -3.733804901 | Down | 0         | 0         |
| novel mir642         | 195    | 10    | 6.64     | 0.5     | -3.731183242 | Down | 2.57E-32  | 4.81E-32  |
| mmu-miR-152-3p       | 385    | 20    | 13.11    | 0.99    | -3.72709535  | Down | 2.89E-62  | 7.53E-62  |
| mmu-miR-466g         | 345    | 18    | 11.75    | 0.89    | -3.72271161  | Down | 7.15E-56  | 1.72E-55  |
| mmu-miR-200b-3p      | 722    | 38    | 24.59    | 1.88    | -3.709267168 | Down | 5.07E-115 | 2.33E-114 |
| mmu-miR-615-3p       | 894    | 48    | 30.45    | 2.38    | -3.677408749 | Down | 3.44E-141 | 1.77E-140 |
| mmu-miR-345-5p       | 206    | 11    | 7.02     | 0.55    | -3.673967507 | Down | 1.12E-33  | 2.13E-33  |
| mmu-let-7i-5p        | 632649 | 34070 | 21545.05 | 1689.37 | -3.672799205 | Down | 0         | 0         |
| mmu-miR-127-3p       | 91586  | 5018  | 3118.99  | 248.82  | -3.647904569 | Down | 0         | 0         |
| novel mir590         | 345    | 19    | 11.75    | 0.94    | -3.64385619  | Down | 5.62E-55  | 1.34E-54  |
| mmu-miR-3102-5p.2-5p | 470    | 26    | 16.01    | 1.29    | -3.633530337 | Down | 2.85E-74  | 8.62E-74  |
| mmu-miR-22-3p        | 649510 | 36222 | 22119.26 | 1796.07 | -3.622387637 | Down | 0         | 0         |
| mmu-miR-29c-3p       | 1699   | 95    | 57.86    | 4.71    | -3.618767358 | Down | 1.90E-263 | 1.26E-262 |
| mmu-miR-215-5p       | 9705   | 547   | 330.51   | 27.12   | -3.607264839 | Down | 0         | 0         |
| mmu-miR-297a-5p      | 1216   | 69    | 41.41    | 3.42    | -3.597910972 | Down | 3.73E-188 | 2.15E-187 |
| novel mir619         | 529    | 30    | 18.02    | 1.49    | -3.596214775 | Down | 9.24E-83  | 3.11E-82  |
| mmu-miR-421-3p       | 493    | 28    | 16.79    | 1.39    | -3.594445442 | Down | 3.41E-77  | 1.08E-76  |
| mmu-miR-100-5p       | 10567  | 605   | 359.86   | 30      | -3.584401344 | Down | 0         | 0         |
| mmu-miR-433-3p       | 741    | 43    | 25.23    | 2.13    | -3.566214871 | Down | 1.85E-114 | 8.37E-114 |

|                  |        |       |         |        |              |      |           |           |
|------------------|--------|-------|---------|--------|--------------|------|-----------|-----------|
| mmu-miR-186-5p   | 978    | 57    | 33.31   | 2.83   | -3.557081396 | Down | 2.43E-150 | 1.29E-149 |
| mmu-miR-382-5p   | 7802   | 467   | 265.7   | 23.16  | -3.520091069 | Down | 0         | 0         |
| mmu-miR-1191a    | 2116   | 127   | 72.06   | 6.3    | -3.515774918 | Down | 0         | 0         |
| mmu-miR-300-3p   | 247    | 15    | 8.41    | 0.74   | -3.506508625 | Down | 1.52E-38  | 3.00E-38  |
| mmu-miR-126a-3p  | 16986  | 1049  | 578.46  | 52.01  | -3.475356259 | Down | 0         | 0         |
| mmu-miR-369-5p   | 13132  | 815   | 447.21  | 40.41  | -3.468168192 | Down | 0         | 0         |
| mmu-miR-350-3p   | 6146   | 384   | 209.3   | 19.04  | -3.458466928 | Down | 0         | 0         |
| mmu-miR-193b-5p  | 334    | 21    | 11.37   | 1.04   | -3.450576821 | Down | 4.92E-51  | 1.11E-50  |
| mmu-miR-361-5p   | 3892   | 246   | 132.54  | 12.2   | -3.441474772 | Down | 0         | 0         |
| novel mir240     | 188    | 12    | 6.4     | 0.6    | -3.415037499 | Down | 3.61E-29  | 6.65E-29  |
| mmu-miR-30e-3p   | 1726   | 112   | 58.78   | 5.55   | -3.404765682 | Down | 2.17E-254 | 1.43E-253 |
| novel mir103     | 416    | 27    | 14.17   | 1.34   | -3.402534852 | Down | 1.63E-62  | 4.27E-62  |
| mmu-miR-6943-3p  | 467    | 31    | 15.9    | 1.54   | -3.368024509 | Down | 1.97E-69  | 5.57E-69  |
| mmu-miR-5100     | 329    | 22    | 11.2    | 1.09   | -3.361098692 | Down | 3.24E-49  | 7.15E-49  |
| novel mir722     | 445    | 30    | 15.15   | 1.49   | -3.345933558 | Down | 7.36E-66  | 1.97E-65  |
| mmu-miR-1843b-5p | 691    | 47    | 23.53   | 2.33   | -3.336099461 | Down | 4.37E-101 | 1.80E-100 |
| mmu-miR-8107     | 484    | 33    | 16.48   | 1.64   | -3.328948523 | Down | 3.34E-71  | 9.68E-71  |
| mmu-miR-183-5p   | 6526   | 448   | 222.24  | 22.21  | -3.322837206 | Down | 0         | 0         |
| mmu-miR-669b-5p  | 2447   | 170   | 83.33   | 8.43   | -3.305231444 | Down | 0         | 0         |
| mmu-miR-106b-5p  | 1730   | 122   | 58.92   | 6.05   | -3.283750383 | Down | 4.05E-247 | 2.63E-246 |
| mmu-miR-34b-3p   | 1882   | 134   | 64.09   | 6.64   | -3.270844123 | Down | 1.16E-267 | 7.79E-267 |
| mmu-miR-122-5p   | 219616 | 16164 | 7479.09 | 801.49 | -3.222106319 | Down | 0         | 0         |
| mmu-miR-340-5p   | 622    | 46    | 21.18   | 2.28   | -3.21559686  | Down | 3.02E-88  | 1.09E-87  |
| mmu-miR-15b-5p   | 7680   | 580   | 261.54  | 28.76  | -3.184896029 | Down | 0         | 0         |
| mmu-miR-15b-3p   | 3374   | 255   | 114.9   | 12.64  | -3.184310429 | Down | 0         | 0         |
| mmu-miR-30e-5p   | 659    | 50    | 22.44   | 2.48   | -3.17766065  | Down | 1.95E-92  | 7.48E-92  |
| mmu-miR-337-5p   | 340    | 26    | 11.58   | 1.29   | -3.166192283 | Down | 2.87E-48  | 6.23E-48  |
| mmu-miR-339-3p   | 1973   | 151   | 67.19   | 7.49   | -3.165208906 | Down | 2.12E-272 | 1.45E-271 |
| mmu-miR-143-3p   | 42639  | 3312  | 1452.08 | 164.23 | -3.144331344 | Down | 0         | 0         |
| mmu-miR-32-5p    | 976    | 76    | 33.24   | 3.77   | -3.140283954 | Down | 1.20E-134 | 6.05E-134 |
| mmu-miR-103-3p   | 467    | 37    | 15.9    | 1.83   | -3.119111212 | Down | 8.81E-65  | 2.33E-64  |
| mmu-miR-434-5p   | 1009   | 80    | 34.36   | 3.97   | -3.113519124 | Down | 4.45E-138 | 2.29E-137 |
| novel mir355     | 416    | 33    | 14.17   | 1.64   | -3.111072038 | Down | 7.68E-58  | 1.87E-57  |
| mmu-miR-7687-3p  | 400    | 32    | 13.62   | 1.59   | -3.098628033 | Down | 1.78E-55  | 4.26E-55  |
| mmu-miR-196a-5p  | 1985   | 160   | 67.6    | 7.93   | -3.091630475 | Down | 5.18E-268 | 3.51E-267 |
| mmu-miR-181c-5p  | 10624  | 860   | 361.8   | 42.64  | -3.084913065 | Down | 0         | 0         |

|                 |         |        |          |         |              |      |             |            |
|-----------------|---------|--------|----------|---------|--------------|------|-------------|------------|
| novel mir39     | 196     | 16     | 6.67     | 0.79    | -3.077762203 | Down | 1.15E-27    | 2.08E-27   |
| mmu-let-7f-2-3p | 4574    | 372    | 155.77   | 18.45   | -3.077724688 | Down | 0           | 0          |
| mmu-miR-23b-3p  | 3461    | 283    | 117.87   | 14.03   | -3.07060966  | Down | 0           | 0          |
| mmu-miR-8112    | 2833    | 234    | 96.48    | 11.6    | -3.056105102 | Down | 0           | 0          |
| mmu-miR-24-2-5p | 2114    | 175    | 71.99    | 8.68    | -3.052029571 | Down | 6.04E-282   | 4.20E-281  |
| mmu-miR-3074-5p | 826812  | 68615  | 28157.33 | 3402.28 | -3.048936756 | Down | 0           | 0          |
| mmu-miR-1964-3p | 971     | 81     | 33.07    | 4.02    | -3.040255639 | Down | 5.29E-130   | 2.63E-129  |
| mmu-let-7e-3p   | 2271    | 190    | 77.34    | 9.42    | -3.037415799 | Down | 2.69E-301   | 1.89E-300  |
| mmu-miR-1231-3p | 24      | 2      | 0.82     | 0.1     | -3.03562391  | Down | 0.000273976 | 0.00032243 |
| mmu-miR-376a-3p | 572     | 48     | 19.48    | 2.38    | -3.032960199 | Down | 4.82E-77    | 1.51E-76   |
| novel mir387    | 642     | 54     | 21.86    | 2.68    | -3.027988495 | Down | 3.45E-86    | 1.20E-85   |
| mmu-miR-17-3p   | 404     | 35     | 13.76    | 1.74    | -2.983321259 | Down | 4.40E-54    | 1.03E-53   |
| mmu-miR-487b-3p | 977     | 85     | 33.27    | 4.21    | -2.982329728 | Down | 2.67E-128   | 1.32E-127  |
| mmu-miR-224-5p  | 2979    | 261    | 101.45   | 12.94   | -2.970859343 | Down | 0           | 0          |
| mmu-miR-5113    | 262     | 23     | 8.92     | 1.14    | -2.968009886 | Down | 2.27E-35    | 4.36E-35   |
| mmu-miR-486b-3p | 41684   | 3704   | 1419.56  | 183.66  | -2.950334472 | Down | 0           | 0          |
| mmu-miR-485-5p  | 11334   | 1009   | 385.98   | 50.03   | -2.947660737 | Down | 0           | 0          |
| mmu-miR-130b-5p | 899     | 80     | 30.62    | 3.97    | -2.94726337  | Down | 6.13E-117   | 2.86E-116  |
| mmu-miR-215-3p  | 1648    | 148    | 56.12    | 7.34    | -2.934663041 | Down | 5.48E-212   | 3.42E-211  |
| mmu-miR-196b-5p | 203113  | 18457  | 6917.07  | 915.19  | -2.918017863 | Down | 0           | 0          |
| mmu-miR-203-3p  | 1240    | 113    | 42.23    | 5.6     | -2.914769515 | Down | 8.22E-159   | 4.45E-158  |
| mmu-miR-223-3p  | 43758   | 4015   | 1490.19  | 199.08  | -2.90407609  | Down | 0           | 0          |
| mmu-miR-451a    | 1416703 | 131155 | 48246.25 | 6503.34 | -2.891164055 | Down | 0           | 0          |
| mmu-miR-99a-5p  | 95499   | 8924   | 3252.25  | 442.5   | -2.877688801 | Down | 0           | 0          |
| mmu-miR-6395    | 32      | 3      | 1.09     | 0.15    | -2.861293729 | Down | 3.53E-05    | 4.36E-05   |
| mmu-miR-467c-5p | 273     | 26     | 9.3      | 1.29    | -2.849859651 | Down | 2.08E-35    | 4.01E-35   |
| mmu-miR-3084-3p | 313     | 30     | 10.66    | 1.49    | -2.838823202 | Down | 2.94E-40    | 5.89E-40   |
| mmu-miR-27b-3p  | 301568  | 29054  | 10269.99 | 1440.65 | -2.833642991 | Down | 0           | 0          |
| mmu-miR-155-5p  | 207     | 20     | 7.05     | 0.99    | -2.832122827 | Down | 5.39E-27    | 9.66E-27   |
| mmu-miR-3087-3p | 328     | 32     | 11.17    | 1.59    | -2.812530515 | Down | 9.55E-42    | 1.95E-41   |
| mmu-miR-221-3p  | 3918    | 386    | 133.43   | 19.14   | -2.801420339 | Down | 0           | 0          |
| novel mir2      | 856     | 86     | 29.15    | 4.26    | -2.774570548 | Down | 7.98E-105   | 3.36E-104  |
| mmu-miR-7a-5p   | 10399   | 1045   | 354.14   | 51.82   | -2.772738884 | Down | 0           | 0          |
| mmu-miR-7075-3p | 338     | 34     | 11.51    | 1.69    | -2.767792682 | Down | 2.63E-42    | 5.41E-42   |
| mmu-miR-222-5p  | 1087    | 110    | 37.02    | 5.45    | -2.76397676  | Down | 3.84E-132   | 1.93E-131  |
| mmu-miR-328-3p  | 615598  | 63078  | 20964.38 | 3127.73 | -2.744752282 | Down | 0           | 0          |

|                   |         |        |          |         |              |      |           |           |
|-------------------|---------|--------|----------|---------|--------------|------|-----------|-----------|
| mmu-miR-132-5p    | 642     | 66     | 21.86    | 3.27    | -2.74093086  | Down | 4.61E-78  | 1.47E-77  |
| mmu-miR-148a-3p   | 4641    | 486    | 158.05   | 24.1    | -2.713275984 | Down | 0         | 0         |
| mmu-miR-15a-5p    | 3532    | 370    | 120.28   | 18.35   | -2.712544805 | Down | 0         | 0         |
| mmu-miR-423-3p    | 96384   | 10155  | 3282.39  | 503.54  | -2.704568372 | Down | 0         | 0         |
| mmu-let-7a-1-3p   | 4541    | 479    | 154.65   | 23.75   | -2.703007415 | Down | 0         | 0         |
| mmu-miR-374b-5p   | 960     | 102    | 32.69    | 5.06    | -2.691640087 | Down | 8.12E-114 | 3.66E-113 |
| novel mir308      | 276     | 30     | 9.4      | 1.49    | -2.657348426 | Down | 2.11E-33  | 4.00E-33  |
| mmu-miR-130a-3p   | 6553    | 717    | 223.16   | 35.55   | -2.650156992 | Down | 0         | 0         |
| mmu-miR-7070-3p   | 45      | 5      | 1.53     | 0.25    | -2.613531653 | Down | 2.22E-06  | 2.89E-06  |
| novel mir339      | 979     | 110    | 33.34    | 5.45    | -2.612925969 | Down | 2.36E-112 | 1.04E-111 |
| novel mir8        | 204     | 23     | 6.95     | 1.14    | -2.607979153 | Down | 1.50E-24  | 2.62E-24  |
| mmu-miR-598-3p    | 213     | 24     | 7.25     | 1.19    | -2.607019422 | Down | 1.39E-25  | 2.46E-25  |
| mmu-miR-149-5p    | 15203   | 1723   | 517.74   | 85.44   | -2.599244231 | Down | 0         | 0         |
| mmu-miR-125b-1-3p | 376     | 43     | 12.8     | 2.13    | -2.587218475 | Down | 1.12E-43  | 2.31E-43  |
| mmu-miR-92a-3p    | 1542701 | 177498 | 52537.15 | 8801.26 | -2.577555958 | Down | 0         | 0         |
| mmu-miR-409-3p    | 4007    | 462    | 136.46   | 22.91   | -2.574428758 | Down | 0         | 0         |
| mmu-miR-193b-3p   | 5550    | 641    | 189.01   | 31.78   | -2.572271536 | Down | 0         | 0         |
| mmu-miR-26a-5p    | 32901   | 3869   | 1120.45  | 191.84  | -2.546102801 | Down | 0         | 0         |
| mmu-miR-30d-5p    | 59416   | 7035   | 2023.43  | 348.83  | -2.536206915 | Down | 0         | 0         |
| mmu-miR-101a-3p   | 601     | 72     | 20.47    | 3.57    | -2.519515123 | Down | 5.78E-67  | 1.58E-66  |
| mmu-miR-499-5p    | 1176    | 143    | 40.05    | 7.09    | -2.49794471  | Down | 3.28E-128 | 1.61E-127 |
| mmu-miR-29a-3p    | 43946   | 5354   | 1496.59  | 265.48  | -2.495003956 | Down | 0         | 0         |
| mmu-miR-128-3p    | 90942   | 11119  | 3097.06  | 551.34  | -2.489885154 | Down | 0         | 0         |
| mmu-miR-218-5p    | 2785    | 343    | 94.84    | 17.01   | -2.479112522 | Down | 1.24E-298 | 8.69E-298 |
| mmu-miR-28a-3p    | 6689    | 826    | 227.8    | 40.96   | -2.475480127 | Down | 0         | 0         |
| mmu-miR-1247-5p   | 151     | 19     | 5.14     | 0.94    | -2.451035698 | Down | 2.23E-17  | 3.59E-17  |
| mmu-miR-27a-5p    | 262     | 33     | 8.92     | 1.64    | -2.443347895 | Down | 3.99E-29  | 7.34E-29  |
| mmu-miR-27a-3p    | 898139  | 114286 | 30586.4  | 5666.89 | -2.432261209 | Down | 0         | 0         |
| mmu-miR-150-5p    | 141786  | 18076  | 4828.57  | 896.3   | -2.429542391 | Down | 0         | 0         |
| mmu-miR-1934-5p   | 453     | 58     | 15.43    | 2.88    | -2.421597345 | Down | 9.50E-49  | 2.08E-48  |
| mmu-miR-16-5p     | 117675  | 15122  | 4007.46  | 749.83  | -2.418052668 | Down | 0         | 0         |
| mmu-miR-1839-5p   | 6981    | 902    | 237.74   | 44.73   | -2.410069995 | Down | 0         | 0         |
| mmu-miR-323-3p    | 376     | 49     | 12.8     | 2.43    | -2.397115591 | Down | 2.99E-40  | 6.00E-40  |
| mmu-miR-341-3p    | 7007    | 920    | 238.63   | 45.62   | -2.387037075 | Down | 0         | 0         |
| mmu-miR-326-3p    | 7949    | 1046   | 270.71   | 51.87   | -2.383775907 | Down | 0         | 0         |
| mmu-miR-30a-3p    | 7899    | 1053   | 269      | 52.21   | -2.365208109 | Down | 0         | 0         |

|                   |        |       |          |         |              |      |           |           |
|-------------------|--------|-------|----------|---------|--------------|------|-----------|-----------|
| mmu-miR-204-3p    | 836    | 114   | 28.47    | 5.65    | -2.33311972  | Down | 7.91E-85  | 2.72E-84  |
| mmu-miR-125a-3p   | 191    | 26    | 6.5      | 1.29    | -2.333068652 | Down | 1.49E-20  | 2.49E-20  |
| mmu-let-7i-3p     | 3059   | 418   | 104.18   | 20.73   | -2.329286321 | Down | 2.00E-305 | 1.42E-304 |
| mmu-miR-379-5p    | 10898  | 1492  | 371.13   | 73.98   | -2.326717419 | Down | 0         | 0         |
| mmu-miR-872-3p    | 5362   | 738   | 182.6    | 36.59   | -2.319165445 | Down | 0         | 0         |
| mmu-miR-191-5p    | 701318 | 96872 | 23883.6  | 4803.41 | -2.31388945  | Down | 0         | 0         |
| mmu-miR-192-5p    | 59308  | 8248  | 2019.75  | 408.98  | -2.304074531 | Down | 0         | 0         |
| mmu-miR-7a-1-3p   | 5153   | 732   | 175.49   | 36.3    | -2.27334737  | Down | 0         | 0         |
| mmu-miR-3074-2-3p | 1162   | 167   | 39.57    | 8.28    | -2.256704392 | Down | 8.63E-113 | 3.86E-112 |
| novel mir50       | 6062   | 878   | 206.44   | 43.54   | -2.245309223 | Down | 0         | 0         |
| mmu-miR-140-5p    | 3461   | 506   | 117.87   | 25.09   | -2.232012198 | Down | 0         | 0         |
| mmu-miR-128-1-5p  | 54     | 8     | 1.84     | 0.4     | -2.201633861 | Down | 2.38E-06  | 3.10E-06  |
| mmu-miR-28a-5p    | 235    | 35    | 8        | 1.74    | -2.200912694 | Down | 2.01E-23  | 3.46E-23  |
| mmu-miR-1198-3p   | 391    | 59    | 13.32    | 2.93    | -2.184621513 | Down | 1.27E-37  | 2.50E-37  |
| mmu-miR-676-3p    | 12346  | 1897  | 420.45   | 94.06   | -2.160281008 | Down | 0         | 0         |
| novel mir168      | 7485   | 1156  | 254.9    | 57.32   | -2.152820859 | Down | 0         | 0         |
| novel mir330      | 483    | 76    | 16.45    | 3.77    | -2.125451155 | Down | 1.34E-44  | 2.79E-44  |
| mmu-miR-22-5p     | 1438   | 228   | 48.97    | 11.31   | -2.114299267 | Down | 1.14E-128 | 5.64E-128 |
| mmu-miR-425-3p    | 14377  | 2291  | 489.61   | 113.6   | -2.10767019  | Down | 0         | 0         |
| novel mir705      | 570    | 91    | 19.41    | 4.51    | -2.105600779 | Down | 9.98E-52  | 2.25E-51  |
| mmu-miR-96-5p     | 733    | 117   | 24.96    | 5.8     | -2.105493129 | Down | 4.60E-66  | 1.24E-65  |
| mmu-miR-99b-5p    | 22541  | 3599  | 767.64   | 178.46  | -2.104829144 | Down | 0         | 0         |
| mmu-miR-21a-5p    | 199248 | 32041 | 6785.45  | 1588.76 | -2.09454329  | Down | 0         | 0         |
| mmu-miR-8116      | 5084   | 823   | 173.14   | 40.81   | -2.084944449 | Down | 0         | 0         |
| mmu-let-7j        | 148    | 24    | 5.04     | 1.19    | -2.08246216  | Down | 2.57E-14  | 3.99E-14  |
| mmu-miR-20a-5p    | 740    | 121   | 25.2     | 6       | -2.070389328 | Down | 2.47E-65  | 6.57E-65  |
| mmu-miR-185-5p    | 6895   | 1141  | 234.81   | 56.58   | -2.053129769 | Down | 0         | 0         |
| mmu-miR-652-3p    | 79718  | 13339 | 2714.82  | 661.42  | -2.037217971 | Down | 0         | 0         |
| mmu-miR-486a-3p   | 10018  | 1755  | 341.17   | 87.02   | -1.97107187  | Down | 0         | 0         |
| mmu-miR-200a-3p   | 871    | 159   | 29.66    | 7.88    | -1.912251063 | Down | 2.76E-69  | 7.78E-69  |
| mmu-miR-411-5p    | 2483   | 458   | 84.56    | 22.71   | -1.896647671 | Down | 3.18E-192 | 1.86E-191 |
| novel mir579      | 223    | 42    | 7.59     | 2.08    | -1.867516357 | Down | 2.50E-18  | 4.05E-18  |
| mmu-let-7k        | 497155 | 94392 | 16930.76 | 4680.44 | -1.854930669 | Down | 0         | 0         |
| mmu-miR-214-5p    | 193    | 37    | 6.57     | 1.83    | -1.844049722 | Down | 8.74E-16  | 1.38E-15  |
| mmu-miR-301a-3p   | 606    | 118   | 20.64    | 5.85    | -1.818934441 | Down | 1.10E-45  | 2.30E-45  |
| mmu-miR-187-3p    | 1259   | 256   | 42.88    | 12.69   | -1.756612837 | Down | 7.12E-89  | 2.59E-88  |



|                 |         |        |          |          |              |      |           |           |
|-----------------|---------|--------|----------|----------|--------------|------|-----------|-----------|
| mmu-miR-182-5p  | 496     | 102    | 16.89    | 5.06     | -1.738960038 | Down | 1.41E-35  | 2.71E-35  |
| mmu-miR-24-3p   | 1965736 | 406005 | 66943.73 | 20131.81 | -1.733472051 | Down | 0         | 0         |
| mmu-miR-191-3p  | 1938    | 425    | 66       | 21.07    | -1.64727571  | Down | 1.97E-124 | 9.43E-124 |
| mmu-miR-375-3p  | 107106  | 24305  | 3647.53  | 1205.17  | -1.597683178 | Down | 0         | 0         |
| mmu-miR-23a-3p  | 590879  | 135159 | 20122.56 | 6701.88  | -1.586176097 | Down | 0         | 0         |
| mmu-miR-139-5p  | 81212   | 18953  | 2765.7   | 939.79   | -1.557234352 | Down | 0         | 0         |
| mmu-miR-130b-3p | 304     | 71     | 10.35    | 3.52     | -1.555983434 | Down | 2.28E-19  | 3.73E-19  |
| novel mir340    | 418     | 98     | 14.24    | 4.86     | -1.550920927 | Down | 5.95E-26  | 1.06E-25  |
| mmu-miR-378a-5p | 264     | 62     | 8.99     | 3.07     | -1.55008246  | Down | 6.77E-17  | 1.08E-16  |
| mmu-miR-151-5p  | 15744   | 3755   | 536.17   | 186.19   | -1.525914909 | Down | 0         | 0         |
| mmu-miR-7a-2-3p | 384     | 92     | 13.08    | 4.56     | -1.520256811 | Down | 2.58E-23  | 4.43E-23  |
| mmu-miR-532-5p  | 1178    | 285    | 40.12    | 14.13    | -1.50556014  | Down | 2.46E-67  | 6.75E-67  |
| mmu-miR-154-5p  | 6444    | 1560   | 219.45   | 77.35    | -1.504419073 | Down | 0         | 0         |
| mmu-miR-223-5p  | 3003    | 744    | 102.27   | 36.89    | -1.471081311 | Down | 2.59E-163 | 1.42E-162 |
| novel mir415    | 278     | 70     | 9.47     | 3.47     | -1.448428763 | Down | 3.31E-16  | 5.23E-16  |
| mmu-miR-322-5p  | 10984   | 2768   | 374.06   | 137.25   | -1.446463551 | Down | 0         | 0         |
| mmu-miR-429-3p  | 49649   | 12590  | 1690.81  | 624.28   | -1.437449398 | Down | 0         | 0         |
| mmu-miR-425-5p  | 10249   | 2611   | 349.03   | 129.47   | -1.430733201 | Down | 0         | 0         |
| mmu-miR-339-5p  | 2081    | 532    | 70.87    | 26.38    | -1.425730484 | Down | 1.03E-108 | 4.49E-108 |
| mmu-miR-669o-5p | 176     | 45     | 5.99     | 2.23     | -1.425512293 | Down | 1.49E-10  | 2.17E-10  |
| mmu-miR-181d-5p | 7179    | 1876   | 244.48   | 93.02    | -1.394103604 | Down | 0         | 0         |
| mmu-miR-431-5p  | 1363    | 361    | 46.42    | 17.9     | -1.374786935 | Down | 4.06E-68  | 1.14E-67  |
| mmu-miR-543-5p  | 585     | 159    | 19.92    | 7.88     | -1.337950113 | Down | 5.12E-29  | 9.38E-29  |
| mmu-miR-1198-5p | 252063  | 68565  | 8584.08  | 3399.8   | -1.336213642 | Down | 0         | 0         |
| mmu-miR-338-5p  | 418     | 115    | 14.24    | 5.7      | -1.320915322 | Down | 8.81E-21  | 1.48E-20  |
| mmu-miR-34a-5p  | 5305    | 1459   | 180.66   | 72.34    | -1.320411611 | Down | 1.70E-244 | 1.10E-243 |
| mmu-let-7c-2-3p | 245     | 69     | 8.34     | 3.42     | -1.286051059 | Down | 2.47E-12  | 3.73E-12  |
| mmu-miR-30a-5p  | 2990    | 851    | 101.83   | 42.2     | -1.27084775  | Down | 6.57E-131 | 3.28E-130 |
| mmu-miR-146a-5p | 159456  | 45988  | 5430.32  | 2280.32  | -1.251800923 | Down | 0         | 0         |
| mmu-miR-150-3p  | 907     | 271    | 30.89    | 13.44    | -1.200606733 | Down | 1.25E-37  | 2.46E-37  |
| mmu-miR-205-5p  | 705     | 212    | 24.01    | 10.51    | -1.191872734 | Down | 2.86E-29  | 5.28E-29  |
| mmu-miR-25-3p   | 109617  | 33471  | 3733.04  | 1659.66  | -1.169463248 | Down | 0         | 0         |
| mmu-miR-202-5p  | 425     | 134    | 14.47    | 6.64     | -1.123809775 | Down | 9.20E-17  | 1.46E-16  |
| mmu-miR-423-5p  | 3566    | 1130   | 121.44   | 56.03    | -1.115972298 | Down | 1.99E-127 | 9.71E-127 |
| mmu-miR-138-5p  | 510     | 174    | 17.37    | 8.63     | -1.00916529  | Down | 6.27E-17  | 1.00E-16  |
