# Supplementary material for: Pathogenic Effects and Potential Regulatory Mechanisms of Tea Polyphenols on Obesity
Source: Hindawi journal article supplement (doi:10.1155/2019/2579734), 2019-06-11
Supplement: f2 [file 2579734.f2.pdf]

| miRNA id        | Count (DUI4) | Count (XIAO1) | TPM (DUI4) | TPM (XIAO1) | log2 Ratio(XIAO1/DUI4) | Up-Down-Regulation (XIAO1/DUI4) | P-value  | FDR      |
|-----------------|--------------|---------------|------------|-------------|------------------------|---------------------------------|----------|----------|
| mmu-miR-700-3p  | 0            | 351           | 0.001      | 8.79        | 13.10164745            | Up                              | 1.16E-84 | 2.87E-84 |
| novel mir626    | 0            | 294           | 0.001      | 7.36        | 12.84549005            | Up                              | 5.05E-71 | 1.16E-70 |
| mmu-miR-669e-5p | 0            | 172           | 0.001      | 4.31        | 12.07347215            | Up                              | 7.94E-42 | 1.62E-41 |
| mmu-miR-6961-5p | 0            | 162           | 0.001      | 4.06        | 11.98726401            | Up                              | 1.96E-39 | 3.96E-39 |
| mmu-miR-5114    | 0            | 156           | 0.001      | 3.91        | 11.93295289            | Up                              | 5.36E-38 | 1.08E-37 |
| mmu-miR-1930-5p | 0            | 127           | 0.001      | 3.18        | 11.63481105            | Up                              | 4.67E-31 | 9.09E-31 |
| mmu-miR-376b-5p | 0            | 110           | 0.001      | 2.75        | 11.4252159             | Up                              | 5.46E-27 | 1.05E-26 |
| mmu-miR-7058-5p | 0            | 106           | 0.001      | 2.65        | 11.37177664            | Up                              | 4.95E-26 | 9.48E-26 |
| mmu-miR-490-5p  | 0            | 93            | 0.001      | 2.33        | 11.18611424            | Up                              | 6.39E-23 | 1.20E-22 |
| mmu-miR-7b-5p   | 0            | 92            | 0.001      | 2.3         | 11.16741815            | Up                              | 1.11E-22 | 2.08E-22 |
| novel mir248    | 0            | 91            | 0.001      | 2.28        | 11.15481811            | Up                              | 1.92E-22 | 3.60E-22 |
| mmu-miR-129-5p  | 0            | 91            | 0.001      | 2.28        | 11.15481811            | Up                              | 1.92E-22 | 3.59E-22 |
| novel mir18     | 0            | 80            | 0.001      | 2           | 10.96578428            | Up                              | 8.25E-20 | 1.53E-19 |
| mmu-miR-744-3p  | 0            | 80            | 0.001      | 2           | 10.96578428            | Up                              | 8.25E-20 | 1.53E-19 |
| mmu-miR-671-5p  | 0            | 76            | 0.001      | 1.9         | 10.8917837             | Up                              | 7.48E-19 | 1.38E-18 |
| mmu-miR-5134-3p | 0            | 76            | 0.001      | 1.9         | 10.8917837             | Up                              | 7.48E-19 | 1.38E-18 |
| novel mir479    | 0            | 75            | 0.001      | 1.88        | 10.87651695            | Up                              | 1.30E-18 | 2.38E-18 |
| novel mir426    | 0            | 72            | 0.001      | 1.8         | 10.81378119            | Up                              | 6.78E-18 | 1.24E-17 |
| novel mir397    | 0            | 67            | 0.001      | 1.68        | 10.71424552            | Up                              | 1.07E-16 | 1.93E-16 |
| mmu-miR-133b-3p | 0            | 67            | 0.001      | 1.68        | 10.71424552            | Up                              | 1.07E-16 | 1.93E-16 |
| mmu-miR-181c-3p | 0            | 63            | 0.001      | 1.58        | 10.62570884            | Up                              | 9.66E-16 | 1.74E-15 |
| mmu-miR-466h-5p | 0            | 63            | 0.001      | 1.58        | 10.62570884            | Up                              | 9.66E-16 | 1.73E-15 |
| mmu-miR-674-5p  | 0            | 60            | 0.001      | 1.5         | 10.55074679            | Up                              | 5.05E-15 | 9.00E-15 |
| mmu-miR-328-5p  | 0            | 57            | 0.001      | 1.43        | 10.48179943            | Up                              | 2.64E-14 | 4.68E-14 |
| mmu-miR-672-5p  | 0            | 55            | 0.001      | 1.38        | 10.43045255            | Up                              | 7.93E-14 | 1.40E-13 |
| mmu-miR-496a-3p | 0            | 48            | 0.001      | 1.2         | 10.22881869            | Up                              | 3.76E-12 | 6.59E-12 |
| novel mir22     | 0            | 46            | 0.001      | 1.15        | 10.16741815            | Up                              | 1.13E-11 | 1.98E-11 |
| mmu-miR-7024-5p | 0            | 45            | 0.001      | 1.13        | 10.14210706            | Up                              | 1.96E-11 | 3.42E-11 |
| mmu-miR-483-5p  | 0            | 43            | 0.001      | 1.08        | 10.0768156             | Up                              | 5.91E-11 | 1.03E-10 |
| mmu-miR-195a-3p | 0            | 43            | 0.001      | 1.08        | 10.0768156             | Up                              | 5.91E-11 | 1.02E-10 |
| mmu-miR-6905-5p | 0            | 41            | 0.001      | 1.03        | 10.00842862            | Up                              | 1.78E-10 | 3.08E-10 |
| novel mir157    | 0            | 39            | 0.001      | 0.98        | 9.936637939            | Up                              | 5.35E-10 | 9.21E-10 |
| mmu-miR-7091-5p | 0            | 39            | 0.001      | 0.98        | 9.936637939            | Up                              | 5.35E-10 | 9.19E-10 |

|                   |   |    |       |      |             |    |          |          |
|-------------------|---|----|-------|------|-------------|----|----------|----------|
| novel mir506      | 0 | 38 | 0.001 | 0.95 | 9.891783703 | Up | 9.29E-10 | 1.59E-09 |
| mmu-miR-709       | 0 | 37 | 0.001 | 0.93 | 9.861086906 | Up | 1.61E-09 | 2.75E-09 |
| mmu-miR-9-3p      | 0 | 37 | 0.001 | 0.93 | 9.861086906 | Up | 1.61E-09 | 2.75E-09 |
| novel mir540      | 0 | 37 | 0.001 | 0.93 | 9.861086906 | Up | 1.61E-09 | 2.75E-09 |
| novel mir287      | 0 | 37 | 0.001 | 0.93 | 9.861086906 | Up | 1.61E-09 | 2.74E-09 |
| novel mir703      | 0 | 36 | 0.001 | 0.9  | 9.813781191 | Up | 2.80E-09 | 4.73E-09 |
| novel mir221      | 0 | 36 | 0.001 | 0.9  | 9.813781191 | Up | 2.80E-09 | 4.72E-09 |
| novel mir707      | 0 | 36 | 0.001 | 0.9  | 9.813781191 | Up | 2.80E-09 | 4.71E-09 |
| mmu-miR-125b-2-3p | 0 | 35 | 0.001 | 0.88 | 9.781359714 | Up | 4.85E-09 | 8.17E-09 |
| mmu-miR-664-5p    | 0 | 34 | 0.001 | 0.85 | 9.731319031 | Up | 8.41E-09 | 1.41E-08 |
| mmu-miR-99a-3p    | 0 | 34 | 0.001 | 0.85 | 9.731319031 | Up | 8.41E-09 | 1.41E-08 |
| novel mir161      | 0 | 33 | 0.001 | 0.83 | 9.696967526 | Up | 1.46E-08 | 2.44E-08 |
| novel mir446      | 0 | 32 | 0.001 | 0.8  | 9.64385619  | Up | 2.53E-08 | 4.22E-08 |
| mmu-miR-6546-3p   | 0 | 32 | 0.001 | 0.8  | 9.64385619  | Up | 2.53E-08 | 4.21E-08 |
| mmu-miR-669d-5p   | 0 | 31 | 0.001 | 0.78 | 9.607330314 | Up | 4.40E-08 | 7.30E-08 |
| mmu-miR-3068-5p   | 0 | 30 | 0.001 | 0.75 | 9.550746785 | Up | 7.63E-08 | 1.26E-07 |
| novel mir11       | 0 | 30 | 0.001 | 0.75 | 9.550746785 | Up | 7.63E-08 | 1.26E-07 |
| mmu-miR-351-3p    | 0 | 30 | 0.001 | 0.75 | 9.550746785 | Up | 7.63E-08 | 1.26E-07 |
| novel mir715      | 0 | 30 | 0.001 | 0.75 | 9.550746785 | Up | 7.63E-08 | 1.26E-07 |
| mmu-miR-669h-5p   | 0 | 29 | 0.001 | 0.73 | 9.511752654 | Up | 1.32E-07 | 2.17E-07 |
| mmu-miR-6900-3p   | 0 | 28 | 0.001 | 0.7  | 9.451211112 | Up | 2.30E-07 | 3.75E-07 |
| mmu-miR-344-3p    | 0 | 28 | 0.001 | 0.7  | 9.451211112 | Up | 2.30E-07 | 3.74E-07 |
| mmu-miR-7655-3p   | 0 | 27 | 0.001 | 0.68 | 9.409390936 | Up | 3.98E-07 | 6.47E-07 |
| mmu-miR-340-3p    | 0 | 27 | 0.001 | 0.68 | 9.409390936 | Up | 3.98E-07 | 6.46E-07 |
| novel mir517      | 0 | 27 | 0.001 | 0.68 | 9.409390936 | Up | 3.98E-07 | 6.45E-07 |
| novel mir389      | 0 | 27 | 0.001 | 0.68 | 9.409390936 | Up | 3.98E-07 | 6.44E-07 |
| mmu-miR-6952-5p   | 0 | 27 | 0.001 | 0.68 | 9.409390936 | Up | 3.98E-07 | 6.43E-07 |
| novel mir334      | 0 | 27 | 0.001 | 0.68 | 9.409390936 | Up | 3.98E-07 | 6.43E-07 |
| mmu-miR-210-5p    | 0 | 27 | 0.001 | 0.68 | 9.409390936 | Up | 3.98E-07 | 6.42E-07 |
| novel mir536      | 0 | 26 | 0.001 | 0.65 | 9.344295908 | Up | 6.91E-07 | 1.11E-06 |
| novel mir92       | 0 | 26 | 0.001 | 0.65 | 9.344295908 | Up | 6.91E-07 | 1.11E-06 |
| novel mir451      | 0 | 26 | 0.001 | 0.65 | 9.344295908 | Up | 6.91E-07 | 1.11E-06 |
| novel mir357      | 0 | 25 | 0.001 | 0.63 | 9.299208018 | Up | 1.20E-06 | 1.91E-06 |
| mmu-miR-6904-5p   | 0 | 25 | 0.001 | 0.63 | 9.299208018 | Up | 1.20E-06 | 1.91E-06 |
| novel mir756      | 0 | 25 | 0.001 | 0.63 | 9.299208018 | Up | 1.20E-06 | 1.91E-06 |
| mmu-miR-23a-5p    | 0 | 24 | 0.001 | 0.6  | 9.22881869  | Up | 2.08E-06 | 3.30E-06 |

|                 |   |    |       |      |             |    |          |          |
|-----------------|---|----|-------|------|-------------|----|----------|----------|
| mmu-miR-6915-5p | 0 | 24 | 0.001 | 0.6  | 9.22881869  | Up | 2.08E-06 | 3.30E-06 |
| mmu-miR-5107-5p | 0 | 24 | 0.001 | 0.6  | 9.22881869  | Up | 2.08E-06 | 3.29E-06 |
| mmu-miR-671-3p  | 0 | 24 | 0.001 | 0.6  | 9.22881869  | Up | 2.08E-06 | 3.29E-06 |
| mmu-miR-3080-5p | 0 | 23 | 0.001 | 0.58 | 9.17990909  | Up | 3.61E-06 | 5.67E-06 |
| novel mir646    | 0 | 23 | 0.001 | 0.58 | 9.17990909  | Up | 3.61E-06 | 5.67E-06 |
| novel mir14     | 0 | 23 | 0.001 | 0.58 | 9.17990909  | Up | 3.61E-06 | 5.66E-06 |
| novel mir63     | 0 | 23 | 0.001 | 0.58 | 9.17990909  | Up | 3.61E-06 | 5.65E-06 |
| mmu-miR-6984-5p | 0 | 22 | 0.001 | 0.55 | 9.103287808 | Up | 6.26E-06 | 9.78E-06 |
| mmu-miR-7687-5p | 0 | 22 | 0.001 | 0.55 | 9.103287808 | Up | 6.26E-06 | 9.76E-06 |
| mmu-miR-18b-5p  | 0 | 22 | 0.001 | 0.55 | 9.103287808 | Up | 6.26E-06 | 9.75E-06 |
| novel mir174    | 0 | 22 | 0.001 | 0.55 | 9.103287808 | Up | 6.26E-06 | 9.74E-06 |
| mmu-miR-1943-3p | 0 | 22 | 0.001 | 0.55 | 9.103287808 | Up | 6.26E-06 | 9.72E-06 |
| mmu-miR-6991-3p | 0 | 22 | 0.001 | 0.55 | 9.103287808 | Up | 6.26E-06 | 9.71E-06 |
| novel mir16     | 0 | 21 | 0.001 | 0.53 | 9.049848549 | Up | 1.09E-05 | 1.68E-05 |
| novel mir513    | 0 | 21 | 0.001 | 0.53 | 9.049848549 | Up | 1.09E-05 | 1.68E-05 |
| novel mir28     | 0 | 21 | 0.001 | 0.53 | 9.049848549 | Up | 1.09E-05 | 1.67E-05 |
| mmu-miR-201-5p  | 0 | 21 | 0.001 | 0.53 | 9.049848549 | Up | 1.09E-05 | 1.67E-05 |
| mmu-miR-7689-3p | 0 | 21 | 0.001 | 0.53 | 9.049848549 | Up | 1.09E-05 | 1.67E-05 |
| mmu-miR-5103    | 0 | 21 | 0.001 | 0.53 | 9.049848549 | Up | 1.09E-05 | 1.67E-05 |
| novel mir17     | 0 | 21 | 0.001 | 0.53 | 9.049848549 | Up | 1.09E-05 | 1.66E-05 |
| mmu-miR-6933-5p | 0 | 21 | 0.001 | 0.53 | 9.049848549 | Up | 1.09E-05 | 1.66E-05 |
| mmu-miR-7672-5p | 0 | 21 | 0.001 | 0.53 | 9.049848549 | Up | 1.09E-05 | 1.66E-05 |
| novel mir170    | 0 | 20 | 0.001 | 0.5  | 8.965784285 | Up | 1.89E-05 | 2.86E-05 |
| mmu-miR-669f-5p | 0 | 20 | 0.001 | 0.5  | 8.965784285 | Up | 1.89E-05 | 2.86E-05 |
| mmu-miR-8114    | 0 | 20 | 0.001 | 0.5  | 8.965784285 | Up | 1.89E-05 | 2.86E-05 |
| novel mir70     | 0 | 20 | 0.001 | 0.5  | 8.965784285 | Up | 1.89E-05 | 2.85E-05 |
| mmu-miR-3102-5p | 0 | 20 | 0.001 | 0.5  | 8.965784285 | Up | 1.89E-05 | 2.85E-05 |
| mmu-miR-3572-5p | 0 | 20 | 0.001 | 0.5  | 8.965784285 | Up | 1.89E-05 | 2.84E-05 |
| novel mir478    | 0 | 20 | 0.001 | 0.5  | 8.965784285 | Up | 1.89E-05 | 2.84E-05 |
| mmu-miR-7667-5p | 0 | 20 | 0.001 | 0.5  | 8.965784285 | Up | 1.89E-05 | 2.84E-05 |
| novel mir456    | 0 | 20 | 0.001 | 0.5  | 8.965784285 | Up | 1.89E-05 | 2.83E-05 |
| novel mir94     | 0 | 20 | 0.001 | 0.5  | 8.965784285 | Up | 1.89E-05 | 2.83E-05 |
| mmu-miR-203-5p  | 0 | 19 | 0.001 | 0.48 | 8.906890596 | Up | 3.27E-05 | 4.89E-05 |
| mmu-miR-7003-5p | 0 | 19 | 0.001 | 0.48 | 8.906890596 | Up | 3.27E-05 | 4.89E-05 |
| mmu-miR-219a-5p | 0 | 19 | 0.001 | 0.48 | 8.906890596 | Up | 3.27E-05 | 4.88E-05 |
| novel mir537    | 0 | 19 | 0.001 | 0.48 | 8.906890596 | Up | 3.27E-05 | 4.87E-05 |

|                  |   |    |       |      |             |    |             |             |
|------------------|---|----|-------|------|-------------|----|-------------|-------------|
| mmu-miR-7679-3p  | 0 | 19 | 0.001 | 0.48 | 8.906890596 | Up | 3.27E-05    | 4.87E-05    |
| mmu-miR-219b-5p  | 0 | 19 | 0.001 | 0.48 | 8.906890596 | Up | 3.27E-05    | 4.86E-05    |
| novel mir524     | 0 | 19 | 0.001 | 0.48 | 8.906890596 | Up | 3.27E-05    | 4.85E-05    |
| novel mir465     | 0 | 19 | 0.001 | 0.48 | 8.906890596 | Up | 3.27E-05    | 4.85E-05    |
| novel mir338     | 0 | 19 | 0.001 | 0.48 | 8.906890596 | Up | 3.27E-05    | 4.84E-05    |
| novel mir65      | 0 | 19 | 0.001 | 0.48 | 8.906890596 | Up | 3.27E-05    | 4.84E-05    |
| novel mir656     | 0 | 19 | 0.001 | 0.48 | 8.906890596 | Up | 3.27E-05    | 4.83E-05    |
| novel mir635     | 0 | 19 | 0.001 | 0.48 | 8.906890596 | Up | 3.27E-05    | 4.82E-05    |
| mmu-miR-7669-3p  | 0 | 19 | 0.001 | 0.48 | 8.906890596 | Up | 3.27E-05    | 4.82E-05    |
| mmu-miR-6993-5p  | 0 | 19 | 0.001 | 0.48 | 8.906890596 | Up | 3.27E-05    | 4.81E-05    |
| novel mir572     | 0 | 18 | 0.001 | 0.45 | 8.813781191 | Up | 5.68E-05    | 8.32E-05    |
| novel mir570     | 0 | 18 | 0.001 | 0.45 | 8.813781191 | Up | 5.68E-05    | 8.31E-05    |
| mmu-miR-138-2-3p | 0 | 18 | 0.001 | 0.45 | 8.813781191 | Up | 5.68E-05    | 8.30E-05    |
| novel mir444     | 0 | 18 | 0.001 | 0.45 | 8.813781191 | Up | 5.68E-05    | 8.29E-05    |
| novel mir421     | 0 | 18 | 0.001 | 0.45 | 8.813781191 | Up | 5.68E-05    | 8.28E-05    |
| mmu-miR-142b     | 0 | 18 | 0.001 | 0.45 | 8.813781191 | Up | 5.68E-05    | 8.27E-05    |
| novel mir460     | 0 | 18 | 0.001 | 0.45 | 8.813781191 | Up | 5.68E-05    | 8.26E-05    |
| mmu-miR-361-3p   | 0 | 18 | 0.001 | 0.45 | 8.813781191 | Up | 5.68E-05    | 8.25E-05    |
| novel mir530     | 0 | 18 | 0.001 | 0.45 | 8.813781191 | Up | 5.68E-05    | 8.24E-05    |
| mmu-miR-3473a    | 0 | 18 | 0.001 | 0.45 | 8.813781191 | Up | 5.68E-05    | 8.23E-05    |
| novel mir768     | 0 | 17 | 0.001 | 0.43 | 8.74819285  | Up | 9.85E-05    | 0.00014236  |
| mmu-miR-1191b-3p | 0 | 17 | 0.001 | 0.43 | 8.74819285  | Up | 9.85E-05    | 0.000142175 |
| mmu-miR-7091-3p  | 0 | 17 | 0.001 | 0.43 | 8.74819285  | Up | 9.85E-05    | 0.000141991 |
| novel mir769     | 0 | 17 | 0.001 | 0.43 | 8.74819285  | Up | 9.85E-05    | 0.000141807 |
| mmu-miR-1968-5p  | 0 | 17 | 0.001 | 0.43 | 8.74819285  | Up | 9.85E-05    | 0.000141624 |
| mmu-miR-674-3p   | 0 | 17 | 0.001 | 0.43 | 8.74819285  | Up | 9.85E-05    | 0.000141441 |
| novel mir238     | 0 | 17 | 0.001 | 0.43 | 8.74819285  | Up | 9.85E-05    | 0.000141259 |
| novel mir119     | 0 | 17 | 0.001 | 0.43 | 8.74819285  | Up | 9.85E-05    | 0.000141077 |
| novel mir162     | 0 | 17 | 0.001 | 0.43 | 8.74819285  | Up | 9.85E-05    | 0.000140896 |
| novel mir571     | 0 | 17 | 0.001 | 0.43 | 8.74819285  | Up | 9.85E-05    | 0.000140715 |
| mmu-miR-7240-5p  | 0 | 16 | 0.001 | 0.4  | 8.64385619  | Up | 0.000170882 | 0.000243212 |
| novel mir42      | 0 | 16 | 0.001 | 0.4  | 8.64385619  | Up | 0.000170882 | 0.000242901 |
| novel mir72      | 0 | 16 | 0.001 | 0.4  | 8.64385619  | Up | 0.000170882 | 0.000242591 |
| mmu-miR-3079-5p  | 0 | 16 | 0.001 | 0.4  | 8.64385619  | Up | 0.000170882 | 0.000242282 |
| novel mir767     | 0 | 16 | 0.001 | 0.4  | 8.64385619  | Up | 0.000170882 | 0.000241974 |
| mmu-miR-30b-3p   | 0 | 16 | 0.001 | 0.4  | 8.64385619  | Up | 0.000170882 | 0.000241666 |

|                 |   |    |       |      |             |    |             |             |
|-----------------|---|----|-------|------|-------------|----|-------------|-------------|
| mmu-miR-7672-3p | 0 | 16 | 0.001 | 0.4  | 8.64385619  | Up | 0.000170882 | 0.00024136  |
| novel mir668    | 0 | 16 | 0.001 | 0.4  | 8.64385619  | Up | 0.000170882 | 0.000241054 |
| novel mir495    | 0 | 16 | 0.001 | 0.4  | 8.64385619  | Up | 0.000170882 | 0.000240749 |
| mmu-miR-7042-5p | 0 | 16 | 0.001 | 0.4  | 8.64385619  | Up | 0.000170882 | 0.000240444 |
| novel mir6      | 0 | 16 | 0.001 | 0.4  | 8.64385619  | Up | 0.000170882 | 0.000240141 |
| novel mir56     | 0 | 16 | 0.001 | 0.4  | 8.64385619  | Up | 0.000170882 | 0.000239838 |
| mmu-miR-3064-5p | 0 | 16 | 0.001 | 0.4  | 8.64385619  | Up | 0.000170882 | 0.000239536 |
| mmu-miR-129b-3p | 0 | 16 | 0.001 | 0.4  | 8.64385619  | Up | 0.000170882 | 0.000239235 |
| novel mir169    | 0 | 16 | 0.001 | 0.4  | 8.64385619  | Up | 0.000170882 | 0.000238934 |
| novel mir234    | 0 | 16 | 0.001 | 0.4  | 8.64385619  | Up | 0.000170882 | 0.000238634 |
| novel mir189    | 0 | 16 | 0.001 | 0.4  | 8.64385619  | Up | 0.000170882 | 0.000238335 |
| mmu-miR-7679-5p | 0 | 15 | 0.001 | 0.38 | 8.569855608 | Up | 0.00029649  | 0.000412492 |
| novel mir20     | 0 | 15 | 0.001 | 0.38 | 8.569855608 | Up | 0.00029649  | 0.000411977 |
| novel mir124    | 0 | 15 | 0.001 | 0.38 | 8.569855608 | Up | 0.00029649  | 0.000411463 |
| novel mir602    | 0 | 15 | 0.001 | 0.38 | 8.569855608 | Up | 0.00029649  | 0.000410951 |
| mmu-miR-1839-3p | 0 | 15 | 0.001 | 0.38 | 8.569855608 | Up | 0.00029649  | 0.00041044  |
| novel mir468    | 0 | 15 | 0.001 | 0.38 | 8.569855608 | Up | 0.00029649  | 0.00040993  |
| mmu-miR-5116    | 0 | 15 | 0.001 | 0.38 | 8.569855608 | Up | 0.00029649  | 0.000409421 |
| novel mir137    | 0 | 15 | 0.001 | 0.38 | 8.569855608 | Up | 0.00029649  | 0.000408914 |
| novel mir575    | 0 | 15 | 0.001 | 0.38 | 8.569855608 | Up | 0.00029649  | 0.000408408 |
| novel mir650    | 0 | 15 | 0.001 | 0.38 | 8.569855608 | Up | 0.00029649  | 0.000407903 |
| mmu-miR-1951    | 0 | 15 | 0.001 | 0.38 | 8.569855608 | Up | 0.00029649  | 0.000407399 |
| novel mir130    | 0 | 15 | 0.001 | 0.38 | 8.569855608 | Up | 0.00029649  | 0.000406897 |
| mmu-miR-488-3p  | 0 | 15 | 0.001 | 0.38 | 8.569855608 | Up | 0.00029649  | 0.000406396 |
| novel mir464    | 0 | 15 | 0.001 | 0.38 | 8.569855608 | Up | 0.00029649  | 0.000405896 |
| novel mir365    | 0 | 15 | 0.001 | 0.38 | 8.569855608 | Up | 0.00029649  | 0.000405397 |
| mmu-miR-698-5p  | 0 | 15 | 0.001 | 0.38 | 8.569855608 | Up | 0.00029649  | 0.0004049   |
| novel mir403    | 0 | 15 | 0.001 | 0.38 | 8.569855608 | Up | 0.00029649  | 0.000404404 |
| novel mir400    | 0 | 15 | 0.001 | 0.38 | 8.569855608 | Up | 0.00029649  | 0.000403909 |
| novel mir224    | 0 | 15 | 0.001 | 0.38 | 8.569855608 | Up | 0.00029649  | 0.000403415 |
| novel mir681    | 0 | 14 | 0.001 | 0.35 | 8.451211112 | Up | 0.000514426 | 0.000695694 |
| mmu-miR-466c-5p | 0 | 14 | 0.001 | 0.35 | 8.451211112 | Up | 0.000514426 | 0.00069485  |
| novel mir158    | 0 | 14 | 0.001 | 0.35 | 8.451211112 | Up | 0.000514426 | 0.000694007 |
| novel mir542    | 0 | 14 | 0.001 | 0.35 | 8.451211112 | Up | 0.000514426 | 0.000693167 |
| novel mir522    | 0 | 14 | 0.001 | 0.35 | 8.451211112 | Up | 0.000514426 | 0.000692329 |
| mmu-miR-879-3p  | 0 | 14 | 0.001 | 0.35 | 8.451211112 | Up | 0.000514426 | 0.000691493 |

|                   |   |     |       |       |             |    |             |             |
|-------------------|---|-----|-------|-------|-------------|----|-------------|-------------|
| novel mir199      | 0 | 14  | 0.001 | 0.35  | 8.451211112 | Up | 0.000514426 | 0.000690659 |
| mmu-miR-494-5p    | 0 | 14  | 0.001 | 0.35  | 8.451211112 | Up | 0.000514426 | 0.000689827 |
| novel mir663      | 0 | 14  | 0.001 | 0.35  | 8.451211112 | Up | 0.000514426 | 0.000688997 |
| novel mir671      | 0 | 14  | 0.001 | 0.35  | 8.451211112 | Up | 0.000514426 | 0.000688168 |
| novel mir328      | 0 | 14  | 0.001 | 0.35  | 8.451211112 | Up | 0.000514426 | 0.000687342 |
| novel mir45       | 0 | 14  | 0.001 | 0.35  | 8.451211112 | Up | 0.000514426 | 0.000686518 |
| novel mir553      | 0 | 14  | 0.001 | 0.35  | 8.451211112 | Up | 0.000514426 | 0.000685696 |
| novel mir556      | 0 | 14  | 0.001 | 0.35  | 8.451211112 | Up | 0.000514426 | 0.000684876 |
| mmu-miR-6957-3p   | 0 | 14  | 0.001 | 0.35  | 8.451211112 | Up | 0.000514426 | 0.000684058 |
| novel mir682      | 0 | 14  | 0.001 | 0.35  | 8.451211112 | Up | 0.000514426 | 0.000683241 |
| novel mir747      | 0 | 14  | 0.001 | 0.35  | 8.451211112 | Up | 0.000514426 | 0.000682427 |
| mmu-miR-3572-3p   | 0 | 14  | 0.001 | 0.35  | 8.451211112 | Up | 0.000514426 | 0.000681614 |
| mmu-miR-103-2-5p  | 0 | 14  | 0.001 | 0.35  | 8.451211112 | Up | 0.000514426 | 0.000680804 |
| novel mir648      | 0 | 14  | 0.001 | 0.35  | 8.451211112 | Up | 0.000514426 | 0.000679995 |
| novel mir664      | 0 | 14  | 0.001 | 0.35  | 8.451211112 | Up | 0.000514426 | 0.000679189 |
| mmu-miR-3097-3p   | 0 | 14  | 0.001 | 0.35  | 8.451211112 | Up | 0.000514426 | 0.000678384 |
| novel mir402      | 0 | 14  | 0.001 | 0.35  | 8.451211112 | Up | 0.000514426 | 0.000677581 |
| novel mir488      | 0 | 14  | 0.001 | 0.35  | 8.451211112 | Up | 0.000514426 | 0.00067678  |
| mmu-miR-183-3p    | 0 | 14  | 0.001 | 0.35  | 8.451211112 | Up | 0.000514426 | 0.000675981 |
| novel mir398      | 0 | 14  | 0.001 | 0.35  | 8.451211112 | Up | 0.000514426 | 0.000675184 |
| mmu-miR-3057-5p   | 1 | 188 | 0.03  | 4.71  | 7.294620749 | Up | 9.54E-44    | 1.97E-43    |
| mmu-miR-33-5p     | 3 | 608 | 0.1   | 15.22 | 7.249824549 | Up | 1.05E-139   | 4.09E-139   |
| mmu-miR-541-5p    | 1 | 160 | 0.03  | 4.01  | 7.062495926 | Up | 4.09E-37    | 8.16E-37    |
| mmu-miR-7010-5p   | 1 | 151 | 0.03  | 3.78  | 6.977279923 | Up | 5.51E-35    | 1.09E-34    |
| mmu-miR-7115-5p   | 3 | 465 | 0.1   | 11.64 | 6.862947248 | Up | 7.91E-106   | 2.32E-105   |
| mmu-miR-202-3p    | 1 | 123 | 0.03  | 3.08  | 6.68182404  | Up | 2.26E-28    | 4.38E-28    |
| mmu-miR-5622-3p   | 1 | 114 | 0.03  | 2.85  | 6.569855608 | Up | 3.00E-26    | 5.75E-26    |
| mmu-miR-6691-5p   | 1 | 113 | 0.03  | 2.83  | 6.559695742 | Up | 5.15E-26    | 9.85E-26    |
| mmu-miR-1943-5p   | 1 | 110 | 0.03  | 2.75  | 6.518325308 | Up | 2.62E-25    | 4.98E-25    |
| mmu-miR-7651-5p   | 1 | 99  | 0.03  | 2.48  | 6.36923381  | Up | 1.02E-22    | 1.91E-22    |
| mmu-miR-500-3p    | 1 | 98  | 0.03  | 2.45  | 6.351675438 | Up | 1.75E-22    | 3.27E-22    |
| mmu-miR-25-5p     | 1 | 93  | 0.03  | 2.33  | 6.279223644 | Up | 2.61E-21    | 4.86E-21    |
| mmu-miR-1947-5p   | 2 | 198 | 0.07  | 4.96  | 6.146841388 | Up | 1.74E-44    | 3.60E-44    |
| mmu-miR-200b-5p   | 1 | 79  | 0.03  | 1.98  | 6.044394119 | Up | 5.00E-18    | 9.15E-18    |
| mmu-miR-700-5p    | 2 | 180 | 0.07  | 4.51  | 6.009628701 | Up | 2.93E-40    | 5.96E-40    |
| mmu-miR-181a-1-3p | 1 | 69  | 0.03  | 1.73  | 5.849665727 | Up | 1.09E-15    | 1.95E-15    |

|                   |   |     |      |       |             |    |             |             |
|-------------------|---|-----|------|-------|-------------|----|-------------|-------------|
| mmu-miR-380-3p    | 1 | 66  | 0.03 | 1.65  | 5.781359714 | Up | 5.43E-15    | 9.68E-15    |
| mmu-miR-1945      | 1 | 64  | 0.03 | 1.6   | 5.736965594 | Up | 1.59E-14    | 2.82E-14    |
| mmu-miR-3474      | 1 | 63  | 0.03 | 1.58  | 5.718818247 | Up | 2.72E-14    | 4.81E-14    |
| mmu-miR-99b-3p    | 9 | 596 | 0.31 | 14.92 | 5.58883551  | Up | 3.46E-127   | 1.23E-126   |
| mmu-miR-30d-3p    | 3 | 186 | 0.1  | 4.66  | 5.54225805  | Up | 3.10E-40    | 6.28E-40    |
| mmu-miR-3074-1-3p | 1 | 52  | 0.03 | 1.3   | 5.437405312 | Up | 9.72E-12    | 1.70E-11    |
| mmu-miR-874-3p    | 2 | 119 | 0.07 | 2.98  | 5.411813598 | Up | 5.19E-26    | 9.91E-26    |
| mmu-miR-29c-5p    | 3 | 156 | 0.1  | 3.91  | 5.289096702 | Up | 2.80E-33    | 5.50E-33    |
| mmu-miR-675-3p    | 1 | 46  | 0.03 | 1.15  | 5.26052755  | Up | 2.36E-10    | 4.08E-10    |
| mmu-miR-449a-5p   | 6 | 279 | 0.2  | 6.98  | 5.125155131 | Up | 8.43E-58    | 1.81E-57    |
| mmu-miR-8097      | 1 | 39  | 0.03 | 0.98  | 5.029747343 | Up | 9.60E-09    | 1.61E-08    |
| mmu-miR-8096      | 1 | 38  | 0.03 | 0.95  | 4.984893108 | Up | 1.63E-08    | 2.71E-08    |
| mmu-miR-145a-3p   | 3 | 123 | 0.1  | 3.08  | 4.944858446 | Up | 1.11E-25    | 2.11E-25    |
| mmu-miR-3473d     | 2 | 85  | 0.07 | 2.13  | 4.927354698 | Up | 3.72E-18    | 6.82E-18    |
| mmu-miR-505-5p    | 4 | 164 | 0.14 | 4.11  | 4.875639662 | Up | 7.12E-34    | 1.40E-33    |
| mmu-miR-20b-5p    | 2 | 81  | 0.07 | 2.03  | 4.857980995 | Up | 3.08E-17    | 5.59E-17    |
| mmu-miR-93-3p     | 2 | 73  | 0.07 | 1.83  | 4.708344916 | Up | 2.07E-15    | 3.71E-15    |
| mmu-miR-3099-3p   | 1 | 30  | 0.03 | 0.75  | 4.64385619  | Up | 1.08E-06    | 1.73E-06    |
| mmu-miR-3084-5p   | 4 | 139 | 0.14 | 3.48  | 4.635588574 | Up | 3.61E-28    | 6.97E-28    |
| mmu-miR-592-5p    | 1 | 28  | 0.03 | 0.7   | 4.544320516 | Up | 3.05E-06    | 4.81E-06    |
| mmu-miR-3095-3p   | 2 | 56  | 0.07 | 1.4   | 4.321928095 | Up | 1.47E-11    | 2.57E-11    |
| mmu-miR-128-2-5p  | 2 | 55  | 0.07 | 1.38  | 4.301169535 | Up | 2.47E-11    | 4.30E-11    |
| mmu-miR-26a-1-3p  | 1 | 23  | 0.03 | 0.58  | 4.273018494 | Up | 4.03E-05    | 5.92E-05    |
| mmu-miR-324-3p    | 2 | 54  | 0.07 | 1.35  | 4.269460675 | Up | 4.14E-11    | 7.20E-11    |
| mmu-miR-369-3p    | 1 | 21  | 0.03 | 0.53  | 4.142957954 | Up | 0.000112155 | 0.000160037 |
| mmu-miR-132-3p    | 2 | 46  | 0.07 | 1.15  | 4.038135129 | Up | 2.53E-09    | 4.28E-09    |
| mmu-miR-455-5p    | 4 | 92  | 0.14 | 2.3   | 4.038135129 | Up | 1.31E-17    | 2.39E-17    |
| mmu-miR-7212-5p   | 1 | 19  | 0.03 | 0.48  | 4           | Up | 0.000309914 | 0.000421165 |
| mmu-miR-200a-5p   | 1 | 19  | 0.03 | 0.48  | 4           | Up | 0.000309914 | 0.000420652 |
| mmu-miR-491-5p    | 1 | 19  | 0.03 | 0.48  | 4           | Up | 0.000309914 | 0.000420139 |
| mmu-miR-1934-3p   | 2 | 39  | 0.07 | 0.98  | 3.807354922 | Up | 8.84E-08    | 1.46E-07    |
| mmu-miR-2137      | 2 | 34  | 0.07 | 0.85  | 3.602036014 | Up | 1.08E-06    | 1.73E-06    |
| mmu-miR-31-3p     | 2 | 32  | 0.07 | 0.8   | 3.514573173 | Up | 2.93E-06    | 4.63E-06    |
| mmu-miR-193a-5p   | 3 | 42  | 0.1  | 1.05  | 3.392317423 | Up | 1.30E-07    | 2.14E-07    |
| mmu-miR-142a-3p   | 9 | 106 | 0.31 | 2.65  | 3.095652239 | Up | 1.87E-16    | 3.36E-16    |
| mmu-miR-324-5p    | 2 | 23  | 0.07 | 0.58  | 3.050626073 | Up | 0.000234688 | 0.000326918 |

|                   |        |       |          |        |              |      |             |             |
|-------------------|--------|-------|----------|--------|--------------|------|-------------|-------------|
| mmu-miR-29b-3p    | 6      | 66    | 0.2      | 1.65   | 3.044394119  | Up   | 2.06E-10    | 3.56E-10    |
| mmu-miR-146b-5p   | 60     | 558   | 2.04     | 13.97  | 2.775690963  | Up   | 3.24E-72    | 7.47E-72    |
| mmu-miR-532-5p    | 1178   | 7657  | 40.12    | 191.67 | 2.256231034  | Up   | 0           | 0           |
| mmu-let-7j        | 148    | 799   | 5.04     | 20     | 1.988504361  | Up   | 4.66E-70    | 1.06E-69    |
| mmu-miR-199a-3p   | 5439   | 27813 | 185.23   | 696.23 | 1.910246202  | Up   | 0           | 0           |
| mmu-miR-330-5p    | 175    | 855   | 5.96     | 21.4   | 1.844226561  | Up   | 5.97E-68    | 1.34E-67    |
| novel mir441      | 7068   | 33011 | 240.7    | 826.35 | 1.779516822  | Up   | 0           | 0           |
| mmu-miR-378c      | 20     | 88    | 0.68     | 2.2    | 1.693896872  | Up   | 1.78E-07    | 2.91E-07    |
| mmu-miR-1188-5p   | 13     | 53    | 0.44     | 1.33   | 1.595850817  | Up   | 0.000124177 | 0.000176964 |
| mmu-miR-184-3p    | 6266   | 21891 | 213.39   | 547.99 | 1.360656997  | Up   | 0           | 0           |
| mmu-miR-219a-2-3p | 205    | 647   | 6.98     | 16.2   | 1.214694872  | Up   | 6.29E-29    | 1.22E-28    |
| mmu-miR-138-5p    | 510    | 1507  | 17.37    | 37.72  | 1.118731922  | Up   | 1.61E-57    | 3.46E-57    |
| mmu-miR-145a-5p   | 687    | 1914  | 23.4     | 47.91  | 1.033818284  | Up   | 3.94E-64    | 8.66E-64    |
| mmu-miR-320-3p    | 11186  | 30999 | 380.94   | 775.99 | 1.026474277  | Up   | 0           | 0           |
| mmu-miR-3074-5p   | 826812 | 28    | 28157.33 | 0.7    | -15.29579609 | Down | 0           | 0           |
| novel mir2        | 856    | 0     | 29.15    | 0.001  | -14.83120826 | Down | 0           | 0           |
| novel mir727      | 849    | 0     | 28.91    | 0.001  | -14.81928099 | Down | 0           | 0           |
| novel mir589      | 731    | 0     | 24.89    | 0.001  | -14.60327861 | Down | 1.86E-273   | 1.17E-272   |
| mmu-miR-342-5p    | 703    | 0     | 23.94    | 0.001  | -14.54713553 | Down | 5.18E-263   | 3.17E-262   |
| novel mir361      | 663    | 0     | 22.58    | 0.001  | -14.46275787 | Down | 4.30E-248   | 2.59E-247   |
| novel mir387      | 642    | 0     | 21.86    | 0.001  | -14.41600578 | Down | 2.93E-240   | 1.74E-239   |
| novel mir201      | 627    | 0     | 21.35    | 0.001  | -14.38194845 | Down | 1.15E-234   | 6.79E-234   |
| novel mir705      | 570    | 0     | 19.41    | 0.001  | -14.2445125  | Down | 2.10E-213   | 1.17E-212   |
| novel mir714      | 555    | 0     | 18.9     | 0.001  | -14.20609861 | Down | 8.26E-208   | 4.55E-207   |
| novel mir580      | 529    | 0     | 18.02    | 0.001  | -14.13731139 | Down | 4.12E-198   | 2.24E-197   |
| novel mir619      | 529    | 0     | 18.02    | 0.001  | -14.13731139 | Down | 4.12E-198   | 2.23E-197   |
| novel mir439      | 517    | 0     | 17.61    | 0.001  | -14.10410729 | Down | 1.23E-193   | 6.63E-193   |
| novel mir147      | 515    | 0     | 17.54    | 0.001  | -14.09836113 | Down | 6.87E-193   | 3.67E-192   |
| novel mir774      | 510    | 0     | 17.37    | 0.001  | -14.08431013 | Down | 5.03E-191   | 2.67E-190   |
| novel mir154      | 509    | 0     | 17.33    | 0.001  | -14.08098403 | Down | 1.19E-190   | 6.27E-190   |
| novel mir57       | 508    | 0     | 17.3     | 0.001  | -14.07848442 | Down | 2.80E-190   | 1.47E-189   |
| novel mir485      | 498    | 0     | 16.96    | 0.001  | -14.04984855 | Down | 1.51E-186   | 7.76E-186   |
| novel mir596      | 492    | 0     | 16.76    | 0.001  | -14.03273453 | Down | 2.60E-184   | 1.33E-183   |
| novel mir121      | 485    | 0     | 16.52    | 0.001  | -14.01192607 | Down | 1.06E-181   | 5.38E-181   |
| novel mir330      | 483    | 0     | 16.45    | 0.001  | -14.00579996 | Down | 5.92E-181   | 2.98E-180   |
| novel mir30       | 472    | 0     | 16.07    | 0.001  | -13.97208231 | Down | 7.51E-177   | 3.68E-176   |



|                 |     |   |       |       |              |      |           |           |
|-----------------|-----|---|-------|-------|--------------|------|-----------|-----------|
| novel mir518    | 463 | 0 | 15.77 | 0.001 | -13.94489504 | Down | 1.71E-173 | 8.26E-173 |
| novel mir741    | 462 | 0 | 15.73 | 0.001 | -13.94123105 | Down | 4.03E-173 | 1.94E-172 |
| novel mir345    | 461 | 0 | 15.7  | 0.001 | -13.93847694 | Down | 9.51E-173 | 4.55E-172 |
| novel mir755    | 456 | 0 | 15.53 | 0.001 | -13.92277021 | Down | 6.97E-171 | 3.30E-170 |
| novel mir194    | 456 | 0 | 15.53 | 0.001 | -13.92277021 | Down | 6.97E-171 | 3.29E-170 |
| novel mir508    | 455 | 0 | 15.5  | 0.001 | -13.9199806  | Down | 1.65E-170 | 7.73E-170 |
| novel mir686    | 451 | 0 | 15.36 | 0.001 | -13.9068906  | Down | 5.11E-169 | 2.38E-168 |
| novel mir183    | 442 | 0 | 15.05 | 0.001 | -13.87747587 | Down | 1.16E-165 | 5.37E-165 |
| novel mir401    | 439 | 0 | 14.95 | 0.001 | -13.86785786 | Down | 1.53E-164 | 7.03E-164 |
| novel mir709    | 438 | 0 | 14.92 | 0.001 | -13.86495992 | Down | 3.61E-164 | 1.65E-163 |
| novel mir273    | 438 | 0 | 14.92 | 0.001 | -13.86495992 | Down | 3.61E-164 | 1.65E-163 |
| novel mir593    | 436 | 0 | 14.85 | 0.001 | -13.85817531 | Down | 2.01E-163 | 9.09E-163 |
| mmu-miR-6919-3p | 431 | 0 | 14.68 | 0.001 | -13.84156435 | Down | 1.47E-161 | 6.61E-161 |
| novel mir315    | 426 | 0 | 14.51 | 0.001 | -13.8247599  | Down | 1.08E-159 | 4.79E-159 |
| novel mir44     | 424 | 0 | 14.44 | 0.001 | -13.81778312 | Down | 6.01E-159 | 2.66E-158 |
| novel mir600    | 421 | 0 | 14.34 | 0.001 | -13.8077574  | Down | 7.91E-158 | 3.48E-157 |
| novel mir443    | 417 | 0 | 14.2  | 0.001 | -13.79360331 | Down | 2.46E-156 | 1.08E-155 |
| novel mir103    | 416 | 0 | 14.17 | 0.001 | -13.79055214 | Down | 5.80E-156 | 2.53E-155 |
| novel mir516    | 414 | 0 | 14.1  | 0.001 | -13.78340754 | Down | 3.23E-155 | 1.40E-154 |
| novel mir324    | 412 | 0 | 14.03 | 0.001 | -13.77622739 | Down | 1.80E-154 | 7.79E-154 |
| novel mir435    | 411 | 0 | 14    | 0.001 | -13.77313921 | Down | 4.25E-154 | 1.83E-153 |
| novel mir326    | 411 | 0 | 14    | 0.001 | -13.77313921 | Down | 4.25E-154 | 1.82E-153 |
| novel mir533    | 409 | 0 | 13.93 | 0.001 | -13.76590764 | Down | 2.37E-153 | 1.01E-152 |
| novel mir354    | 406 | 0 | 13.83 | 0.001 | -13.75551354 | Down | 3.11E-152 | 1.32E-151 |
| novel mir751    | 403 | 0 | 13.72 | 0.001 | -13.74399286 | Down | 4.09E-151 | 1.73E-150 |
| novel mir368    | 403 | 0 | 13.72 | 0.001 | -13.74399286 | Down | 4.09E-151 | 1.72E-150 |
| novel mir208    | 402 | 0 | 13.69 | 0.001 | -13.74083483 | Down | 9.66E-151 | 4.04E-150 |
| novel mir411    | 400 | 0 | 13.62 | 0.001 | -13.73343908 | Down | 5.38E-150 | 2.24E-149 |
| novel mir592    | 397 | 0 | 13.52 | 0.001 | -13.72280753 | Down | 7.08E-149 | 2.94E-148 |
| novel mir693    | 397 | 0 | 13.52 | 0.001 | -13.72280753 | Down | 7.08E-149 | 2.93E-148 |
| novel mir552    | 395 | 0 | 13.45 | 0.001 | -13.71531855 | Down | 3.94E-148 | 1.63E-147 |
| novel mir472    | 393 | 0 | 13.38 | 0.001 | -13.7077905  | Down | 2.20E-147 | 9.02E-147 |
| novel mir469    | 392 | 0 | 13.35 | 0.001 | -13.70455212 | Down | 5.19E-147 | 2.12E-146 |
| mmu-miR-7002-5p | 391 | 0 | 13.32 | 0.001 | -13.70130646 | Down | 1.22E-146 | 4.99E-146 |
| novel mir432    | 387 | 0 | 13.18 | 0.001 | -13.68606275 | Down | 3.80E-145 | 1.54E-144 |
| novel mir448    | 386 | 0 | 13.15 | 0.001 | -13.68277518 | Down | 8.97E-145 | 3.63E-144 |

|                |     |   |       |       |              |      |           |           |
|----------------|-----|---|-------|-------|--------------|------|-----------|-----------|
| novel mir204   | 384 | 0 | 13.08 | 0.001 | -13.67507492 | Down | 5.00E-144 | 2.02E-143 |
| novel mir680   | 383 | 0 | 13.04 | 0.001 | -13.67065625 | Down | 1.18E-143 | 4.74E-143 |
| novel mir638   | 381 | 0 | 12.98 | 0.001 | -13.66400276 | Down | 6.57E-143 | 2.63E-142 |
| novel mir551   | 380 | 0 | 12.94 | 0.001 | -13.65955    | Down | 1.55E-142 | 6.19E-142 |
| novel mir490   | 380 | 0 | 12.94 | 0.001 | -13.65955    | Down | 1.55E-142 | 6.17E-142 |
| novel mir386   | 376 | 0 | 12.8  | 0.001 | -13.64385619 | Down | 4.82E-141 | 1.88E-140 |
| novel mir69    | 376 | 0 | 12.8  | 0.001 | -13.64385619 | Down | 4.82E-141 | 1.87E-140 |
| novel mir617   | 365 | 0 | 12.43 | 0.001 | -13.60153868 | Down | 6.11E-137 | 2.35E-136 |
| novel mir275   | 362 | 0 | 12.33 | 0.001 | -13.58988518 | Down | 8.03E-136 | 3.07E-135 |
| novel mir274   | 362 | 0 | 12.33 | 0.001 | -13.58988518 | Down | 8.03E-136 | 3.06E-135 |
| novel mir241   | 360 | 0 | 12.26 | 0.001 | -13.58167136 | Down | 4.47E-135 | 1.70E-134 |
| novel mir260   | 359 | 0 | 12.23 | 0.001 | -13.57813678 | Down | 1.06E-134 | 4.00E-134 |
| mmu-miR-411-3p | 357 | 0 | 12.16 | 0.001 | -13.56985561 | Down | 5.88E-134 | 2.21E-133 |
| novel mir213   | 351 | 0 | 11.95 | 0.001 | -13.544723   | Down | 1.02E-131 | 3.80E-131 |
| novel mir293   | 351 | 0 | 11.95 | 0.001 | -13.544723   | Down | 1.02E-131 | 3.79E-131 |
| novel mir418   | 349 | 0 | 11.89 | 0.001 | -13.53746109 | Down | 5.67E-131 | 2.10E-130 |
| novel mir554   | 348 | 0 | 11.85 | 0.001 | -13.53259944 | Down | 1.34E-130 | 4.92E-130 |
| novel mir481   | 348 | 0 | 11.85 | 0.001 | -13.53259944 | Down | 1.34E-130 | 4.90E-130 |
| novel mir350   | 347 | 0 | 11.82 | 0.001 | -13.52894242 | Down | 3.16E-130 | 1.15E-129 |
| novel mir590   | 345 | 0 | 11.75 | 0.001 | -13.52037314 | Down | 1.76E-129 | 6.40E-129 |
| novel mir476   | 345 | 0 | 11.75 | 0.001 | -13.52037314 | Down | 1.76E-129 | 6.38E-129 |
| novel mir235   | 345 | 0 | 11.75 | 0.001 | -13.52037314 | Down | 1.76E-129 | 6.36E-129 |
| novel mir344   | 343 | 0 | 11.68 | 0.001 | -13.51175265 | Down | 9.81E-129 | 3.53E-128 |
| novel mir176   | 342 | 0 | 11.65 | 0.001 | -13.50804233 | Down | 2.31E-128 | 8.31E-128 |
| novel mir573   | 341 | 0 | 11.61 | 0.001 | -13.50308035 | Down | 5.46E-128 | 1.96E-127 |
| novel mir349   | 337 | 0 | 11.48 | 0.001 | -13.48683502 | Down | 1.70E-126 | 6.01E-126 |
| novel mir497   | 337 | 0 | 11.48 | 0.001 | -13.48683502 | Down | 1.70E-126 | 5.99E-126 |
| novel mir190   | 336 | 0 | 11.44 | 0.001 | -13.48179943 | Down | 4.00E-126 | 1.41E-125 |
| novel mir164   | 336 | 0 | 11.44 | 0.001 | -13.48179943 | Down | 4.00E-126 | 1.41E-125 |
| novel mir320   | 333 | 0 | 11.34 | 0.001 | -13.46913302 | Down | 5.27E-125 | 1.83E-124 |
| novel mir694   | 333 | 0 | 11.34 | 0.001 | -13.46913302 | Down | 5.27E-125 | 1.82E-124 |
| novel mir98    | 330 | 0 | 11.24 | 0.001 | -13.45635442 | Down | 6.93E-124 | 2.39E-123 |
| mmu-miR-5100   | 329 | 0 | 11.2  | 0.001 | -13.45121111 | Down | 1.63E-123 | 5.60E-123 |
| novel mir228   | 329 | 0 | 11.2  | 0.001 | -13.45121111 | Down | 1.63E-123 | 5.58E-123 |
| novel mir640   | 329 | 0 | 11.2  | 0.001 | -13.45121111 | Down | 1.63E-123 | 5.56E-123 |
| novel mir738   | 326 | 0 | 11.1  | 0.001 | -13.43827206 | Down | 2.15E-122 | 7.25E-122 |

|                 |     |   |       |       |              |      |           |           |
|-----------------|-----|---|-------|-------|--------------|------|-----------|-----------|
| novel mir599    | 325 | 0 | 11.07 | 0.001 | -13.4343676  | Down | 5.07E-122 | 1.71E-121 |
| novel mir486    | 324 | 0 | 11.03 | 0.001 | -13.42914517 | Down | 1.20E-121 | 4.00E-121 |
| novel mir282    | 324 | 0 | 11.03 | 0.001 | -13.42914517 | Down | 1.20E-121 | 3.99E-121 |
| novel mir316    | 323 | 0 | 11    | 0.001 | -13.4252159  | Down | 2.83E-121 | 9.37E-121 |
| novel mir772    | 322 | 0 | 10.97 | 0.001 | -13.42127591 | Down | 6.67E-121 | 2.20E-120 |
| novel mir606    | 317 | 0 | 10.8  | 0.001 | -13.39874369 | Down | 4.89E-119 | 1.61E-118 |
| novel mir558    | 317 | 0 | 10.8  | 0.001 | -13.39874369 | Down | 4.89E-119 | 1.60E-118 |
| novel mir304    | 316 | 0 | 10.76 | 0.001 | -13.39339046 | Down | 1.15E-118 | 3.77E-118 |
| novel mir698    | 316 | 0 | 10.76 | 0.001 | -13.39339046 | Down | 1.15E-118 | 3.76E-118 |
| novel mir247    | 314 | 0 | 10.69 | 0.001 | -13.38397423 | Down | 6.43E-118 | 2.09E-117 |
| novel mir177    | 314 | 0 | 10.69 | 0.001 | -13.38397423 | Down | 6.43E-118 | 2.08E-117 |
| mmu-miR-6952-3p | 313 | 0 | 10.66 | 0.001 | -13.37991982 | Down | 1.52E-117 | 4.90E-117 |
| novel mir75     | 312 | 0 | 10.63 | 0.001 | -13.37585398 | Down | 3.58E-117 | 1.15E-116 |
| novel mir226    | 312 | 0 | 10.63 | 0.001 | -13.37585398 | Down | 3.58E-117 | 1.15E-116 |
| novel mir64     | 307 | 0 | 10.45 | 0.001 | -13.35121532 | Down | 2.63E-115 | 8.33E-115 |
| novel mir181    | 306 | 0 | 10.42 | 0.001 | -13.34706766 | Down | 6.20E-115 | 1.96E-114 |
| novel mir140    | 306 | 0 | 10.42 | 0.001 | -13.34706766 | Down | 6.20E-115 | 1.95E-114 |
| novel mir182    | 306 | 0 | 10.42 | 0.001 | -13.34706766 | Down | 6.20E-115 | 1.95E-114 |
| novel mir341    | 303 | 0 | 10.32 | 0.001 | -13.33315535 | Down | 8.15E-114 | 2.55E-113 |
| novel mir419    | 301 | 0 | 10.25 | 0.001 | -13.32333629 | Down | 4.54E-113 | 1.42E-112 |
| novel mir740    | 297 | 0 | 10.11 | 0.001 | -13.30349538 | Down | 1.41E-111 | 4.35E-111 |
| novel mir662    | 297 | 0 | 10.11 | 0.001 | -13.30349538 | Down | 1.41E-111 | 4.34E-111 |
| novel mir407    | 297 | 0 | 10.11 | 0.001 | -13.30349538 | Down | 1.41E-111 | 4.32E-111 |
| novel mir743    | 295 | 0 | 10.05 | 0.001 | -13.29490788 | Down | 7.86E-111 | 2.40E-110 |
| novel mir218    | 293 | 0 | 9.98  | 0.001 | -13.2848241  | Down | 4.38E-110 | 1.33E-109 |
| novel mir701    | 293 | 0 | 9.98  | 0.001 | -13.2848241  | Down | 4.38E-110 | 1.33E-109 |
| novel mir690    | 290 | 0 | 9.88  | 0.001 | -13.27029533 | Down | 5.76E-109 | 1.74E-108 |
| novel mir595    | 288 | 0 | 9.81  | 0.001 | -13.26003742 | Down | 3.21E-108 | 9.65E-108 |
| novel mir289    | 288 | 0 | 9.81  | 0.001 | -13.26003742 | Down | 3.21E-108 | 9.62E-108 |
| novel mir588    | 287 | 0 | 9.77  | 0.001 | -13.25414285 | Down | 7.57E-108 | 2.25E-107 |
| novel mir149    | 284 | 0 | 9.67  | 0.001 | -13.23930017 | Down | 9.96E-107 | 2.95E-106 |
| novel mir586    | 283 | 0 | 9.64  | 0.001 | -13.23481743 | Down | 2.35E-106 | 6.92E-106 |
| novel mir636    | 278 | 0 | 9.47  | 0.001 | -13.20914871 | Down | 1.72E-104 | 5.02E-104 |
| novel mir415    | 278 | 0 | 9.47  | 0.001 | -13.20914871 | Down | 1.72E-104 | 5.00E-104 |
| novel mir394    | 278 | 0 | 9.47  | 0.001 | -13.20914871 | Down | 1.72E-104 | 4.99E-104 |
| novel mir198    | 277 | 0 | 9.43  | 0.001 | -13.20304206 | Down | 4.07E-104 | 1.18E-103 |

|                 |     |   |      |       |              |      |           |           |
|-----------------|-----|---|------|-------|--------------|------|-----------|-----------|
| novel mir308    | 276 | 0 | 9.4  | 0.001 | -13.19844504 | Down | 9.60E-104 | 2.76E-103 |
| novel mir237    | 271 | 0 | 9.23 | 0.001 | -13.17211493 | Down | 7.03E-102 | 2.01E-101 |
| novel mir771    | 270 | 0 | 9.19 | 0.001 | -13.16584915 | Down | 1.66E-101 | 4.72E-101 |
| novel mir483    | 268 | 0 | 9.13 | 0.001 | -13.15639914 | Down | 9.25E-101 | 2.62E-100 |
| novel mir90     | 267 | 0 | 9.09 | 0.001 | -13.15006458 | Down | 2.18E-100 | 6.17E-100 |
| novel mir78     | 264 | 0 | 8.99 | 0.001 | -13.1341054  | Down | 2.87E-99  | 8.09E-99  |
| novel mir187    | 263 | 0 | 8.96 | 0.001 | -13.12928302 | Down | 6.78E-99  | 1.90E-98  |
| novel mir302    | 262 | 0 | 8.92 | 0.001 | -13.12282799 | Down | 1.60E-98  | 4.48E-98  |
| novel mir58     | 262 | 0 | 8.92 | 0.001 | -13.12282799 | Down | 1.60E-98  | 4.47E-98  |
| novel mir427    | 259 | 0 | 8.82 | 0.001 | -13.10656294 | Down | 2.10E-97  | 5.87E-97  |
| novel mir109    | 259 | 0 | 8.82 | 0.001 | -13.10656294 | Down | 2.10E-97  | 5.85E-97  |
| novel mir131    | 257 | 0 | 8.75 | 0.001 | -13.0950673  | Down | 1.17E-96  | 3.24E-96  |
| novel mir55     | 256 | 0 | 8.72 | 0.001 | -13.09011242 | Down | 2.77E-96  | 7.64E-96  |
| novel mir560    | 256 | 0 | 8.72 | 0.001 | -13.09011242 | Down | 2.77E-96  | 7.62E-96  |
| novel mir77     | 255 | 0 | 8.68 | 0.001 | -13.08347933 | Down | 6.53E-96  | 1.79E-95  |
| novel mir712    | 254 | 0 | 8.65 | 0.001 | -13.07848442 | Down | 1.54E-95  | 4.23E-95  |
| novel mir150    | 254 | 0 | 8.65 | 0.001 | -13.07848442 | Down | 1.54E-95  | 4.21E-95  |
| novel mir348    | 254 | 0 | 8.65 | 0.001 | -13.07848442 | Down | 1.54E-95  | 4.20E-95  |
| novel mir114    | 253 | 0 | 8.62 | 0.001 | -13.07347215 | Down | 3.64E-95  | 9.90E-95  |
| novel mir172    | 253 | 0 | 8.62 | 0.001 | -13.07347215 | Down | 3.64E-95  | 9.88E-95  |
| novel mir630    | 251 | 0 | 8.55 | 0.001 | -13.0617087  | Down | 2.03E-94  | 5.49E-94  |
| mmu-miR-6994-3p | 251 | 0 | 8.55 | 0.001 | -13.0617087  | Down | 2.03E-94  | 5.48E-94  |
| novel mir38     | 249 | 0 | 8.48 | 0.001 | -13.04984855 | Down | 1.13E-93  | 3.04E-93  |
| novel mir167    | 248 | 0 | 8.45 | 0.001 | -13.04473563 | Down | 2.67E-93  | 7.15E-93  |
| mmu-miR-7030-3p | 247 | 0 | 8.41 | 0.001 | -13.03789009 | Down | 6.29E-93  | 1.68E-92  |
| novel mir60     | 245 | 0 | 8.34 | 0.001 | -13.02583167 | Down | 3.51E-92  | 9.31E-92  |
| mmu-miR-3071-3p | 243 | 0 | 8.28 | 0.001 | -13.01541505 | Down | 1.95E-91  | 5.18E-91  |
| novel mir225    | 242 | 0 | 8.24 | 0.001 | -13.00842862 | Down | 4.61E-91  | 1.22E-90  |
| novel mir37     | 240 | 0 | 8.17 | 0.001 | -12.99612036 | Down | 2.57E-90  | 6.74E-90  |
| novel mir562    | 239 | 0 | 8.14 | 0.001 | -12.99081308 | Down | 6.06E-90  | 1.58E-89  |
| novel mir621    | 238 | 0 | 8.11 | 0.001 | -12.9854862  | Down | 1.43E-89  | 3.72E-89  |
| novel mir352    | 238 | 0 | 8.11 | 0.001 | -12.9854862  | Down | 1.43E-89  | 3.71E-89  |
| novel mir249    | 237 | 0 | 8.07 | 0.001 | -12.97835296 | Down | 3.38E-89  | 8.75E-89  |
| novel mir717    | 236 | 0 | 8.04 | 0.001 | -12.97297979 | Down | 7.98E-89  | 2.05E-88  |
| novel mir145    | 236 | 0 | 8.04 | 0.001 | -12.97297979 | Down | 7.98E-89  | 2.05E-88  |
| novel mir268    | 235 | 0 | 8    | 0.001 | -12.96578428 | Down | 1.88E-88  | 4.82E-88  |

|                 |     |   |      |       |              |      |          |          |
|-----------------|-----|---|------|-------|--------------|------|----------|----------|
| novel mir205    | 235 | 0 | 8    | 0.001 | -12.96578428 | Down | 1.88E-88 | 4.81E-88 |
| novel mir757    | 235 | 0 | 8    | 0.001 | -12.96578428 | Down | 1.88E-88 | 4.79E-88 |
| novel mir343    | 234 | 0 | 7.97 | 0.001 | -12.96036401 | Down | 4.44E-88 | 1.13E-87 |
| novel mir332    | 229 | 0 | 7.8  | 0.001 | -12.92925841 | Down | 3.26E-86 | 8.20E-86 |
| novel mir166    | 227 | 0 | 7.73 | 0.001 | -12.9162527  | Down | 1.81E-85 | 4.54E-85 |
| novel mir689    | 226 | 0 | 7.7  | 0.001 | -12.91064273 | Down | 4.28E-85 | 1.07E-84 |
| mmu-miR-6953-3p | 226 | 0 | 7.7  | 0.001 | -12.91064273 | Down | 4.28E-85 | 1.07E-84 |
| novel mir360    | 221 | 0 | 7.53 | 0.001 | -12.87843415 | Down | 3.14E-83 | 7.76E-83 |
| novel mir261    | 220 | 0 | 7.49 | 0.001 | -12.87075    | Down | 7.41E-83 | 1.82E-82 |
| novel mir510    | 218 | 0 | 7.42 | 0.001 | -12.85720347 | Down | 4.13E-82 | 1.01E-81 |
| novel mir143    | 215 | 0 | 7.32 | 0.001 | -12.83762793 | Down | 5.43E-81 | 1.32E-80 |
| novel mir745    | 215 | 0 | 7.32 | 0.001 | -12.83762793 | Down | 5.43E-81 | 1.32E-80 |
| novel mir27     | 213 | 0 | 7.25 | 0.001 | -12.82376528 | Down | 3.02E-80 | 7.33E-80 |
| novel mir511    | 210 | 0 | 7.15 | 0.001 | -12.80372753 | Down | 3.98E-79 | 9.58E-79 |
| novel mir87     | 209 | 0 | 7.12 | 0.001 | -12.79766153 | Down | 9.39E-79 | 2.26E-78 |
| novel mir323    | 207 | 0 | 7.05 | 0.001 | -12.78340754 | Down | 5.23E-78 | 1.25E-77 |
| novel mir436    | 206 | 0 | 7.02 | 0.001 | -12.77725532 | Down | 1.23E-77 | 2.96E-77 |
| novel mir134    | 206 | 0 | 7.02 | 0.001 | -12.77725532 | Down | 1.23E-77 | 2.95E-77 |
| mmu-miR-764-5p  | 205 | 0 | 6.98 | 0.001 | -12.76901132 | Down | 2.91E-77 | 6.95E-77 |
| mmu-miR-154-3p  | 204 | 0 | 6.95 | 0.001 | -12.76279726 | Down | 6.88E-77 | 1.63E-76 |
| novel mir223    | 201 | 0 | 6.85 | 0.001 | -12.74188827 | Down | 9.05E-76 | 2.12E-75 |
| novel mir210    | 200 | 0 | 6.81 | 0.001 | -12.73343908 | Down | 2.14E-75 | 5.00E-75 |
| novel mir532    | 199 | 0 | 6.78 | 0.001 | -12.72706956 | Down | 5.04E-75 | 1.18E-74 |
| novel mir382    | 196 | 0 | 6.67 | 0.001 | -12.70347105 | Down | 6.63E-74 | 1.54E-73 |
| novel mir642    | 195 | 0 | 6.64 | 0.001 | -12.69696753 | Down | 1.56E-73 | 3.64E-73 |
| novel mir463    | 193 | 0 | 6.57 | 0.001 | -12.68167766 | Down | 8.72E-73 | 2.02E-72 |
| novel mir81     | 189 | 0 | 6.44 | 0.001 | -12.65284497 | Down | 2.71E-71 | 6.22E-71 |
| novel mir165    | 189 | 0 | 6.44 | 0.001 | -12.65284497 | Down | 2.71E-71 | 6.21E-71 |
| novel mir240    | 188 | 0 | 6.4  | 0.001 | -12.64385619 | Down | 6.39E-71 | 1.46E-70 |
| novel mir59     | 181 | 0 | 6.16 | 0.001 | -12.58871464 | Down | 2.61E-68 | 5.88E-68 |
| novel mir438    | 179 | 0 | 6.1  | 0.001 | -12.57459353 | Down | 1.45E-67 | 3.25E-67 |
| novel mir564    | 179 | 0 | 6.1  | 0.001 | -12.57459353 | Down | 1.45E-67 | 3.25E-67 |
| novel mir85     | 179 | 0 | 6.1  | 0.001 | -12.57459353 | Down | 1.45E-67 | 3.24E-67 |
| novel mir207    | 175 | 0 | 5.96 | 0.001 | -12.54109662 | Down | 4.51E-66 | 1.00E-65 |
| novel mir627    | 175 | 0 | 5.96 | 0.001 | -12.54109662 | Down | 4.51E-66 | 1.00E-65 |
| novel mir412    | 173 | 0 | 5.89 | 0.001 | -12.52405192 | Down | 2.51E-65 | 5.56E-65 |

|                 |     |   |      |       |              |      |          |          |
|-----------------|-----|---|------|-------|--------------|------|----------|----------|
| novel mir220    | 173 | 0 | 5.89 | 0.001 | -12.52405192 | Down | 2.51E-65 | 5.55E-65 |
| novel mir505    | 173 | 0 | 5.89 | 0.001 | -12.52405192 | Down | 2.51E-65 | 5.54E-65 |
| mmu-miR-1982-3p | 166 | 0 | 5.65 | 0.001 | -12.46403515 | Down | 1.03E-62 | 2.25E-62 |
| novel mir732    | 165 | 0 | 5.62 | 0.001 | -12.45635442 | Down | 2.42E-62 | 5.30E-62 |
| novel mir667    | 164 | 0 | 5.59 | 0.001 | -12.44863257 | Down | 5.72E-62 | 1.25E-61 |
| novel mir203    | 161 | 0 | 5.48 | 0.001 | -12.41996018 | Down | 7.52E-61 | 1.63E-60 |
| novel mir535    | 157 | 0 | 5.35 | 0.001 | -12.38532318 | Down | 2.33E-59 | 5.06E-59 |
| novel mir318    | 156 | 0 | 5.31 | 0.001 | -12.37449615 | Down | 5.51E-59 | 1.19E-58 |
| novel mir61     | 156 | 0 | 5.31 | 0.001 | -12.37449615 | Down | 5.51E-59 | 1.19E-58 |
| novel mir538    | 154 | 0 | 5.24 | 0.001 | -12.3553511  | Down | 3.07E-58 | 6.61E-58 |
| novel mir127    | 144 | 0 | 4.9  | 0.001 | -12.25856603 | Down | 1.65E-54 | 3.51E-54 |
| novel mir625    | 143 | 0 | 4.87 | 0.001 | -12.24970606 | Down | 3.89E-54 | 8.27E-54 |
| novel mir159    | 141 | 0 | 4.8  | 0.001 | -12.22881869 | Down | 2.17E-53 | 4.59E-53 |
| novel mir222    | 139 | 0 | 4.73 | 0.001 | -12.20762447 | Down | 1.21E-52 | 2.55E-52 |
| mmu-miR-7034-3p | 138 | 0 | 4.7  | 0.001 | -12.19844504 | Down | 2.85E-52 | 6.01E-52 |
| novel mir267    | 135 | 0 | 4.6  | 0.001 | -12.16741815 | Down | 3.75E-51 | 7.89E-51 |
| mmu-miR-6955-3p | 127 | 0 | 4.33 | 0.001 | -12.08015131 | Down | 3.61E-48 | 7.59E-48 |
| novel mir527    | 125 | 0 | 4.26 | 0.001 | -12.05663772 | Down | 2.01E-47 | 4.21E-47 |
| novel mir212    | 123 | 0 | 4.19 | 0.001 | -12.03273453 | Down | 1.12E-46 | 2.34E-46 |
| novel mir447    | 123 | 0 | 4.19 | 0.001 | -12.03273453 | Down | 1.12E-46 | 2.34E-46 |
| novel mir216    | 122 | 0 | 4.15 | 0.001 | -12.01889562 | Down | 2.65E-46 | 5.51E-46 |
| novel mir313    | 116 | 0 | 3.95 | 0.001 | -11.94763694 | Down | 4.58E-44 | 9.46E-44 |
| novel mir53     | 115 | 0 | 3.92 | 0.001 | -11.93663794 | Down | 1.08E-43 | 2.22E-43 |
| novel mir610    | 108 | 0 | 3.68 | 0.001 | -11.84549005 | Down | 4.41E-41 | 9.01E-41 |
| novel mir695    | 103 | 0 | 3.51 | 0.001 | -11.77725532 | Down | 3.23E-39 | 6.52E-39 |
| novel mir329    | 99  | 0 | 3.37 | 0.001 | -11.71853288 | Down | 1.00E-37 | 2.01E-37 |
| mmu-miR-7058-3p | 95  | 0 | 3.24 | 0.001 | -11.6617781  | Down | 3.12E-36 | 6.21E-36 |
| novel mir754    | 94  | 0 | 3.2  | 0.001 | -11.64385619 | Down | 7.36E-36 | 1.46E-35 |
| novel mir283    | 90  | 0 | 3.06 | 0.001 | -11.57931594 | Down | 2.28E-34 | 4.52E-34 |
| novel mir659    | 88  | 0 | 3    | 0.001 | -11.55074679 | Down | 1.27E-33 | 2.51E-33 |
| novel mir647    | 84  | 0 | 2.86 | 0.001 | -11.48179943 | Down | 3.95E-32 | 7.71E-32 |
| novel mir420    | 79  | 0 | 2.69 | 0.001 | -11.39339046 | Down | 2.89E-30 | 5.63E-30 |
| novel mir658    | 76  | 0 | 2.59 | 0.001 | -11.33873638 | Down | 3.81E-29 | 7.39E-29 |
| mmu-miR-6901-3p | 55  | 0 | 1.87 | 0.001 | -10.86882255 | Down | 2.59E-21 | 4.83E-21 |
| novel mir231    | 50  | 0 | 1.7  | 0.001 | -10.73131903 | Down | 1.90E-19 | 3.50E-19 |
| mmu-miR-7070-3p | 45  | 0 | 1.53 | 0.001 | -10.57931594 | Down | 1.39E-17 | 2.53E-17 |

|                  |         |       |          |        |              |      |           |           |
|------------------|---------|-------|----------|--------|--------------|------|-----------|-----------|
| novel mir200     | 34      | 0     | 1.16     | 0.001  | -10.17990909 | Down | 1.76E-13  | 3.11E-13  |
| mmu-miR-532-3p   | 868     | 1     | 29.56    | 0.03   | -9.944468053 | Down | 0         | 0         |
| novel mir265     | 24      | 0     | 0.82     | 0.001  | -9.6794801   | Down | 9.47E-10  | 1.62E-09  |
| novel mir73      | 23      | 0     | 0.78     | 0.001  | -9.607330314 | Down | 2.23E-09  | 3.80E-09  |
| mmu-miR-199b-3p  | 419760  | 746   | 14295.05 | 18.67  | -9.580578023 | Down | 0         | 0         |
| mmu-miR-485-3p   | 1118    | 3     | 38.07    | 0.08   | -8.894438855 | Down | 0         | 0         |
| novel mir408     | 13      | 0     | 0.44     | 0.001  | -8.781359714 | Down | 1.20E-05  | 1.83E-05  |
| novel mir129     | 13      | 0     | 0.44     | 0.001  | -8.781359714 | Down | 1.20E-05  | 1.83E-05  |
| mmu-miR-7021-5p  | 470     | 2     | 16.01    | 0.05   | -8.322829498 | Down | 1.56E-171 | 7.40E-171 |
| mmu-miR-466d-3p  | 619     | 3     | 21.08    | 0.08   | -8.041659152 | Down | 8.56E-225 | 4.88E-224 |
| mmu-miR-98-3p    | 321     | 2     | 10.93    | 0.05   | -7.772149591 | Down | 2.75E-116 | 8.77E-116 |
| mmu-miR-3077-3p  | 281     | 2     | 9.57     | 0.05   | -7.58044702  | Down | 1.76E-101 | 4.99E-101 |
| novel mir507     | 1396    | 11    | 47.54    | 0.28   | -7.407571266 | Down | 0         | 0         |
| mmu-miR-299b-3p  | 366     | 3     | 12.46    | 0.08   | -7.283088353 | Down | 4.17E-131 | 1.55E-130 |
| mmu-miR-329-3p   | 1079    | 10    | 36.75    | 0.25   | -7.199672345 | Down | 0         | 0         |
| mmu-miR-7681-5p  | 215     | 2     | 7.32     | 0.05   | -7.193771743 | Down | 4.29E-77  | 1.02E-76  |
| mmu-miR-7115-3p  | 800     | 8     | 27.24    | 0.2    | -7.089582893 | Down | 1.84E-282 | 1.19E-281 |
| mmu-miR-1249-3p  | 1709    | 17    | 58.2     | 0.43   | -7.080538683 | Down | 0         | 0         |
| mmu-miR-495-3p   | 1555    | 17    | 52.96    | 0.43   | -6.944422652 | Down | 0         | 0         |
| mmu-miR-148b-3p  | 669     | 9     | 22.78    | 0.23   | -6.629990076 | Down | 1.41E-232 | 8.28E-232 |
| mmu-miR-335-3p   | 1821    | 25    | 62.01    | 0.63   | -6.621005251 | Down | 0         | 0         |
| mmu-miR-669c-5p  | 2122    | 30    | 72.27    | 0.75   | -6.590362488 | Down | 0         | 0         |
| mmu-miR-466h-3p  | 6225    | 88    | 211.99   | 2.2    | -6.590348878 | Down | 0         | 0         |
| mmu-let-7b-3p    | 4824    | 69    | 164.28   | 1.73   | -6.569241004 | Down | 0         | 0         |
| mmu-miR-24-3p    | 1965736 | 30462 | 66943.73 | 762.54 | -6.45599211  | Down | 0         | 0         |
| mmu-miR-122-3p   | 1028    | 16    | 35.01    | 0.4    | -6.451623252 | Down | 0         | 0         |
| mmu-miR-136-3p   | 254     | 4     | 8.65     | 0.1    | -6.434628228 | Down | 3.15E-88  | 8.01E-88  |
| mmu-miR-7031-5p  | 502     | 8     | 17.1     | 0.2    | -6.417852515 | Down | 6.52E-173 | 3.13E-172 |
| mmu-miR-486b-5p  | 76698   | 1230  | 2611.97  | 30.79  | -6.406532649 | Down | 0         | 0         |
| mmu-miR-574-3p   | 57274   | 941   | 1950.48  | 23.56  | -6.371345856 | Down | 0         | 0         |
| mmu-miR-335-5p   | 308     | 5     | 10.49    | 0.13   | -6.334359244 | Down | 1.76E-106 | 5.21E-106 |
| mmu-miR-669o-3p  | 522     | 9     | 17.78    | 0.23   | -6.272477653 | Down | 1.05E-178 | 5.20E-178 |
| mmu-miR-1843a-3p | 3360    | 71    | 114.43   | 1.78   | -6.00644428  | Down | 0         | 0         |
| mmu-miR-204-3p   | 836     | 18    | 28.47    | 0.45   | -5.983373681 | Down | 4.97E-280 | 3.16E-279 |
| mmu-miR-211-5p   | 969     | 21    | 33       | 0.53   | -5.960329855 | Down | 0         | 0         |
| mmu-miR-6538     | 3948    | 91    | 134.45   | 2.28   | -5.881892121 | Down | 0         | 0         |

|                 |        |       |          |        |              |      |           |           |
|-----------------|--------|-------|----------|--------|--------------|------|-----------|-----------|
| novel mir23     | 425    | 10    | 14.47    | 0.25   | -5.854993017 | Down | 6.46E-142 | 2.54E-141 |
| mmu-miR-214-3p  | 3450   | 83    | 117.49   | 2.08   | -5.81981063  | Down | 0         | 0         |
| mmu-miR-339-5p  | 2081   | 51    | 70.87    | 1.28   | -5.790959334 | Down | 0         | 0         |
| mmu-miR-363-5p  | 290    | 7     | 9.88     | 0.18   | -5.77844223  | Down | 4.77E-97  | 1.33E-96  |
| mmu-miR-484     | 326990 | 8379  | 11135.74 | 209.75 | -5.730382811 | Down | 0         | 0         |
| mmu-miR-6924-5p | 462    | 12    | 15.73    | 0.3    | -5.71241236  | Down | 1.32E-152 | 5.61E-152 |
| mmu-miR-664-3p  | 7023   | 184   | 239.17   | 4.61   | -5.697125877 | Down | 0         | 0         |
| mmu-miR-466f-3p | 692    | 19    | 23.57    | 0.48   | -5.617773543 | Down | 1.93E-226 | 1.11E-225 |
| mmu-miR-1306-5p | 3075   | 87    | 104.72   | 2.18   | -5.586065057 | Down | 0         | 0         |
| mmu-miR-669f-3p | 234    | 7     | 7.97     | 0.18   | -5.468510913 | Down | 8.48E-77  | 2.00E-76  |
| mmu-miR-7658-5p | 386    | 12    | 13.15    | 0.3    | -5.453956489 | Down | 3.55E-125 | 1.23E-124 |
| mmu-miR-1981-3p | 1371   | 45    | 46.69    | 1.13   | -5.368718911 | Down | 0         | 0         |
| novel mir141    | 836    | 28    | 28.47    | 0.7    | -5.345943761 | Down | 9.48E-267 | 5.86E-266 |
| mmu-miR-142a-5p | 1952   | 66    | 66.48    | 1.65   | -5.332382453 | Down | 0         | 0         |
| mmu-miR-337-5p  | 340    | 12    | 11.58    | 0.3    | -5.270528942 | Down | 1.15E-108 | 3.47E-108 |
| mmu-miR-7658-3p | 958    | 34    | 32.62    | 0.85   | -5.262150131 | Down | 4.51E-303 | 2.97E-302 |
| mmu-miR-467a-5p | 2002   | 73    | 68.18    | 1.83   | -5.219433046 | Down | 0         | 0         |
| mmu-miR-8091    | 249    | 9     | 8.48     | 0.23   | -5.204358499 | Down | 1.02E-79  | 2.47E-79  |
| mmu-miR-6948-3p | 514    | 19    | 17.5     | 0.48   | -5.188176706 | Down | 1.87E-162 | 8.43E-162 |
| novel mir607    | 342    | 13    | 11.65    | 0.33   | -5.14172012  | Down | 3.50E-108 | 1.05E-107 |
| mmu-let-7d-3p   | 829655 | 33041 | 28254.15 | 827.1  | -5.094257209 | Down | 0         | 0         |
| mmu-let-7f-1-3p | 8696   | 348   | 296.14   | 8.71   | -5.087462841 | Down | 0         | 0         |
| mmu-miR-1964-3p | 971    | 40    | 33.07    | 1      | -5.04745114  | Down | 1.41E-300 | 9.23E-300 |
| mmu-miR-126a-5p | 2565   | 107   | 87.35    | 2.68   | -5.026502797 | Down | 0         | 0         |
| mmu-miR-34b-3p  | 1882   | 80    | 64.09    | 2      | -5.002027365 | Down | 0         | 0         |
| mmu-miR-202-5p  | 425    | 19    | 14.47    | 0.48   | -4.913886706 | Down | 8.67E-131 | 3.20E-130 |
| mmu-miR-144-3p  | 9264   | 426   | 315.49   | 10.66  | -4.887314934 | Down | 0         | 0         |
| mmu-miR-124-3p  | 1460   | 67    | 49.72    | 1.68   | -4.887293158 | Down | 0         | 0         |
| mmu-miR-543-3p  | 1410   | 65    | 48.02    | 1.63   | -4.880691534 | Down | 0         | 0         |
| mmu-miR-434-5p  | 1009   | 47    | 34.36    | 1.18   | -4.863871272 | Down | 4.00E-306 | 2.65E-305 |
| novel mir555    | 467    | 22    | 15.9     | 0.55   | -4.853451337 | Down | 2.61E-142 | 1.03E-141 |
| mmu-miR-6943-3p | 467    | 23    | 15.9     | 0.58   | -4.776830055 | Down | 3.22E-141 | 1.26E-140 |
| mmu-miR-101a-3p | 601    | 30    | 20.47    | 0.75   | -4.770476697 | Down | 7.77E-181 | 3.89E-180 |
| mmu-miR-467d-5p | 357    | 18    | 12.16    | 0.45   | -4.756074417 | Down | 7.01E-108 | 2.09E-107 |
| mmu-miR-6956-3p | 301    | 15    | 10.25    | 0.38   | -4.753480681 | Down | 2.17E-91  | 5.74E-91  |
| mmu-miR-877-3p  | 1440   | 74    | 49.04    | 1.85   | -4.728361803 | Down | 0         | 0         |



|                  |       |      |         |        |              |      |           |           |
|------------------|-------|------|---------|--------|--------------|------|-----------|-----------|
| mmu-miR-199a-5p  | 294   | 15   | 10.01   | 0.38   | -4.719298745 | Down | 6.30E-89  | 1.62E-88  |
| mmu-miR-3470b    | 535   | 28   | 18.22   | 0.7    | -4.702024227 | Down | 8.89E-160 | 3.96E-159 |
| mmu-miR-204-5p   | 40468 | 2116 | 1378.15 | 52.97  | -4.701413603 | Down | 0         | 0         |
| mmu-let-7f-2-3p  | 4574  | 254  | 155.77  | 6.36   | -4.614246833 | Down | 0         | 0         |
| mmu-miR-23b-5p   | 2841  | 160  | 96.75   | 4.01   | -4.592587519 | Down | 0         | 0         |
| mmu-miR-16-2-3p  | 819   | 47   | 27.89   | 1.18   | -4.56288917  | Down | 2.19E-239 | 1.30E-238 |
| mmu-miR-26b-3p   | 832   | 48   | 28.33   | 1.2    | -4.561224291 | Down | 6.74E-243 | 4.03E-242 |
| mmu-miR-106b-5p  | 1730  | 100  | 58.92   | 2.5    | -4.55875743  | Down | 0         | 0         |
| novel mir453     | 1020  | 59   | 34.74   | 1.48   | -4.552928673 | Down | 3.19E-297 | 2.08E-296 |
| mmu-miR-127-3p   | 91586 | 5503 | 3118.99 | 137.75 | -4.500954703 | Down | 0         | 0         |
| mmu-miR-152-3p   | 385   | 23   | 13.11   | 0.58   | -4.498470975 | Down | 1.68E-112 | 5.21E-112 |
| novel mir340     | 418   | 25   | 14.24   | 0.63   | -4.498453507 | Down | 5.60E-122 | 1.88E-121 |
| novel mir355     | 416   | 25   | 14.17   | 0.63   | -4.491344119 | Down | 2.78E-121 | 9.24E-121 |
| mmu-miR-29b-1-5p | 618   | 38   | 21.05   | 0.95   | -4.46974891  | Down | 1.66E-178 | 8.17E-178 |
| mmu-miR-350-3p   | 6146  | 382  | 209.3   | 9.56   | -4.452417883 | Down | 0         | 0         |
| mmu-miR-3473g    | 429   | 27   | 14.61   | 0.68   | -4.425277622 | Down | 8.20E-124 | 2.82E-123 |
| mmu-miR-292b-5p  | 238   | 15   | 8.11    | 0.38   | -4.415630591 | Down | 2.29E-69  | 5.20E-69  |
| mmu-miR-134-3p   | 375   | 24   | 12.77   | 0.6    | -4.411652214 | Down | 4.83E-108 | 1.44E-107 |
| mmu-miR-10a-3p   | 497   | 32   | 16.93   | 0.8    | -4.403438163 | Down | 1.80E-142 | 7.13E-142 |
| novel mir41      | 962   | 62   | 32.76   | 1.55   | -4.401595236 | Down | 4.38E-274 | 2.76E-273 |
| novel mir49      | 389   | 25   | 13.25   | 0.63   | -4.394496721 | Down | 6.49E-112 | 2.01E-111 |
| mmu-miR-7687-3p  | 400   | 26   | 13.62   | 0.65   | -4.389143175 | Down | 9.51E-115 | 2.98E-114 |
| mmu-miR-871-5p   | 306   | 20   | 10.42   | 0.5    | -4.381283373 | Down | 4.73E-88  | 1.20E-87  |
| mmu-miR-770-3p   | 665   | 44   | 22.65   | 1.1    | -4.363935621 | Down | 6.60E-189 | 3.43E-188 |
| mmu-miR-3058-3p  | 393   | 26   | 13.38   | 0.65   | -4.363494588 | Down | 2.49E-112 | 7.73E-112 |
| mmu-miR-125b-5p  | 28523 | 1928 | 971.36  | 48.26  | -4.331106258 | Down | 0         | 0         |
| mmu-miR-182-3p   | 292   | 20   | 9.94    | 0.5    | -4.313245852 | Down | 3.20E-83  | 7.91E-83  |
| mmu-miR-486b-3p  | 41684 | 2859 | 1419.56 | 71.57  | -4.309945038 | Down | 0         | 0         |
| mmu-miR-92b-3p   | 13554 | 930  | 461.59  | 23.28  | -4.309449006 | Down | 0         | 0         |
| mmu-let-7c-2-3p  | 245   | 18   | 8.34    | 0.45   | -4.212050477 | Down | 6.11E-69  | 1.39E-68  |
| mmu-miR-130a-3p  | 6553  | 504  | 223.16  | 12.62  | -4.144294641 | Down | 0         | 0         |
| novel mir773     | 465   | 36   | 15.84   | 0.9    | -4.137503524 | Down | 9.84E-128 | 3.51E-127 |
| mmu-miR-467b-5p  | 377   | 29   | 12.84   | 0.73   | -4.136604928 | Down | 4.82E-104 | 1.39E-103 |
| mmu-miR-300-3p   | 247   | 19   | 8.41    | 0.48   | -4.13099949  | Down | 1.02E-68  | 2.31E-68  |
| mmu-miR-125a-5p  | 47302 | 3701 | 1610.88 | 92.65  | -4.11991424  | Down | 0         | 0         |
| mmu-miR-363-3p   | 562   | 45   | 19.14   | 1.13   | -4.082196152 | Down | 1.09E-152 | 4.63E-152 |

|                 |        |        |          |         |              |      |           |           |
|-----------------|--------|--------|----------|---------|--------------|------|-----------|-----------|
| mmu-miR-7075-3p | 338    | 27     | 11.51    | 0.68    | -4.081209277 | Down | 1.48E-92  | 3.96E-92  |
| mmu-miR-151-3p  | 38861  | 3158   | 1323.42  | 79.05   | -4.065361715 | Down | 0         | 0         |
| mmu-miR-8112    | 2833   | 234    | 96.48    | 5.86    | -4.041257337 | Down | 0         | 0         |
| mmu-miR-365-3p  | 2080   | 173    | 70.84    | 4.33    | -4.032125282 | Down | 0         | 0         |
| mmu-miR-450b-5p | 385    | 33     | 13.11    | 0.83    | -3.981412539 | Down | 3.08E-103 | 8.84E-103 |
| mmu-miR-181d-3p | 285    | 25     | 9.71     | 0.63    | -3.946047562 | Down | 2.34E-76  | 5.51E-76  |
| mmu-miR-770-5p  | 339    | 30     | 11.54    | 0.75    | -3.943608818 | Down | 2.70E-90  | 7.06E-90  |
| mmu-miR-1247-5p | 151    | 14     | 5.14     | 0.35    | -3.876341532 | Down | 1.52E-40  | 3.09E-40  |
| mmu-miR-7043-3p | 682    | 65     | 23.23    | 1.63    | -3.833045285 | Down | 4.64E-176 | 2.26E-175 |
| mmu-miR-433-3p  | 741    | 72     | 25.23    | 1.8     | -3.809071395 | Down | 5.18E-190 | 2.71E-189 |
| mmu-miR-186-5p  | 978    | 95     | 33.31    | 2.38    | -3.806921875 | Down | 3.23E-250 | 1.96E-249 |
| mmu-miR-193b-5p | 334    | 33     | 11.37    | 0.83    | -3.775977108 | Down | 3.76E-86  | 9.45E-86  |
| mmu-miR-485-5p  | 11334  | 1162   | 385.98   | 29.09   | -3.729930893 | Down | 0         | 0         |
| mmu-miR-130b-5p | 899    | 95     | 30.62    | 2.38    | -3.685440804 | Down | 4.71E-224 | 2.68E-223 |
| mmu-miR-434-3p  | 6211   | 663    | 211.52   | 16.6    | -3.671538935 | Down | 0         | 0         |
| mmu-miR-30e-5p  | 659    | 71     | 22.44    | 1.78    | -3.65612353  | Down | 1.13E-163 | 5.13E-163 |
| mmu-miR-101b-3p | 2311   | 253    | 78.7     | 6.33    | -3.636086231 | Down | 0         | 0         |
| mmu-miR-297c-5p | 728    | 80     | 24.79    | 2       | -3.631686366 | Down | 2.03E-179 | 1.01E-178 |
| novel mir84     | 300    | 33     | 10.22    | 0.83    | -3.62214005  | Down | 6.37E-75  | 1.49E-74  |
| mmu-let-7i-3p   | 3059   | 343    | 104.18   | 8.59    | -3.600276401 | Down | 0         | 0         |
| mmu-miR-382-5p  | 7802   | 877    | 265.7    | 21.95   | -3.597505383 | Down | 0         | 0         |
| mmu-miR-210-3p  | 1358   | 153    | 46.25    | 3.83    | -3.594037068 | Down | 0         | 0         |
| mmu-miR-27b-3p  | 301568 | 34155  | 10269.99 | 854.99  | -3.58638342  | Down | 0         | 0         |
| mmu-miR-183-5p  | 6526   | 745    | 222.24   | 18.65   | -3.574870969 | Down | 0         | 0         |
| mmu-miR-27a-3p  | 898139 | 102583 | 30586.4  | 2567.92 | -3.574218149 | Down | 0         | 0         |
| mmu-miR-139-3p  | 2866   | 341    | 97.6     | 8.54    | -3.514573173 | Down | 0         | 0         |
| mmu-miR-323-3p  | 376    | 45     | 12.8     | 1.13    | -3.501749132 | Down | 9.08E-91  | 2.39E-90  |
| novel mir50     | 6062   | 730    | 206.44   | 18.27   | -3.498173997 | Down | 0         | 0         |
| mmu-miR-19a-3p  | 322    | 40     | 10.97    | 1       | -3.455491621 | Down | 6.44E-77  | 1.53E-76  |
| mmu-miR-1306-3p | 2633   | 328    | 89.67    | 8.21    | -3.449171271 | Down | 0         | 0         |
| mmu-miR-196b-5p | 203113 | 25423  | 6917.07  | 636.4   | -3.442155316 | Down | 0         | 0         |
| mmu-miR-375-3p  | 107106 | 13760  | 3647.53  | 344.45  | -3.404553361 | Down | 0         | 0         |
| mmu-miR-6960-5p | 951    | 124    | 32.39    | 3.1     | -3.385208348 | Down | 1.39E-219 | 7.84E-219 |
| mmu-miR-466k    | 531    | 70     | 18.08    | 1.75    | -3.368967851 | Down | 6.93E-123 | 2.35E-122 |
| mmu-miR-224-5p  | 2979   | 398    | 101.45   | 9.96    | -3.348479313 | Down | 0         | 0         |
| mmu-miR-3087-3p | 328    | 44     | 11.17    | 1.1     | -3.344053757 | Down | 4.84E-76  | 1.14E-75  |

|                      |        |        |          |         |              |      |           |           |
|----------------------|--------|--------|----------|---------|--------------|------|-----------|-----------|
| mmu-miR-32-5p        | 976    | 132    | 33.24    | 3.3     | -3.332382453 | Down | 4.98E-222 | 2.81E-221 |
| mmu-miR-130b-3p      | 304    | 41     | 10.35    | 1.03    | -3.328914525 | Down | 1.89E-70  | 4.32E-70  |
| mmu-miR-369-5p       | 13132  | 1778   | 447.21   | 44.51   | -3.328751043 | Down | 0         | 0         |
| mmu-miR-17-5p        | 512    | 70     | 17.44    | 1.75    | -3.316973213 | Down | 7.81E-117 | 2.50E-116 |
| mmu-miR-361-5p       | 3892   | 532    | 132.54   | 13.32   | -3.314761837 | Down | 0         | 0         |
| mmu-miR-431-5p       | 1363   | 188    | 46.42    | 4.71    | -3.300947558 | Down | 8.00E-307 | 5.33E-306 |
| mmu-miR-3102-5p.2-5p | 470    | 66     | 16.01    | 1.65    | -3.278435378 | Down | 3.21E-106 | 9.42E-106 |
| mmu-miR-148a-3p      | 4641   | 666    | 158.05   | 16.67   | -3.245055026 | Down | 0         | 0         |
| mmu-miR-7a-2-3p      | 384    | 55     | 13.08    | 1.38    | -3.244622369 | Down | 2.19E-86  | 5.53E-86  |
| mmu-let-7a-1-3p      | 4541   | 659    | 154.65   | 16.5    | -3.228468904 | Down | 0         | 0         |
| mmu-miR-450b-3p      | 274    | 41     | 9.33     | 1.03    | -3.179232744 | Down | 5.63E-61  | 1.23E-60  |
| mmu-miR-10b-5p       | 56638  | 8555   | 1928.82  | 214.15  | -3.171024933 | Down | 0         | 0         |
| mmu-miR-19b-3p       | 17318  | 2642   | 589.77   | 66.14   | -3.156557488 | Down | 0         | 0         |
| mmu-miR-8116         | 5084   | 783    | 173.14   | 19.6    | -3.143013505 | Down | 0         | 0         |
| mmu-miR-379-5p       | 10898  | 1682   | 371.13   | 42.1    | -3.140032486 | Down | 0         | 0         |
| mmu-miR-487b-3p      | 977    | 151    | 33.27    | 3.78    | -3.137763727 | Down | 7.71E-210 | 4.27E-209 |
| mmu-miR-615-3p       | 894    | 139    | 30.45    | 3.48    | -3.129283017 | Down | 1.19E-191 | 6.32E-191 |
| mmu-miR-322-5p       | 10984  | 1711   | 374.06   | 42.83   | -3.126576118 | Down | 0         | 0         |
| novel mir107         | 859    | 134    | 29.25    | 3.35    | -3.126203624 | Down | 6.05E-184 | 3.08E-183 |
| mmu-miR-150-5p       | 141786 | 22235  | 4828.57  | 556.6   | -3.116883179 | Down | 0         | 0         |
| novel mir168         | 7485   | 1197   | 254.9    | 29.96   | -3.088821844 | Down | 0         | 0         |
| mmu-miR-10a-5p       | 172002 | 27598  | 5857.58  | 690.85  | -3.083860347 | Down | 0         | 0         |
| mmu-miR-410-3p       | 2887   | 473    | 98.32    | 11.84   | -3.053815835 | Down | 0         | 0         |
| mmu-miR-196a-5p      | 1985   | 328    | 67.6     | 8.21    | -3.041569119 | Down | 0         | 0         |
| novel mir8           | 204    | 34     | 6.95     | 0.85    | -3.031478231 | Down | 1.21E-43  | 2.48E-43  |
| mmu-let-7c-5p        | 693066 | 116097 | 23602.57 | 2906.21 | -3.021733098 | Down | 0         | 0         |
| mmu-miR-193b-3p      | 5550   | 949    | 189.01   | 23.76   | -2.991855824 | Down | 0         | 0         |
| mmu-let-7a-5p        | 212506 | 36409  | 7236.96  | 911.41  | -2.989211693 | Down | 0         | 0         |
| mmu-miR-7a-1-3p      | 5153   | 889    | 175.49   | 22.25   | -2.979511582 | Down | 0         | 0         |
| mmu-miR-18a-3p       | 1002   | 173    | 34.12    | 4.33    | -2.978178717 | Down | 4.73E-204 | 2.60E-203 |
| mmu-miR-18a-5p       | 2295   | 397    | 78.16    | 9.94    | -2.97511271  | Down | 0         | 0         |
| mmu-miR-30c-5p       | 4172   | 755    | 142.08   | 18.9    | -2.910245347 | Down | 0         | 0         |
| mmu-let-7f-5p        | 150494 | 27422  | 5125.12  | 686.44  | -2.900380256 | Down | 0         | 0         |
| mmu-let-7b-5p        | 450255 | 82319  | 15333.57 | 2060.66 | -2.895515237 | Down | 0         | 0         |
| mmu-miR-215-3p       | 1648   | 302    | 56.12    | 7.56    | -2.892056869 | Down | 0         | 0         |
| mmu-miR-301a-3p      | 606    | 112    | 20.64    | 2.8     | -2.881944238 | Down | 7.03E-120 | 2.32E-119 |

|                   |        |        |          |         |              |      |           |           |
|-------------------|--------|--------|----------|---------|--------------|------|-----------|-----------|
| mmu-miR-466i-5p   | 3069   | 568    | 104.52   | 14.22   | -2.87778566  | Down | 0         | 0         |
| mmu-let-7k        | 497155 | 92808  | 16930.76 | 2323.22 | -2.865449052 | Down | 0         | 0         |
| mmu-miR-24-2-5p   | 2114   | 398    | 71.99    | 9.96    | -2.853578871 | Down | 0         | 0         |
| mmu-miR-6899-3p   | 197    | 37     | 6.71     | 0.93    | -2.851010145 | Down | 8.87E-40  | 1.80E-39  |
| mmu-miR-6936-5p   | 300    | 57     | 10.22    | 1.43    | -2.837308144 | Down | 2.35E-59  | 5.08E-59  |
| mmu-miR-342-3p    | 14666  | 2798   | 499.46   | 70.04   | -2.834118153 | Down | 0         | 0         |
| mmu-miR-222-3p    | 42054  | 8090   | 1432.16  | 202.51  | -2.822127623 | Down | 0         | 0         |
| mmu-miR-215-5p    | 9705   | 1879   | 330.51   | 47.04   | -2.812733958 | Down | 0         | 0         |
| mmu-miR-125a-3p   | 191    | 37     | 6.5      | 0.93    | -2.805137097 | Down | 5.45E-38  | 1.10E-37  |
| mmu-miR-28a-5p    | 235    | 47     | 8        | 1.18    | -2.76121314  | Down | 1.44E-45  | 2.98E-45  |
| mmu-miR-30d-5p    | 59416  | 12082  | 2023.43  | 302.44  | -2.742082076 | Down | 0         | 0         |
| mmu-miR-1191a     | 2116   | 432    | 72.06    | 10.81   | -2.736832129 | Down | 0         | 0         |
| mmu-miR-5126      | 1718   | 358    | 58.51    | 8.96    | -2.707112581 | Down | 0         | 0         |
| mmu-miR-30a-5p    | 2990   | 628    | 101.83   | 15.72   | -2.695489532 | Down | 0         | 0         |
| mmu-miR-96-5p     | 733    | 154    | 24.96    | 3.86    | -2.692945182 | Down | 1.52E-134 | 5.74E-134 |
| mmu-miR-1843b-5p  | 691    | 147    | 23.53    | 3.68    | -2.676723649 | Down | 5.38E-126 | 1.88E-125 |
| mmu-miR-341-3p    | 7007   | 1495   | 238.63   | 37.42   | -2.672893963 | Down | 0         | 0         |
| mmu-miR-467e-5p   | 173    | 37     | 5.89     | 0.93    | -2.662965013 | Down | 1.05E-32  | 2.06E-32  |
| mmu-miR-15b-5p    | 7680   | 1650   | 261.54   | 41.3    | -2.662817923 | Down | 0         | 0         |
| mmu-miR-182-5p    | 496    | 109    | 16.89    | 2.73    | -2.629196472 | Down | 3.54E-89  | 9.15E-89  |
| mmu-miR-543-5p    | 585    | 129    | 19.92    | 3.23    | -2.624611577 | Down | 1.25E-104 | 3.64E-104 |
| mmu-miR-339-3p    | 1973   | 437    | 67.19    | 10.94   | -2.618633792 | Down | 0         | 0         |
| mmu-let-7d-5p     | 88588  | 19755  | 3016.89  | 494.52  | -2.60896132  | Down | 0         | 0         |
| mmu-miR-1934-5p   | 453    | 101    | 15.43    | 2.53    | -2.608528772 | Down | 7.14E-81  | 1.73E-80  |
| mmu-miR-151-5p    | 15744  | 3523   | 536.17   | 88.19   | -2.604003519 | Down | 0         | 0         |
| mmu-miR-8107      | 484    | 109    | 16.48    | 2.73    | -2.593743386 | Down | 9.62E-86  | 2.41E-85  |
| novel mir339      | 979    | 223    | 33.34    | 5.58    | -2.578917077 | Down | 2.74E-170 | 1.28E-169 |
| mmu-miR-667-3p    | 473    | 108    | 16.11    | 2.7     | -2.576925182 | Down | 4.18E-83  | 1.03E-82  |
| mmu-miR-328-3p    | 615598 | 140738 | 20964.38 | 3523.04 | -2.573047404 | Down | 0         | 0         |
| mmu-miR-222-5p    | 1087   | 253    | 37.02    | 6.33    | -2.54802749  | Down | 3.20E-186 | 1.64E-185 |
| mmu-miR-219a-1-3p | 655    | 157    | 22.31    | 3.93    | -2.505089296 | Down | 8.65E-111 | 2.64E-110 |
| mmu-let-7g-5p     | 583994 | 142493 | 19888.09 | 3566.97 | -2.479133743 | Down | 0         | 0         |
| mmu-miR-149-5p    | 15203  | 3742   | 517.74   | 93.67   | -2.466568813 | Down | 0         | 0         |
| mmu-miR-326-3p    | 7949   | 1977   | 270.71   | 49.49   | -2.451539234 | Down | 0         | 0         |
| mmu-miR-34c-3p    | 285    | 71     | 9.71     | 1.78    | -2.447594054 | Down | 6.11E-48  | 1.28E-47  |
| mmu-miR-30e-3p    | 1726   | 431    | 58.78    | 10.79   | -2.445630494 | Down | 1.09E-280 | 6.98E-280 |

|                   |         |        |          |         |              |      |           |           |
|-------------------|---------|--------|----------|---------|--------------|------|-----------|-----------|
| novel mir3        | 504     | 126    | 17.16    | 3.15    | -2.445625819 | Down | 3.04E-83  | 7.52E-83  |
| mmu-miR-106b-3p   | 1160    | 291    | 39.5     | 7.28    | -2.439842298 | Down | 1.08E-188 | 5.60E-188 |
| mmu-miR-22-3p     | 649510  | 166068 | 22119.26 | 4157.11 | -2.411650293 | Down | 0         | 0         |
| novel mir722      | 445     | 114    | 15.15    | 2.85    | -2.410283969 | Down | 1.87E-72  | 4.31E-72  |
| mmu-miR-128-1-5p  | 54      | 14     | 1.84     | 0.35    | -2.394278939 | Down | 5.15E-10  | 8.87E-10  |
| mmu-miR-330-3p    | 768     | 199    | 26.15    | 4.98    | -2.392593299 | Down | 1.04E-122 | 3.52E-122 |
| mmu-miR-1198-3p   | 391     | 102    | 13.32    | 2.55    | -2.38502493  | Down | 4.70E-63  | 1.03E-62  |
| mmu-miR-98-5p     | 20797   | 5421   | 708.25   | 135.7   | -2.383837976 | Down | 0         | 0         |
| mmu-let-7e-3p     | 2271    | 609    | 77.34    | 15.24   | -2.343351862 | Down | 0         | 0         |
| mmu-miR-540-3p    | 525     | 141    | 17.88    | 3.53    | -2.340606648 | Down | 2.82E-82  | 6.90E-82  |
| mmu-miR-92a-3p    | 1542701 | 417999 | 52537.15 | 10463.6 | -2.327958644 | Down | 0         | 0         |
| mmu-miR-218-5p    | 2785    | 767    | 94.84    | 19.2    | -2.304389352 | Down | 0         | 0         |
| mmu-miR-23b-3p    | 3461    | 965    | 117.87   | 24.16   | -2.286504214 | Down | 0         | 0         |
| mmu-miR-1843a-5p  | 3545    | 992    | 120.73   | 24.83   | -2.281628047 | Down | 0         | 0         |
| mmu-miR-99b-5p    | 22541   | 6370   | 767.64   | 159.46  | -2.267235315 | Down | 0         | 0         |
| mmu-miR-154-5p    | 6444    | 1848   | 219.45   | 46.26   | -2.246055099 | Down | 0         | 0         |
| mmu-miR-30b-5p    | 5056    | 1460   | 172.18   | 36.55   | -2.235974261 | Down | 0         | 0         |
| mmu-miR-103-3p    | 467     | 136    | 15.9     | 3.4     | -2.225420114 | Down | 6.26E-69  | 1.42E-68  |
| mmu-miR-374b-5p   | 960     | 287    | 32.69    | 7.18    | -2.186793628 | Down | 9.43E-137 | 3.62E-136 |
| mmu-miR-26a-5p    | 32901   | 9948   | 1120.45  | 249.02  | -2.169744748 | Down | 0         | 0         |
| mmu-miR-125b-1-3p | 376     | 114    | 12.8     | 2.85    | -2.167109986 | Down | 4.92E-54  | 1.04E-53  |
| mmu-miR-450a-5p   | 2033    | 637    | 69.23    | 15.95   | -2.117840924 | Down | 6.11E-276 | 3.86E-275 |
| novel mir91       | 38      | 12     | 1.29     | 0.3     | -2.10433666  | Down | 1.54E-06  | 2.45E-06  |
| mmu-miR-192-5p    | 59308   | 18846  | 2019.75  | 471.76  | -2.098051726 | Down | 0         | 0         |
| mmu-miR-26b-5p    | 12288   | 3907   | 418.47   | 97.8    | -2.09721783  | Down | 0         | 0         |
| mmu-miR-139-5p    | 81212   | 26032  | 2765.7   | 651.65  | -2.085475465 | Down | 0         | 0         |
| mmu-miR-181c-5p   | 10624   | 3453   | 361.8    | 86.44   | -2.065421431 | Down | 0         | 0         |
| mmu-miR-3084-3p   | 313     | 102    | 10.66    | 2.55    | -2.063638286 | Down | 1.50E-42  | 3.07E-42  |
| mmu-miR-423-3p    | 96384   | 31418  | 3282.39  | 786.47  | -2.061283024 | Down | 0         | 0         |
| mmu-miR-122-5p    | 219616  | 72330  | 7479.09  | 1810.61 | -2.046386917 | Down | 0         | 0         |
| mmu-miR-191-3p    | 1938    | 645    | 66       | 16.15   | -2.03093186  | Down | 4.73E-249 | 2.86E-248 |
| mmu-miR-223-3p    | 43758   | 14731  | 1490.19  | 368.76  | -2.014742209 | Down | 0         | 0         |
| mmu-miR-486a-3p   | 10018   | 3389   | 341.17   | 84.84   | -2.007674266 | Down | 0         | 0         |
| mmu-miR-15b-3p    | 3374    | 1172   | 114.9    | 29.34   | -1.969438022 | Down | 0         | 0         |
| mmu-miR-6395      | 32      | 11     | 1.09     | 0.28    | -1.960829403 | Down | 2.28E-05  | 3.42E-05  |
| mmu-miR-191-5p    | 701318  | 245090 | 23883.6  | 6135.24 | -1.960828626 | Down | 0         | 0         |

|                   |        |        |         |         |              |      |           |           |
|-------------------|--------|--------|---------|---------|--------------|------|-----------|-----------|
| mmu-miR-212-3p    | 1429   | 501    | 48.67   | 12.54   | -1.956495426 | Down | 3.69E-175 | 1.79E-174 |
| mmu-miR-27a-5p    | 262    | 93     | 8.92    | 2.33    | -1.936713755 | Down | 3.61E-33  | 7.10E-33  |
| mmu-miR-598-3p    | 213    | 76     | 7.25    | 1.9     | -1.931981577 | Down | 3.92E-27  | 7.57E-27  |
| novel mir498      | 95     | 34     | 3.24    | 0.85    | -1.930459067 | Down | 6.74E-13  | 1.19E-12  |
| mmu-miR-409-3p    | 4007   | 1457   | 136.46  | 36.47   | -1.903696017 | Down | 0         | 0         |
| mmu-miR-15a-5p    | 3532   | 1292   | 120.28  | 32.34   | -1.895005189 | Down | 0         | 0         |
| mmu-miR-340-5p    | 622    | 231    | 21.18   | 5.78    | -1.873561191 | Down | 5.95E-73  | 1.38E-72  |
| mmu-miR-93-5p     | 68728  | 25759  | 2340.55 | 644.81  | -1.859901562 | Down | 0         | 0         |
| mmu-miR-3074-2-3p | 1162   | 436    | 39.57   | 10.91   | -1.858755964 | Down | 3.37E-133 | 1.26E-132 |
| mmu-miR-345-5p    | 206    | 79     | 7.02    | 1.98    | -1.8259706   | Down | 1.78E-24  | 3.38E-24  |
| mmu-miR-411-5p    | 2483   | 964    | 84.56   | 24.13   | -1.809147461 | Down | 5.49E-272 | 3.41E-271 |
| mmu-miR-421-3p    | 493    | 192    | 16.79   | 4.81    | -1.803493431 | Down | 2.47E-55  | 5.30E-55  |
| mmu-miR-7662-3p   | 56     | 22     | 1.91    | 0.55    | -1.796069115 | Down | 1.61E-07  | 2.64E-07  |
| mmu-miR-381-3p    | 222    | 88     | 7.56    | 2.2     | -1.780882711 | Down | 2.36E-25  | 4.50E-25  |
| mmu-miR-194-5p    | 11756  | 4723   | 400.35  | 118.23  | -1.759665651 | Down | 0         | 0         |
| mmu-miR-338-5p    | 418    | 168    | 14.24   | 4.21    | -1.758057008 | Down | 1.43E-45  | 2.97E-45  |
| mmu-miR-466g      | 345    | 140    | 11.75   | 3.5     | -1.747233393 | Down | 1.67E-37  | 3.34E-37  |
| mmu-miR-297a-5p   | 1216   | 501    | 41.41   | 12.54   | -1.723441855 | Down | 2.03E-125 | 7.08E-125 |
| mmu-miR-574-5p    | 8937   | 3719   | 304.35  | 93.1    | -1.708878293 | Down | 0         | 0         |
| novel mir39       | 196    | 82     | 6.67    | 2.05    | -1.702062852 | Down | 2.84E-21  | 5.29E-21  |
| mmu-miR-296-5p    | 352    | 152    | 11.99   | 3.8     | -1.657760335 | Down | 1.47E-35  | 2.92E-35  |
| mmu-miR-6988-3p   | 227    | 98     | 7.73    | 2.45    | -1.657686665 | Down | 1.62E-23  | 3.07E-23  |
| mmu-miR-503-3p    | 1431   | 621    | 48.73   | 15.55   | -1.647895642 | Down | 3.35E-138 | 1.29E-137 |
| mmu-miR-29c-3p    | 1699   | 748    | 57.86   | 18.72   | -1.627985888 | Down | 9.73E-161 | 4.35E-160 |
| mmu-miR-1198-5p   | 252063 | 111234 | 8584.08 | 2784.48 | -1.624255591 | Down | 0         | 0         |
| mmu-miR-669b-5p   | 2447   | 1089   | 83.33   | 27.26   | -1.612050418 | Down | 2.11E-227 | 1.22E-226 |
| mmu-miR-128-3p    | 90942  | 40809  | 3097.06 | 1021.56 | -1.600125392 | Down | 0         | 0         |
| mmu-miR-17-3p     | 404    | 187    | 13.76   | 4.68    | -1.555900035 | Down | 3.75E-37  | 7.49E-37  |
| mmu-miR-140-5p    | 3461   | 1644   | 117.87  | 41.15   | -1.518232238 | Down | 1.58E-293 | 1.03E-292 |
| mmu-miR-132-5p    | 642    | 308    | 21.86   | 7.71    | -1.503490636 | Down | 3.04E-55  | 6.50E-55  |
| mmu-miR-22-5p     | 1438   | 714    | 48.97   | 17.87   | -1.454358562 | Down | 1.61E-115 | 5.11E-115 |
| mmu-miR-425-3p    | 14377  | 7187   | 489.61  | 179.91  | -1.444357646 | Down | 0         | 0         |
| mmu-miR-100-5p    | 10567  | 5309   | 359.86  | 132.9   | -1.437094645 | Down | 0         | 0         |
| mmu-miR-190b-5p   | 522    | 269    | 17.78   | 6.73    | -1.401576914 | Down | 8.75E-41  | 1.78E-40  |
| mmu-miR-150-3p    | 907    | 475    | 30.89   | 11.89   | -1.377391156 | Down | 7.93E-68  | 1.78E-67  |
| mmu-miR-877-5p    | 2487   | 1312   | 84.7    | 32.84   | -1.366907842 | Down | 1.72E-180 | 8.57E-180 |

|                 |         |        |          |          |              |      |           |           |
|-----------------|---------|--------|----------|----------|--------------|------|-----------|-----------|
| mmu-miR-223-5p  | 3003    | 1587   | 102.27   | 39.73    | -1.364082307 | Down | 6.86E-217 | 3.84E-216 |
| mmu-miR-203-3p  | 1240    | 660    | 42.23    | 16.52    | -1.35405456  | Down | 1.11E-89  | 2.88E-89  |
| mmu-miR-30a-3p  | 7899    | 4216   | 269      | 105.54   | -1.349816284 | Down | 0         | 0         |
| novel mir579    | 223     | 120    | 7.59     | 3        | -1.339137385 | Down | 3.31E-17  | 6.01E-17  |
| mmu-miR-872-3p  | 5362    | 2993   | 182.6    | 74.92    | -1.285263961 | Down | 0         | 0         |
| mmu-miR-23a-3p  | 590879  | 333546 | 20122.56 | 8349.52  | -1.26904869  | Down | 0         | 0         |
| mmu-miR-187-3p  | 1259    | 724    | 42.88    | 18.12    | -1.24272195  | Down | 9.53E-80  | 2.31E-79  |
| mmu-miR-1a-3p   | 3691    | 2129   | 125.7    | 53.29    | -1.238047912 | Down | 1.05E-228 | 6.11E-228 |
| mmu-miR-29a-5p  | 357     | 206    | 12.16    | 5.16     | -1.236700258 | Down | 1.06E-23  | 2.00E-23  |
| mmu-miR-126a-3p | 16986   | 10088  | 578.46   | 252.53   | -1.195762415 | Down | 0         | 0         |
| mmu-miR-28a-3p  | 6689    | 4138   | 227.8    | 103.58   | -1.137022283 | Down | 0         | 0         |
| mmu-miR-21a-5p  | 199248  | 125910 | 6785.45  | 3151.85  | -1.106245619 | Down | 0         | 0         |
| mmu-let-7i-5p   | 632649  | 415207 | 21545.05 | 10393.71 | -1.051645735 | Down | 0         | 0         |
| mmu-miR-451a    | 1416703 | 935689 | 48246.25 | 23422.72 | -1.042508191 | Down | 0         | 0         |
| mmu-miR-669o-5p | 176     | 119    | 5.99     | 2.98     | -1.007243672 | Down | 2.44E-09  | 4.13E-09  |
