# Supplementary material for: Pathogenic Effects and Potential Regulatory Mechanisms of Tea Polyphenols on Obesity
Source: Hindawi journal article supplement (doi:10.1155/2019/2579734), 2019-06-11
Supplement: f3 [file 2579734.f3.pdf]

| miRNA id       | Count (DUI4) | Count (DA3) | TPM (DUI4) | TPM (DA3) | log2 Ratio (DA3/DUI4) | Up-Down-Regulation (DA3/DUI4) | P-value   | FDR       |
|----------------|--------------|-------------|------------|-----------|-----------------------|-------------------------------|-----------|-----------|
| novel_pir2296  | 0            | 5189        | 0.001      | 257.3     | 17.97309193           | Up                            | 0         | 0         |
| novel_pir2295  | 0            | 3061        | 0.001      | 151.78    | 17.21162217           | Up                            | 0         | 0         |
| novel_pir1968  | 0            | 337         | 0.001      | 16.71     | 14.02842411           | Up                            | 2.53E-132 | 8.01E-131 |
| novel_pir373   | 0            | 296         | 0.001      | 14.68     | 13.84156435           | Up                            | 2.52E-116 | 6.78E-115 |
| novel_pir1535  | 0            | 260         | 0.001      | 12.89     | 13.65396464           | Up                            | 2.82E-102 | 5.14E-101 |
| novel_pir1634  | 0            | 257         | 0.001      | 12.74     | 13.63707766           | Up                            | 4.18E-101 | 7.34E-100 |
| novel_pir2444  | 0            | 242         | 0.001      | 12        | 13.55074679           | Up                            | 2.98E-95  | 4.27E-94  |
| novel_pir1636  | 0            | 234         | 0.001      | 11.6      | 13.50183718           | Up                            | 3.95E-92  | 5.02E-91  |
| novel_pir1633  | 0            | 231         | 0.001      | 11.45     | 13.48305998           | Up                            | 5.85E-91  | 7.16E-90  |
| novel_pir1632  | 0            | 227         | 0.001      | 11.26     | 13.45891921           | Up                            | 2.13E-89  | 2.41E-88  |
| novel_pir86    | 0            | 221         | 0.001      | 10.96     | 13.41996018           | Up                            | 4.67E-87  | 4.68E-86  |
| mmu_piR_000802 | 0            | 215         | 0.001      | 10.66     | 13.37991982           | Up                            | 1.03E-84  | 9.44E-84  |
| novel_pir1635  | 0            | 210         | 0.001      | 10.41     | 13.34568245           | Up                            | 9.17E-83  | 7.77E-82  |
| novel_pir245   | 0            | 208         | 0.001      | 10.31     | 13.33175671           | Up                            | 5.53E-82  | 4.51E-81  |
| novel_pir222   | 0            | 206         | 0.001      | 10.21     | 13.31769525           | Up                            | 3.34E-81  | 2.64E-80  |
| novel_pir411   | 0            | 203         | 0.001      | 10.07     | 13.29777606           | Up                            | 4.94E-80  | 3.73E-79  |
| mmu_piR_002435 | 0            | 193         | 0.001      | 9.57      | 13.22430321           | Up                            | 3.95E-76  | 2.49E-75  |
| novel_pir1040  | 0            | 192         | 0.001      | 9.52      | 13.21674586           | Up                            | 9.69E-76  | 6.08E-75  |
| novel_pir2198  | 0            | 179         | 0.001      | 8.88      | 13.11634396           | Up                            | 1.15E-70  | 6.27E-70  |
| mmu_piR_001529 | 0            | 175         | 0.001      | 8.68      | 13.08347933           | Up                            | 4.17E-69  | 2.18E-68  |
| novel_pir555   | 0            | 162         | 0.001      | 8.03      | 12.97118427           | Up                            | 4.93E-64  | 2.20E-63  |
| novel_pir2427  | 0            | 159         | 0.001      | 7.88      | 12.94397991           | Up                            | 7.31E-63  | 3.14E-62  |
| novel_pir1285  | 0            | 150         | 0.001      | 7.44      | 12.86108691           | Up                            | 2.38E-59  | 9.37E-59  |
| novel_pir427   | 0            | 147         | 0.001      | 7.29      | 12.8317031            | Up                            | 3.52E-58  | 1.36E-57  |
| novel_pir342   | 0            | 143         | 0.001      | 7.09      | 12.79156991           | Up                            | 1.28E-56  | 4.72E-56  |
| novel_pir435   | 0            | 138         | 0.001      | 6.84      | 12.73978061           | Up                            | 1.15E-54  | 4.03E-54  |
| novel_pir1411  | 0            | 136         | 0.001      | 6.74      | 12.71853288           | Up                            | 6.91E-54  | 2.40E-53  |
| novel_pir1375  | 0            | 134         | 0.001      | 6.64      | 12.69696753           | Up                            | 4.17E-53  | 1.42E-52  |
| novel_pir1941  | 0            | 133         | 0.001      | 6.59      | 12.68606275           | Up                            | 1.02E-52  | 3.46E-52  |
| novel_pir2062  | 0            | 132         | 0.001      | 6.55      | 12.67727919           | Up                            | 2.51E-52  | 8.34E-52  |
| novel_pir2387  | 0            | 132         | 0.001      | 6.55      | 12.67727919           | Up                            | 2.51E-52  | 8.33E-52  |
| novel_pir2012  | 0            | 130         | 0.001      | 6.45      | 12.65508345           | Up                            | 1.52E-51  | 4.96E-51  |
| novel_pir2336  | 0            | 128         | 0.001      | 6.35      | 12.63254088           | Up                            | 9.14E-51  | 2.92E-50  |

|                |   |     |       |      |             |    |          |          |
|----------------|---|-----|-------|------|-------------|----|----------|----------|
| novel_pirl398  | 0 | 128 | 0.001 | 6.35 | 12.63254088 | Up | 9.14E-51 | 2.92E-50 |
| novel_pirl679  | 0 | 126 | 0.001 | 6.25 | 12.60964047 | Up | 5.52E-50 | 1.72E-49 |
| novel_pir328   | 0 | 126 | 0.001 | 6.25 | 12.60964047 | Up | 5.52E-50 | 1.72E-49 |
| novel_pirl264  | 0 | 125 | 0.001 | 6.2  | 12.5980525  | Up | 1.35E-49 | 4.17E-49 |
| novel_pir2005  | 0 | 124 | 0.001 | 6.15 | 12.5863707  | Up | 3.33E-49 | 1.02E-48 |
| novel_pirl510  | 0 | 124 | 0.001 | 6.15 | 12.5863707  | Up | 3.33E-49 | 1.01E-48 |
| novel_pir2396  | 0 | 117 | 0.001 | 5.8  | 12.50183718 | Up | 1.79E-46 | 5.28E-46 |
| novel_pir975   | 0 | 115 | 0.001 | 5.7  | 12.4767462  | Up | 1.08E-45 | 3.14E-45 |
| novel_pirl565  | 0 | 115 | 0.001 | 5.7  | 12.4767462  | Up | 1.08E-45 | 3.13E-45 |
| novel_pirl626  | 0 | 114 | 0.001 | 5.65 | 12.46403515 | Up | 2.66E-45 | 7.64E-45 |
| novel_pirl008  | 0 | 113 | 0.001 | 5.6  | 12.45121111 | Up | 6.53E-45 | 1.86E-44 |
| novel_pirl876  | 0 | 112 | 0.001 | 5.55 | 12.43827206 | Up | 1.60E-44 | 4.55E-44 |
| novel_pirl595  | 0 | 110 | 0.001 | 5.45 | 12.41204051 | Up | 9.67E-44 | 2.70E-43 |
| novel_pir2435  | 0 | 108 | 0.001 | 5.36 | 12.38801729 | Up | 5.83E-43 | 1.60E-42 |
| novel_pirl162  | 0 | 107 | 0.001 | 5.31 | 12.37449615 | Up | 1.43E-42 | 3.91E-42 |
| novel_pir343   | 0 | 104 | 0.001 | 5.16 | 12.33315535 | Up | 2.12E-41 | 5.70E-41 |
| novel_pir59    | 0 | 102 | 0.001 | 5.06 | 12.30492167 | Up | 1.28E-40 | 3.38E-40 |
| novel_pirl045  | 0 | 102 | 0.001 | 5.06 | 12.30492167 | Up | 1.28E-40 | 3.38E-40 |
| novel_pir295   | 0 | 102 | 0.001 | 5.06 | 12.30492167 | Up | 1.28E-40 | 3.37E-40 |
| novel_pirl850  | 0 | 99  | 0.001 | 4.91 | 12.26150731 | Up | 1.90E-39 | 4.89E-39 |
| novel_pir2129  | 0 | 98  | 0.001 | 4.86 | 12.2467406  | Up | 4.66E-39 | 1.19E-38 |
| novel_pir852   | 0 | 96  | 0.001 | 4.76 | 12.21674586 | Up | 2.81E-38 | 7.14E-38 |
| mmu_piR_038994 | 0 | 93  | 0.001 | 4.61 | 12.17055104 | Up | 4.16E-37 | 1.04E-36 |
| novel_pirl331  | 0 | 93  | 0.001 | 4.61 | 12.17055104 | Up | 4.16E-37 | 1.04E-36 |
| novel_pirl316  | 0 | 93  | 0.001 | 4.61 | 12.17055104 | Up | 4.16E-37 | 1.04E-36 |
| novel_pirl252  | 0 | 92  | 0.001 | 4.56 | 12.15481811 | Up | 1.02E-36 | 2.55E-36 |
| novel_pir648   | 0 | 89  | 0.001 | 4.41 | 12.10656294 | Up | 1.51E-35 | 3.72E-35 |
| novel_pirl113  | 0 | 89  | 0.001 | 4.41 | 12.10656294 | Up | 1.51E-35 | 3.71E-35 |
| novel_pirl73   | 0 | 88  | 0.001 | 4.36 | 12.09011242 | Up | 3.72E-35 | 9.07E-35 |
| novel_pirl96   | 0 | 88  | 0.001 | 4.36 | 12.09011242 | Up | 3.72E-35 | 9.06E-35 |
| novel_pir816   | 0 | 85  | 0.001 | 4.21 | 12.03960452 | Up | 5.51E-34 | 1.32E-33 |
| novel_pir845   | 0 | 85  | 0.001 | 4.21 | 12.03960452 | Up | 5.51E-34 | 1.32E-33 |
| novel_pirl477  | 0 | 85  | 0.001 | 4.21 | 12.03960452 | Up | 5.51E-34 | 1.32E-33 |
| novel_pir2367  | 0 | 85  | 0.001 | 4.21 | 12.03960452 | Up | 5.51E-34 | 1.32E-33 |
| novel_pirl363  | 0 | 85  | 0.001 | 4.21 | 12.03960452 | Up | 5.51E-34 | 1.31E-33 |
| novel_pirl597  | 0 | 84  | 0.001 | 4.17 | 12.02583167 | Up | 1.35E-33 | 3.22E-33 |

|                |   |    |       |      |             |    |          |          |
|----------------|---|----|-------|------|-------------|----|----------|----------|
| novel_pir90    | 0 | 84 | 0.001 | 4.17 | 12.02583167 | Up | 1.35E-33 | 3.22E-33 |
| novel_pir1540  | 0 | 83 | 0.001 | 4.12 | 12.00842862 | Up | 3.32E-33 | 7.84E-33 |
| mmu_piR_038351 | 0 | 83 | 0.001 | 4.12 | 12.00842862 | Up | 3.32E-33 | 7.83E-33 |
| novel_pir235   | 0 | 81 | 0.001 | 4.02 | 11.97297979 | Up | 2.00E-32 | 4.64E-32 |
| novel_pir519   | 0 | 81 | 0.001 | 4.02 | 11.97297979 | Up | 2.00E-32 | 4.64E-32 |
| novel_pir951   | 0 | 80 | 0.001 | 3.97 | 11.95492329 | Up | 4.92E-32 | 1.14E-31 |
| novel_pir1817  | 0 | 80 | 0.001 | 3.97 | 11.95492329 | Up | 4.92E-32 | 1.14E-31 |
| novel_pir2391  | 0 | 79 | 0.001 | 3.92 | 11.93663794 | Up | 1.21E-31 | 2.76E-31 |
| novel_pir1137  | 0 | 79 | 0.001 | 3.92 | 11.93663794 | Up | 1.21E-31 | 2.76E-31 |
| novel_pir1084  | 0 | 78 | 0.001 | 3.87 | 11.91811785 | Up | 2.97E-31 | 6.73E-31 |
| novel_pir143   | 0 | 77 | 0.001 | 3.82 | 11.89935692 | Up | 7.29E-31 | 1.65E-30 |
| novel_pir2207  | 0 | 76 | 0.001 | 3.77 | 11.88034881 | Up | 1.79E-30 | 4.01E-30 |
| novel_pir632   | 0 | 75 | 0.001 | 3.72 | 11.86108691 | Up | 4.40E-30 | 9.77E-30 |
| novel_pir199   | 0 | 75 | 0.001 | 3.72 | 11.86108691 | Up | 4.40E-30 | 9.76E-30 |
| novel_pir1522  | 0 | 74 | 0.001 | 3.67 | 11.84156435 | Up | 1.08E-29 | 2.39E-29 |
| novel_pir84    | 0 | 74 | 0.001 | 3.67 | 11.84156435 | Up | 1.08E-29 | 2.39E-29 |
| novel_pir2179  | 0 | 74 | 0.001 | 3.67 | 11.84156435 | Up | 1.08E-29 | 2.38E-29 |
| novel_pir473   | 0 | 74 | 0.001 | 3.67 | 11.84156435 | Up | 1.08E-29 | 2.38E-29 |
| novel_pir887   | 0 | 73 | 0.001 | 3.62 | 11.82177398 | Up | 2.65E-29 | 5.83E-29 |
| novel_pir1694  | 0 | 73 | 0.001 | 3.62 | 11.82177398 | Up | 2.65E-29 | 5.82E-29 |
| novel_pir676   | 0 | 72 | 0.001 | 3.57 | 11.80170836 | Up | 6.52E-29 | 1.42E-28 |
| novel_pir1587  | 0 | 72 | 0.001 | 3.57 | 11.80170836 | Up | 6.52E-29 | 1.42E-28 |
| novel_pir33    | 0 | 72 | 0.001 | 3.57 | 11.80170836 | Up | 6.52E-29 | 1.42E-28 |
| novel_pir486   | 0 | 70 | 0.001 | 3.47 | 11.76071995 | Up | 3.93E-28 | 8.46E-28 |
| novel_pir2096  | 0 | 70 | 0.001 | 3.47 | 11.76071995 | Up | 3.93E-28 | 8.45E-28 |
| novel_pir1737  | 0 | 70 | 0.001 | 3.47 | 11.76071995 | Up | 3.93E-28 | 8.44E-28 |
| novel_pir253   | 0 | 69 | 0.001 | 3.42 | 11.73978061 | Up | 9.66E-28 | 2.06E-27 |
| novel_pir539   | 0 | 69 | 0.001 | 3.42 | 11.73978061 | Up | 9.66E-28 | 2.06E-27 |
| novel_pir402   | 0 | 69 | 0.001 | 3.42 | 11.73978061 | Up | 9.66E-28 | 2.06E-27 |
| novel_pir2364  | 0 | 68 | 0.001 | 3.37 | 11.71853288 | Up | 2.37E-27 | 5.01E-27 |
| novel_pir1351  | 0 | 68 | 0.001 | 3.37 | 11.71853288 | Up | 2.37E-27 | 5.00E-27 |
| novel_pir755   | 0 | 67 | 0.001 | 3.32 | 11.69696753 | Up | 5.82E-27 | 1.22E-26 |
| novel_pir1638  | 0 | 66 | 0.001 | 3.27 | 11.67507492 | Up | 1.43E-26 | 2.99E-26 |
| novel_pir2031  | 0 | 65 | 0.001 | 3.22 | 11.65284497 | Up | 3.51E-26 | 7.29E-26 |
| mmu_piR_024234 | 0 | 64 | 0.001 | 3.17 | 11.63026713 | Up | 8.63E-26 | 1.78E-25 |
| novel_pir1223  | 0 | 64 | 0.001 | 3.17 | 11.63026713 | Up | 8.63E-26 | 1.78E-25 |

|               |   |    |       |      |             |    |          |          |
|---------------|---|----|-------|------|-------------|----|----------|----------|
| novel_pirl433 | 0 | 63 | 0.001 | 3.12 | 11.60733031 | Up | 2.12E-25 | 4.35E-25 |
| novel_pir824  | 0 | 63 | 0.001 | 3.12 | 11.60733031 | Up | 2.12E-25 | 4.34E-25 |
| novel_pirl327 | 0 | 63 | 0.001 | 3.12 | 11.60733031 | Up | 2.12E-25 | 4.34E-25 |
| novel_pirl495 | 0 | 63 | 0.001 | 3.12 | 11.60733031 | Up | 2.12E-25 | 4.33E-25 |
| novel_pir319  | 0 | 63 | 0.001 | 3.12 | 11.60733031 | Up | 2.12E-25 | 4.33E-25 |
| novel_pir2448 | 0 | 63 | 0.001 | 3.12 | 11.60733031 | Up | 2.12E-25 | 4.32E-25 |
| novel_pir431  | 0 | 63 | 0.001 | 3.12 | 11.60733031 | Up | 2.12E-25 | 4.32E-25 |
| novel_pirl907 | 0 | 61 | 0.001 | 3.02 | 11.56033283 | Up | 1.28E-24 | 2.59E-24 |
| novel_pirl726 | 0 | 61 | 0.001 | 3.02 | 11.56033283 | Up | 1.28E-24 | 2.59E-24 |
| novel_pir2199 | 0 | 61 | 0.001 | 3.02 | 11.56033283 | Up | 1.28E-24 | 2.58E-24 |
| novel_pir2327 | 0 | 60 | 0.001 | 2.98 | 11.54109662 | Up | 3.14E-24 | 6.31E-24 |
| novel_pirl394 | 0 | 59 | 0.001 | 2.93 | 11.51668495 | Up | 7.71E-24 | 1.55E-23 |
| novel_pirl157 | 0 | 59 | 0.001 | 2.93 | 11.51668495 | Up | 7.71E-24 | 1.54E-23 |
| novel_pirl772 | 0 | 59 | 0.001 | 2.93 | 11.51668495 | Up | 7.71E-24 | 1.54E-23 |
| novel_pir2076 | 0 | 59 | 0.001 | 2.93 | 11.51668495 | Up | 7.71E-24 | 1.54E-23 |
| novel_pir772  | 0 | 58 | 0.001 | 2.88 | 11.4918531  | Up | 1.89E-23 | 3.76E-23 |
| novel_pirl987 | 0 | 57 | 0.001 | 2.83 | 11.46658634 | Up | 4.65E-23 | 9.21E-23 |
| novel_pir89   | 0 | 57 | 0.001 | 2.83 | 11.46658634 | Up | 4.65E-23 | 9.20E-23 |
| novel_pirl290 | 0 | 57 | 0.001 | 2.83 | 11.46658634 | Up | 4.65E-23 | 9.19E-23 |
| novel_pirl451 | 0 | 56 | 0.001 | 2.78 | 11.44086917 | Up | 1.14E-22 | 2.25E-22 |
| novel_pirl955 | 0 | 56 | 0.001 | 2.78 | 11.44086917 | Up | 1.14E-22 | 2.24E-22 |
| novel_pirl407 | 0 | 56 | 0.001 | 2.78 | 11.44086917 | Up | 1.14E-22 | 2.24E-22 |
| novel_pir2277 | 0 | 55 | 0.001 | 2.73 | 11.41468524 | Up | 2.81E-22 | 5.50E-22 |
| novel_pir487  | 0 | 55 | 0.001 | 2.73 | 11.41468524 | Up | 2.81E-22 | 5.49E-22 |
| novel_pirl181 | 0 | 54 | 0.001 | 2.68 | 11.38801729 | Up | 6.89E-22 | 1.34E-21 |
| novel_pir2201 | 0 | 54 | 0.001 | 2.68 | 11.38801729 | Up | 6.89E-22 | 1.34E-21 |
| novel_pirl307 | 0 | 54 | 0.001 | 2.68 | 11.38801729 | Up | 6.89E-22 | 1.34E-21 |
| novel_pirl568 | 0 | 54 | 0.001 | 2.68 | 11.38801729 | Up | 6.89E-22 | 1.34E-21 |
| novel_pirl052 | 0 | 54 | 0.001 | 2.68 | 11.38801729 | Up | 6.89E-22 | 1.34E-21 |
| novel_pirl497 | 0 | 53 | 0.001 | 2.63 | 11.36084708 | Up | 1.69E-21 | 3.26E-21 |
| novel_pir740  | 0 | 53 | 0.001 | 2.63 | 11.36084708 | Up | 1.69E-21 | 3.26E-21 |
| novel_pirl748 | 0 | 53 | 0.001 | 2.63 | 11.36084708 | Up | 1.69E-21 | 3.25E-21 |
| novel_pir358  | 0 | 53 | 0.001 | 2.63 | 11.36084708 | Up | 1.69E-21 | 3.25E-21 |
| novel_pirl567 | 0 | 52 | 0.001 | 2.58 | 11.33315535 | Up | 4.16E-21 | 7.97E-21 |
| novel_pirl924 | 0 | 52 | 0.001 | 2.58 | 11.33315535 | Up | 4.16E-21 | 7.96E-21 |
| novel_pir2100 | 0 | 51 | 0.001 | 2.53 | 11.30492167 | Up | 1.02E-20 | 1.95E-20 |

|               |   |    |       |      |             |    |          |          |
|---------------|---|----|-------|------|-------------|----|----------|----------|
| novel_pirl983 | 0 | 50 | 0.001 | 2.48 | 11.27612441 | Up | 2.51E-20 | 4.74E-20 |
| novel_pirl435 | 0 | 50 | 0.001 | 2.48 | 11.27612441 | Up | 2.51E-20 | 4.74E-20 |
| novel_pirl503 | 0 | 50 | 0.001 | 2.48 | 11.27612441 | Up | 2.51E-20 | 4.74E-20 |
| novel_pirl973 | 0 | 49 | 0.001 | 2.43 | 11.2467406  | Up | 6.16E-20 | 1.16E-19 |
| novel_pir265  | 0 | 49 | 0.001 | 2.43 | 11.2467406  | Up | 6.16E-20 | 1.16E-19 |
| novel_pir2461 | 0 | 47 | 0.001 | 2.33 | 11.18611424 | Up | 3.71E-19 | 6.91E-19 |
| novel_pirl246 | 0 | 47 | 0.001 | 2.33 | 11.18611424 | Up | 3.71E-19 | 6.91E-19 |
| novel_pirl851 | 0 | 46 | 0.001 | 2.28 | 11.15481811 | Up | 9.12E-19 | 1.69E-18 |
| novel_pir4    | 0 | 46 | 0.001 | 2.28 | 11.15481811 | Up | 9.12E-19 | 1.69E-18 |
| novel_pir457  | 0 | 46 | 0.001 | 2.28 | 11.15481811 | Up | 9.12E-19 | 1.69E-18 |
| novel_pir2027 | 0 | 46 | 0.001 | 2.28 | 11.15481811 | Up | 9.12E-19 | 1.69E-18 |
| novel_pir2046 | 0 | 46 | 0.001 | 2.28 | 11.15481811 | Up | 9.12E-19 | 1.69E-18 |
| novel_pirl9   | 0 | 46 | 0.001 | 2.28 | 11.15481811 | Up | 9.12E-19 | 1.69E-18 |
| novel_pir60   | 0 | 45 | 0.001 | 2.23 | 11.12282799 | Up | 2.24E-18 | 4.13E-18 |
| novel_pirl485 | 0 | 45 | 0.001 | 2.23 | 11.12282799 | Up | 2.24E-18 | 4.12E-18 |
| novel_pirl616 | 0 | 45 | 0.001 | 2.23 | 11.12282799 | Up | 2.24E-18 | 4.12E-18 |
| novel_pir662  | 0 | 44 | 0.001 | 2.18 | 11.09011242 | Up | 5.50E-18 | 1.00E-17 |
| novel_pir2392 | 0 | 44 | 0.001 | 2.18 | 11.09011242 | Up | 5.50E-18 | 1.00E-17 |
| novel_pir2067 | 0 | 44 | 0.001 | 2.18 | 11.09011242 | Up | 5.50E-18 | 1.00E-17 |
| novel_pir2369 | 0 | 44 | 0.001 | 2.18 | 11.09011242 | Up | 5.50E-18 | 1.00E-17 |
| novel_pirl436 | 0 | 43 | 0.001 | 2.13 | 11.05663772 | Up | 1.35E-17 | 2.45E-17 |
| novel_pir2044 | 0 | 43 | 0.001 | 2.13 | 11.05663772 | Up | 1.35E-17 | 2.45E-17 |
| novel_pir671  | 0 | 42 | 0.001 | 2.08 | 11.02236781 | Up | 3.32E-17 | 5.98E-17 |
| novel_pir264  | 0 | 42 | 0.001 | 2.08 | 11.02236781 | Up | 3.32E-17 | 5.98E-17 |
| novel_pirl85  | 0 | 42 | 0.001 | 2.08 | 11.02236781 | Up | 3.32E-17 | 5.97E-17 |
| novel_pirl763 | 0 | 42 | 0.001 | 2.08 | 11.02236781 | Up | 3.32E-17 | 5.97E-17 |
| novel_pir87   | 0 | 42 | 0.001 | 2.08 | 11.02236781 | Up | 3.32E-17 | 5.96E-17 |
| novel_pirl546 | 0 | 41 | 0.001 | 2.03 | 10.98726401 | Up | 8.15E-17 | 1.46E-16 |
| novel_pirl025 | 0 | 41 | 0.001 | 2.03 | 10.98726401 | Up | 8.15E-17 | 1.46E-16 |
| novel_pirl469 | 0 | 41 | 0.001 | 2.03 | 10.98726401 | Up | 8.15E-17 | 1.46E-16 |
| novel_pirl997 | 0 | 40 | 0.001 | 1.98 | 10.95128471 | Up | 2.00E-16 | 3.55E-16 |
| novel_pirl7   | 0 | 40 | 0.001 | 1.98 | 10.95128471 | Up | 2.00E-16 | 3.55E-16 |
| novel_pirl461 | 0 | 40 | 0.001 | 1.98 | 10.95128471 | Up | 2.00E-16 | 3.55E-16 |
| novel_pir421  | 0 | 40 | 0.001 | 1.98 | 10.95128471 | Up | 2.00E-16 | 3.54E-16 |
| novel_pirl864 | 0 | 39 | 0.001 | 1.93 | 10.91438513 | Up | 4.92E-16 | 8.65E-16 |
| novel_pir550  | 0 | 39 | 0.001 | 1.93 | 10.91438513 | Up | 4.92E-16 | 8.64E-16 |

|               |   |    |       |      |             |    |          |          |
|---------------|---|----|-------|------|-------------|----|----------|----------|
| novel_pirl856 | 0 | 39 | 0.001 | 1.93 | 10.91438513 | Up | 4.92E-16 | 8.63E-16 |
| novel_pir752  | 0 | 39 | 0.001 | 1.93 | 10.91438513 | Up | 4.92E-16 | 8.62E-16 |
| novel_pirl65  | 0 | 38 | 0.001 | 1.88 | 10.87651695 | Up | 1.21E-15 | 2.11E-15 |
| novel_pir537  | 0 | 38 | 0.001 | 1.88 | 10.87651695 | Up | 1.21E-15 | 2.11E-15 |
| novel_pir2452 | 0 | 38 | 0.001 | 1.88 | 10.87651695 | Up | 1.21E-15 | 2.11E-15 |
| novel_pirl771 | 0 | 38 | 0.001 | 1.88 | 10.87651695 | Up | 1.21E-15 | 2.11E-15 |
| novel_pir2053 | 0 | 38 | 0.001 | 1.88 | 10.87651695 | Up | 1.21E-15 | 2.10E-15 |
| novel_pir520  | 0 | 38 | 0.001 | 1.88 | 10.87651695 | Up | 1.21E-15 | 2.10E-15 |
| novel_pirl704 | 0 | 38 | 0.001 | 1.88 | 10.87651695 | Up | 1.21E-15 | 2.10E-15 |
| novel_pirl646 | 0 | 38 | 0.001 | 1.88 | 10.87651695 | Up | 1.21E-15 | 2.10E-15 |
| novel_pir616  | 0 | 38 | 0.001 | 1.88 | 10.87651695 | Up | 1.21E-15 | 2.10E-15 |
| novel_pir2462 | 0 | 38 | 0.001 | 1.88 | 10.87651695 | Up | 1.21E-15 | 2.09E-15 |
| novel_pirl18  | 0 | 38 | 0.001 | 1.88 | 10.87651695 | Up | 1.21E-15 | 2.09E-15 |
| novel_pir991  | 0 | 37 | 0.001 | 1.83 | 10.83762793 | Up | 2.97E-15 | 5.12E-15 |
| novel_pir512  | 0 | 37 | 0.001 | 1.83 | 10.83762793 | Up | 2.97E-15 | 5.11E-15 |
| novel_pirl77  | 0 | 37 | 0.001 | 1.83 | 10.83762793 | Up | 2.97E-15 | 5.11E-15 |
| novel_pirl559 | 0 | 37 | 0.001 | 1.83 | 10.83762793 | Up | 2.97E-15 | 5.10E-15 |
| novel_pir685  | 0 | 37 | 0.001 | 1.83 | 10.83762793 | Up | 2.97E-15 | 5.10E-15 |
| novel_pirl265 | 0 | 37 | 0.001 | 1.83 | 10.83762793 | Up | 2.97E-15 | 5.09E-15 |
| novel_pirl166 | 0 | 36 | 0.001 | 1.79 | 10.80574387 | Up | 7.29E-15 | 1.24E-14 |
| novel_pir2450 | 0 | 36 | 0.001 | 1.79 | 10.80574387 | Up | 7.29E-15 | 1.24E-14 |
| novel_pirl456 | 0 | 36 | 0.001 | 1.79 | 10.80574387 | Up | 7.29E-15 | 1.24E-14 |
| novel_pirl532 | 0 | 35 | 0.001 | 1.74 | 10.76487159 | Up | 1.79E-14 | 3.04E-14 |
| novel_pir2349 | 0 | 35 | 0.001 | 1.74 | 10.76487159 | Up | 1.79E-14 | 3.04E-14 |
| novel_pirl747 | 0 | 35 | 0.001 | 1.74 | 10.76487159 | Up | 1.79E-14 | 3.04E-14 |
| novel_pir2058 | 0 | 35 | 0.001 | 1.74 | 10.76487159 | Up | 1.79E-14 | 3.04E-14 |
| novel_pirl474 | 0 | 35 | 0.001 | 1.74 | 10.76487159 | Up | 1.79E-14 | 3.03E-14 |
| novel_pirl733 | 0 | 35 | 0.001 | 1.74 | 10.76487159 | Up | 1.79E-14 | 3.03E-14 |
| novel_pir212  | 0 | 35 | 0.001 | 1.74 | 10.76487159 | Up | 1.79E-14 | 3.03E-14 |
| novel_pirl895 | 0 | 35 | 0.001 | 1.74 | 10.76487159 | Up | 1.79E-14 | 3.02E-14 |
| novel_pirl885 | 0 | 34 | 0.001 | 1.69 | 10.72280753 | Up | 4.39E-14 | 7.40E-14 |
| novel_pirl478 | 0 | 34 | 0.001 | 1.69 | 10.72280753 | Up | 4.39E-14 | 7.39E-14 |
| novel_pir2047 | 0 | 34 | 0.001 | 1.69 | 10.72280753 | Up | 4.39E-14 | 7.38E-14 |
| novel_pirl665 | 0 | 34 | 0.001 | 1.69 | 10.72280753 | Up | 4.39E-14 | 7.38E-14 |
| novel_pir888  | 0 | 34 | 0.001 | 1.69 | 10.72280753 | Up | 4.39E-14 | 7.37E-14 |
| novel_pirl195 | 0 | 34 | 0.001 | 1.69 | 10.72280753 | Up | 4.39E-14 | 7.36E-14 |

|                |   |    |       |      |             |    |          |          |
|----------------|---|----|-------|------|-------------|----|----------|----------|
| novel_pir376   | 0 | 34 | 0.001 | 1.69 | 10.72280753 | Up | 4.39E-14 | 7.36E-14 |
| novel_pir834   | 0 | 34 | 0.001 | 1.69 | 10.72280753 | Up | 4.39E-14 | 7.35E-14 |
| novel_pir197   | 0 | 34 | 0.001 | 1.69 | 10.72280753 | Up | 4.39E-14 | 7.34E-14 |
| novel_pir1111  | 0 | 34 | 0.001 | 1.69 | 10.72280753 | Up | 4.39E-14 | 7.34E-14 |
| novel_pir898   | 0 | 34 | 0.001 | 1.69 | 10.72280753 | Up | 4.39E-14 | 7.33E-14 |
| novel_pir276   | 0 | 34 | 0.001 | 1.69 | 10.72280753 | Up | 4.39E-14 | 7.33E-14 |
| novel_pir1370  | 0 | 33 | 0.001 | 1.64 | 10.6794801  | Up | 1.08E-13 | 1.79E-13 |
| mmu_piR_038258 | 0 | 33 | 0.001 | 1.64 | 10.6794801  | Up | 1.08E-13 | 1.79E-13 |
| novel_pir154   | 0 | 33 | 0.001 | 1.64 | 10.6794801  | Up | 1.08E-13 | 1.78E-13 |
| novel_pir345   | 0 | 33 | 0.001 | 1.64 | 10.6794801  | Up | 1.08E-13 | 1.78E-13 |
| novel_pir768   | 0 | 33 | 0.001 | 1.64 | 10.6794801  | Up | 1.08E-13 | 1.78E-13 |
| novel_pir388   | 0 | 33 | 0.001 | 1.64 | 10.6794801  | Up | 1.08E-13 | 1.78E-13 |
| novel_pir445   | 0 | 32 | 0.001 | 1.59 | 10.63481105 | Up | 2.65E-13 | 4.34E-13 |
| novel_pir2303  | 0 | 32 | 0.001 | 1.59 | 10.63481105 | Up | 2.65E-13 | 4.34E-13 |
| novel_pir1682  | 0 | 32 | 0.001 | 1.59 | 10.63481105 | Up | 2.65E-13 | 4.34E-13 |
| novel_pir2451  | 0 | 32 | 0.001 | 1.59 | 10.63481105 | Up | 2.65E-13 | 4.33E-13 |
| novel_pir2088  | 0 | 32 | 0.001 | 1.59 | 10.63481105 | Up | 2.65E-13 | 4.33E-13 |
| novel_pir2338  | 0 | 32 | 0.001 | 1.59 | 10.63481105 | Up | 2.65E-13 | 4.33E-13 |
| novel_pir1541  | 0 | 32 | 0.001 | 1.59 | 10.63481105 | Up | 2.65E-13 | 4.32E-13 |
| novel_pir1015  | 0 | 31 | 0.001 | 1.54 | 10.58871464 | Up | 6.51E-13 | 1.05E-12 |
| novel_pir2121  | 0 | 31 | 0.001 | 1.54 | 10.58871464 | Up | 6.51E-13 | 1.05E-12 |
| novel_pir1016  | 0 | 31 | 0.001 | 1.54 | 10.58871464 | Up | 6.51E-13 | 1.05E-12 |
| novel_pir2376  | 0 | 31 | 0.001 | 1.54 | 10.58871464 | Up | 6.51E-13 | 1.05E-12 |
| novel_pir2036  | 0 | 31 | 0.001 | 1.54 | 10.58871464 | Up | 6.51E-13 | 1.05E-12 |
| novel_pir1693  | 0 | 31 | 0.001 | 1.54 | 10.58871464 | Up | 6.51E-13 | 1.05E-12 |
| novel_pir1337  | 0 | 31 | 0.001 | 1.54 | 10.58871464 | Up | 6.51E-13 | 1.05E-12 |
| novel_pir1957  | 0 | 31 | 0.001 | 1.54 | 10.58871464 | Up | 6.51E-13 | 1.05E-12 |
| novel_pir921   | 0 | 30 | 0.001 | 1.49 | 10.54109662 | Up | 1.60E-12 | 2.57E-12 |
| novel_pir1596  | 0 | 30 | 0.001 | 1.49 | 10.54109662 | Up | 1.60E-12 | 2.56E-12 |
| novel_pir725   | 0 | 30 | 0.001 | 1.49 | 10.54109662 | Up | 1.60E-12 | 2.56E-12 |
| novel_pir28    | 0 | 30 | 0.001 | 1.49 | 10.54109662 | Up | 1.60E-12 | 2.56E-12 |
| novel_pir695   | 0 | 29 | 0.001 | 1.44 | 10.4918531  | Up | 3.93E-12 | 6.24E-12 |
| novel_pir2356  | 0 | 29 | 0.001 | 1.44 | 10.4918531  | Up | 3.93E-12 | 6.23E-12 |
| novel_pir2446  | 0 | 29 | 0.001 | 1.44 | 10.4918531  | Up | 3.93E-12 | 6.23E-12 |
| novel_pir2235  | 0 | 29 | 0.001 | 1.44 | 10.4918531  | Up | 3.93E-12 | 6.22E-12 |
| novel_pir1438  | 0 | 29 | 0.001 | 1.44 | 10.4918531  | Up | 3.93E-12 | 6.22E-12 |

|               |   |    |       |      |             |    |          |          |
|---------------|---|----|-------|------|-------------|----|----------|----------|
| novel_pir1058 | 0 | 29 | 0.001 | 1.44 | 10.4918531  | Up | 3.93E-12 | 6.21E-12 |
| novel_pir524  | 0 | 29 | 0.001 | 1.44 | 10.4918531  | Up | 3.93E-12 | 6.21E-12 |
| novel_pir192  | 0 | 29 | 0.001 | 1.44 | 10.4918531  | Up | 3.93E-12 | 6.20E-12 |
| novel_pir446  | 0 | 29 | 0.001 | 1.44 | 10.4918531  | Up | 3.93E-12 | 6.20E-12 |
| novel_pir703  | 0 | 29 | 0.001 | 1.44 | 10.4918531  | Up | 3.93E-12 | 6.19E-12 |
| novel_pir665  | 0 | 29 | 0.001 | 1.44 | 10.4918531  | Up | 3.93E-12 | 6.19E-12 |
| novel_pir2041 | 0 | 29 | 0.001 | 1.44 | 10.4918531  | Up | 3.93E-12 | 6.18E-12 |
| novel_pir1383 | 0 | 28 | 0.001 | 1.39 | 10.44086917 | Up | 9.65E-12 | 1.51E-11 |
| novel_pir741  | 0 | 28 | 0.001 | 1.39 | 10.44086917 | Up | 9.65E-12 | 1.51E-11 |
| novel_pir1434 | 0 | 28 | 0.001 | 1.39 | 10.44086917 | Up | 9.65E-12 | 1.51E-11 |
| novel_pir1653 | 0 | 28 | 0.001 | 1.39 | 10.44086917 | Up | 9.65E-12 | 1.51E-11 |
| novel_pir1282 | 0 | 28 | 0.001 | 1.39 | 10.44086917 | Up | 9.65E-12 | 1.51E-11 |
| novel_pir2000 | 0 | 28 | 0.001 | 1.39 | 10.44086917 | Up | 9.65E-12 | 1.50E-11 |
| novel_pir598  | 0 | 28 | 0.001 | 1.39 | 10.44086917 | Up | 9.65E-12 | 1.50E-11 |
| novel_pir1205 | 0 | 28 | 0.001 | 1.39 | 10.44086917 | Up | 9.65E-12 | 1.50E-11 |
| novel_pir1827 | 0 | 28 | 0.001 | 1.39 | 10.44086917 | Up | 9.65E-12 | 1.50E-11 |
| novel_pir32   | 0 | 28 | 0.001 | 1.39 | 10.44086917 | Up | 9.65E-12 | 1.50E-11 |
| novel_pir2004 | 0 | 28 | 0.001 | 1.39 | 10.44086917 | Up | 9.65E-12 | 1.50E-11 |
| novel_pir982  | 0 | 28 | 0.001 | 1.39 | 10.44086917 | Up | 9.65E-12 | 1.50E-11 |
| novel_pir1301 | 0 | 28 | 0.001 | 1.39 | 10.44086917 | Up | 9.65E-12 | 1.50E-11 |
| novel_pir215  | 0 | 27 | 0.001 | 1.34 | 10.38801729 | Up | 2.37E-11 | 3.66E-11 |
| novel_pir1902 | 0 | 27 | 0.001 | 1.34 | 10.38801729 | Up | 2.37E-11 | 3.66E-11 |
| novel_pir91   | 0 | 27 | 0.001 | 1.34 | 10.38801729 | Up | 2.37E-11 | 3.66E-11 |
| novel_pir1364 | 0 | 27 | 0.001 | 1.34 | 10.38801729 | Up | 2.37E-11 | 3.66E-11 |
| novel_pir291  | 0 | 27 | 0.001 | 1.34 | 10.38801729 | Up | 2.37E-11 | 3.65E-11 |
| novel_pir2092 | 0 | 27 | 0.001 | 1.34 | 10.38801729 | Up | 2.37E-11 | 3.65E-11 |
| novel_pir220  | 0 | 27 | 0.001 | 1.34 | 10.38801729 | Up | 2.37E-11 | 3.65E-11 |
| novel_pir1077 | 0 | 26 | 0.001 | 1.29 | 10.33315535 | Up | 5.82E-11 | 8.90E-11 |
| novel_pir1594 | 0 | 26 | 0.001 | 1.29 | 10.33315535 | Up | 5.82E-11 | 8.89E-11 |
| novel_pir15   | 0 | 26 | 0.001 | 1.29 | 10.33315535 | Up | 5.82E-11 | 8.89E-11 |
| novel_pir708  | 0 | 26 | 0.001 | 1.29 | 10.33315535 | Up | 5.82E-11 | 8.88E-11 |
| novel_pir1538 | 0 | 26 | 0.001 | 1.29 | 10.33315535 | Up | 5.82E-11 | 8.87E-11 |
| novel_pir490  | 0 | 26 | 0.001 | 1.29 | 10.33315535 | Up | 5.82E-11 | 8.86E-11 |
| novel_pir1818 | 0 | 26 | 0.001 | 1.29 | 10.33315535 | Up | 5.82E-11 | 8.86E-11 |
| novel_pir1878 | 0 | 26 | 0.001 | 1.29 | 10.33315535 | Up | 5.82E-11 | 8.85E-11 |
| novel_pir1896 | 0 | 26 | 0.001 | 1.29 | 10.33315535 | Up | 5.82E-11 | 8.84E-11 |



|               |   |    |       |      |             |    |          |          |
|---------------|---|----|-------|------|-------------|----|----------|----------|
| novel_pir1545 | 0 | 26 | 0.001 | 1.29 | 10.33315535 | Up | 5.82E-11 | 8.84E-11 |
| novel_pir793  | 0 | 26 | 0.001 | 1.29 | 10.33315535 | Up | 5.82E-11 | 8.83E-11 |
| novel_pir85   | 0 | 26 | 0.001 | 1.29 | 10.33315535 | Up | 5.82E-11 | 8.82E-11 |
| novel_pir523  | 0 | 26 | 0.001 | 1.29 | 10.33315535 | Up | 5.82E-11 | 8.82E-11 |
| novel_pir24   | 0 | 26 | 0.001 | 1.29 | 10.33315535 | Up | 5.82E-11 | 8.81E-11 |
| novel_pir2250 | 0 | 25 | 0.001 | 1.24 | 10.27612441 | Up | 1.43E-10 | 2.15E-10 |
| novel_pir2200 | 0 | 25 | 0.001 | 1.24 | 10.27612441 | Up | 1.43E-10 | 2.14E-10 |
| novel_pir588  | 0 | 25 | 0.001 | 1.24 | 10.27612441 | Up | 1.43E-10 | 2.14E-10 |
| novel_pir1623 | 0 | 25 | 0.001 | 1.24 | 10.27612441 | Up | 1.43E-10 | 2.14E-10 |
| novel_pir890  | 0 | 25 | 0.001 | 1.24 | 10.27612441 | Up | 1.43E-10 | 2.14E-10 |
| novel_pir2281 | 0 | 25 | 0.001 | 1.24 | 10.27612441 | Up | 1.43E-10 | 2.14E-10 |
| novel_pir1807 | 0 | 25 | 0.001 | 1.24 | 10.27612441 | Up | 1.43E-10 | 2.14E-10 |
| novel_pir1062 | 0 | 25 | 0.001 | 1.24 | 10.27612441 | Up | 1.43E-10 | 2.13E-10 |
| novel_pir2293 | 0 | 25 | 0.001 | 1.24 | 10.27612441 | Up | 1.43E-10 | 2.13E-10 |
| novel_pir437  | 0 | 25 | 0.001 | 1.24 | 10.27612441 | Up | 1.43E-10 | 2.13E-10 |
| novel_pir494  | 0 | 25 | 0.001 | 1.24 | 10.27612441 | Up | 1.43E-10 | 2.13E-10 |
| novel_pir517  | 0 | 25 | 0.001 | 1.24 | 10.27612441 | Up | 1.43E-10 | 2.13E-10 |
| novel_pir1030 | 0 | 25 | 0.001 | 1.24 | 10.27612441 | Up | 1.43E-10 | 2.13E-10 |
| novel_pir1964 | 0 | 25 | 0.001 | 1.24 | 10.27612441 | Up | 1.43E-10 | 2.12E-10 |
| novel_pir854  | 0 | 25 | 0.001 | 1.24 | 10.27612441 | Up | 1.43E-10 | 2.12E-10 |
| novel_pir1945 | 0 | 24 | 0.001 | 1.19 | 10.21674586 | Up | 3.51E-10 | 5.17E-10 |
| novel_pir819  | 0 | 24 | 0.001 | 1.19 | 10.21674586 | Up | 3.51E-10 | 5.16E-10 |
| novel_pir1586 | 0 | 24 | 0.001 | 1.19 | 10.21674586 | Up | 3.51E-10 | 5.16E-10 |
| novel_pir2287 | 0 | 24 | 0.001 | 1.19 | 10.21674586 | Up | 3.51E-10 | 5.16E-10 |
| novel_pir2318 | 0 | 24 | 0.001 | 1.19 | 10.21674586 | Up | 3.51E-10 | 5.15E-10 |
| novel_pir730  | 0 | 24 | 0.001 | 1.19 | 10.21674586 | Up | 3.51E-10 | 5.15E-10 |
| novel_pir2014 | 0 | 24 | 0.001 | 1.19 | 10.21674586 | Up | 3.51E-10 | 5.14E-10 |
| novel_pir839  | 0 | 24 | 0.001 | 1.19 | 10.21674586 | Up | 3.51E-10 | 5.14E-10 |
| novel_pir2006 | 0 | 24 | 0.001 | 1.19 | 10.21674586 | Up | 3.51E-10 | 5.14E-10 |
| novel_pir18   | 0 | 24 | 0.001 | 1.19 | 10.21674586 | Up | 3.51E-10 | 5.13E-10 |
| novel_pir75   | 0 | 24 | 0.001 | 1.19 | 10.21674586 | Up | 3.51E-10 | 5.13E-10 |
| novel_pir601  | 0 | 24 | 0.001 | 1.19 | 10.21674586 | Up | 3.51E-10 | 5.12E-10 |
| novel_pir193  | 0 | 24 | 0.001 | 1.19 | 10.21674586 | Up | 3.51E-10 | 5.12E-10 |
| novel_pir1024 | 0 | 24 | 0.001 | 1.19 | 10.21674586 | Up | 3.51E-10 | 5.12E-10 |
| novel_pir674  | 0 | 24 | 0.001 | 1.19 | 10.21674586 | Up | 3.51E-10 | 5.11E-10 |
| novel_pir686  | 0 | 24 | 0.001 | 1.19 | 10.21674586 | Up | 3.51E-10 | 5.11E-10 |

|                |   |    |       |      |             |    |          |          |
|----------------|---|----|-------|------|-------------|----|----------|----------|
| novel_pir1759  | 0 | 24 | 0.001 | 1.19 | 10.21674586 | Up | 3.51E-10 | 5.11E-10 |
| novel_pir2068  | 0 | 23 | 0.001 | 1.14 | 10.15481811 | Up | 8.62E-10 | 1.25E-09 |
| novel_pir1828  | 0 | 23 | 0.001 | 1.14 | 10.15481811 | Up | 8.62E-10 | 1.25E-09 |
| novel_pir2380  | 0 | 23 | 0.001 | 1.14 | 10.15481811 | Up | 8.62E-10 | 1.25E-09 |
| novel_pir1731  | 0 | 23 | 0.001 | 1.14 | 10.15481811 | Up | 8.62E-10 | 1.25E-09 |
| novel_pir569   | 0 | 23 | 0.001 | 1.14 | 10.15481811 | Up | 8.62E-10 | 1.24E-09 |
| novel_pir1792  | 0 | 23 | 0.001 | 1.14 | 10.15481811 | Up | 8.62E-10 | 1.24E-09 |
| novel_pir2022  | 0 | 23 | 0.001 | 1.14 | 10.15481811 | Up | 8.62E-10 | 1.24E-09 |
| novel_pir159   | 0 | 23 | 0.001 | 1.14 | 10.15481811 | Up | 8.62E-10 | 1.24E-09 |
| novel_pir1893  | 0 | 23 | 0.001 | 1.14 | 10.15481811 | Up | 8.62E-10 | 1.24E-09 |
| novel_pir2382  | 0 | 23 | 0.001 | 1.14 | 10.15481811 | Up | 8.62E-10 | 1.24E-09 |
| novel_pir468   | 0 | 23 | 0.001 | 1.14 | 10.15481811 | Up | 8.62E-10 | 1.24E-09 |
| novel_pir474   | 0 | 23 | 0.001 | 1.14 | 10.15481811 | Up | 8.62E-10 | 1.24E-09 |
| novel_pir2421  | 0 | 23 | 0.001 | 1.14 | 10.15481811 | Up | 8.62E-10 | 1.24E-09 |
| novel_pir233   | 0 | 23 | 0.001 | 1.14 | 10.15481811 | Up | 8.62E-10 | 1.24E-09 |
| novel_pir659   | 0 | 22 | 0.001 | 1.09 | 10.09011242 | Up | 2.12E-09 | 3.01E-09 |
| novel_pir1492  | 0 | 22 | 0.001 | 1.09 | 10.09011242 | Up | 2.12E-09 | 3.01E-09 |
| novel_pir353   | 0 | 22 | 0.001 | 1.09 | 10.09011242 | Up | 2.12E-09 | 3.01E-09 |
| novel_pir1107  | 0 | 22 | 0.001 | 1.09 | 10.09011242 | Up | 2.12E-09 | 3.01E-09 |
| novel_pir2278  | 0 | 22 | 0.001 | 1.09 | 10.09011242 | Up | 2.12E-09 | 3.00E-09 |
| novel_pir428   | 0 | 22 | 0.001 | 1.09 | 10.09011242 | Up | 2.12E-09 | 3.00E-09 |
| novel_pir1284  | 0 | 22 | 0.001 | 1.09 | 10.09011242 | Up | 2.12E-09 | 3.00E-09 |
| novel_pir2135  | 0 | 22 | 0.001 | 1.09 | 10.09011242 | Up | 2.12E-09 | 3.00E-09 |
| novel_pir1766  | 0 | 22 | 0.001 | 1.09 | 10.09011242 | Up | 2.12E-09 | 2.99E-09 |
| novel_pir217   | 0 | 22 | 0.001 | 1.09 | 10.09011242 | Up | 2.12E-09 | 2.99E-09 |
| novel_pir1314  | 0 | 22 | 0.001 | 1.09 | 10.09011242 | Up | 2.12E-09 | 2.99E-09 |
| mmu_piR_027027 | 0 | 21 | 0.001 | 1.04 | 10.02236781 | Up | 5.20E-09 | 7.32E-09 |
| novel_pir1926  | 0 | 21 | 0.001 | 1.04 | 10.02236781 | Up | 5.20E-09 | 7.31E-09 |
| mmu_piR_018376 | 0 | 21 | 0.001 | 1.04 | 10.02236781 | Up | 5.20E-09 | 7.31E-09 |
| novel_pir2247  | 0 | 21 | 0.001 | 1.04 | 10.02236781 | Up | 5.20E-09 | 7.30E-09 |
| novel_pir792   | 0 | 21 | 0.001 | 1.04 | 10.02236781 | Up | 5.20E-09 | 7.29E-09 |
| novel_pir1354  | 0 | 21 | 0.001 | 1.04 | 10.02236781 | Up | 5.20E-09 | 7.29E-09 |
| mmu_piR_022918 | 0 | 21 | 0.001 | 1.04 | 10.02236781 | Up | 5.20E-09 | 7.28E-09 |
| novel_pir1199  | 0 | 21 | 0.001 | 1.04 | 10.02236781 | Up | 5.20E-09 | 7.28E-09 |
| novel_pir202   | 0 | 21 | 0.001 | 1.04 | 10.02236781 | Up | 5.20E-09 | 7.27E-09 |
| novel_pir463   | 0 | 21 | 0.001 | 1.04 | 10.02236781 | Up | 5.20E-09 | 7.27E-09 |

|                |   |    |       |      |             |    |          |          |
|----------------|---|----|-------|------|-------------|----|----------|----------|
| novel_pirl608  | 0 | 20 | 0.001 | 0.99 | 9.951284715 | Up | 1.28E-08 | 1.78E-08 |
| novel_pir946   | 0 | 20 | 0.001 | 0.99 | 9.951284715 | Up | 1.28E-08 | 1.78E-08 |
| novel_pir2136  | 0 | 20 | 0.001 | 0.99 | 9.951284715 | Up | 1.28E-08 | 1.77E-08 |
| novel_pirl507  | 0 | 20 | 0.001 | 0.99 | 9.951284715 | Up | 1.28E-08 | 1.77E-08 |
| novel_pirl511  | 0 | 20 | 0.001 | 0.99 | 9.951284715 | Up | 1.28E-08 | 1.77E-08 |
| novel_pirl021  | 0 | 20 | 0.001 | 0.99 | 9.951284715 | Up | 1.28E-08 | 1.77E-08 |
| novel_pirl131  | 0 | 20 | 0.001 | 0.99 | 9.951284715 | Up | 1.28E-08 | 1.77E-08 |
| novel_pir2048  | 0 | 20 | 0.001 | 0.99 | 9.951284715 | Up | 1.28E-08 | 1.77E-08 |
| novel_pirl097  | 0 | 20 | 0.001 | 0.99 | 9.951284715 | Up | 1.28E-08 | 1.77E-08 |
| mmu_piR_024221 | 0 | 20 | 0.001 | 0.99 | 9.951284715 | Up | 1.28E-08 | 1.77E-08 |
| novel_pir433   | 0 | 20 | 0.001 | 0.99 | 9.951284715 | Up | 1.28E-08 | 1.76E-08 |
| novel_pir958   | 0 | 20 | 0.001 | 0.99 | 9.951284715 | Up | 1.28E-08 | 1.76E-08 |
| novel_pirl005  | 0 | 20 | 0.001 | 0.99 | 9.951284715 | Up | 1.28E-08 | 1.76E-08 |
| novel_pir673   | 0 | 20 | 0.001 | 0.99 | 9.951284715 | Up | 1.28E-08 | 1.76E-08 |
| novel_pirl700  | 0 | 20 | 0.001 | 0.99 | 9.951284715 | Up | 1.28E-08 | 1.76E-08 |
| novel_pir964   | 0 | 20 | 0.001 | 0.99 | 9.951284715 | Up | 1.28E-08 | 1.76E-08 |
| novel_pir2223  | 0 | 20 | 0.001 | 0.99 | 9.951284715 | Up | 1.28E-08 | 1.76E-08 |
| novel_pir906   | 0 | 19 | 0.001 | 0.94 | 9.876516947 | Up | 3.14E-08 | 4.30E-08 |
| novel_pir2301  | 0 | 19 | 0.001 | 0.94 | 9.876516947 | Up | 3.14E-08 | 4.29E-08 |
| novel_pir757   | 0 | 19 | 0.001 | 0.94 | 9.876516947 | Up | 3.14E-08 | 4.29E-08 |
| novel_pir88    | 0 | 19 | 0.001 | 0.94 | 9.876516947 | Up | 3.14E-08 | 4.29E-08 |
| novel_pirl803  | 0 | 19 | 0.001 | 0.94 | 9.876516947 | Up | 3.14E-08 | 4.29E-08 |
| novel_pirl824  | 0 | 19 | 0.001 | 0.94 | 9.876516947 | Up | 3.14E-08 | 4.28E-08 |
| mmu_piR_004567 | 0 | 19 | 0.001 | 0.94 | 9.876516947 | Up | 3.14E-08 | 4.28E-08 |
| novel_pirl963  | 0 | 19 | 0.001 | 0.94 | 9.876516947 | Up | 3.14E-08 | 4.28E-08 |
| novel_pirl1115 | 0 | 19 | 0.001 | 0.94 | 9.876516947 | Up | 3.14E-08 | 4.27E-08 |
| novel_pir2159  | 0 | 19 | 0.001 | 0.94 | 9.876516947 | Up | 3.14E-08 | 4.27E-08 |
| novel_pirl031  | 0 | 19 | 0.001 | 0.94 | 9.876516947 | Up | 3.14E-08 | 4.27E-08 |
| novel_pirl256  | 0 | 19 | 0.001 | 0.94 | 9.876516947 | Up | 3.14E-08 | 4.26E-08 |
| novel_pirl043  | 0 | 19 | 0.001 | 0.94 | 9.876516947 | Up | 3.14E-08 | 4.26E-08 |
| novel_pir731   | 0 | 19 | 0.001 | 0.94 | 9.876516947 | Up | 3.14E-08 | 4.26E-08 |
| novel_pirl226  | 0 | 19 | 0.001 | 0.94 | 9.876516947 | Up | 3.14E-08 | 4.25E-08 |
| novel_pir503   | 0 | 19 | 0.001 | 0.94 | 9.876516947 | Up | 3.14E-08 | 4.25E-08 |
| novel_pir219   | 0 | 19 | 0.001 | 0.94 | 9.876516947 | Up | 3.14E-08 | 4.25E-08 |
| novel_pirl057  | 0 | 19 | 0.001 | 0.94 | 9.876516947 | Up | 3.14E-08 | 4.25E-08 |
| novel_pir352   | 0 | 19 | 0.001 | 0.94 | 9.876516947 | Up | 3.14E-08 | 4.24E-08 |

|               |   |    |       |      |             |    |          |          |
|---------------|---|----|-------|------|-------------|----|----------|----------|
| novel_pirl610 | 0 | 18 | 0.001 | 0.89 | 9.797661526 | Up | 7.70E-08 | 1.04E-07 |
| novel_pir797  | 0 | 18 | 0.001 | 0.89 | 9.797661526 | Up | 7.70E-08 | 1.03E-07 |
| novel_pir93   | 0 | 18 | 0.001 | 0.89 | 9.797661526 | Up | 7.70E-08 | 1.03E-07 |
| novel_pir826  | 0 | 18 | 0.001 | 0.89 | 9.797661526 | Up | 7.70E-08 | 1.03E-07 |
| novel_pirl267 | 0 | 18 | 0.001 | 0.89 | 9.797661526 | Up | 7.70E-08 | 1.03E-07 |
| novel_pir2400 | 0 | 18 | 0.001 | 0.89 | 9.797661526 | Up | 7.70E-08 | 1.03E-07 |
| novel_pir218  | 0 | 18 | 0.001 | 0.89 | 9.797661526 | Up | 7.70E-08 | 1.03E-07 |
| novel_pir2335 | 0 | 18 | 0.001 | 0.89 | 9.797661526 | Up | 7.70E-08 | 1.03E-07 |
| novel_pir2453 | 0 | 18 | 0.001 | 0.89 | 9.797661526 | Up | 7.70E-08 | 1.03E-07 |
| novel_pir2388 | 0 | 18 | 0.001 | 0.89 | 9.797661526 | Up | 7.70E-08 | 1.03E-07 |
| novel_pirl927 | 0 | 18 | 0.001 | 0.89 | 9.797661526 | Up | 7.70E-08 | 1.03E-07 |
| novel_pirl671 | 0 | 18 | 0.001 | 0.89 | 9.797661526 | Up | 7.70E-08 | 1.03E-07 |
| novel_pir2240 | 0 | 18 | 0.001 | 0.89 | 9.797661526 | Up | 7.70E-08 | 1.03E-07 |
| novel_pir321  | 0 | 18 | 0.001 | 0.89 | 9.797661526 | Up | 7.70E-08 | 1.03E-07 |
| novel_pirl543 | 0 | 18 | 0.001 | 0.89 | 9.797661526 | Up | 7.70E-08 | 1.03E-07 |
| novel_pirl624 | 0 | 18 | 0.001 | 0.89 | 9.797661526 | Up | 7.70E-08 | 1.02E-07 |
| novel_pir668  | 0 | 18 | 0.001 | 0.89 | 9.797661526 | Up | 7.70E-08 | 1.02E-07 |
| novel_pirl583 | 0 | 18 | 0.001 | 0.89 | 9.797661526 | Up | 7.70E-08 | 1.02E-07 |
| novel_pir2312 | 0 | 18 | 0.001 | 0.89 | 9.797661526 | Up | 7.70E-08 | 1.02E-07 |
| novel_pir815  | 0 | 18 | 0.001 | 0.89 | 9.797661526 | Up | 7.70E-08 | 1.02E-07 |
| novel_pir2467 | 0 | 17 | 0.001 | 0.84 | 9.714245518 | Up | 1.89E-07 | 2.50E-07 |
| novel_pirl288 | 0 | 17 | 0.001 | 0.84 | 9.714245518 | Up | 1.89E-07 | 2.50E-07 |
| novel_pir570  | 0 | 17 | 0.001 | 0.84 | 9.714245518 | Up | 1.89E-07 | 2.50E-07 |
| novel_pirl360 | 0 | 17 | 0.001 | 0.84 | 9.714245518 | Up | 1.89E-07 | 2.50E-07 |
| novel_pir791  | 0 | 17 | 0.001 | 0.84 | 9.714245518 | Up | 1.89E-07 | 2.49E-07 |
| novel_pir963  | 0 | 17 | 0.001 | 0.84 | 9.714245518 | Up | 1.89E-07 | 2.49E-07 |
| novel_pirl326 | 0 | 17 | 0.001 | 0.84 | 9.714245518 | Up | 1.89E-07 | 2.49E-07 |
| novel_pirl358 | 0 | 17 | 0.001 | 0.84 | 9.714245518 | Up | 1.89E-07 | 2.49E-07 |
| novel_pirl141 | 0 | 17 | 0.001 | 0.84 | 9.714245518 | Up | 1.89E-07 | 2.49E-07 |
| novel_pirl324 | 0 | 17 | 0.001 | 0.84 | 9.714245518 | Up | 1.89E-07 | 2.49E-07 |
| novel_pir2381 | 0 | 17 | 0.001 | 0.84 | 9.714245518 | Up | 1.89E-07 | 2.48E-07 |
| novel_pir2415 | 0 | 17 | 0.001 | 0.84 | 9.714245518 | Up | 1.89E-07 | 2.48E-07 |
| novel_pir2333 | 0 | 17 | 0.001 | 0.84 | 9.714245518 | Up | 1.89E-07 | 2.48E-07 |
| novel_pirl004 | 0 | 17 | 0.001 | 0.84 | 9.714245518 | Up | 1.89E-07 | 2.48E-07 |
| novel_pirl333 | 0 | 17 | 0.001 | 0.84 | 9.714245518 | Up | 1.89E-07 | 2.48E-07 |
| novel_pir2304 | 0 | 17 | 0.001 | 0.84 | 9.714245518 | Up | 1.89E-07 | 2.48E-07 |

|               |   |    |       |      |             |    |          |          |
|---------------|---|----|-------|------|-------------|----|----------|----------|
| novel_pir2204 | 0 | 17 | 0.001 | 0.84 | 9.714245518 | Up | 1.89E-07 | 2.47E-07 |
| novel_pir1237 | 0 | 17 | 0.001 | 0.84 | 9.714245518 | Up | 1.89E-07 | 2.47E-07 |
| novel_pir1439 | 0 | 17 | 0.001 | 0.84 | 9.714245518 | Up | 1.89E-07 | 2.47E-07 |
| novel_pir2090 | 0 | 17 | 0.001 | 0.84 | 9.714245518 | Up | 1.89E-07 | 2.47E-07 |
| novel_pir640  | 0 | 17 | 0.001 | 0.84 | 9.714245518 | Up | 1.89E-07 | 2.47E-07 |
| novel_pir78   | 0 | 17 | 0.001 | 0.84 | 9.714245518 | Up | 1.89E-07 | 2.47E-07 |
| novel_pir920  | 0 | 16 | 0.001 | 0.79 | 9.625708843 | Up | 4.65E-07 | 6.04E-07 |
| novel_pir2424 | 0 | 16 | 0.001 | 0.79 | 9.625708843 | Up | 4.65E-07 | 6.03E-07 |
| novel_pir1376 | 0 | 16 | 0.001 | 0.79 | 9.625708843 | Up | 4.65E-07 | 6.03E-07 |
| novel_pir156  | 0 | 16 | 0.001 | 0.79 | 9.625708843 | Up | 4.65E-07 | 6.02E-07 |
| novel_pir101  | 0 | 16 | 0.001 | 0.79 | 9.625708843 | Up | 4.65E-07 | 6.02E-07 |
| novel_pir1573 | 0 | 16 | 0.001 | 0.79 | 9.625708843 | Up | 4.65E-07 | 6.02E-07 |
| novel_pir378  | 0 | 16 | 0.001 | 0.79 | 9.625708843 | Up | 4.65E-07 | 6.01E-07 |
| novel_pir790  | 0 | 16 | 0.001 | 0.79 | 9.625708843 | Up | 4.65E-07 | 6.01E-07 |
| novel_pir475  | 0 | 16 | 0.001 | 0.79 | 9.625708843 | Up | 4.65E-07 | 6.00E-07 |
| novel_pir1343 | 0 | 16 | 0.001 | 0.79 | 9.625708843 | Up | 4.65E-07 | 6.00E-07 |
| novel_pir544  | 0 | 16 | 0.001 | 0.79 | 9.625708843 | Up | 4.65E-07 | 6.00E-07 |
| novel_pir1489 | 0 | 16 | 0.001 | 0.79 | 9.625708843 | Up | 4.65E-07 | 5.99E-07 |
| novel_pir1177 | 0 | 16 | 0.001 | 0.79 | 9.625708843 | Up | 4.65E-07 | 5.99E-07 |
| novel_pir1154 | 0 | 16 | 0.001 | 0.79 | 9.625708843 | Up | 4.65E-07 | 5.98E-07 |
| novel_pir833  | 0 | 16 | 0.001 | 0.79 | 9.625708843 | Up | 4.65E-07 | 5.98E-07 |
| novel_pir2379 | 0 | 16 | 0.001 | 0.79 | 9.625708843 | Up | 4.65E-07 | 5.98E-07 |
| novel_pir174  | 0 | 16 | 0.001 | 0.79 | 9.625708843 | Up | 4.65E-07 | 5.97E-07 |
| novel_pir1823 | 0 | 16 | 0.001 | 0.79 | 9.625708843 | Up | 4.65E-07 | 5.97E-07 |
| novel_pir356  | 0 | 16 | 0.001 | 0.79 | 9.625708843 | Up | 4.65E-07 | 5.96E-07 |
| novel_pir2071 | 0 | 16 | 0.001 | 0.79 | 9.625708843 | Up | 4.65E-07 | 5.96E-07 |
| novel_pir856  | 0 | 16 | 0.001 | 0.79 | 9.625708843 | Up | 4.65E-07 | 5.96E-07 |
| novel_pir670  | 0 | 16 | 0.001 | 0.79 | 9.625708843 | Up | 4.65E-07 | 5.95E-07 |
| novel_pir1039 | 0 | 16 | 0.001 | 0.79 | 9.625708843 | Up | 4.65E-07 | 5.95E-07 |
| novel_pir1842 | 0 | 15 | 0.001 | 0.74 | 9.531381461 | Up | 1.14E-06 | 1.45E-06 |
| novel_pir2429 | 0 | 15 | 0.001 | 0.74 | 9.531381461 | Up | 1.14E-06 | 1.45E-06 |
| novel_pir1899 | 0 | 15 | 0.001 | 0.74 | 9.531381461 | Up | 1.14E-06 | 1.45E-06 |
| novel_pir151  | 0 | 15 | 0.001 | 0.74 | 9.531381461 | Up | 1.14E-06 | 1.45E-06 |
| novel_pir413  | 0 | 15 | 0.001 | 0.74 | 9.531381461 | Up | 1.14E-06 | 1.45E-06 |
| novel_pir1729 | 0 | 15 | 0.001 | 0.74 | 9.531381461 | Up | 1.14E-06 | 1.45E-06 |
| novel_pir653  | 0 | 15 | 0.001 | 0.74 | 9.531381461 | Up | 1.14E-06 | 1.45E-06 |

|               |   |    |       |      |             |    |          |          |
|---------------|---|----|-------|------|-------------|----|----------|----------|
| novel_pirl867 | 0 | 15 | 0.001 | 0.74 | 9.531381461 | Up | 1.14E-06 | 1.44E-06 |
| novel_pirl915 | 0 | 15 | 0.001 | 0.74 | 9.531381461 | Up | 1.14E-06 | 1.44E-06 |
| novel_pir2334 | 0 | 15 | 0.001 | 0.74 | 9.531381461 | Up | 1.14E-06 | 1.44E-06 |
| novel_pirl751 | 0 | 15 | 0.001 | 0.74 | 9.531381461 | Up | 1.14E-06 | 1.44E-06 |
| novel_pir429  | 0 | 15 | 0.001 | 0.74 | 9.531381461 | Up | 1.14E-06 | 1.44E-06 |
| novel_pirl365 | 0 | 15 | 0.001 | 0.74 | 9.531381461 | Up | 1.14E-06 | 1.44E-06 |
| novel_pir214  | 0 | 15 | 0.001 | 0.74 | 9.531381461 | Up | 1.14E-06 | 1.44E-06 |
| novel_pirl090 | 0 | 15 | 0.001 | 0.74 | 9.531381461 | Up | 1.14E-06 | 1.44E-06 |
| novel_pirl099 | 0 | 15 | 0.001 | 0.74 | 9.531381461 | Up | 1.14E-06 | 1.44E-06 |
| novel_pirl210 | 0 | 15 | 0.001 | 0.74 | 9.531381461 | Up | 1.14E-06 | 1.44E-06 |
| novel_pir823  | 0 | 15 | 0.001 | 0.74 | 9.531381461 | Up | 1.14E-06 | 1.44E-06 |
| novel_pir837  | 0 | 15 | 0.001 | 0.74 | 9.531381461 | Up | 1.14E-06 | 1.43E-06 |
| novel_pirl825 | 0 | 15 | 0.001 | 0.74 | 9.531381461 | Up | 1.14E-06 | 1.43E-06 |
| novel_pirl174 | 0 | 14 | 0.001 | 0.69 | 9.430452552 | Up | 2.80E-06 | 3.49E-06 |
| novel_pir2282 | 0 | 14 | 0.001 | 0.69 | 9.430452552 | Up | 2.80E-06 | 3.49E-06 |
| novel_pirl116 | 0 | 14 | 0.001 | 0.69 | 9.430452552 | Up | 2.80E-06 | 3.48E-06 |
| novel_pir292  | 0 | 14 | 0.001 | 0.69 | 9.430452552 | Up | 2.80E-06 | 3.48E-06 |
| novel_pir902  | 0 | 14 | 0.001 | 0.69 | 9.430452552 | Up | 2.80E-06 | 3.48E-06 |
| novel_pirl038 | 0 | 14 | 0.001 | 0.69 | 9.430452552 | Up | 2.80E-06 | 3.48E-06 |
| novel_pirl381 | 0 | 14 | 0.001 | 0.69 | 9.430452552 | Up | 2.80E-06 | 3.48E-06 |
| novel_pir956  | 0 | 14 | 0.001 | 0.69 | 9.430452552 | Up | 2.80E-06 | 3.47E-06 |
| novel_pirl020 | 0 | 14 | 0.001 | 0.69 | 9.430452552 | Up | 2.80E-06 | 3.47E-06 |
| novel_pir511  | 0 | 14 | 0.001 | 0.69 | 9.430452552 | Up | 2.80E-06 | 3.47E-06 |
| novel_pirl313 | 0 | 14 | 0.001 | 0.69 | 9.430452552 | Up | 2.80E-06 | 3.47E-06 |
| novel_pirl962 | 0 | 14 | 0.001 | 0.69 | 9.430452552 | Up | 2.80E-06 | 3.46E-06 |
| novel_pirl160 | 0 | 14 | 0.001 | 0.69 | 9.430452552 | Up | 2.80E-06 | 3.46E-06 |
| novel_pirl951 | 0 | 14 | 0.001 | 0.69 | 9.430452552 | Up | 2.80E-06 | 3.46E-06 |
| novel_pir466  | 0 | 14 | 0.001 | 0.69 | 9.430452552 | Up | 2.80E-06 | 3.46E-06 |
| novel_pirl551 | 0 | 14 | 0.001 | 0.69 | 9.430452552 | Up | 2.80E-06 | 3.46E-06 |
| novel_pir2447 | 0 | 14 | 0.001 | 0.69 | 9.430452552 | Up | 2.80E-06 | 3.45E-06 |
| novel_pirl917 | 0 | 14 | 0.001 | 0.69 | 9.430452552 | Up | 2.80E-06 | 3.45E-06 |
| novel_pir2353 | 0 | 14 | 0.001 | 0.69 | 9.430452552 | Up | 2.80E-06 | 3.45E-06 |
| novel_pir2113 | 0 | 14 | 0.001 | 0.69 | 9.430452552 | Up | 2.80E-06 | 3.45E-06 |
| novel_pir370  | 0 | 14 | 0.001 | 0.69 | 9.430452552 | Up | 2.80E-06 | 3.44E-06 |
| novel_pirl956 | 0 | 14 | 0.001 | 0.69 | 9.430452552 | Up | 2.80E-06 | 3.44E-06 |
| novel_pirl292 | 0 | 14 | 0.001 | 0.69 | 9.430452552 | Up | 2.80E-06 | 3.44E-06 |

|                |   |    |       |      |             |    |          |          |
|----------------|---|----|-------|------|-------------|----|----------|----------|
| novel_pir1847  | 0 | 14 | 0.001 | 0.69 | 9.430452552 | Up | 2.80E-06 | 3.44E-06 |
| novel_pir268   | 0 | 14 | 0.001 | 0.69 | 9.430452552 | Up | 2.80E-06 | 3.44E-06 |
| novel_pir1075  | 0 | 14 | 0.001 | 0.69 | 9.430452552 | Up | 2.80E-06 | 3.43E-06 |
| novel_pir1308  | 0 | 13 | 0.001 | 0.64 | 9.321928095 | Up | 6.88E-06 | 8.38E-06 |
| novel_pir1858  | 0 | 13 | 0.001 | 0.64 | 9.321928095 | Up | 6.88E-06 | 8.37E-06 |
| novel_pir2023  | 0 | 13 | 0.001 | 0.64 | 9.321928095 | Up | 6.88E-06 | 8.37E-06 |
| novel_pir1909  | 0 | 13 | 0.001 | 0.64 | 9.321928095 | Up | 6.88E-06 | 8.36E-06 |
| novel_pir2329  | 0 | 13 | 0.001 | 0.64 | 9.321928095 | Up | 6.88E-06 | 8.36E-06 |
| novel_pir737   | 0 | 13 | 0.001 | 0.64 | 9.321928095 | Up | 6.88E-06 | 8.35E-06 |
| novel_pir163   | 0 | 13 | 0.001 | 0.64 | 9.321928095 | Up | 6.88E-06 | 8.35E-06 |
| novel_pir773   | 0 | 13 | 0.001 | 0.64 | 9.321928095 | Up | 6.88E-06 | 8.34E-06 |
| novel_pir2245  | 0 | 13 | 0.001 | 0.64 | 9.321928095 | Up | 6.88E-06 | 8.34E-06 |
| novel_pir881   | 0 | 13 | 0.001 | 0.64 | 9.321928095 | Up | 6.88E-06 | 8.33E-06 |
| novel_pir1765  | 0 | 13 | 0.001 | 0.64 | 9.321928095 | Up | 6.88E-06 | 8.33E-06 |
| mmu_piR_037320 | 0 | 13 | 0.001 | 0.64 | 9.321928095 | Up | 6.88E-06 | 8.32E-06 |
| novel_pir586   | 0 | 13 | 0.001 | 0.64 | 9.321928095 | Up | 6.88E-06 | 8.32E-06 |
| novel_pir1673  | 0 | 13 | 0.001 | 0.64 | 9.321928095 | Up | 6.88E-06 | 8.31E-06 |
| novel_pir271   | 0 | 13 | 0.001 | 0.64 | 9.321928095 | Up | 6.88E-06 | 8.31E-06 |
| novel_pir698   | 0 | 13 | 0.001 | 0.64 | 9.321928095 | Up | 6.88E-06 | 8.30E-06 |
| novel_pir2074  | 0 | 13 | 0.001 | 0.64 | 9.321928095 | Up | 6.88E-06 | 8.30E-06 |
| novel_pir1121  | 0 | 13 | 0.001 | 0.64 | 9.321928095 | Up | 6.88E-06 | 8.29E-06 |
| novel_pir1255  | 0 | 13 | 0.001 | 0.64 | 9.321928095 | Up | 6.88E-06 | 8.29E-06 |
| novel_pir1898  | 0 | 13 | 0.001 | 0.64 | 9.321928095 | Up | 6.88E-06 | 8.28E-06 |
| novel_pir1127  | 0 | 13 | 0.001 | 0.64 | 9.321928095 | Up | 6.88E-06 | 8.28E-06 |
| novel_pir1158  | 0 | 13 | 0.001 | 0.64 | 9.321928095 | Up | 6.88E-06 | 8.27E-06 |
| novel_pir2211  | 0 | 13 | 0.001 | 0.64 | 9.321928095 | Up | 6.88E-06 | 8.26E-06 |
| novel_pir269   | 0 | 13 | 0.001 | 0.64 | 9.321928095 | Up | 6.88E-06 | 8.26E-06 |
| novel_pir216   | 0 | 13 | 0.001 | 0.64 | 9.321928095 | Up | 6.88E-06 | 8.25E-06 |
| novel_pir2003  | 0 | 13 | 0.001 | 0.64 | 9.321928095 | Up | 6.88E-06 | 8.25E-06 |
| novel_pir1562  | 0 | 13 | 0.001 | 0.64 | 9.321928095 | Up | 6.88E-06 | 8.24E-06 |
| novel_pir208   | 0 | 13 | 0.001 | 0.64 | 9.321928095 | Up | 6.88E-06 | 8.24E-06 |
| novel_pir633   | 0 | 13 | 0.001 | 0.64 | 9.321928095 | Up | 6.88E-06 | 8.23E-06 |
| novel_pir536   | 0 | 13 | 0.001 | 0.64 | 9.321928095 | Up | 6.88E-06 | 8.23E-06 |
| novel_pir1227  | 0 | 13 | 0.001 | 0.64 | 9.321928095 | Up | 6.88E-06 | 8.22E-06 |
| novel_pir2057  | 0 | 13 | 0.001 | 0.64 | 9.321928095 | Up | 6.88E-06 | 8.22E-06 |
| novel_pir316   | 0 | 13 | 0.001 | 0.64 | 9.321928095 | Up | 6.88E-06 | 8.21E-06 |

|                |   |    |       |      |             |    |          |          |
|----------------|---|----|-------|------|-------------|----|----------|----------|
| novel_pir1701  | 0 | 13 | 0.001 | 0.64 | 9.321928095 | Up | 6.88E-06 | 8.21E-06 |
| novel_pir2368  | 0 | 13 | 0.001 | 0.64 | 9.321928095 | Up | 6.88E-06 | 8.20E-06 |
| novel_pir999   | 0 | 13 | 0.001 | 0.64 | 9.321928095 | Up | 6.88E-06 | 8.20E-06 |
| novel_pir1144  | 0 | 13 | 0.001 | 0.64 | 9.321928095 | Up | 6.88E-06 | 8.19E-06 |
| novel_pir1548  | 0 | 13 | 0.001 | 0.64 | 9.321928095 | Up | 6.88E-06 | 8.19E-06 |
| novel_pir2309  | 0 | 13 | 0.001 | 0.64 | 9.321928095 | Up | 6.88E-06 | 8.18E-06 |
| novel_pir1341  | 0 | 13 | 0.001 | 0.64 | 9.321928095 | Up | 6.88E-06 | 8.18E-06 |
| novel_pir572   | 0 | 12 | 0.001 | 0.6  | 9.22881869  | Up | 1.69E-05 | 1.99E-05 |
| novel_pir415   | 0 | 12 | 0.001 | 0.6  | 9.22881869  | Up | 1.69E-05 | 1.99E-05 |
| novel_pir2438  | 0 | 12 | 0.001 | 0.6  | 9.22881869  | Up | 1.69E-05 | 1.99E-05 |
| novel_pir1460  | 0 | 12 | 0.001 | 0.6  | 9.22881869  | Up | 1.69E-05 | 1.99E-05 |
| novel_pir338   | 0 | 12 | 0.001 | 0.6  | 9.22881869  | Up | 1.69E-05 | 1.99E-05 |
| novel_pir787   | 0 | 12 | 0.001 | 0.6  | 9.22881869  | Up | 1.69E-05 | 1.99E-05 |
| novel_pir1515  | 0 | 12 | 0.001 | 0.6  | 9.22881869  | Up | 1.69E-05 | 1.99E-05 |
| novel_pir609   | 0 | 12 | 0.001 | 0.6  | 9.22881869  | Up | 1.69E-05 | 1.98E-05 |
| novel_pir851   | 0 | 12 | 0.001 | 0.6  | 9.22881869  | Up | 1.69E-05 | 1.98E-05 |
| novel_pir184   | 0 | 12 | 0.001 | 0.6  | 9.22881869  | Up | 1.69E-05 | 1.98E-05 |
| novel_pir1183  | 0 | 12 | 0.001 | 0.6  | 9.22881869  | Up | 1.69E-05 | 1.98E-05 |
| novel_pir1476  | 0 | 12 | 0.001 | 0.6  | 9.22881869  | Up | 1.69E-05 | 1.98E-05 |
| novel_pir2268  | 0 | 12 | 0.001 | 0.6  | 9.22881869  | Up | 1.69E-05 | 1.98E-05 |
| novel_pir2244  | 0 | 12 | 0.001 | 0.6  | 9.22881869  | Up | 1.69E-05 | 1.98E-05 |
| novel_pir1620  | 0 | 12 | 0.001 | 0.6  | 9.22881869  | Up | 1.69E-05 | 1.98E-05 |
| novel_pir1735  | 0 | 12 | 0.001 | 0.6  | 9.22881869  | Up | 1.69E-05 | 1.97E-05 |
| novel_pir178   | 0 | 12 | 0.001 | 0.6  | 9.22881869  | Up | 1.69E-05 | 1.97E-05 |
| novel_pir1838  | 0 | 12 | 0.001 | 0.6  | 9.22881869  | Up | 1.69E-05 | 1.97E-05 |
| mmu_piR_000362 | 0 | 12 | 0.001 | 0.6  | 9.22881869  | Up | 1.69E-05 | 1.97E-05 |
| novel_pir1421  | 0 | 12 | 0.001 | 0.6  | 9.22881869  | Up | 1.69E-05 | 1.97E-05 |
| novel_pir788   | 0 | 12 | 0.001 | 0.6  | 9.22881869  | Up | 1.69E-05 | 1.97E-05 |
| novel_pir254   | 0 | 12 | 0.001 | 0.6  | 9.22881869  | Up | 1.69E-05 | 1.97E-05 |
| novel_pir362   | 0 | 12 | 0.001 | 0.6  | 9.22881869  | Up | 1.69E-05 | 1.97E-05 |
| novel_pir1590  | 0 | 12 | 0.001 | 0.6  | 9.22881869  | Up | 1.69E-05 | 1.97E-05 |
| novel_pir418   | 0 | 12 | 0.001 | 0.6  | 9.22881869  | Up | 1.69E-05 | 1.96E-05 |
| novel_pir581   | 0 | 12 | 0.001 | 0.6  | 9.22881869  | Up | 1.69E-05 | 1.96E-05 |
| novel_pir1480  | 0 | 12 | 0.001 | 0.6  | 9.22881869  | Up | 1.69E-05 | 1.96E-05 |
| novel_pir2419  | 0 | 12 | 0.001 | 0.6  | 9.22881869  | Up | 1.69E-05 | 1.96E-05 |
| novel_pir645   | 0 | 12 | 0.001 | 0.6  | 9.22881869  | Up | 1.69E-05 | 1.96E-05 |



|               |   |    |       |      |             |    |          |          |
|---------------|---|----|-------|------|-------------|----|----------|----------|
| novel_pir871  | 0 | 12 | 0.001 | 0.6  | 9.22881869  | Up | 1.69E-05 | 1.96E-05 |
| novel_pir1578 | 0 | 12 | 0.001 | 0.6  | 9.22881869  | Up | 1.69E-05 | 1.96E-05 |
| novel_pir2286 | 0 | 12 | 0.001 | 0.6  | 9.22881869  | Up | 1.69E-05 | 1.96E-05 |
| novel_pir1830 | 0 | 12 | 0.001 | 0.6  | 9.22881869  | Up | 1.69E-05 | 1.95E-05 |
| novel_pir621  | 0 | 12 | 0.001 | 0.6  | 9.22881869  | Up | 1.69E-05 | 1.95E-05 |
| novel_pir2256 | 0 | 12 | 0.001 | 0.6  | 9.22881869  | Up | 1.69E-05 | 1.95E-05 |
| novel_pir2087 | 0 | 12 | 0.001 | 0.6  | 9.22881869  | Up | 1.69E-05 | 1.95E-05 |
| novel_pir1427 | 0 | 12 | 0.001 | 0.6  | 9.22881869  | Up | 1.69E-05 | 1.95E-05 |
| novel_pir969  | 0 | 11 | 0.001 | 0.55 | 9.103287808 | Up | 4.15E-05 | 4.76E-05 |
| novel_pir2142 | 0 | 11 | 0.001 | 0.55 | 9.103287808 | Up | 4.15E-05 | 4.76E-05 |
| novel_pir1912 | 0 | 11 | 0.001 | 0.55 | 9.103287808 | Up | 4.15E-05 | 4.75E-05 |
| novel_pir1160 | 0 | 11 | 0.001 | 0.55 | 9.103287808 | Up | 4.15E-05 | 4.75E-05 |
| novel_pir2054 | 0 | 11 | 0.001 | 0.55 | 9.103287808 | Up | 4.15E-05 | 4.75E-05 |
| novel_pir285  | 0 | 11 | 0.001 | 0.55 | 9.103287808 | Up | 4.15E-05 | 4.75E-05 |
| novel_pir700  | 0 | 11 | 0.001 | 0.55 | 9.103287808 | Up | 4.15E-05 | 4.74E-05 |
| novel_pir1621 | 0 | 11 | 0.001 | 0.55 | 9.103287808 | Up | 4.15E-05 | 4.74E-05 |
| novel_pir944  | 0 | 11 | 0.001 | 0.55 | 9.103287808 | Up | 4.15E-05 | 4.74E-05 |
| novel_pir1044 | 0 | 11 | 0.001 | 0.55 | 9.103287808 | Up | 4.15E-05 | 4.74E-05 |
| novel_pir2024 | 0 | 11 | 0.001 | 0.55 | 9.103287808 | Up | 4.15E-05 | 4.73E-05 |
| novel_pir2171 | 0 | 11 | 0.001 | 0.55 | 9.103287808 | Up | 4.15E-05 | 4.73E-05 |
| novel_pir1769 | 0 | 11 | 0.001 | 0.55 | 9.103287808 | Up | 4.15E-05 | 4.73E-05 |
| novel_pir257  | 0 | 11 | 0.001 | 0.55 | 9.103287808 | Up | 4.15E-05 | 4.72E-05 |
| novel_pir1816 | 0 | 11 | 0.001 | 0.55 | 9.103287808 | Up | 4.15E-05 | 4.72E-05 |
| novel_pir764  | 0 | 11 | 0.001 | 0.55 | 9.103287808 | Up | 4.15E-05 | 4.72E-05 |
| novel_pir1582 | 0 | 11 | 0.001 | 0.55 | 9.103287808 | Up | 4.15E-05 | 4.72E-05 |
| novel_pir521  | 0 | 11 | 0.001 | 0.55 | 9.103287808 | Up | 4.15E-05 | 4.71E-05 |
| novel_pir1943 | 0 | 11 | 0.001 | 0.55 | 9.103287808 | Up | 4.15E-05 | 4.71E-05 |
| novel_pir542  | 0 | 11 | 0.001 | 0.55 | 9.103287808 | Up | 4.15E-05 | 4.71E-05 |
| novel_pir1185 | 0 | 11 | 0.001 | 0.55 | 9.103287808 | Up | 4.15E-05 | 4.70E-05 |
| novel_pir904  | 0 | 11 | 0.001 | 0.55 | 9.103287808 | Up | 4.15E-05 | 4.70E-05 |
| novel_pir423  | 0 | 11 | 0.001 | 0.55 | 9.103287808 | Up | 4.15E-05 | 4.70E-05 |
| novel_pir304  | 0 | 11 | 0.001 | 0.55 | 9.103287808 | Up | 4.15E-05 | 4.70E-05 |
| novel_pir1815 | 0 | 11 | 0.001 | 0.55 | 9.103287808 | Up | 4.15E-05 | 4.69E-05 |
| novel_pir799  | 0 | 11 | 0.001 | 0.55 | 9.103287808 | Up | 4.15E-05 | 4.69E-05 |
| novel_pir406  | 0 | 11 | 0.001 | 0.55 | 9.103287808 | Up | 4.15E-05 | 4.69E-05 |
| novel_pir2072 | 0 | 11 | 0.001 | 0.55 | 9.103287808 | Up | 4.15E-05 | 4.69E-05 |

|               |   |    |       |      |             |    |             |             |
|---------------|---|----|-------|------|-------------|----|-------------|-------------|
| novel_pir808  | 0 | 11 | 0.001 | 0.55 | 9.103287808 | Up | 4.15E-05    | 4.68E-05    |
| novel_pir2206 | 0 | 11 | 0.001 | 0.55 | 9.103287808 | Up | 4.15E-05    | 4.68E-05    |
| novel_pir746  | 0 | 11 | 0.001 | 0.55 | 9.103287808 | Up | 4.15E-05    | 4.68E-05    |
| novel_pir1908 | 0 | 11 | 0.001 | 0.55 | 9.103287808 | Up | 4.15E-05    | 4.67E-05    |
| novel_pir1690 | 0 | 11 | 0.001 | 0.55 | 9.103287808 | Up | 4.15E-05    | 4.67E-05    |
| novel_pir1245 | 0 | 11 | 0.001 | 0.55 | 9.103287808 | Up | 4.15E-05    | 4.67E-05    |
| novel_pir927  | 0 | 11 | 0.001 | 0.55 | 9.103287808 | Up | 4.15E-05    | 4.67E-05    |
| novel_pir1615 | 0 | 11 | 0.001 | 0.55 | 9.103287808 | Up | 4.15E-05    | 4.66E-05    |
| novel_pir2374 | 0 | 11 | 0.001 | 0.55 | 9.103287808 | Up | 4.15E-05    | 4.66E-05    |
| novel_pir849  | 0 | 11 | 0.001 | 0.55 | 9.103287808 | Up | 4.15E-05    | 4.66E-05    |
| novel_pir2185 | 0 | 11 | 0.001 | 0.55 | 9.103287808 | Up | 4.15E-05    | 4.66E-05    |
| novel_pir796  | 0 | 11 | 0.001 | 0.55 | 9.103287808 | Up | 4.15E-05    | 4.65E-05    |
| novel_pir2348 | 0 | 11 | 0.001 | 0.55 | 9.103287808 | Up | 4.15E-05    | 4.65E-05    |
| novel_pir913  | 0 | 11 | 0.001 | 0.55 | 9.103287808 | Up | 4.15E-05    | 4.65E-05    |
| novel_pir1813 | 0 | 11 | 0.001 | 0.55 | 9.103287808 | Up | 4.15E-05    | 4.64E-05    |
| novel_pir2110 | 0 | 11 | 0.001 | 0.55 | 9.103287808 | Up | 4.15E-05    | 4.64E-05    |
| novel_pir804  | 0 | 11 | 0.001 | 0.55 | 9.103287808 | Up | 4.15E-05    | 4.64E-05    |
| novel_pir895  | 0 | 11 | 0.001 | 0.55 | 9.103287808 | Up | 4.15E-05    | 4.64E-05    |
| novel_pir1919 | 0 | 11 | 0.001 | 0.55 | 9.103287808 | Up | 4.15E-05    | 4.63E-05    |
| novel_pir2470 | 0 | 11 | 0.001 | 0.55 | 9.103287808 | Up | 4.15E-05    | 4.63E-05    |
| novel_pir25   | 0 | 11 | 0.001 | 0.55 | 9.103287808 | Up | 4.15E-05    | 4.63E-05    |
| novel_pir1628 | 0 | 10 | 0.001 | 0.5  | 8.965784285 | Up | 0.000101972 | 0.000112835 |
| novel_pir1112 | 0 | 10 | 0.001 | 0.5  | 8.965784285 | Up | 0.000101972 | 0.000112771 |
| novel_pir769  | 0 | 10 | 0.001 | 0.5  | 8.965784285 | Up | 0.000101972 | 0.000112706 |
| novel_pir1338 | 0 | 10 | 0.001 | 0.5  | 8.965784285 | Up | 0.000101972 | 0.000112642 |
| novel_pir1042 | 0 | 10 | 0.001 | 0.5  | 8.965784285 | Up | 0.000101972 | 0.000112578 |
| novel_pir317  | 0 | 10 | 0.001 | 0.5  | 8.965784285 | Up | 0.000101972 | 0.000112513 |
| novel_pir2060 | 0 | 10 | 0.001 | 0.5  | 8.965784285 | Up | 0.000101972 | 0.000112449 |
| novel_pir407  | 0 | 10 | 0.001 | 0.5  | 8.965784285 | Up | 0.000101972 | 0.000112385 |
| novel_pir1196 | 0 | 10 | 0.001 | 0.5  | 8.965784285 | Up | 0.000101972 | 0.000112321 |
| novel_pir2156 | 0 | 10 | 0.001 | 0.5  | 8.965784285 | Up | 0.000101972 | 0.000112257 |
| novel_pir1488 | 0 | 10 | 0.001 | 0.5  | 8.965784285 | Up | 0.000101972 | 0.000112193 |
| novel_pir2160 | 0 | 10 | 0.001 | 0.5  | 8.965784285 | Up | 0.000101972 | 0.000112129 |
| novel_pir1821 | 0 | 10 | 0.001 | 0.5  | 8.965784285 | Up | 0.000101972 | 0.000112065 |
| novel_pir357  | 0 | 10 | 0.001 | 0.5  | 8.965784285 | Up | 0.000101972 | 0.000112002 |
| novel_pir1059 | 0 | 10 | 0.001 | 0.5  | 8.965784285 | Up | 0.000101972 | 0.000111938 |

|                |   |    |       |     |             |    |             |             |
|----------------|---|----|-------|-----|-------------|----|-------------|-------------|
| novel_pir2432  | 0 | 10 | 0.001 | 0.5 | 8.965784285 | Up | 0.000101972 | 0.000111874 |
| novel_pir1657  | 0 | 10 | 0.001 | 0.5 | 8.965784285 | Up | 0.000101972 | 0.000111811 |
| novel_pir506   | 0 | 10 | 0.001 | 0.5 | 8.965784285 | Up | 0.000101972 | 0.000111747 |
| novel_pir1347  | 0 | 10 | 0.001 | 0.5 | 8.965784285 | Up | 0.000101972 | 0.000111684 |
| novel_pir638   | 0 | 10 | 0.001 | 0.5 | 8.965784285 | Up | 0.000101972 | 0.000111621 |
| mmu_piR_002945 | 0 | 10 | 0.001 | 0.5 | 8.965784285 | Up | 0.000101972 | 0.000111558 |
| novel_pir1868  | 0 | 10 | 0.001 | 0.5 | 8.965784285 | Up | 0.000101972 | 0.000111494 |
| novel_pir1585  | 0 | 10 | 0.001 | 0.5 | 8.965784285 | Up | 0.000101972 | 0.000111431 |
| novel_pir641   | 0 | 10 | 0.001 | 0.5 | 8.965784285 | Up | 0.000101972 | 0.000111368 |
| mmu_piR_011141 | 0 | 10 | 0.001 | 0.5 | 8.965784285 | Up | 0.000101972 | 0.000111305 |
| novel_pir736   | 0 | 10 | 0.001 | 0.5 | 8.965784285 | Up | 0.000101972 | 0.000111243 |
| novel_pir225   | 0 | 10 | 0.001 | 0.5 | 8.965784285 | Up | 0.000101972 | 0.00011118  |
| novel_pir450   | 0 | 10 | 0.001 | 0.5 | 8.965784285 | Up | 0.000101972 | 0.000111117 |
| novel_pir462   | 0 | 10 | 0.001 | 0.5 | 8.965784285 | Up | 0.000101972 | 0.000111054 |
| novel_pir1033  | 0 | 10 | 0.001 | 0.5 | 8.965784285 | Up | 0.000101972 | 0.000110992 |
| novel_pir36    | 0 | 10 | 0.001 | 0.5 | 8.965784285 | Up | 0.000101972 | 0.000110929 |
| novel_pir162   | 0 | 10 | 0.001 | 0.5 | 8.965784285 | Up | 0.000101972 | 0.000110867 |
| novel_pir1865  | 0 | 10 | 0.001 | 0.5 | 8.965784285 | Up | 0.000101972 | 0.000110805 |
| novel_pir1990  | 0 | 10 | 0.001 | 0.5 | 8.965784285 | Up | 0.000101972 | 0.000110742 |
| novel_pir169   | 0 | 10 | 0.001 | 0.5 | 8.965784285 | Up | 0.000101972 | 0.00011068  |
| novel_pir937   | 0 | 10 | 0.001 | 0.5 | 8.965784285 | Up | 0.000101972 | 0.000110618 |
| novel_pir704   | 0 | 10 | 0.001 | 0.5 | 8.965784285 | Up | 0.000101972 | 0.000110556 |
| novel_pir564   | 0 | 10 | 0.001 | 0.5 | 8.965784285 | Up | 0.000101972 | 0.000110494 |
| novel_pir1032  | 0 | 10 | 0.001 | 0.5 | 8.965784285 | Up | 0.000101972 | 0.000110432 |
| novel_pir985   | 0 | 10 | 0.001 | 0.5 | 8.965784285 | Up | 0.000101972 | 0.00011037  |
| novel_pir1056  | 0 | 10 | 0.001 | 0.5 | 8.965784285 | Up | 0.000101972 | 0.000110308 |
| novel_pir811   | 0 | 10 | 0.001 | 0.5 | 8.965784285 | Up | 0.000101972 | 0.000110247 |
| novel_pir1404  | 0 | 10 | 0.001 | 0.5 | 8.965784285 | Up | 0.000101972 | 0.000110185 |
| novel_pir141   | 0 | 10 | 0.001 | 0.5 | 8.965784285 | Up | 0.000101972 | 0.000110123 |
| novel_pir479   | 0 | 10 | 0.001 | 0.5 | 8.965784285 | Up | 0.000101972 | 0.000110062 |
| novel_pir1206  | 0 | 10 | 0.001 | 0.5 | 8.965784285 | Up | 0.000101972 | 0.00011     |
| novel_pir2373  | 0 | 10 | 0.001 | 0.5 | 8.965784285 | Up | 0.000101972 | 0.000109939 |
| novel_pir2276  | 0 | 10 | 0.001 | 0.5 | 8.965784285 | Up | 0.000101972 | 0.000109878 |
| novel_pir1412  | 0 | 10 | 0.001 | 0.5 | 8.965784285 | Up | 0.000101972 | 0.000109816 |
| novel_pir1229  | 0 | 10 | 0.001 | 0.5 | 8.965784285 | Up | 0.000101972 | 0.000109755 |
| novel_pir1833  | 0 | 10 | 0.001 | 0.5 | 8.965784285 | Up | 0.000101972 | 0.000109694 |

|                |      |       |        |         |              |      |             |             |
|----------------|------|-------|--------|---------|--------------|------|-------------|-------------|
| novel_pir1808  | 0    | 10    | 0.001  | 0.5     | 8.965784285  | Up   | 0.000101972 | 0.000109633 |
| novel_pir344   | 0    | 10    | 0.001  | 0.5     | 8.965784285  | Up   | 0.000101972 | 0.000109572 |
| novel_pir120   | 0    | 10    | 0.001  | 0.5     | 8.965784285  | Up   | 0.000101972 | 0.000109511 |
| novel_pir1103  | 0    | 10    | 0.001  | 0.5     | 8.965784285  | Up   | 0.000101972 | 0.00010945  |
| novel_pir73    | 0    | 10    | 0.001  | 0.5     | 8.965784285  | Up   | 0.000101972 | 0.00010939  |
| novel_pir1780  | 0    | 10    | 0.001  | 0.5     | 8.965784285  | Up   | 0.000101972 | 0.000109329 |
| novel_pir1013  | 0    | 10    | 0.001  | 0.5     | 8.965784285  | Up   | 0.000101972 | 0.000109268 |
| novel_pir311   | 0    | 10    | 0.001  | 0.5     | 8.965784285  | Up   | 0.000101972 | 0.000109208 |
| novel_pir1001  | 0    | 10    | 0.001  | 0.5     | 8.965784285  | Up   | 0.000101972 | 0.000109147 |
| novel_pir2439  | 0    | 10    | 0.001  | 0.5     | 8.965784285  | Up   | 0.000101972 | 0.000109087 |
| novel_pir861   | 0    | 10    | 0.001  | 0.5     | 8.965784285  | Up   | 0.000101972 | 0.000109026 |
| novel_pir501   | 0    | 10    | 0.001  | 0.5     | 8.965784285  | Up   | 0.000101972 | 0.000108966 |
| novel_pir189   | 0    | 10    | 0.001  | 0.5     | 8.965784285  | Up   | 0.000101972 | 0.000108906 |
| novel_pir288   | 0    | 10    | 0.001  | 0.5     | 8.965784285  | Up   | 0.000101972 | 0.000108846 |
| novel_pir758   | 0    | 10    | 0.001  | 0.5     | 8.965784285  | Up   | 0.000101972 | 0.000108786 |
| novel_pir749   | 0    | 10    | 0.001  | 0.5     | 8.965784285  | Up   | 0.000101972 | 0.000108726 |
| novel_pir2241  | 0    | 10    | 0.001  | 0.5     | 8.965784285  | Up   | 0.000101972 | 0.000108666 |
| novel_pir2098  | 0    | 10    | 0.001  | 0.5     | 8.965784285  | Up   | 0.000101972 | 0.000108606 |
| novel_pir2365  | 0    | 10    | 0.001  | 0.5     | 8.965784285  | Up   | 0.000101972 | 0.000108546 |
| novel_pir426   | 0    | 10    | 0.001  | 0.5     | 8.965784285  | Up   | 0.000101972 | 0.000108486 |
| mmu_piR_000442 | 0    | 8     | 0.001  | 0.4     | 8.64385619   | Up   | 0.0006151   | 0.000644454 |
| mmu_piR_012500 | 0    | 8     | 0.001  | 0.4     | 8.64385619   | Up   | 0.0006151   | 0.000644105 |
| mmu_piR_028051 | 1    | 81    | 0.03   | 4.02    | 7.06608919   | Up   | 9.95E-31    | 2.24E-30    |
| mmu_piR_022097 | 32   | 1478  | 1.09   | 73.29   | 6.071216324  | Up   | 0           | 0           |
| mmu_piR_000870 | 1    | 39    | 0.03   | 1.93    | 6.007494537  | Up   | 1.22E-14    | 2.07E-14    |
| mmu_piR_000159 | 3    | 93    | 0.1    | 4.61    | 5.526694846  | Up   | 1.31E-32    | 3.04E-32    |
| mmu_piR_000958 | 1    | 24    | 0.03   | 1.19    | 5.309855263  | Up   | 5.55E-09    | 7.76E-09    |
| mmu_piR_000935 | 2838 | 52145 | 96.65  | 2585.62 | 4.74159672   | Up   | 0           | 0           |
| mmu_piR_038322 | 1    | 16    | 0.03   | 0.79    | 4.718818247  | Up   | 5.15E-06    | 6.27E-06    |
| mmu_piR_038312 | 1    | 15    | 0.03   | 0.74    | 4.624490865  | Up   | 1.20E-05    | 1.42E-05    |
| mmu_piR_033077 | 2    | 23    | 0.07   | 1.14    | 4.025535092  | Up   | 1.04E-07    | 1.38E-07    |
| novel_pir2034  | 1123 | 7145  | 38.24  | 354.29  | 3.211776317  | Up   | 0           | 0           |
| novel_pir2037  | 247  | 464   | 8.41   | 23.01   | 1.452083278  | Up   | 1.13E-39    | 2.94E-39    |
| novel_pir150   | 21   | 38    | 0.72   | 1.88    | 1.38466385   | Up   | 0.00025209  | 0.000266432 |
| novel_pir125   | 4195 | 0     | 142.86 | 0.001   | -17.1242425  | Down | 0           | 0           |
| novel_pir13    | 1438 | 0     | 48.97  | 0.001   | -15.57961058 | Down | 0           | 0           |

|               |      |   |       |       |              |      |           |           |
|---------------|------|---|-------|-------|--------------|------|-----------|-----------|
| novel_pir230  | 1224 | 0 | 41.68 | 0.001 | -15.34706766 | Down | 1.40E-278 | 1.18E-276 |
| novel_pir14   | 1223 | 0 | 41.65 | 0.001 | -15.34602888 | Down | 2.36E-278 | 1.90E-276 |
| novel_pir615  | 991  | 0 | 33.75 | 0.001 | -15.04259988 | Down | 1.13E-225 | 8.08E-224 |
| novel_pir229  | 857  | 0 | 29.19 | 0.001 | -14.83318659 | Down | 3.02E-195 | 1.94E-193 |
| novel_pir340  | 856  | 0 | 29.15 | 0.001 | -14.83120826 | Down | 5.09E-195 | 3.07E-193 |
| novel_pir123  | 853  | 0 | 29.05 | 0.001 | -14.82625054 | Down | 2.44E-194 | 1.43E-192 |
| novel_pir130  | 837  | 0 | 28.5  | 0.001 | -14.7986743  | Down | 1.05E-190 | 5.96E-189 |
| novel_pir131  | 786  | 0 | 26.77 | 0.001 | -14.70832952 | Down | 3.99E-179 | 2.20E-177 |
| novel_pir863  | 778  | 0 | 26.5  | 0.001 | -14.69370474 | Down | 2.62E-177 | 1.40E-175 |
| novel_pir728  | 764  | 0 | 26.02 | 0.001 | -14.66733334 | Down | 3.95E-174 | 2.06E-172 |
| novel_pir273  | 745  | 0 | 25.37 | 0.001 | -14.6308359  | Down | 8.14E-170 | 4.03E-168 |
| novel_pir961  | 743  | 0 | 25.3  | 0.001 | -14.62684976 | Down | 2.32E-169 | 1.12E-167 |
| novel_pir136  | 720  | 0 | 24.52 | 0.001 | -14.58167136 | Down | 3.87E-164 | 1.82E-162 |
| novel_pir1524 | 686  | 0 | 23.36 | 0.001 | -14.51175265 | Down | 2.03E-156 | 9.12E-155 |
| novel_pir611  | 675  | 0 | 22.99 | 0.001 | -14.48871885 | Down | 6.39E-154 | 2.80E-152 |
| novel_pir2175 | 670  | 0 | 22.82 | 0.001 | -14.47801117 | Down | 8.72E-153 | 3.74E-151 |
| novel_pir1517 | 663  | 0 | 22.58 | 0.001 | -14.46275787 | Down | 3.39E-151 | 1.42E-149 |
| novel_pir778  | 661  | 0 | 22.51 | 0.001 | -14.45827844 | Down | 9.64E-151 | 3.96E-149 |
| novel_pir1581 | 637  | 0 | 21.69 | 0.001 | -14.40474243 | Down | 2.71E-145 | 1.07E-143 |
| novel_pir967  | 627  | 0 | 21.35 | 0.001 | -14.38194845 | Down | 5.06E-143 | 1.96E-141 |
| novel_pir2332 | 625  | 0 | 21.28 | 0.001 | -14.37721053 | Down | 1.44E-142 | 5.46E-141 |
| novel_pir711  | 617  | 0 | 21.01 | 0.001 | -14.35878854 | Down | 9.44E-141 | 3.44E-139 |
| novel_pir1994 | 616  | 0 | 20.98 | 0.001 | -14.35672706 | Down | 1.59E-140 | 5.70E-139 |
| novel_pir2237 | 612  | 0 | 20.84 | 0.001 | -14.34706766 | Down | 1.29E-139 | 4.53E-138 |
| novel_pir79   | 599  | 0 | 20.4  | 0.001 | -14.31628153 | Down | 1.15E-136 | 3.91E-135 |
| novel_pir780  | 597  | 0 | 20.33 | 0.001 | -14.31132259 | Down | 3.28E-136 | 1.09E-134 |
| novel_pir10   | 588  | 0 | 20.02 | 0.001 | -14.28915435 | Down | 3.63E-134 | 1.19E-132 |
| novel_pir47   | 580  | 0 | 19.75 | 0.001 | -14.26956503 | Down | 2.38E-132 | 7.66E-131 |
| novel_pir2321 | 568  | 0 | 19.34 | 0.001 | -14.23930017 | Down | 1.26E-129 | 3.93E-128 |
| novel_pir1707 | 560  | 0 | 19.07 | 0.001 | -14.21901722 | Down | 8.27E-128 | 2.54E-126 |
| novel_pir1262 | 556  | 0 | 18.93 | 0.001 | -14.20838679 | Down | 6.70E-127 | 2.02E-125 |
| novel_pir1368 | 550  | 0 | 18.73 | 0.001 | -14.19306328 | Down | 1.54E-125 | 4.59E-124 |
| novel_pir1334 | 532  | 0 | 18.12 | 0.001 | -14.14529533 | Down | 1.89E-121 | 5.52E-120 |
| novel_pir1179 | 519  | 0 | 17.67 | 0.001 | -14.10901442 | Down | 1.69E-118 | 4.80E-117 |
| novel_pir166  | 517  | 0 | 17.61 | 0.001 | -14.10410729 | Down | 4.80E-118 | 1.34E-116 |
| novel_pir766  | 512  | 0 | 17.44 | 0.001 | -14.09011242 | Down | 6.56E-117 | 1.81E-115 |

|               |     |   |       |       |              |      |           |           |
|---------------|-----|---|-------|-------|--------------|------|-----------|-----------|
| novel_pir228  | 510 | 0 | 17.37 | 0.001 | -14.08431013 | Down | 1.87E-116 | 5.08E-115 |
| novel_pir551  | 508 | 0 | 17.3  | 0.001 | -14.07848442 | Down | 5.31E-116 | 1.41E-114 |
| novel_pir2184 | 507 | 0 | 17.27 | 0.001 | -14.07598046 | Down | 8.96E-116 | 2.34E-114 |
| novel_pir126  | 502 | 0 | 17.1  | 0.001 | -14.0617087  | Down | 1.22E-114 | 3.15E-113 |
| novel_pir1382 | 500 | 0 | 17.03 | 0.001 | -14.05579081 | Down | 3.48E-114 | 8.85E-113 |
| novel_pir1207 | 495 | 0 | 16.86 | 0.001 | -14.04131692 | Down | 4.75E-113 | 1.19E-111 |
| novel_pir2257 | 491 | 0 | 16.72 | 0.001 | -14.02928723 | Down | 3.85E-112 | 9.53E-111 |
| novel_pir2099 | 484 | 0 | 16.48 | 0.001 | -14.00842862 | Down | 1.49E-110 | 3.66E-109 |
| novel_pir67   | 484 | 0 | 16.48 | 0.001 | -14.00842862 | Down | 1.49E-110 | 3.61E-109 |
| novel_pir1734 | 484 | 0 | 16.48 | 0.001 | -14.00842862 | Down | 1.49E-110 | 3.57E-109 |
| novel_pir2083 | 483 | 0 | 16.45 | 0.001 | -14.00579996 | Down | 2.52E-110 | 5.94E-109 |
| novel_pir3    | 480 | 0 | 16.35 | 0.001 | -13.99700302 | Down | 1.21E-109 | 2.82E-108 |
| novel_pir617  | 476 | 0 | 16.21 | 0.001 | -13.98459647 | Down | 9.80E-109 | 2.25E-107 |
| novel_pir2049 | 476 | 0 | 16.21 | 0.001 | -13.98459647 | Down | 9.80E-109 | 2.23E-107 |
| novel_pir6    | 476 | 0 | 16.21 | 0.001 | -13.98459647 | Down | 9.80E-109 | 2.20E-107 |
| novel_pir628  | 472 | 0 | 16.07 | 0.001 | -13.97208231 | Down | 7.93E-108 | 1.74E-106 |
| novel_pir364  | 471 | 0 | 16.04 | 0.001 | -13.96938652 | Down | 1.34E-107 | 2.90E-106 |
| novel_pir329  | 469 | 0 | 15.97 | 0.001 | -13.96307669 | Down | 3.81E-107 | 8.17E-106 |
| novel_pir573  | 468 | 0 | 15.94 | 0.001 | -13.96036401 | Down | 6.42E-107 | 1.36E-105 |
| novel_pir2086 | 466 | 0 | 15.87 | 0.001 | -13.95401451 | Down | 1.83E-106 | 3.84E-105 |
| novel_pir226  | 464 | 0 | 15.8  | 0.001 | -13.94763694 | Down | 5.20E-106 | 1.08E-104 |
| novel_pir1655 | 462 | 0 | 15.73 | 0.001 | -13.94123105 | Down | 1.48E-105 | 3.04E-104 |
| novel_pir872  | 461 | 0 | 15.7  | 0.001 | -13.93847694 | Down | 2.50E-105 | 5.07E-104 |
| novel_pir1406 | 460 | 0 | 15.67 | 0.001 | -13.93571756 | Down | 4.21E-105 | 8.47E-104 |
| novel_pir111  | 459 | 0 | 15.63 | 0.001 | -13.93203016 | Down | 7.10E-105 | 1.41E-103 |
| novel_pir2214 | 458 | 0 | 15.6  | 0.001 | -13.92925841 | Down | 1.20E-104 | 2.36E-103 |
| novel_pir195  | 458 | 0 | 15.6  | 0.001 | -13.92925841 | Down | 1.20E-104 | 2.34E-103 |
| novel_pir2306 | 458 | 0 | 15.6  | 0.001 | -13.92925841 | Down | 1.20E-104 | 2.31E-103 |
| novel_pir68   | 458 | 0 | 15.6  | 0.001 | -13.92925841 | Down | 1.20E-104 | 2.29E-103 |
| novel_pir547  | 456 | 0 | 15.53 | 0.001 | -13.92277021 | Down | 3.41E-104 | 6.45E-103 |
| novel_pir2093 | 455 | 0 | 15.5  | 0.001 | -13.9199806  | Down | 5.75E-104 | 1.08E-102 |
| novel_pir1148 | 450 | 0 | 15.32 | 0.001 | -13.90312868 | Down | 7.85E-103 | 1.46E-101 |
| novel_pir1215 | 449 | 0 | 15.29 | 0.001 | -13.90030079 | Down | 1.32E-102 | 2.44E-101 |
| novel_pir1161 | 447 | 0 | 15.22 | 0.001 | -13.89368074 | Down | 3.77E-102 | 6.80E-101 |
| novel_pir2026 | 445 | 0 | 15.15 | 0.001 | -13.88703017 | Down | 1.07E-101 | 1.92E-100 |
| novel_pir2271 | 443 | 0 | 15.09 | 0.001 | -13.88130519 | Down | 3.05E-101 | 5.41E-100 |

|               |     |   |       |       |              |      |           |          |
|---------------|-----|---|-------|-------|--------------|------|-----------|----------|
| novel_pir348  | 441 | 0 | 15.02 | 0.001 | -13.87459719 | Down | 8.68E-101 | 1.51E-99 |
| novel_pir469  | 438 | 0 | 14.92 | 0.001 | -13.86495992 | Down | 4.16E-100 | 7.18E-99 |
| novel_pir1705 | 438 | 0 | 14.92 | 0.001 | -13.86495992 | Down | 4.16E-100 | 7.12E-99 |
| novel_pir380  | 436 | 0 | 14.85 | 0.001 | -13.85817531 | Down | 1.18E-99  | 2.01E-98 |
| novel_pir2263 | 436 | 0 | 14.85 | 0.001 | -13.85817531 | Down | 1.18E-99  | 1.99E-98 |
| novel_pir575  | 433 | 0 | 14.75 | 0.001 | -13.84842733 | Down | 5.69E-99  | 9.47E-98 |
| novel_pir1258 | 433 | 0 | 14.75 | 0.001 | -13.84842733 | Down | 5.69E-99  | 9.39E-98 |
| novel_pir347  | 432 | 0 | 14.71 | 0.001 | -13.84450963 | Down | 9.59E-99  | 1.57E-97 |
| novel_pir400  | 432 | 0 | 14.71 | 0.001 | -13.84450963 | Down | 9.59E-99  | 1.56E-97 |
| novel_pir1937 | 432 | 0 | 14.71 | 0.001 | -13.84450963 | Down | 9.59E-99  | 1.54E-97 |
| novel_pir1689 | 430 | 0 | 14.64 | 0.001 | -13.83762793 | Down | 2.73E-98  | 4.36E-97 |
| novel_pir1716 | 430 | 0 | 14.64 | 0.001 | -13.83762793 | Down | 2.73E-98  | 4.32E-97 |
| novel_pir809  | 429 | 0 | 14.61 | 0.001 | -13.83466856 | Down | 4.60E-98  | 7.23E-97 |
| novel_pir1073 | 429 | 0 | 14.61 | 0.001 | -13.83466856 | Down | 4.60E-98  | 7.17E-97 |
| novel_pir2139 | 429 | 0 | 14.61 | 0.001 | -13.83466856 | Down | 4.60E-98  | 7.12E-97 |
| novel_pir1218 | 429 | 0 | 14.61 | 0.001 | -13.83466856 | Down | 4.60E-98  | 7.06E-97 |
| novel_pir2095 | 427 | 0 | 14.54 | 0.001 | -13.82773965 | Down | 1.31E-97  | 1.99E-96 |
| novel_pir1881 | 427 | 0 | 14.54 | 0.001 | -13.82773965 | Down | 1.31E-97  | 1.98E-96 |
| novel_pir1055 | 426 | 0 | 14.51 | 0.001 | -13.8247599  | Down | 2.21E-97  | 3.31E-96 |
| novel_pir2059 | 422 | 0 | 14.37 | 0.001 | -13.81077244 | Down | 1.79E-96  | 2.66E-95 |
| novel_pir651  | 420 | 0 | 14.3  | 0.001 | -13.80372753 | Down | 5.09E-96  | 7.51E-95 |
| novel_pir820  | 417 | 0 | 14.2  | 0.001 | -13.79360331 | Down | 2.44E-95  | 3.52E-94 |
| novel_pir2226 | 416 | 0 | 14.17 | 0.001 | -13.79055214 | Down | 4.12E-95  | 5.85E-94 |
| novel_pir204  | 416 | 0 | 14.17 | 0.001 | -13.79055214 | Down | 4.12E-95  | 5.81E-94 |
| novel_pir1065 | 413 | 0 | 14.06 | 0.001 | -13.77930897 | Down | 1.98E-94  | 2.77E-93 |
| novel_pir119  | 412 | 0 | 14.03 | 0.001 | -13.77622739 | Down | 3.34E-94  | 4.64E-93 |
| novel_pir2018 | 412 | 0 | 14.03 | 0.001 | -13.77622739 | Down | 3.34E-94  | 4.60E-93 |
| novel_pir1395 | 412 | 0 | 14.03 | 0.001 | -13.77622739 | Down | 3.34E-94  | 4.57E-93 |
| novel_pir1684 | 412 | 0 | 14.03 | 0.001 | -13.77622739 | Down | 3.34E-94  | 4.54E-93 |
| novel_pir1441 | 411 | 0 | 14    | 0.001 | -13.77313921 | Down | 5.63E-94  | 7.60E-93 |
| novel_pir1159 | 408 | 0 | 13.89 | 0.001 | -13.76175898 | Down | 2.70E-93  | 3.62E-92 |
| novel_pir495  | 407 | 0 | 13.86 | 0.001 | -13.75863964 | Down | 4.56E-93  | 6.07E-92 |
| novel_pir1100 | 405 | 0 | 13.79 | 0.001 | -13.75133484 | Down | 1.30E-92  | 1.72E-91 |
| novel_pir22   | 405 | 0 | 13.79 | 0.001 | -13.75133484 | Down | 1.30E-92  | 1.70E-91 |
| novel_pir1775 | 404 | 0 | 13.76 | 0.001 | -13.74819285 | Down | 2.19E-92  | 2.85E-91 |
| novel_pir2105 | 403 | 0 | 13.72 | 0.001 | -13.74399286 | Down | 3.69E-92  | 4.78E-91 |

|               |     |   |       |       |              |      |          |          |
|---------------|-----|---|-------|-------|--------------|------|----------|----------|
| novel_pir2395 | 403 | 0 | 13.72 | 0.001 | -13.74399286 | Down | 3.69E-92 | 4.75E-91 |
| novel_pir1900 | 403 | 0 | 13.72 | 0.001 | -13.74399286 | Down | 3.69E-92 | 4.72E-91 |
| novel_pir783  | 401 | 0 | 13.66 | 0.001 | -13.73766986 | Down | 1.05E-91 | 1.33E-90 |
| novel_pir115  | 401 | 0 | 13.66 | 0.001 | -13.73766986 | Down | 1.05E-91 | 1.32E-90 |
| novel_pir1465 | 400 | 0 | 13.62 | 0.001 | -13.73343908 | Down | 1.77E-91 | 2.21E-90 |
| novel_pir396  | 399 | 0 | 13.59 | 0.001 | -13.73025784 | Down | 2.99E-91 | 3.70E-90 |
| novel_pir2193 | 398 | 0 | 13.55 | 0.001 | -13.72600523 | Down | 5.04E-91 | 6.20E-90 |
| novel_pir917  | 397 | 0 | 13.52 | 0.001 | -13.72280753 | Down | 8.50E-91 | 1.03E-89 |
| novel_pir1643 | 397 | 0 | 13.52 | 0.001 | -13.72280753 | Down | 8.50E-91 | 1.03E-89 |
| novel_pir2423 | 397 | 0 | 13.52 | 0.001 | -13.72280753 | Down | 8.50E-91 | 1.02E-89 |
| novel_pir315  | 397 | 0 | 13.52 | 0.001 | -13.72280753 | Down | 8.50E-91 | 1.01E-89 |
| novel_pir612  | 397 | 0 | 13.52 | 0.001 | -13.72280753 | Down | 8.50E-91 | 1.01E-89 |
| novel_pir1114 | 395 | 0 | 13.45 | 0.001 | -13.71531855 | Down | 2.42E-90 | 2.85E-89 |
| novel_pir1028 | 394 | 0 | 13.42 | 0.001 | -13.71209705 | Down | 4.08E-90 | 4.77E-89 |
| novel_pir2354 | 394 | 0 | 13.42 | 0.001 | -13.71209705 | Down | 4.08E-90 | 4.75E-89 |
| novel_pir1659 | 393 | 0 | 13.38 | 0.001 | -13.7077905  | Down | 6.88E-90 | 7.91E-89 |
| novel_pir516  | 393 | 0 | 13.38 | 0.001 | -13.7077905  | Down | 6.88E-90 | 7.86E-89 |
| novel_pir1359 | 391 | 0 | 13.32 | 0.001 | -13.70130646 | Down | 1.96E-89 | 2.22E-88 |
| novel_pir876  | 388 | 0 | 13.21 | 0.001 | -13.68934285 | Down | 9.39E-89 | 1.05E-87 |
| novel_pir751  | 388 | 0 | 13.21 | 0.001 | -13.68934285 | Down | 9.39E-89 | 1.04E-87 |
| novel_pir1088 | 388 | 0 | 13.21 | 0.001 | -13.68934285 | Down | 9.39E-89 | 1.04E-87 |
| novel_pir1862 | 388 | 0 | 13.21 | 0.001 | -13.68934285 | Down | 9.39E-89 | 1.03E-87 |
| novel_pir2411 | 387 | 0 | 13.18 | 0.001 | -13.68606275 | Down | 1.58E-88 | 1.73E-87 |
| novel_pir1340 | 387 | 0 | 13.18 | 0.001 | -13.68606275 | Down | 1.58E-88 | 1.72E-87 |
| novel_pir23   | 387 | 0 | 13.18 | 0.001 | -13.68606275 | Down | 1.58E-88 | 1.71E-87 |
| novel_pir571  | 386 | 0 | 13.15 | 0.001 | -13.68277518 | Down | 2.67E-88 | 2.87E-87 |
| novel_pir1241 | 386 | 0 | 13.15 | 0.001 | -13.68277518 | Down | 2.67E-88 | 2.85E-87 |
| novel_pir314  | 386 | 0 | 13.15 | 0.001 | -13.68277518 | Down | 2.67E-88 | 2.84E-87 |
| novel_pir346  | 386 | 0 | 13.15 | 0.001 | -13.68277518 | Down | 2.67E-88 | 2.82E-87 |
| novel_pir2192 | 385 | 0 | 13.11 | 0.001 | -13.67838007 | Down | 4.51E-88 | 4.73E-87 |
| novel_pir1481 | 384 | 0 | 13.08 | 0.001 | -13.67507492 | Down | 7.60E-88 | 7.94E-87 |
| novel_pir1670 | 382 | 0 | 13.01 | 0.001 | -13.66733334 | Down | 2.16E-87 | 2.25E-86 |
| novel_pir713  | 381 | 0 | 12.98 | 0.001 | -13.66400276 | Down | 3.65E-87 | 3.77E-86 |
| novel_pir540  | 381 | 0 | 12.98 | 0.001 | -13.66400276 | Down | 3.65E-87 | 3.75E-86 |
| novel_pir481  | 381 | 0 | 12.98 | 0.001 | -13.66400276 | Down | 3.65E-87 | 3.73E-86 |
| novel_pir282  | 381 | 0 | 12.98 | 0.001 | -13.66400276 | Down | 3.65E-87 | 3.71E-86 |



|               |     |   |       |       |              |      |          |          |
|---------------|-----|---|-------|-------|--------------|------|----------|----------|
| novel_pir974  | 381 | 0 | 12.98 | 0.001 | -13.66400276 | Down | 3.65E-87 | 3.69E-86 |
| novel_pir959  | 381 | 0 | 12.98 | 0.001 | -13.66400276 | Down | 3.65E-87 | 3.67E-86 |
| novel_pir548  | 380 | 0 | 12.94 | 0.001 | -13.65955    | Down | 6.16E-87 | 6.13E-86 |
| novel_pir669  | 380 | 0 | 12.94 | 0.001 | -13.65955    | Down | 6.16E-87 | 6.10E-86 |
| novel_pir1740 | 379 | 0 | 12.91 | 0.001 | -13.65620138 | Down | 1.04E-86 | 1.02E-85 |
| novel_pir1727 | 379 | 0 | 12.91 | 0.001 | -13.65620138 | Down | 1.04E-86 | 1.02E-85 |
| novel_pir2254 | 378 | 0 | 12.87 | 0.001 | -13.65172443 | Down | 1.75E-86 | 1.71E-85 |
| novel_pir545  | 378 | 0 | 12.87 | 0.001 | -13.65172443 | Down | 1.75E-86 | 1.70E-85 |
| novel_pir697  | 377 | 0 | 12.84 | 0.001 | -13.64835758 | Down | 2.95E-86 | 2.85E-85 |
| novel_pir2289 | 376 | 0 | 12.8  | 0.001 | -13.64385619 | Down | 4.98E-86 | 4.79E-85 |
| novel_pir2101 | 376 | 0 | 12.8  | 0.001 | -13.64385619 | Down | 4.98E-86 | 4.77E-85 |
| novel_pir2375 | 375 | 0 | 12.77 | 0.001 | -13.6404709  | Down | 8.41E-86 | 8.00E-85 |
| novel_pir1985 | 374 | 0 | 12.74 | 0.001 | -13.63707766 | Down | 1.42E-85 | 1.34E-84 |
| novel_pir1721 | 373 | 0 | 12.7  | 0.001 | -13.63254088 | Down | 2.39E-85 | 2.25E-84 |
| novel_pir1034 | 373 | 0 | 12.7  | 0.001 | -13.63254088 | Down | 2.39E-85 | 2.24E-84 |
| novel_pir1294 | 372 | 0 | 12.67 | 0.001 | -13.6291289  | Down | 4.04E-85 | 3.77E-84 |
| novel_pir1750 | 371 | 0 | 12.63 | 0.001 | -13.62456702 | Down | 6.81E-85 | 6.32E-84 |
| novel_pir2176 | 371 | 0 | 12.63 | 0.001 | -13.62456702 | Down | 6.81E-85 | 6.29E-84 |
| novel_pir688  | 370 | 0 | 12.6  | 0.001 | -13.62113611 | Down | 1.15E-84 | 1.05E-83 |
| novel_pir278  | 370 | 0 | 12.6  | 0.001 | -13.62113611 | Down | 1.15E-84 | 1.05E-83 |
| novel_pir1388 | 370 | 0 | 12.6  | 0.001 | -13.62113611 | Down | 1.15E-84 | 1.04E-83 |
| novel_pir1984 | 369 | 0 | 12.57 | 0.001 | -13.61769703 | Down | 1.94E-84 | 1.75E-83 |
| novel_pir1942 | 368 | 0 | 12.53 | 0.001 | -13.61309879 | Down | 3.27E-84 | 2.94E-83 |
| novel_pir1269 | 367 | 0 | 12.5  | 0.001 | -13.60964047 | Down | 5.51E-84 | 4.93E-83 |
| novel_pir634  | 367 | 0 | 12.5  | 0.001 | -13.60964047 | Down | 5.51E-84 | 4.91E-83 |
| novel_pir205  | 366 | 0 | 12.46 | 0.001 | -13.60501645 | Down | 9.30E-84 | 8.24E-83 |
| novel_pir124  | 366 | 0 | 12.46 | 0.001 | -13.60501645 | Down | 9.30E-84 | 8.20E-83 |
| novel_pir2265 | 364 | 0 | 12.4  | 0.001 | -13.5980525  | Down | 2.64E-83 | 2.32E-82 |
| novel_pir774  | 364 | 0 | 12.4  | 0.001 | -13.5980525  | Down | 2.64E-83 | 2.31E-82 |
| novel_pir2471 | 364 | 0 | 12.4  | 0.001 | -13.5980525  | Down | 2.64E-83 | 2.30E-82 |
| novel_pir1379 | 364 | 0 | 12.4  | 0.001 | -13.5980525  | Down | 2.64E-83 | 2.29E-82 |
| novel_pir954  | 364 | 0 | 12.4  | 0.001 | -13.5980525  | Down | 2.64E-83 | 2.28E-82 |
| novel_pir448  | 363 | 0 | 12.36 | 0.001 | -13.59339112 | Down | 4.46E-83 | 3.83E-82 |
| novel_pir374  | 362 | 0 | 12.33 | 0.001 | -13.58988518 | Down | 7.53E-83 | 6.43E-82 |
| novel_pir1676 | 362 | 0 | 12.33 | 0.001 | -13.58988518 | Down | 7.53E-83 | 6.40E-82 |
| novel_pir2378 | 361 | 0 | 12.29 | 0.001 | -13.5851973  | Down | 1.27E-82 | 1.07E-81 |

|                |     |   |       |       |              |      |          |          |
|----------------|-----|---|-------|-------|--------------|------|----------|----------|
| novel_pir1804  | 361 | 0 | 12.29 | 0.001 | -13.5851973  | Down | 1.27E-82 | 1.07E-81 |
| novel_pir1232  | 361 | 0 | 12.29 | 0.001 | -13.5851973  | Down | 1.27E-82 | 1.06E-81 |
| novel_pir775   | 360 | 0 | 12.26 | 0.001 | -13.58167136 | Down | 2.14E-82 | 1.78E-81 |
| novel_pir556   | 360 | 0 | 12.26 | 0.001 | -13.58167136 | Down | 2.14E-82 | 1.78E-81 |
| novel_pir682   | 360 | 0 | 12.26 | 0.001 | -13.58167136 | Down | 2.14E-82 | 1.77E-81 |
| novel_pir416   | 359 | 0 | 12.23 | 0.001 | -13.57813678 | Down | 3.61E-82 | 2.97E-81 |
| novel_pir377   | 359 | 0 | 12.23 | 0.001 | -13.57813678 | Down | 3.61E-82 | 2.96E-81 |
| novel_pir2314  | 358 | 0 | 12.19 | 0.001 | -13.57341051 | Down | 6.09E-82 | 4.95E-81 |
| novel_pir743   | 358 | 0 | 12.19 | 0.001 | -13.57341051 | Down | 6.09E-82 | 4.92E-81 |
| novel_pir132   | 358 | 0 | 12.19 | 0.001 | -13.57341051 | Down | 6.09E-82 | 4.90E-81 |
| novel_pir2097  | 356 | 0 | 12.12 | 0.001 | -13.56510208 | Down | 1.73E-81 | 1.39E-80 |
| novel_pir667   | 356 | 0 | 12.12 | 0.001 | -13.56510208 | Down | 1.73E-81 | 1.38E-80 |
| mmu_piR_022820 | 355 | 0 | 12.09 | 0.001 | -13.56152662 | Down | 2.92E-81 | 2.32E-80 |
| novel_pir1260  | 354 | 0 | 12.06 | 0.001 | -13.55794229 | Down | 4.93E-81 | 3.89E-80 |
| novel_pir591   | 354 | 0 | 12.06 | 0.001 | -13.55794229 | Down | 4.93E-81 | 3.87E-80 |
| novel_pir748   | 354 | 0 | 12.06 | 0.001 | -13.55794229 | Down | 4.93E-81 | 3.86E-80 |
| novel_pir1627  | 354 | 0 | 12.06 | 0.001 | -13.55794229 | Down | 4.93E-81 | 3.84E-80 |
| novel_pir1647  | 353 | 0 | 12.02 | 0.001 | -13.55314928 | Down | 8.32E-81 | 6.46E-80 |
| novel_pir1814  | 352 | 0 | 11.99 | 0.001 | -13.54954404 | Down | 1.40E-80 | 1.08E-79 |
| novel_pir1791  | 352 | 0 | 11.99 | 0.001 | -13.54954404 | Down | 1.40E-80 | 1.08E-79 |
| novel_pir1523  | 352 | 0 | 11.99 | 0.001 | -13.54954404 | Down | 1.40E-80 | 1.08E-79 |
| novel_pir710   | 352 | 0 | 11.99 | 0.001 | -13.54954404 | Down | 1.40E-80 | 1.07E-79 |
| novel_pir313   | 351 | 0 | 11.95 | 0.001 | -13.544723   | Down | 2.37E-80 | 1.80E-79 |
| novel_pir1493  | 350 | 0 | 11.92 | 0.001 | -13.54109662 | Down | 3.99E-80 | 3.03E-79 |
| novel_pir369   | 349 | 0 | 11.89 | 0.001 | -13.53746109 | Down | 6.74E-80 | 5.06E-79 |
| novel_pir7     | 349 | 0 | 11.89 | 0.001 | -13.53746109 | Down | 6.74E-80 | 5.04E-79 |
| novel_pir1319  | 349 | 0 | 11.89 | 0.001 | -13.53746109 | Down | 6.74E-80 | 5.02E-79 |
| novel_pir664   | 349 | 0 | 11.89 | 0.001 | -13.53746109 | Down | 6.74E-80 | 5.00E-79 |
| novel_pir862   | 349 | 0 | 11.89 | 0.001 | -13.53746109 | Down | 6.74E-80 | 4.99E-79 |
| novel_pir1415  | 348 | 0 | 11.85 | 0.001 | -13.53259944 | Down | 1.14E-79 | 8.38E-79 |
| novel_pir1012  | 348 | 0 | 11.85 | 0.001 | -13.53259944 | Down | 1.14E-79 | 8.35E-79 |
| novel_pir186   | 348 | 0 | 11.85 | 0.001 | -13.53259944 | Down | 1.14E-79 | 8.31E-79 |
| novel_pir206   | 347 | 0 | 11.82 | 0.001 | -13.52894242 | Down | 1.92E-79 | 1.40E-78 |
| novel_pir767   | 347 | 0 | 11.82 | 0.001 | -13.52894242 | Down | 1.92E-79 | 1.39E-78 |
| novel_pir242   | 347 | 0 | 11.82 | 0.001 | -13.52894242 | Down | 1.92E-79 | 1.39E-78 |
| novel_pir724   | 346 | 0 | 11.78 | 0.001 | -13.52405192 | Down | 3.23E-79 | 2.33E-78 |

|               |     |   |       |       |              |      |          |          |
|---------------|-----|---|-------|-------|--------------|------|----------|----------|
| novel_pir1203 | 346 | 0 | 11.78 | 0.001 | -13.52405192 | Down | 3.23E-79 | 2.32E-78 |
| novel_pir243  | 346 | 0 | 11.78 | 0.001 | -13.52405192 | Down | 3.23E-79 | 2.31E-78 |
| novel_pir2107 | 345 | 0 | 11.75 | 0.001 | -13.52037314 | Down | 5.45E-79 | 3.89E-78 |
| novel_pir2168 | 344 | 0 | 11.72 | 0.001 | -13.51668495 | Down | 9.20E-79 | 6.53E-78 |
| novel_pir656  | 344 | 0 | 11.72 | 0.001 | -13.51668495 | Down | 9.20E-79 | 6.51E-78 |
| novel_pir1135 | 343 | 0 | 11.68 | 0.001 | -13.51175265 | Down | 1.55E-78 | 1.09E-77 |
| novel_pir283  | 343 | 0 | 11.68 | 0.001 | -13.51175265 | Down | 1.55E-78 | 1.09E-77 |
| novel_pir102  | 342 | 0 | 11.65 | 0.001 | -13.50804233 | Down | 2.62E-78 | 1.83E-77 |
| novel_pir910  | 342 | 0 | 11.65 | 0.001 | -13.50804233 | Down | 2.62E-78 | 1.82E-77 |
| novel_pir1190 | 341 | 0 | 11.61 | 0.001 | -13.50308035 | Down | 4.41E-78 | 3.06E-77 |
| novel_pir655  | 341 | 0 | 11.61 | 0.001 | -13.50308035 | Down | 4.41E-78 | 3.05E-77 |
| novel_pir1644 | 341 | 0 | 11.61 | 0.001 | -13.50308035 | Down | 4.41E-78 | 3.04E-77 |
| novel_pir203  | 340 | 0 | 11.58 | 0.001 | -13.49934763 | Down | 7.45E-78 | 5.10E-77 |
| novel_pir493  | 340 | 0 | 11.58 | 0.001 | -13.49934763 | Down | 7.45E-78 | 5.08E-77 |
| novel_pir2476 | 340 | 0 | 11.58 | 0.001 | -13.49934763 | Down | 7.45E-78 | 5.07E-77 |
| novel_pir2    | 340 | 0 | 11.58 | 0.001 | -13.49934763 | Down | 7.45E-78 | 5.05E-77 |
| novel_pir489  | 340 | 0 | 11.58 | 0.001 | -13.49934763 | Down | 7.45E-78 | 5.03E-77 |
| novel_pir2080 | 339 | 0 | 11.54 | 0.001 | -13.4943556  | Down | 1.26E-77 | 8.46E-77 |
| novel_pir66   | 339 | 0 | 11.54 | 0.001 | -13.4943556  | Down | 1.26E-77 | 8.43E-77 |
| novel_pir1296 | 339 | 0 | 11.54 | 0.001 | -13.4943556  | Down | 1.26E-77 | 8.40E-77 |
| novel_pir567  | 339 | 0 | 11.54 | 0.001 | -13.4943556  | Down | 1.26E-77 | 8.37E-77 |
| novel_pir2219 | 339 | 0 | 11.54 | 0.001 | -13.4943556  | Down | 1.26E-77 | 8.34E-77 |
| novel_pir1066 | 338 | 0 | 11.51 | 0.001 | -13.49060021 | Down | 2.12E-77 | 1.40E-76 |
| novel_pir995  | 338 | 0 | 11.51 | 0.001 | -13.49060021 | Down | 2.12E-77 | 1.40E-76 |
| novel_pir1080 | 338 | 0 | 11.51 | 0.001 | -13.49060021 | Down | 2.12E-77 | 1.39E-76 |
| novel_pir260  | 337 | 0 | 11.48 | 0.001 | -13.48683502 | Down | 3.57E-77 | 2.34E-76 |
| novel_pir949  | 336 | 0 | 11.44 | 0.001 | -13.48179943 | Down | 6.03E-77 | 3.93E-76 |
| novel_pir596  | 336 | 0 | 11.44 | 0.001 | -13.48179943 | Down | 6.03E-77 | 3.92E-76 |
| novel_pir940  | 336 | 0 | 11.44 | 0.001 | -13.48179943 | Down | 6.03E-77 | 3.91E-76 |
| novel_pir1140 | 335 | 0 | 11.41 | 0.001 | -13.47801117 | Down | 1.02E-76 | 6.57E-76 |
| novel_pir2103 | 335 | 0 | 11.41 | 0.001 | -13.47801117 | Down | 1.02E-76 | 6.55E-76 |
| novel_pir1629 | 335 | 0 | 11.41 | 0.001 | -13.47801117 | Down | 1.02E-76 | 6.53E-76 |
| novel_pir485  | 334 | 0 | 11.37 | 0.001 | -13.47294463 | Down | 1.72E-76 | 1.10E-75 |
| novel_pir1432 | 334 | 0 | 11.37 | 0.001 | -13.47294463 | Down | 1.72E-76 | 1.09E-75 |
| novel_pir1611 | 333 | 0 | 11.34 | 0.001 | -13.46913302 | Down | 2.89E-76 | 1.84E-75 |
| novel_pir1730 | 333 | 0 | 11.34 | 0.001 | -13.46913302 | Down | 2.89E-76 | 1.83E-75 |

|               |     |   |       |       |              |      |          |          |
|---------------|-----|---|-------|-------|--------------|------|----------|----------|
| novel_pir2195 | 331 | 0 | 11.27 | 0.001 | -13.4601999  | Down | 8.23E-76 | 5.18E-75 |
| novel_pir1231 | 330 | 0 | 11.24 | 0.001 | -13.45635442 | Down | 1.39E-75 | 8.68E-75 |
| novel_pir1079 | 330 | 0 | 11.24 | 0.001 | -13.45635442 | Down | 1.39E-75 | 8.65E-75 |
| novel_pir1874 | 330 | 0 | 11.24 | 0.001 | -13.45635442 | Down | 1.39E-75 | 8.63E-75 |
| novel_pir1385 | 329 | 0 | 11.2  | 0.001 | -13.45121111 | Down | 2.34E-75 | 1.45E-74 |
| novel_pir74   | 328 | 0 | 11.17 | 0.001 | -13.44734157 | Down | 3.95E-75 | 2.44E-74 |
| novel_pir2224 | 328 | 0 | 11.17 | 0.001 | -13.44734157 | Down | 3.95E-75 | 2.43E-74 |
| novel_pir1958 | 328 | 0 | 11.17 | 0.001 | -13.44734157 | Down | 3.95E-75 | 2.42E-74 |
| novel_pir1459 | 328 | 0 | 11.17 | 0.001 | -13.44734157 | Down | 3.95E-75 | 2.42E-74 |
| novel_pir51   | 327 | 0 | 11.14 | 0.001 | -13.44346161 | Down | 6.66E-75 | 4.06E-74 |
| novel_pir2227 | 326 | 0 | 11.1  | 0.001 | -13.43827206 | Down | 1.12E-74 | 6.83E-74 |
| novel_pir1979 | 326 | 0 | 11.1  | 0.001 | -13.43827206 | Down | 1.12E-74 | 6.81E-74 |
| novel_pir2266 | 325 | 0 | 11.07 | 0.001 | -13.4343676  | Down | 1.90E-74 | 1.14E-73 |
| novel_pir69   | 325 | 0 | 11.07 | 0.001 | -13.4343676  | Down | 1.90E-74 | 1.14E-73 |
| novel_pir211  | 325 | 0 | 11.07 | 0.001 | -13.4343676  | Down | 1.90E-74 | 1.13E-73 |
| novel_pir180  | 325 | 0 | 11.07 | 0.001 | -13.4343676  | Down | 1.90E-74 | 1.13E-73 |
| novel_pir2220 | 325 | 0 | 11.07 | 0.001 | -13.4343676  | Down | 1.90E-74 | 1.13E-73 |
| novel_pir1323 | 323 | 0 | 11    | 0.001 | -13.4252159  | Down | 5.40E-74 | 3.20E-73 |
| novel_pir973  | 323 | 0 | 11    | 0.001 | -13.4252159  | Down | 5.40E-74 | 3.19E-73 |
| novel_pir2260 | 323 | 0 | 11    | 0.001 | -13.4252159  | Down | 5.40E-74 | 3.18E-73 |
| novel_pir1794 | 322 | 0 | 10.97 | 0.001 | -13.42127591 | Down | 9.10E-74 | 5.34E-73 |
| novel_pir1993 | 321 | 0 | 10.93 | 0.001 | -13.41600578 | Down | 1.54E-73 | 8.99E-73 |
| novel_pir577  | 319 | 0 | 10.86 | 0.001 | -13.40673648 | Down | 4.37E-73 | 2.55E-72 |
| novel_pir1389 | 318 | 0 | 10.83 | 0.001 | -13.40274562 | Down | 7.37E-73 | 4.29E-72 |
| novel_pir1904 | 316 | 0 | 10.76 | 0.001 | -13.39339046 | Down | 2.10E-72 | 1.22E-71 |
| novel_pir1373 | 316 | 0 | 10.76 | 0.001 | -13.39339046 | Down | 2.10E-72 | 1.21E-71 |
| novel_pir2292 | 315 | 0 | 10.73 | 0.001 | -13.38936246 | Down | 3.54E-72 | 2.04E-71 |
| novel_pir389  | 315 | 0 | 10.73 | 0.001 | -13.38936246 | Down | 3.54E-72 | 2.03E-71 |
| novel_pir1443 | 315 | 0 | 10.73 | 0.001 | -13.38936246 | Down | 3.54E-72 | 2.03E-71 |
| novel_pir720  | 315 | 0 | 10.73 | 0.001 | -13.38936246 | Down | 3.54E-72 | 2.02E-71 |
| novel_pir1277 | 315 | 0 | 10.73 | 0.001 | -13.38936246 | Down | 3.54E-72 | 2.02E-71 |
| novel_pir175  | 315 | 0 | 10.73 | 0.001 | -13.38936246 | Down | 3.54E-72 | 2.01E-71 |
| novel_pir2273 | 314 | 0 | 10.69 | 0.001 | -13.38397423 | Down | 5.97E-72 | 3.38E-71 |
| novel_pir1490 | 313 | 0 | 10.66 | 0.001 | -13.37991982 | Down | 1.01E-71 | 5.68E-71 |
| novel_pir2357 | 313 | 0 | 10.66 | 0.001 | -13.37991982 | Down | 1.01E-71 | 5.67E-71 |
| novel_pir1918 | 312 | 0 | 10.63 | 0.001 | -13.37585398 | Down | 1.70E-71 | 9.53E-71 |

|               |     |   |       |       |              |      |          |          |
|---------------|-----|---|-------|-------|--------------|------|----------|----------|
| novel_pir721  | 311 | 0 | 10.59 | 0.001 | -13.37041497 | Down | 2.86E-71 | 1.60E-70 |
| novel_pir1151 | 310 | 0 | 10.56 | 0.001 | -13.36632221 | Down | 4.83E-71 | 2.70E-70 |
| novel_pir535  | 309 | 0 | 10.52 | 0.001 | -13.36084708 | Down | 8.15E-71 | 4.54E-70 |
| novel_pir579  | 309 | 0 | 10.52 | 0.001 | -13.36084708 | Down | 8.15E-71 | 4.52E-70 |
| novel_pir627  | 309 | 0 | 10.52 | 0.001 | -13.36084708 | Down | 8.15E-71 | 4.51E-70 |
| novel_pir1440 | 309 | 0 | 10.52 | 0.001 | -13.36084708 | Down | 8.15E-71 | 4.50E-70 |
| novel_pir1392 | 309 | 0 | 10.52 | 0.001 | -13.36084708 | Down | 8.15E-71 | 4.48E-70 |
| novel_pir525  | 309 | 0 | 10.52 | 0.001 | -13.36084708 | Down | 8.15E-71 | 4.47E-70 |
| novel_pir1526 | 307 | 0 | 10.45 | 0.001 | -13.35121532 | Down | 2.32E-70 | 1.26E-69 |
| novel_pir1974 | 307 | 0 | 10.45 | 0.001 | -13.35121532 | Down | 2.32E-70 | 1.26E-69 |
| novel_pir1366 | 306 | 0 | 10.42 | 0.001 | -13.34706766 | Down | 3.91E-70 | 2.12E-69 |
| novel_pir635  | 306 | 0 | 10.42 | 0.001 | -13.34706766 | Down | 3.91E-70 | 2.12E-69 |
| novel_pir1718 | 306 | 0 | 10.42 | 0.001 | -13.34706766 | Down | 3.91E-70 | 2.11E-69 |
| novel_pir1564 | 305 | 0 | 10.39 | 0.001 | -13.34290803 | Down | 6.59E-70 | 3.55E-69 |
| novel_pir950  | 305 | 0 | 10.39 | 0.001 | -13.34290803 | Down | 6.59E-70 | 3.54E-69 |
| novel_pir1739 | 305 | 0 | 10.39 | 0.001 | -13.34290803 | Down | 6.59E-70 | 3.53E-69 |
| novel_pir1029 | 304 | 0 | 10.35 | 0.001 | -13.33734315 | Down | 1.11E-69 | 5.94E-69 |
| novel_pir2233 | 304 | 0 | 10.35 | 0.001 | -13.33734315 | Down | 1.11E-69 | 5.92E-69 |
| novel_pir1335 | 304 | 0 | 10.35 | 0.001 | -13.33734315 | Down | 1.11E-69 | 5.90E-69 |
| novel_pir1445 | 303 | 0 | 10.32 | 0.001 | -13.33315535 | Down | 1.88E-69 | 9.93E-69 |
| novel_pir140  | 303 | 0 | 10.32 | 0.001 | -13.33315535 | Down | 1.88E-69 | 9.91E-69 |
| novel_pir1950 | 303 | 0 | 10.32 | 0.001 | -13.33315535 | Down | 1.88E-69 | 9.88E-69 |
| novel_pir2043 | 302 | 0 | 10.28 | 0.001 | -13.32755264 | Down | 3.17E-69 | 1.66E-68 |
| novel_pir38   | 302 | 0 | 10.28 | 0.001 | -13.32755264 | Down | 3.17E-69 | 1.66E-68 |
| novel_pir563  | 301 | 0 | 10.25 | 0.001 | -13.32333629 | Down | 5.34E-69 | 2.78E-68 |
| novel_pir303  | 301 | 0 | 10.25 | 0.001 | -13.32333629 | Down | 5.34E-69 | 2.77E-68 |
| novel_pir2181 | 301 | 0 | 10.25 | 0.001 | -13.32333629 | Down | 5.34E-69 | 2.77E-68 |
| novel_pir875  | 301 | 0 | 10.25 | 0.001 | -13.32333629 | Down | 5.34E-69 | 2.76E-68 |
| novel_pir882  | 301 | 0 | 10.25 | 0.001 | -13.32333629 | Down | 5.34E-69 | 2.75E-68 |
| novel_pir784  | 301 | 0 | 10.25 | 0.001 | -13.32333629 | Down | 5.34E-69 | 2.74E-68 |
| novel_pir1006 | 300 | 0 | 10.22 | 0.001 | -13.31910758 | Down | 9.01E-69 | 4.62E-68 |
| novel_pir1002 | 300 | 0 | 10.22 | 0.001 | -13.31910758 | Down | 9.01E-69 | 4.60E-68 |
| novel_pir1152 | 299 | 0 | 10.18 | 0.001 | -13.31344994 | Down | 1.52E-68 | 7.74E-68 |
| novel_pir1910 | 299 | 0 | 10.18 | 0.001 | -13.31344994 | Down | 1.52E-68 | 7.72E-68 |
| novel_pir546  | 298 | 0 | 10.15 | 0.001 | -13.30919211 | Down | 2.56E-68 | 1.30E-67 |
| novel_pir207  | 298 | 0 | 10.15 | 0.001 | -13.30919211 | Down | 2.56E-68 | 1.30E-67 |

|               |     |   |       |       |              |      |          |          |
|---------------|-----|---|-------|-------|--------------|------|----------|----------|
| novel_pir121  | 298 | 0 | 10.15 | 0.001 | -13.30919211 | Down | 2.56E-68 | 1.29E-67 |
| novel_pir1932 | 296 | 0 | 10.08 | 0.001 | -13.29920802 | Down | 7.29E-68 | 3.67E-67 |
| novel_pir1234 | 296 | 0 | 10.08 | 0.001 | -13.29920802 | Down | 7.29E-68 | 3.66E-67 |
| novel_pir76   | 295 | 0 | 10.05 | 0.001 | -13.29490788 | Down | 1.23E-67 | 6.16E-67 |
| novel_pir1605 | 295 | 0 | 10.05 | 0.001 | -13.29490788 | Down | 1.23E-67 | 6.14E-67 |
| novel_pir860  | 294 | 0 | 10.01 | 0.001 | -13.28915435 | Down | 2.07E-67 | 1.03E-66 |
| novel_pir1826 | 294 | 0 | 10.01 | 0.001 | -13.28915435 | Down | 2.07E-67 | 1.03E-66 |
| novel_pir2474 | 294 | 0 | 10.01 | 0.001 | -13.28915435 | Down | 2.07E-67 | 1.03E-66 |
| novel_pir387  | 293 | 0 | 9.98  | 0.001 | -13.2848241  | Down | 3.50E-67 | 1.72E-66 |
| novel_pir694  | 293 | 0 | 9.98  | 0.001 | -13.2848241  | Down | 3.50E-67 | 1.72E-66 |
| novel_pir832  | 292 | 0 | 9.94  | 0.001 | -13.27903014 | Down | 5.90E-67 | 2.89E-66 |
| novel_pir1408 | 292 | 0 | 9.94  | 0.001 | -13.27903014 | Down | 5.90E-67 | 2.89E-66 |
| novel_pir2210 | 292 | 0 | 9.94  | 0.001 | -13.27903014 | Down | 5.90E-67 | 2.88E-66 |
| novel_pir1072 | 292 | 0 | 9.94  | 0.001 | -13.27903014 | Down | 5.90E-67 | 2.87E-66 |
| novel_pir1922 | 291 | 0 | 9.91  | 0.001 | -13.27466934 | Down | 9.96E-67 | 4.83E-66 |
| novel_pir1603 | 291 | 0 | 9.91  | 0.001 | -13.27466934 | Down | 9.96E-67 | 4.82E-66 |
| novel_pir190  | 291 | 0 | 9.91  | 0.001 | -13.27466934 | Down | 9.96E-67 | 4.81E-66 |
| novel_pir1894 | 290 | 0 | 9.88  | 0.001 | -13.27029533 | Down | 1.68E-66 | 8.09E-66 |
| novel_pir368  | 289 | 0 | 9.84  | 0.001 | -13.2644426  | Down | 2.83E-66 | 1.36E-65 |
| novel_pir1037 | 288 | 0 | 9.81  | 0.001 | -13.26003742 | Down | 4.78E-66 | 2.29E-65 |
| novel_pir978  | 288 | 0 | 9.81  | 0.001 | -13.26003742 | Down | 4.78E-66 | 2.29E-65 |
| novel_pir1502 | 288 | 0 | 9.81  | 0.001 | -13.26003742 | Down | 4.78E-66 | 2.28E-65 |
| novel_pir2390 | 287 | 0 | 9.77  | 0.001 | -13.25414285 | Down | 8.06E-66 | 3.84E-65 |
| novel_pir483  | 287 | 0 | 9.77  | 0.001 | -13.25414285 | Down | 8.06E-66 | 3.83E-65 |
| novel_pir2153 | 287 | 0 | 9.77  | 0.001 | -13.25414285 | Down | 8.06E-66 | 3.82E-65 |
| novel_pir779  | 287 | 0 | 9.77  | 0.001 | -13.25414285 | Down | 8.06E-66 | 3.81E-65 |
| novel_pir541  | 286 | 0 | 9.74  | 0.001 | -13.24970606 | Down | 1.36E-65 | 6.41E-65 |
| novel_pir2197 | 285 | 0 | 9.71  | 0.001 | -13.24525558 | Down | 2.29E-65 | 1.08E-64 |
| novel_pir1853 | 285 | 0 | 9.71  | 0.001 | -13.24525558 | Down | 2.29E-65 | 1.08E-64 |
| novel_pir2050 | 285 | 0 | 9.71  | 0.001 | -13.24525558 | Down | 2.29E-65 | 1.07E-64 |
| novel_pir2441 | 284 | 0 | 9.67  | 0.001 | -13.23930017 | Down | 3.87E-65 | 1.81E-64 |
| novel_pir1965 | 284 | 0 | 9.67  | 0.001 | -13.23930017 | Down | 3.87E-65 | 1.80E-64 |
| novel_pir1173 | 284 | 0 | 9.67  | 0.001 | -13.23930017 | Down | 3.87E-65 | 1.80E-64 |
| novel_pir557  | 284 | 0 | 9.67  | 0.001 | -13.23930017 | Down | 3.87E-65 | 1.79E-64 |
| novel_pir630  | 284 | 0 | 9.67  | 0.001 | -13.23930017 | Down | 3.87E-65 | 1.79E-64 |
| novel_pir281  | 284 | 0 | 9.67  | 0.001 | -13.23930017 | Down | 3.87E-65 | 1.78E-64 |

|               |     |   |      |       |              |      |          |          |
|---------------|-----|---|------|-------|--------------|------|----------|----------|
| novel_pirl745 | 283 | 0 | 9.64 | 0.001 | -13.23481743 | Down | 6.53E-65 | 2.99E-64 |
| novel_pir805  | 283 | 0 | 9.64 | 0.001 | -13.23481743 | Down | 6.53E-65 | 2.99E-64 |
| novel_pirl855 | 283 | 0 | 9.64 | 0.001 | -13.23481743 | Down | 6.53E-65 | 2.98E-64 |
| novel_pir460  | 282 | 0 | 9.6  | 0.001 | -13.22881869 | Down | 1.10E-64 | 5.00E-64 |
| novel_pir702  | 281 | 0 | 9.57 | 0.001 | -13.22430321 | Down | 1.86E-64 | 8.42E-64 |
| novel_pirl971 | 281 | 0 | 9.57 | 0.001 | -13.22430321 | Down | 1.86E-64 | 8.40E-64 |
| novel_pirl225 | 281 | 0 | 9.57 | 0.001 | -13.22430321 | Down | 1.86E-64 | 8.38E-64 |
| novel_pir497  | 281 | 0 | 9.57 | 0.001 | -13.22430321 | Down | 1.86E-64 | 8.36E-64 |
| novel_pirl508 | 280 | 0 | 9.54 | 0.001 | -13.21977355 | Down | 3.13E-64 | 1.40E-63 |
| novel_pir349  | 280 | 0 | 9.54 | 0.001 | -13.21977355 | Down | 3.13E-64 | 1.40E-63 |
| novel_pirl83  | 280 | 0 | 9.54 | 0.001 | -13.21977355 | Down | 3.13E-64 | 1.40E-63 |
| novel_pir722  | 279 | 0 | 9.5  | 0.001 | -13.2137118  | Down | 5.28E-64 | 2.35E-63 |
| novel_pirl129 | 279 | 0 | 9.5  | 0.001 | -13.2137118  | Down | 5.28E-64 | 2.34E-63 |
| novel_pirl194 | 279 | 0 | 9.5  | 0.001 | -13.2137118  | Down | 5.28E-64 | 2.34E-63 |
| novel_pir866  | 278 | 0 | 9.47 | 0.001 | -13.20914871 | Down | 8.91E-64 | 3.93E-63 |
| novel_pir580  | 278 | 0 | 9.47 | 0.001 | -13.20914871 | Down | 8.91E-64 | 3.92E-63 |
| novel_pirl400 | 277 | 0 | 9.43 | 0.001 | -13.20304206 | Down | 1.50E-63 | 6.60E-63 |
| novel_pirl086 | 277 | 0 | 9.43 | 0.001 | -13.20304206 | Down | 1.50E-63 | 6.59E-63 |
| novel_pirl986 | 277 | 0 | 9.43 | 0.001 | -13.20304206 | Down | 1.50E-63 | 6.57E-63 |
| novel_pirl786 | 276 | 0 | 9.4  | 0.001 | -13.19844504 | Down | 2.54E-63 | 1.11E-62 |
| novel_pirl377 | 276 | 0 | 9.4  | 0.001 | -13.19844504 | Down | 2.54E-63 | 1.10E-62 |
| novel_pirl87  | 275 | 0 | 9.37 | 0.001 | -13.19383333 | Down | 4.28E-63 | 1.86E-62 |
| novel_pir990  | 275 | 0 | 9.37 | 0.001 | -13.19383333 | Down | 4.28E-63 | 1.85E-62 |
| novel_pirl238 | 275 | 0 | 9.37 | 0.001 | -13.19383333 | Down | 4.28E-63 | 1.85E-62 |
| novel_pir2383 | 274 | 0 | 9.33 | 0.001 | -13.18766137 | Down | 7.21E-63 | 3.11E-62 |
| novel_pir97   | 274 | 0 | 9.33 | 0.001 | -13.18766137 | Down | 7.21E-63 | 3.10E-62 |
| novel_pir2363 | 273 | 0 | 9.3  | 0.001 | -13.183015   | Down | 1.22E-62 | 5.21E-62 |
| novel_pirl749 | 273 | 0 | 9.3  | 0.001 | -13.183015   | Down | 1.22E-62 | 5.20E-62 |
| novel_pir2137 | 272 | 0 | 9.26 | 0.001 | -13.17679648 | Down | 2.05E-62 | 8.75E-62 |
| novel_pir502  | 271 | 0 | 9.23 | 0.001 | -13.17211493 | Down | 3.46E-62 | 1.47E-61 |
| novel_pir98   | 271 | 0 | 9.23 | 0.001 | -13.17211493 | Down | 3.46E-62 | 1.47E-61 |
| novel_pirl336 | 270 | 0 | 9.19 | 0.001 | -13.16584915 | Down | 5.84E-62 | 2.47E-61 |
| novel_pir337  | 269 | 0 | 9.16 | 0.001 | -13.16113188 | Down | 9.85E-62 | 4.17E-61 |
| novel_pirl156 | 269 | 0 | 9.16 | 0.001 | -13.16113188 | Down | 9.85E-62 | 4.16E-61 |
| novel_pirl302 | 268 | 0 | 9.13 | 0.001 | -13.15639914 | Down | 1.66E-61 | 7.00E-61 |
| novel_pir754  | 268 | 0 | 9.13 | 0.001 | -13.15639914 | Down | 1.66E-61 | 6.98E-61 |

|               |     |   |      |       |              |      |          |          |
|---------------|-----|---|------|-------|--------------|------|----------|----------|
| novel_pirl715 | 268 | 0 | 9.13 | 0.001 | -13.15639914 | Down | 1.66E-61 | 6.96E-61 |
| novel_pir981  | 267 | 0 | 9.09 | 0.001 | -13.15006458 | Down | 2.80E-61 | 1.17E-60 |
| novel_pirl890 | 267 | 0 | 9.09 | 0.001 | -13.15006458 | Down | 2.80E-61 | 1.17E-60 |
| novel_pirl500 | 267 | 0 | 9.09 | 0.001 | -13.15006458 | Down | 2.80E-61 | 1.17E-60 |
| novel_pirl787 | 266 | 0 | 9.06 | 0.001 | -13.14529533 | Down | 4.73E-61 | 1.96E-60 |
| novel_pir48   | 266 | 0 | 9.06 | 0.001 | -13.14529533 | Down | 4.73E-61 | 1.96E-60 |
| novel_pir408  | 265 | 0 | 9.02 | 0.001 | -13.13891172 | Down | 7.98E-61 | 3.30E-60 |
| novel_pirl883 | 264 | 0 | 8.99 | 0.001 | -13.1341054  | Down | 1.35E-60 | 5.54E-60 |
| novel_pirl429 | 264 | 0 | 8.99 | 0.001 | -13.1341054  | Down | 1.35E-60 | 5.53E-60 |
| novel_pir9    | 263 | 0 | 8.96 | 0.001 | -13.12928302 | Down | 2.27E-60 | 9.31E-60 |
| novel_pirl681 | 263 | 0 | 8.96 | 0.001 | -13.12928302 | Down | 2.27E-60 | 9.29E-60 |
| novel_pirl992 | 262 | 0 | 8.92 | 0.001 | -13.12282799 | Down | 3.83E-60 | 1.56E-59 |
| novel_pir2243 | 262 | 0 | 8.92 | 0.001 | -13.12282799 | Down | 3.83E-60 | 1.56E-59 |
| novel_pirl153 | 261 | 0 | 8.89 | 0.001 | -13.1179677  | Down | 6.46E-60 | 2.62E-59 |
| novel_pir2216 | 261 | 0 | 8.89 | 0.001 | -13.1179677  | Down | 6.46E-60 | 2.62E-59 |
| novel_pirl848 | 261 | 0 | 8.89 | 0.001 | -13.1179677  | Down | 6.46E-60 | 2.61E-59 |
| novel_pir971  | 261 | 0 | 8.89 | 0.001 | -13.1179677  | Down | 6.46E-60 | 2.60E-59 |
| novel_pirl829 | 261 | 0 | 8.89 | 0.001 | -13.1179677  | Down | 6.46E-60 | 2.60E-59 |
| novel_pir2078 | 261 | 0 | 8.89 | 0.001 | -13.1179677  | Down | 6.46E-60 | 2.59E-59 |
| novel_pirl845 | 261 | 0 | 8.89 | 0.001 | -13.1179677  | Down | 6.46E-60 | 2.59E-59 |
| novel_pir293  | 260 | 0 | 8.85 | 0.001 | -13.11146174 | Down | 1.09E-59 | 4.36E-59 |
| novel_pirl391 | 259 | 0 | 8.82 | 0.001 | -13.10656294 | Down | 1.84E-59 | 7.33E-59 |
| novel_pir2305 | 259 | 0 | 8.82 | 0.001 | -13.10656294 | Down | 1.84E-59 | 7.32E-59 |
| novel_pirl105 | 259 | 0 | 8.82 | 0.001 | -13.10656294 | Down | 1.84E-59 | 7.30E-59 |
| novel_pirl425 | 259 | 0 | 8.82 | 0.001 | -13.10656294 | Down | 1.84E-59 | 7.29E-59 |
| novel_pir801  | 259 | 0 | 8.82 | 0.001 | -13.10656294 | Down | 1.84E-59 | 7.27E-59 |
| novel_pir2302 | 259 | 0 | 8.82 | 0.001 | -13.10656294 | Down | 1.84E-59 | 7.26E-59 |
| novel_pirl009 | 258 | 0 | 8.79 | 0.001 | -13.10164745 | Down | 3.10E-59 | 1.22E-58 |
| novel_pirl209 | 257 | 0 | 8.75 | 0.001 | -13.0950673  | Down | 5.23E-59 | 2.05E-58 |
| novel_pir892  | 257 | 0 | 8.75 | 0.001 | -13.0950673  | Down | 5.23E-59 | 2.05E-58 |
| novel_pirl310 | 257 | 0 | 8.75 | 0.001 | -13.0950673  | Down | 5.23E-59 | 2.04E-58 |
| novel_pirl041 | 257 | 0 | 8.75 | 0.001 | -13.0950673  | Down | 5.23E-59 | 2.04E-58 |
| novel_pirl348 | 256 | 0 | 8.72 | 0.001 | -13.09011242 | Down | 8.82E-59 | 3.43E-58 |
| novel_pirl822 | 256 | 0 | 8.72 | 0.001 | -13.09011242 | Down | 8.82E-59 | 3.43E-58 |
| novel_pirl339 | 256 | 0 | 8.72 | 0.001 | -13.09011242 | Down | 8.82E-59 | 3.42E-58 |
| novel_pirl753 | 255 | 0 | 8.68 | 0.001 | -13.08347933 | Down | 1.49E-58 | 5.76E-58 |



|               |     |   |      |       |              |      |          |          |
|---------------|-----|---|------|-------|--------------|------|----------|----------|
| novel_pir2212 | 255 | 0 | 8.68 | 0.001 | -13.08347933 | Down | 1.49E-58 | 5.75E-58 |
| novel_pir1126 | 254 | 0 | 8.65 | 0.001 | -13.07848442 | Down | 2.51E-58 | 9.68E-58 |
| novel_pir1882 | 253 | 0 | 8.62 | 0.001 | -13.07347215 | Down | 4.23E-58 | 1.63E-57 |
| novel_pir947  | 253 | 0 | 8.62 | 0.001 | -13.07347215 | Down | 4.23E-58 | 1.62E-57 |
| novel_pir1420 | 252 | 0 | 8.58 | 0.001 | -13.06676193 | Down | 7.14E-58 | 2.73E-57 |
| novel_pir1096 | 251 | 0 | 8.55 | 0.001 | -13.0617087  | Down | 1.20E-57 | 4.60E-57 |
| novel_pir122  | 251 | 0 | 8.55 | 0.001 | -13.0617087  | Down | 1.20E-57 | 4.59E-57 |
| novel_pir8    | 251 | 0 | 8.55 | 0.001 | -13.0617087  | Down | 1.20E-57 | 4.58E-57 |
| novel_pir1035 | 250 | 0 | 8.51 | 0.001 | -13.05494342 | Down | 2.03E-57 | 7.71E-57 |
| novel_pir1534 | 250 | 0 | 8.51 | 0.001 | -13.05494342 | Down | 2.03E-57 | 7.69E-57 |
| novel_pir584  | 250 | 0 | 8.51 | 0.001 | -13.05494342 | Down | 2.03E-57 | 7.68E-57 |
| novel_pir2253 | 249 | 0 | 8.48 | 0.001 | -13.04984855 | Down | 3.43E-57 | 1.29E-56 |
| novel_pir2229 | 249 | 0 | 8.48 | 0.001 | -13.04984855 | Down | 3.43E-57 | 1.29E-56 |
| novel_pir1248 | 249 | 0 | 8.48 | 0.001 | -13.04984855 | Down | 3.43E-57 | 1.29E-56 |
| novel_pir855  | 249 | 0 | 8.48 | 0.001 | -13.04984855 | Down | 3.43E-57 | 1.29E-56 |
| novel_pir2118 | 249 | 0 | 8.48 | 0.001 | -13.04984855 | Down | 3.43E-57 | 1.28E-56 |
| novel_pir1095 | 248 | 0 | 8.45 | 0.001 | -13.04473563 | Down | 5.78E-57 | 2.16E-56 |
| novel_pir135  | 248 | 0 | 8.45 | 0.001 | -13.04473563 | Down | 5.78E-57 | 2.16E-56 |
| novel_pir1128 | 248 | 0 | 8.45 | 0.001 | -13.04473563 | Down | 5.78E-57 | 2.15E-56 |
| novel_pir1800 | 248 | 0 | 8.45 | 0.001 | -13.04473563 | Down | 5.78E-57 | 2.15E-56 |
| novel_pir2372 | 247 | 0 | 8.41 | 0.001 | -13.03789009 | Down | 9.75E-57 | 3.62E-56 |
| novel_pir2111 | 247 | 0 | 8.41 | 0.001 | -13.03789009 | Down | 9.75E-57 | 3.61E-56 |
| novel_pir534  | 247 | 0 | 8.41 | 0.001 | -13.03789009 | Down | 9.75E-57 | 3.60E-56 |
| novel_pir1514 | 246 | 0 | 8.38 | 0.001 | -13.03273453 | Down | 1.64E-56 | 6.05E-56 |
| novel_pir1384 | 246 | 0 | 8.38 | 0.001 | -13.03273453 | Down | 1.64E-56 | 6.04E-56 |
| novel_pir1108 | 246 | 0 | 8.38 | 0.001 | -13.03273453 | Down | 1.64E-56 | 6.03E-56 |
| novel_pir444  | 244 | 0 | 8.31 | 0.001 | -13.02063276 | Down | 4.68E-56 | 1.71E-55 |
| novel_pir1098 | 243 | 0 | 8.28 | 0.001 | -13.01541505 | Down | 7.89E-56 | 2.88E-55 |
| novel_pir467  | 243 | 0 | 8.28 | 0.001 | -13.01541505 | Down | 7.89E-56 | 2.87E-55 |
| novel_pir1519 | 243 | 0 | 8.28 | 0.001 | -13.01541505 | Down | 7.89E-56 | 2.87E-55 |
| novel_pir12   | 243 | 0 | 8.28 | 0.001 | -13.01541505 | Down | 7.89E-56 | 2.86E-55 |
| novel_pir2165 | 243 | 0 | 8.28 | 0.001 | -13.01541505 | Down | 7.89E-56 | 2.86E-55 |
| novel_pir1092 | 242 | 0 | 8.24 | 0.001 | -13.00842862 | Down | 1.33E-55 | 4.81E-55 |
| novel_pir1662 | 241 | 0 | 8.21 | 0.001 | -13.00316651 | Down | 2.25E-55 | 8.09E-55 |
| novel_pir1416 | 241 | 0 | 8.21 | 0.001 | -13.00316651 | Down | 2.25E-55 | 8.08E-55 |
| novel_pir65   | 240 | 0 | 8.17 | 0.001 | -12.99612036 | Down | 3.79E-55 | 1.36E-54 |

|               |     |   |      |       |              |      |          |          |
|---------------|-----|---|------|-------|--------------|------|----------|----------|
| novel_pirl660 | 239 | 0 | 8.14 | 0.001 | -12.99081308 | Down | 6.39E-55 | 2.29E-54 |
| novel_pirl393 | 239 | 0 | 8.14 | 0.001 | -12.99081308 | Down | 6.39E-55 | 2.28E-54 |
| novel_pirl592 | 239 | 0 | 8.14 | 0.001 | -12.99081308 | Down | 6.39E-55 | 2.28E-54 |
| novel_pirl706 | 238 | 0 | 8.11 | 0.001 | -12.9854862  | Down | 1.08E-54 | 3.83E-54 |
| novel_pir590  | 238 | 0 | 8.11 | 0.001 | -12.9854862  | Down | 1.08E-54 | 3.82E-54 |
| novel_pirl770 | 238 | 0 | 8.11 | 0.001 | -12.9854862  | Down | 1.08E-54 | 3.81E-54 |
| novel_pirl462 | 238 | 0 | 8.11 | 0.001 | -12.9854862  | Down | 1.08E-54 | 3.81E-54 |
| novel_pirl650 | 238 | 0 | 8.11 | 0.001 | -12.9854862  | Down | 1.08E-54 | 3.80E-54 |
| novel_pirl723 | 237 | 0 | 8.07 | 0.001 | -12.97835296 | Down | 1.82E-54 | 6.39E-54 |
| novel_pir817  | 237 | 0 | 8.07 | 0.001 | -12.97835296 | Down | 1.82E-54 | 6.37E-54 |
| novel_pir821  | 237 | 0 | 8.07 | 0.001 | -12.97835296 | Down | 1.82E-54 | 6.36E-54 |
| novel_pir559  | 236 | 0 | 8.04 | 0.001 | -12.97297979 | Down | 3.07E-54 | 1.07E-53 |
| novel_pir2084 | 235 | 0 | 8    | 0.001 | -12.96578428 | Down | 5.17E-54 | 1.80E-53 |
| novel_pir464  | 235 | 0 | 8    | 0.001 | -12.96578428 | Down | 5.17E-54 | 1.80E-53 |
| novel_pirl430 | 235 | 0 | 8    | 0.001 | -12.96578428 | Down | 5.17E-54 | 1.80E-53 |
| novel_pirl019 | 234 | 0 | 7.97 | 0.001 | -12.96036401 | Down | 8.73E-54 | 3.02E-53 |
| novel_pirl978 | 233 | 0 | 7.93 | 0.001 | -12.95310515 | Down | 1.47E-53 | 5.09E-53 |
| novel_pir639  | 233 | 0 | 7.93 | 0.001 | -12.95310515 | Down | 1.47E-53 | 5.08E-53 |
| novel_pir658  | 233 | 0 | 7.93 | 0.001 | -12.95310515 | Down | 1.47E-53 | 5.07E-53 |
| novel_pir2236 | 233 | 0 | 7.93 | 0.001 | -12.95310515 | Down | 1.47E-53 | 5.06E-53 |
| novel_pir246  | 232 | 0 | 7.9  | 0.001 | -12.94763694 | Down | 2.48E-53 | 8.50E-53 |
| novel_pir2283 | 232 | 0 | 7.9  | 0.001 | -12.94763694 | Down | 2.48E-53 | 8.49E-53 |
| novel_pir576  | 232 | 0 | 7.9  | 0.001 | -12.94763694 | Down | 2.48E-53 | 8.47E-53 |
| novel_pir915  | 231 | 0 | 7.87 | 0.001 | -12.94214792 | Down | 4.19E-53 | 1.42E-52 |
| novel_pir859  | 231 | 0 | 7.87 | 0.001 | -12.94214792 | Down | 4.19E-53 | 1.42E-52 |
| novel_pirl533 | 230 | 0 | 7.83 | 0.001 | -12.93479659 | Down | 7.06E-53 | 2.39E-52 |
| novel_pir549  | 230 | 0 | 7.83 | 0.001 | -12.93479659 | Down | 7.06E-53 | 2.39E-52 |
| novel_pir249  | 229 | 0 | 7.8  | 0.001 | -12.92925841 | Down | 1.19E-52 | 4.02E-52 |
| novel_pir250  | 229 | 0 | 7.8  | 0.001 | -12.92925841 | Down | 1.19E-52 | 4.01E-52 |
| novel_pir822  | 229 | 0 | 7.8  | 0.001 | -12.92925841 | Down | 1.19E-52 | 4.00E-52 |
| novel_pirl09  | 229 | 0 | 7.8  | 0.001 | -12.92925841 | Down | 1.19E-52 | 4.00E-52 |
| novel_pir496  | 229 | 0 | 7.8  | 0.001 | -12.92925841 | Down | 1.19E-52 | 3.99E-52 |
| novel_pir629  | 228 | 0 | 7.76 | 0.001 | -12.92184094 | Down | 2.01E-52 | 6.72E-52 |
| novel_pir327  | 228 | 0 | 7.76 | 0.001 | -12.92184094 | Down | 2.01E-52 | 6.71E-52 |
| novel_pirl870 | 228 | 0 | 7.76 | 0.001 | -12.92184094 | Down | 2.01E-52 | 6.70E-52 |
| novel_pirl060 | 228 | 0 | 7.76 | 0.001 | -12.92184094 | Down | 2.01E-52 | 6.68E-52 |

|               |     |   |      |       |              |      |          |          |
|---------------|-----|---|------|-------|--------------|------|----------|----------|
| novel_pir1593 | 227 | 0 | 7.73 | 0.001 | -12.9162527  | Down | 3.39E-52 | 1.12E-51 |
| novel_pir607  | 227 | 0 | 7.73 | 0.001 | -12.9162527  | Down | 3.39E-52 | 1.12E-51 |
| novel_pir1558 | 226 | 0 | 7.7  | 0.001 | -12.91064273 | Down | 5.72E-52 | 1.89E-51 |
| novel_pir46   | 226 | 0 | 7.7  | 0.001 | -12.91064273 | Down | 5.72E-52 | 1.88E-51 |
| novel_pir55   | 225 | 0 | 7.66 | 0.001 | -12.90312868 | Down | 9.65E-52 | 3.17E-51 |
| novel_pir835  | 225 | 0 | 7.66 | 0.001 | -12.90312868 | Down | 9.65E-52 | 3.16E-51 |
| novel_pir1793 | 225 | 0 | 7.66 | 0.001 | -12.90312868 | Down | 9.65E-52 | 3.16E-51 |
| novel_pir2144 | 224 | 0 | 7.63 | 0.001 | -12.89746734 | Down | 1.63E-51 | 5.31E-51 |
| novel_pir729  | 224 | 0 | 7.63 | 0.001 | -12.89746734 | Down | 1.63E-51 | 5.30E-51 |
| novel_pir35   | 224 | 0 | 7.63 | 0.001 | -12.89746734 | Down | 1.63E-51 | 5.29E-51 |
| novel_pir1312 | 223 | 0 | 7.59 | 0.001 | -12.88988417 | Down | 2.74E-51 | 8.91E-51 |
| novel_pir1278 | 222 | 0 | 7.56 | 0.001 | -12.88417052 | Down | 4.63E-51 | 1.50E-50 |
| novel_pir1259 | 222 | 0 | 7.56 | 0.001 | -12.88417052 | Down | 4.63E-51 | 1.50E-50 |
| novel_pir941  | 222 | 0 | 7.56 | 0.001 | -12.88417052 | Down | 4.63E-51 | 1.50E-50 |
| novel_pir2469 | 222 | 0 | 7.56 | 0.001 | -12.88417052 | Down | 4.63E-51 | 1.49E-50 |
| novel_pir1468 | 221 | 0 | 7.53 | 0.001 | -12.87843415 | Down | 7.81E-51 | 2.51E-50 |
| novel_pir1293 | 221 | 0 | 7.53 | 0.001 | -12.87843415 | Down | 7.81E-51 | 2.51E-50 |
| novel_pir2239 | 221 | 0 | 7.53 | 0.001 | -12.87843415 | Down | 7.81E-51 | 2.51E-50 |
| novel_pir919  | 221 | 0 | 7.53 | 0.001 | -12.87843415 | Down | 7.81E-51 | 2.50E-50 |
| novel_pir818  | 221 | 0 | 7.53 | 0.001 | -12.87843415 | Down | 7.81E-51 | 2.50E-50 |
| novel_pir11   | 220 | 0 | 7.49 | 0.001 | -12.87075    | Down | 1.32E-50 | 4.19E-50 |
| novel_pir488  | 220 | 0 | 7.49 | 0.001 | -12.87075    | Down | 1.32E-50 | 4.19E-50 |
| novel_pir689  | 220 | 0 | 7.49 | 0.001 | -12.87075    | Down | 1.32E-50 | 4.18E-50 |
| novel_pir2126 | 219 | 0 | 7.46 | 0.001 | -12.86495992 | Down | 2.22E-50 | 7.03E-50 |
| novel_pir1722 | 219 | 0 | 7.46 | 0.001 | -12.86495992 | Down | 2.22E-50 | 7.02E-50 |
| novel_pir2225 | 219 | 0 | 7.46 | 0.001 | -12.86495992 | Down | 2.22E-50 | 7.00E-50 |
| novel_pir1418 | 218 | 0 | 7.42 | 0.001 | -12.85720347 | Down | 3.75E-50 | 1.18E-49 |
| novel_pir1146 | 218 | 0 | 7.42 | 0.001 | -12.85720347 | Down | 3.75E-50 | 1.18E-49 |
| novel_pir213  | 217 | 0 | 7.39 | 0.001 | -12.85135865 | Down | 6.32E-50 | 1.97E-49 |
| novel_pir100  | 217 | 0 | 7.39 | 0.001 | -12.85135865 | Down | 6.32E-50 | 1.97E-49 |
| novel_pir477  | 216 | 0 | 7.36 | 0.001 | -12.84549005 | Down | 1.07E-49 | 3.31E-49 |
| novel_pir1239 | 216 | 0 | 7.36 | 0.001 | -12.84549005 | Down | 1.07E-49 | 3.31E-49 |
| novel_pir2081 | 216 | 0 | 7.36 | 0.001 | -12.84549005 | Down | 1.07E-49 | 3.30E-49 |
| novel_pir465  | 216 | 0 | 7.36 | 0.001 | -12.84549005 | Down | 1.07E-49 | 3.30E-49 |
| novel_pir1328 | 216 | 0 | 7.36 | 0.001 | -12.84549005 | Down | 1.07E-49 | 3.29E-49 |
| novel_pir2347 | 215 | 0 | 7.32 | 0.001 | -12.83762793 | Down | 1.80E-49 | 5.53E-49 |

|               |     |   |      |       |              |      |          |          |
|---------------|-----|---|------|-------|--------------|------|----------|----------|
| novel_pir1047 | 215 | 0 | 7.32 | 0.001 | -12.83762793 | Down | 1.80E-49 | 5.53E-49 |
| novel_pir404  | 215 | 0 | 7.32 | 0.001 | -12.83762793 | Down | 1.80E-49 | 5.52E-49 |
| novel_pir1618 | 214 | 0 | 7.29 | 0.001 | -12.8317031  | Down | 3.03E-49 | 9.29E-49 |
| novel_pir1930 | 214 | 0 | 7.29 | 0.001 | -12.8317031  | Down | 3.03E-49 | 9.28E-49 |
| novel_pir139  | 213 | 0 | 7.25 | 0.001 | -12.82376528 | Down | 5.12E-49 | 1.56E-48 |
| novel_pir2148 | 213 | 0 | 7.25 | 0.001 | -12.82376528 | Down | 5.12E-49 | 1.55E-48 |
| novel_pir2298 | 212 | 0 | 7.22 | 0.001 | -12.81778312 | Down | 8.63E-49 | 2.61E-48 |
| novel_pir735  | 212 | 0 | 7.22 | 0.001 | -12.81778312 | Down | 8.63E-49 | 2.61E-48 |
| novel_pir1710 | 210 | 0 | 7.15 | 0.001 | -12.80372753 | Down | 2.46E-48 | 7.42E-48 |
| novel_pir104  | 209 | 0 | 7.12 | 0.001 | -12.79766153 | Down | 4.14E-48 | 1.25E-47 |
| novel_pir1423 | 209 | 0 | 7.12 | 0.001 | -12.79766153 | Down | 4.14E-48 | 1.25E-47 |
| novel_pir2183 | 208 | 0 | 7.08 | 0.001 | -12.78953364 | Down | 6.99E-48 | 2.10E-47 |
| novel_pir589  | 207 | 0 | 7.05 | 0.001 | -12.78340754 | Down | 1.18E-47 | 3.54E-47 |
| novel_pir2222 | 207 | 0 | 7.05 | 0.001 | -12.78340754 | Down | 1.18E-47 | 3.53E-47 |
| novel_pir1901 | 206 | 0 | 7.02 | 0.001 | -12.77725532 | Down | 1.99E-47 | 5.95E-47 |
| novel_pir2161 | 206 | 0 | 7.02 | 0.001 | -12.77725532 | Down | 1.99E-47 | 5.94E-47 |
| novel_pir1754 | 204 | 0 | 6.95 | 0.001 | -12.76279726 | Down | 5.66E-47 | 1.69E-46 |
| novel_pir1295 | 203 | 0 | 6.91 | 0.001 | -12.75447    | Down | 9.55E-47 | 2.84E-46 |
| novel_pir683  | 203 | 0 | 6.91 | 0.001 | -12.75447    | Down | 9.55E-47 | 2.84E-46 |
| novel_pir1094 | 203 | 0 | 6.91 | 0.001 | -12.75447    | Down | 9.55E-47 | 2.83E-46 |
| novel_pir1674 | 202 | 0 | 6.88 | 0.001 | -12.74819285 | Down | 1.61E-46 | 4.77E-46 |
| novel_pir723  | 202 | 0 | 6.88 | 0.001 | -12.74819285 | Down | 1.61E-46 | 4.76E-46 |
| novel_pir509  | 202 | 0 | 6.88 | 0.001 | -12.74819285 | Down | 1.61E-46 | 4.76E-46 |
| novel_pir455  | 202 | 0 | 6.88 | 0.001 | -12.74819285 | Down | 1.61E-46 | 4.75E-46 |
| novel_pir54   | 201 | 0 | 6.85 | 0.001 | -12.74188827 | Down | 2.72E-46 | 7.99E-46 |
| novel_pir1243 | 201 | 0 | 6.85 | 0.001 | -12.74188827 | Down | 2.72E-46 | 7.97E-46 |
| novel_pir948  | 200 | 0 | 6.81 | 0.001 | -12.73343908 | Down | 4.58E-46 | 1.34E-45 |
| novel_pir2114 | 200 | 0 | 6.81 | 0.001 | -12.73343908 | Down | 4.58E-46 | 1.34E-45 |
| novel_pir1187 | 200 | 0 | 6.81 | 0.001 | -12.73343908 | Down | 4.58E-46 | 1.34E-45 |
| novel_pir1897 | 199 | 0 | 6.78 | 0.001 | -12.72706956 | Down | 7.73E-46 | 2.25E-45 |
| novel_pir1251 | 199 | 0 | 6.78 | 0.001 | -12.72706956 | Down | 7.73E-46 | 2.25E-45 |
| novel_pir2352 | 199 | 0 | 6.78 | 0.001 | -12.72706956 | Down | 7.73E-46 | 2.25E-45 |
| novel_pir672  | 198 | 0 | 6.74 | 0.001 | -12.71853288 | Down | 1.30E-45 | 3.77E-45 |
| novel_pir891  | 198 | 0 | 6.74 | 0.001 | -12.71853288 | Down | 1.30E-45 | 3.76E-45 |
| novel_pir705  | 198 | 0 | 6.74 | 0.001 | -12.71853288 | Down | 1.30E-45 | 3.76E-45 |
| novel_pir258  | 197 | 0 | 6.71 | 0.001 | -12.71209705 | Down | 2.20E-45 | 6.33E-45 |

|               |     |   |      |       |              |      |          |          |
|---------------|-----|---|------|-------|--------------|------|----------|----------|
| novel_pir1117 | 196 | 0 | 6.67 | 0.001 | -12.70347105 | Down | 3.71E-45 | 1.06E-44 |
| novel_pir1150 | 195 | 0 | 6.64 | 0.001 | -12.69696753 | Down | 6.26E-45 | 1.79E-44 |
| novel_pir1761 | 195 | 0 | 6.64 | 0.001 | -12.69696753 | Down | 6.26E-45 | 1.79E-44 |
| novel_pir2267 | 195 | 0 | 6.64 | 0.001 | -12.69696753 | Down | 6.26E-45 | 1.79E-44 |
| novel_pir2307 | 194 | 0 | 6.61 | 0.001 | -12.69043456 | Down | 1.06E-44 | 3.01E-44 |
| novel_pir2009 | 194 | 0 | 6.61 | 0.001 | -12.69043456 | Down | 1.06E-44 | 3.00E-44 |
| novel_pir909  | 194 | 0 | 6.61 | 0.001 | -12.69043456 | Down | 1.06E-44 | 3.00E-44 |
| novel_pir1589 | 193 | 0 | 6.57 | 0.001 | -12.68167766 | Down | 1.78E-44 | 5.04E-44 |
| novel_pir1625 | 193 | 0 | 6.57 | 0.001 | -12.68167766 | Down | 1.78E-44 | 5.04E-44 |
| novel_pir286  | 193 | 0 | 6.57 | 0.001 | -12.68167766 | Down | 1.78E-44 | 5.03E-44 |
| novel_pir745  | 193 | 0 | 6.57 | 0.001 | -12.68167766 | Down | 1.78E-44 | 5.02E-44 |
| novel_pir2102 | 192 | 0 | 6.54 | 0.001 | -12.67507492 | Down | 3.00E-44 | 8.46E-44 |
| novel_pir952  | 191 | 0 | 6.5  | 0.001 | -12.666224   | Down | 5.07E-44 | 1.42E-43 |
| novel_pir2313 | 191 | 0 | 6.5  | 0.001 | -12.666224   | Down | 5.07E-44 | 1.42E-43 |
| novel_pir1513 | 191 | 0 | 6.5  | 0.001 | -12.666224   | Down | 5.07E-44 | 1.42E-43 |
| novel_pir831  | 190 | 0 | 6.47 | 0.001 | -12.65955    | Down | 8.54E-44 | 2.39E-43 |
| novel_pir762  | 190 | 0 | 6.47 | 0.001 | -12.65955    | Down | 8.54E-44 | 2.39E-43 |
| novel_pir1553 | 190 | 0 | 6.47 | 0.001 | -12.65955    | Down | 8.54E-44 | 2.39E-43 |
| novel_pir561  | 189 | 0 | 6.44 | 0.001 | -12.65284497 | Down | 1.44E-43 | 4.01E-43 |
| novel_pir838  | 189 | 0 | 6.44 | 0.001 | -12.65284497 | Down | 1.44E-43 | 4.01E-43 |
| novel_pir1342 | 188 | 0 | 6.4  | 0.001 | -12.64385619 | Down | 2.43E-43 | 6.75E-43 |
| novel_pir2021 | 188 | 0 | 6.4  | 0.001 | -12.64385619 | Down | 2.43E-43 | 6.74E-43 |
| novel_pir868  | 188 | 0 | 6.4  | 0.001 | -12.64385619 | Down | 2.43E-43 | 6.73E-43 |
| novel_pir953  | 187 | 0 | 6.37 | 0.001 | -12.63707766 | Down | 4.10E-43 | 1.13E-42 |
| novel_pir734  | 187 | 0 | 6.37 | 0.001 | -12.63707766 | Down | 4.10E-43 | 1.13E-42 |
| novel_pir1163 | 187 | 0 | 6.37 | 0.001 | -12.63707766 | Down | 4.10E-43 | 1.13E-42 |
| novel_pir1362 | 187 | 0 | 6.37 | 0.001 | -12.63707766 | Down | 4.10E-43 | 1.13E-42 |
| novel_pir1925 | 187 | 0 | 6.37 | 0.001 | -12.63707766 | Down | 4.10E-43 | 1.13E-42 |
| novel_pir1505 | 186 | 0 | 6.33 | 0.001 | -12.62798978 | Down | 6.92E-43 | 1.90E-42 |
| novel_pir1560 | 186 | 0 | 6.33 | 0.001 | -12.62798978 | Down | 6.92E-43 | 1.89E-42 |
| novel_pir280  | 185 | 0 | 6.3  | 0.001 | -12.62113611 | Down | 1.17E-42 | 3.19E-42 |
| novel_pir643  | 184 | 0 | 6.27 | 0.001 | -12.61424973 | Down | 1.97E-42 | 5.36E-42 |
| novel_pir2249 | 183 | 0 | 6.23 | 0.001 | -12.60501645 | Down | 3.32E-42 | 9.03E-42 |
| novel_pir2377 | 183 | 0 | 6.23 | 0.001 | -12.60501645 | Down | 3.32E-42 | 9.02E-42 |
| novel_pir1966 | 183 | 0 | 6.23 | 0.001 | -12.60501645 | Down | 3.32E-42 | 9.01E-42 |
| novel_pir1286 | 182 | 0 | 6.2  | 0.001 | -12.5980525  | Down | 5.60E-42 | 1.52E-41 |

|               |     |   |      |       |              |      |          |          |
|---------------|-----|---|------|-------|--------------|------|----------|----------|
| novel_pir2290 | 182 | 0 | 6.2  | 0.001 | -12.5980525  | Down | 5.60E-42 | 1.52E-41 |
| novel_pir1658 | 182 | 0 | 6.2  | 0.001 | -12.5980525  | Down | 5.60E-42 | 1.51E-41 |
| novel_pir323  | 182 | 0 | 6.2  | 0.001 | -12.5980525  | Down | 5.60E-42 | 1.51E-41 |
| novel_pir1315 | 181 | 0 | 6.16 | 0.001 | -12.58871464 | Down | 9.45E-42 | 2.55E-41 |
| novel_pir1473 | 181 | 0 | 6.16 | 0.001 | -12.58871464 | Down | 9.45E-42 | 2.54E-41 |
| novel_pir57   | 179 | 0 | 6.1  | 0.001 | -12.57459353 | Down | 2.69E-41 | 7.21E-41 |
| novel_pir1622 | 178 | 0 | 6.06 | 0.001 | -12.56510208 | Down | 4.53E-41 | 1.21E-40 |
| novel_pir1529 | 178 | 0 | 6.06 | 0.001 | -12.56510208 | Down | 4.53E-41 | 1.21E-40 |
| novel_pir1470 | 178 | 0 | 6.06 | 0.001 | -12.56510208 | Down | 4.53E-41 | 1.21E-40 |
| novel_pir2458 | 178 | 0 | 6.06 | 0.001 | -12.56510208 | Down | 4.53E-41 | 1.21E-40 |
| novel_pir1119 | 178 | 0 | 6.06 | 0.001 | -12.56510208 | Down | 4.53E-41 | 1.21E-40 |
| novel_pir1419 | 178 | 0 | 6.06 | 0.001 | -12.56510208 | Down | 4.53E-41 | 1.21E-40 |
| novel_pir1607 | 178 | 0 | 6.06 | 0.001 | -12.56510208 | Down | 4.53E-41 | 1.20E-40 |
| novel_pir874  | 178 | 0 | 6.06 | 0.001 | -12.56510208 | Down | 4.53E-41 | 1.20E-40 |
| novel_pir1048 | 177 | 0 | 6.03 | 0.001 | -12.55794229 | Down | 7.65E-41 | 2.03E-40 |
| novel_pir1577 | 176 | 0 | 5.99 | 0.001 | -12.54834029 | Down | 1.29E-40 | 3.40E-40 |
| novel_pir1799 | 176 | 0 | 5.99 | 0.001 | -12.54834029 | Down | 1.29E-40 | 3.39E-40 |
| novel_pir2442 | 175 | 0 | 5.96 | 0.001 | -12.54109662 | Down | 2.18E-40 | 5.71E-40 |
| novel_pir1537 | 175 | 0 | 5.96 | 0.001 | -12.54109662 | Down | 2.18E-40 | 5.70E-40 |
| novel_pir248  | 175 | 0 | 5.96 | 0.001 | -12.54109662 | Down | 2.18E-40 | 5.70E-40 |
| novel_pir1692 | 174 | 0 | 5.93 | 0.001 | -12.53381639 | Down | 3.67E-40 | 9.60E-40 |
| novel_pir970  | 174 | 0 | 5.93 | 0.001 | -12.53381639 | Down | 3.67E-40 | 9.58E-40 |
| novel_pir2186 | 172 | 0 | 5.86 | 0.001 | -12.51668495 | Down | 1.04E-39 | 2.72E-39 |
| novel_pir1321 | 172 | 0 | 5.86 | 0.001 | -12.51668495 | Down | 1.04E-39 | 2.72E-39 |
| novel_pir1018 | 172 | 0 | 5.86 | 0.001 | -12.51668495 | Down | 1.04E-39 | 2.72E-39 |
| novel_pir1783 | 172 | 0 | 5.86 | 0.001 | -12.51668495 | Down | 1.04E-39 | 2.71E-39 |
| novel_pir2454 | 171 | 0 | 5.82 | 0.001 | -12.50680344 | Down | 1.76E-39 | 4.56E-39 |
| novel_pir110  | 171 | 0 | 5.82 | 0.001 | -12.50680344 | Down | 1.76E-39 | 4.55E-39 |
| novel_pir2343 | 170 | 0 | 5.79 | 0.001 | -12.49934763 | Down | 2.97E-39 | 7.65E-39 |
| novel_pir1270 | 170 | 0 | 5.79 | 0.001 | -12.49934763 | Down | 2.97E-39 | 7.64E-39 |
| novel_pir742  | 170 | 0 | 5.79 | 0.001 | -12.49934763 | Down | 2.97E-39 | 7.63E-39 |
| novel_pir1802 | 170 | 0 | 5.79 | 0.001 | -12.49934763 | Down | 2.97E-39 | 7.62E-39 |
| novel_pir2274 | 167 | 0 | 5.69 | 0.001 | -12.47421294 | Down | 1.43E-38 | 3.65E-38 |
| novel_pir979  | 167 | 0 | 5.69 | 0.001 | -12.47421294 | Down | 1.43E-38 | 3.64E-38 |
| novel_pir2285 | 167 | 0 | 5.69 | 0.001 | -12.47421294 | Down | 1.43E-38 | 3.64E-38 |
| novel_pir918  | 167 | 0 | 5.69 | 0.001 | -12.47421294 | Down | 1.43E-38 | 3.63E-38 |

|               |     |   |      |       |              |      |          |          |
|---------------|-----|---|------|-------|--------------|------|----------|----------|
| novel_pir2180 | 167 | 0 | 5.69 | 0.001 | -12.47421294 | Down | 1.43E-38 | 3.63E-38 |
| novel_pir1758 | 165 | 0 | 5.62 | 0.001 | -12.45635442 | Down | 4.06E-38 | 1.03E-37 |
| novel_pir1806 | 165 | 0 | 5.62 | 0.001 | -12.45635442 | Down | 4.06E-38 | 1.03E-37 |
| novel_pir1906 | 164 | 0 | 5.59 | 0.001 | -12.44863257 | Down | 6.84E-38 | 1.73E-37 |
| novel_pir2355 | 164 | 0 | 5.59 | 0.001 | -12.44863257 | Down | 6.84E-38 | 1.73E-37 |
| novel_pir2045 | 164 | 0 | 5.59 | 0.001 | -12.44863257 | Down | 6.84E-38 | 1.73E-37 |
| novel_pir1661 | 164 | 0 | 5.59 | 0.001 | -12.44863257 | Down | 6.84E-38 | 1.73E-37 |
| novel_pir1877 | 163 | 0 | 5.55 | 0.001 | -12.43827206 | Down | 1.15E-37 | 2.91E-37 |
| novel_pir712  | 163 | 0 | 5.55 | 0.001 | -12.43827206 | Down | 1.15E-37 | 2.90E-37 |
| novel_pir1873 | 163 | 0 | 5.55 | 0.001 | -12.43827206 | Down | 1.15E-37 | 2.90E-37 |
| novel_pir1948 | 162 | 0 | 5.52 | 0.001 | -12.43045255 | Down | 1.95E-37 | 4.89E-37 |
| novel_pir1125 | 161 | 0 | 5.48 | 0.001 | -12.41996018 | Down | 3.28E-37 | 8.23E-37 |
| novel_pir312  | 158 | 0 | 5.38 | 0.001 | -12.39339046 | Down | 1.58E-36 | 3.93E-36 |
| novel_pir1872 | 157 | 0 | 5.35 | 0.001 | -12.38532318 | Down | 2.66E-36 | 6.61E-36 |
| novel_pir1675 | 157 | 0 | 5.35 | 0.001 | -12.38532318 | Down | 2.66E-36 | 6.60E-36 |
| novel_pir1525 | 157 | 0 | 5.35 | 0.001 | -12.38532318 | Down | 2.66E-36 | 6.60E-36 |
| novel_pir29   | 157 | 0 | 5.35 | 0.001 | -12.38532318 | Down | 2.66E-36 | 6.59E-36 |
| novel_pir828  | 157 | 0 | 5.35 | 0.001 | -12.38532318 | Down | 2.66E-36 | 6.58E-36 |
| novel_pir1860 | 156 | 0 | 5.31 | 0.001 | -12.37449615 | Down | 4.49E-36 | 1.11E-35 |
| novel_pir1719 | 155 | 0 | 5.28 | 0.001 | -12.36632221 | Down | 7.57E-36 | 1.87E-35 |
| novel_pir2190 | 155 | 0 | 5.28 | 0.001 | -12.36632221 | Down | 7.57E-36 | 1.86E-35 |
| novel_pir2116 | 154 | 0 | 5.24 | 0.001 | -12.3553511  | Down | 1.28E-35 | 3.14E-35 |
| novel_pir1708 | 154 | 0 | 5.24 | 0.001 | -12.3553511  | Down | 1.28E-35 | 3.14E-35 |
| novel_pir1169 | 153 | 0 | 5.21 | 0.001 | -12.34706766 | Down | 2.15E-35 | 5.27E-35 |
| novel_pir1089 | 153 | 0 | 5.21 | 0.001 | -12.34706766 | Down | 2.15E-35 | 5.27E-35 |
| novel_pir301  | 152 | 0 | 5.18 | 0.001 | -12.33873638 | Down | 3.63E-35 | 8.87E-35 |
| novel_pir1784 | 151 | 0 | 5.14 | 0.001 | -12.32755264 | Down | 6.13E-35 | 1.49E-34 |
| novel_pir814  | 150 | 0 | 5.11 | 0.001 | -12.31910758 | Down | 1.03E-34 | 2.51E-34 |
| novel_pir1178 | 149 | 0 | 5.07 | 0.001 | -12.30777003 | Down | 1.74E-34 | 4.22E-34 |
| novel_pir2430 | 149 | 0 | 5.07 | 0.001 | -12.30777003 | Down | 1.74E-34 | 4.21E-34 |
| novel_pir657  | 149 | 0 | 5.07 | 0.001 | -12.30777003 | Down | 1.74E-34 | 4.21E-34 |
| novel_pir1667 | 149 | 0 | 5.07 | 0.001 | -12.30777003 | Down | 1.74E-34 | 4.20E-34 |
| novel_pir794  | 148 | 0 | 5.04 | 0.001 | -12.29920802 | Down | 2.94E-34 | 7.08E-34 |
| novel_pir929  | 148 | 0 | 5.04 | 0.001 | -12.29920802 | Down | 2.94E-34 | 7.07E-34 |
| novel_pir916  | 147 | 0 | 5.01 | 0.001 | -12.29059489 | Down | 4.96E-34 | 1.19E-33 |
| novel_pir310  | 147 | 0 | 5.01 | 0.001 | -12.29059489 | Down | 4.96E-34 | 1.19E-33 |

|               |     |   |      |       |              |      |          |          |
|---------------|-----|---|------|-------|--------------|------|----------|----------|
| novel_pir1487 | 146 | 0 | 4.97 | 0.001 | -12.27903014 | Down | 8.37E-34 | 1.99E-33 |
| novel_pir424  | 145 | 0 | 4.94 | 0.001 | -12.27029533 | Down | 1.41E-33 | 3.35E-33 |
| novel_pir732  | 145 | 0 | 4.94 | 0.001 | -12.27029533 | Down | 1.41E-33 | 3.35E-33 |
| novel_pir1698 | 145 | 0 | 4.94 | 0.001 | -12.27029533 | Down | 1.41E-33 | 3.34E-33 |
| novel_pir236  | 145 | 0 | 4.94 | 0.001 | -12.27029533 | Down | 1.41E-33 | 3.34E-33 |
| novel_pir744  | 144 | 0 | 4.9  | 0.001 | -12.25856603 | Down | 2.38E-33 | 5.62E-33 |
| novel_pir614  | 143 | 0 | 4.87 | 0.001 | -12.24970606 | Down | 4.02E-33 | 9.45E-33 |
| novel_pir1773 | 143 | 0 | 4.87 | 0.001 | -12.24970606 | Down | 4.02E-33 | 9.44E-33 |
| novel_pir1122 | 143 | 0 | 4.87 | 0.001 | -12.24970606 | Down | 4.02E-33 | 9.43E-33 |
| novel_pir1372 | 142 | 0 | 4.84 | 0.001 | -12.24079133 | Down | 6.77E-33 | 1.59E-32 |
| novel_pir1969 | 142 | 0 | 4.84 | 0.001 | -12.24079133 | Down | 6.77E-33 | 1.59E-32 |
| novel_pir2167 | 142 | 0 | 4.84 | 0.001 | -12.24079133 | Down | 6.77E-33 | 1.58E-32 |
| novel_pir1947 | 141 | 0 | 4.8  | 0.001 | -12.22881869 | Down | 1.14E-32 | 2.67E-32 |
| novel_pir2465 | 141 | 0 | 4.8  | 0.001 | -12.22881869 | Down | 1.14E-32 | 2.67E-32 |
| novel_pir2117 | 141 | 0 | 4.8  | 0.001 | -12.22881869 | Down | 1.14E-32 | 2.66E-32 |
| novel_pir394  | 140 | 0 | 4.77 | 0.001 | -12.21977355 | Down | 1.93E-32 | 4.48E-32 |
| novel_pir1093 | 140 | 0 | 4.77 | 0.001 | -12.21977355 | Down | 1.93E-32 | 4.47E-32 |
| novel_pir1809 | 140 | 0 | 4.77 | 0.001 | -12.21977355 | Down | 1.93E-32 | 4.47E-32 |
| novel_pir935  | 138 | 0 | 4.7  | 0.001 | -12.19844504 | Down | 5.48E-32 | 1.26E-31 |
| novel_pir593  | 138 | 0 | 4.7  | 0.001 | -12.19844504 | Down | 5.48E-32 | 1.26E-31 |
| novel_pir844  | 138 | 0 | 4.7  | 0.001 | -12.19844504 | Down | 5.48E-32 | 1.26E-31 |
| novel_pir2025 | 138 | 0 | 4.7  | 0.001 | -12.19844504 | Down | 5.48E-32 | 1.26E-31 |
| novel_pir2061 | 137 | 0 | 4.67 | 0.001 | -12.18920683 | Down | 9.25E-32 | 2.12E-31 |
| novel_pir798  | 137 | 0 | 4.67 | 0.001 | -12.18920683 | Down | 9.25E-32 | 2.12E-31 |
| novel_pir1240 | 137 | 0 | 4.67 | 0.001 | -12.18920683 | Down | 9.25E-32 | 2.12E-31 |
| novel_pir585  | 136 | 0 | 4.63 | 0.001 | -12.17679648 | Down | 1.56E-31 | 3.56E-31 |
| novel_pir1797 | 136 | 0 | 4.63 | 0.001 | -12.17679648 | Down | 1.56E-31 | 3.55E-31 |
| novel_pir2350 | 136 | 0 | 4.63 | 0.001 | -12.17679648 | Down | 1.56E-31 | 3.55E-31 |
| novel_pir1242 | 135 | 0 | 4.6  | 0.001 | -12.16741815 | Down | 2.63E-31 | 5.98E-31 |
| novel_pir1991 | 135 | 0 | 4.6  | 0.001 | -12.16741815 | Down | 2.63E-31 | 5.97E-31 |
| novel_pir2238 | 135 | 0 | 4.6  | 0.001 | -12.16741815 | Down | 2.63E-31 | 5.97E-31 |
| novel_pir1171 | 134 | 0 | 4.56 | 0.001 | -12.15481811 | Down | 4.44E-31 | 1.00E-30 |
| novel_pir925  | 134 | 0 | 4.56 | 0.001 | -12.15481811 | Down | 4.44E-31 | 1.00E-30 |
| novel_pir2150 | 133 | 0 | 4.53 | 0.001 | -12.14529533 | Down | 7.49E-31 | 1.69E-30 |
| novel_pir266  | 133 | 0 | 4.53 | 0.001 | -12.14529533 | Down | 7.49E-31 | 1.69E-30 |
| novel_pir64   | 132 | 0 | 4.5  | 0.001 | -12.13570929 | Down | 1.26E-30 | 2.84E-30 |



|               |     |   |      |       |              |      |          |          |
|---------------|-----|---|------|-------|--------------|------|----------|----------|
| novel_pir2213 | 132 | 0 | 4.5  | 0.001 | -12.13570929 | Down | 1.26E-30 | 2.83E-30 |
| novel_pir318  | 132 | 0 | 4.5  | 0.001 | -12.13570929 | Down | 1.26E-30 | 2.83E-30 |
| novel_pir994  | 132 | 0 | 4.5  | 0.001 | -12.13570929 | Down | 1.26E-30 | 2.83E-30 |
| novel_pir1612 | 131 | 0 | 4.46 | 0.001 | -12.12282799 | Down | 2.13E-30 | 4.76E-30 |
| novel_pir1790 | 131 | 0 | 4.46 | 0.001 | -12.12282799 | Down | 2.13E-30 | 4.75E-30 |
| novel_pir1138 | 131 | 0 | 4.46 | 0.001 | -12.12282799 | Down | 2.13E-30 | 4.75E-30 |
| novel_pir1472 | 130 | 0 | 4.43 | 0.001 | -12.11309098 | Down | 3.59E-30 | 8.00E-30 |
| novel_pir827  | 130 | 0 | 4.43 | 0.001 | -12.11309098 | Down | 3.59E-30 | 7.99E-30 |
| novel_pir2141 | 128 | 0 | 4.36 | 0.001 | -12.09011242 | Down | 1.02E-29 | 2.27E-29 |
| novel_pir879  | 128 | 0 | 4.36 | 0.001 | -12.09011242 | Down | 1.02E-29 | 2.26E-29 |
| novel_pir1683 | 127 | 0 | 4.33 | 0.001 | -12.08015131 | Down | 1.72E-29 | 3.80E-29 |
| novel_pir1147 | 127 | 0 | 4.33 | 0.001 | -12.08015131 | Down | 1.72E-29 | 3.79E-29 |
| novel_pir1212 | 126 | 0 | 4.29 | 0.001 | -12.06676193 | Down | 2.91E-29 | 6.37E-29 |
| novel_pir2145 | 125 | 0 | 4.26 | 0.001 | -12.05663772 | Down | 4.91E-29 | 1.07E-28 |
| novel_pir2284 | 125 | 0 | 4.26 | 0.001 | -12.05663772 | Down | 4.91E-29 | 1.07E-28 |
| novel_pir1399 | 124 | 0 | 4.22 | 0.001 | -12.04302728 | Down | 8.28E-29 | 1.80E-28 |
| novel_pir500  | 124 | 0 | 4.22 | 0.001 | -12.04302728 | Down | 8.28E-29 | 1.80E-28 |
| novel_pir2146 | 124 | 0 | 4.22 | 0.001 | -12.04302728 | Down | 8.28E-29 | 1.80E-28 |
| novel_pir1211 | 124 | 0 | 4.22 | 0.001 | -12.04302728 | Down | 8.28E-29 | 1.79E-28 |
| novel_pir2125 | 123 | 0 | 4.19 | 0.001 | -12.03273453 | Down | 1.40E-28 | 3.02E-28 |
| novel_pir2341 | 123 | 0 | 4.19 | 0.001 | -12.03273453 | Down | 1.40E-28 | 3.02E-28 |
| novel_pir2344 | 122 | 0 | 4.15 | 0.001 | -12.01889562 | Down | 2.36E-28 | 5.08E-28 |
| novel_pir405  | 122 | 0 | 4.15 | 0.001 | -12.01889562 | Down | 2.36E-28 | 5.08E-28 |
| novel_pir1182 | 122 | 0 | 4.15 | 0.001 | -12.01889562 | Down | 2.36E-28 | 5.07E-28 |
| novel_pir846  | 121 | 0 | 4.12 | 0.001 | -12.00842862 | Down | 3.97E-28 | 8.52E-28 |
| novel_pir1536 | 120 | 0 | 4.09 | 0.001 | -11.99788513 | Down | 6.70E-28 | 1.44E-27 |
| novel_pir34   | 120 | 0 | 4.09 | 0.001 | -11.99788513 | Down | 6.70E-28 | 1.43E-27 |
| novel_pir644  | 119 | 0 | 4.05 | 0.001 | -11.98370619 | Down | 1.13E-27 | 2.41E-27 |
| novel_pir2475 | 119 | 0 | 4.05 | 0.001 | -11.98370619 | Down | 1.13E-27 | 2.41E-27 |
| novel_pir1725 | 119 | 0 | 4.05 | 0.001 | -11.98370619 | Down | 1.13E-27 | 2.40E-27 |
| novel_pir543  | 119 | 0 | 4.05 | 0.001 | -11.98370619 | Down | 1.13E-27 | 2.40E-27 |
| novel_pir1076 | 118 | 0 | 4.02 | 0.001 | -11.97297979 | Down | 1.91E-27 | 4.04E-27 |
| novel_pir1811 | 118 | 0 | 4.02 | 0.001 | -11.97297979 | Down | 1.91E-27 | 4.04E-27 |
| novel_pir1530 | 118 | 0 | 4.02 | 0.001 | -11.97297979 | Down | 1.91E-27 | 4.03E-27 |
| novel_pir2203 | 117 | 0 | 3.98 | 0.001 | -11.95855272 | Down | 3.22E-27 | 6.78E-27 |
| novel_pir1143 | 117 | 0 | 3.98 | 0.001 | -11.95855272 | Down | 3.22E-27 | 6.77E-27 |

|               |     |   |      |       |              |      |          |          |
|---------------|-----|---|------|-------|--------------|------|----------|----------|
| novel_pir1361 | 117 | 0 | 3.98 | 0.001 | -11.95855272 | Down | 3.22E-27 | 6.76E-27 |
| novel_pir987  | 117 | 0 | 3.98 | 0.001 | -11.95855272 | Down | 3.22E-27 | 6.75E-27 |
| novel_pir72   | 116 | 0 | 3.95 | 0.001 | -11.94763694 | Down | 5.43E-27 | 1.14E-26 |
| novel_pir1554 | 115 | 0 | 3.92 | 0.001 | -11.93663794 | Down | 9.15E-27 | 1.92E-26 |
| novel_pir397  | 114 | 0 | 3.88 | 0.001 | -11.92184094 | Down | 1.54E-26 | 3.22E-26 |
| novel_pir803  | 114 | 0 | 3.88 | 0.001 | -11.92184094 | Down | 1.54E-26 | 3.22E-26 |
| novel_pir2242 | 113 | 0 | 3.85 | 0.001 | -11.91064273 | Down | 2.60E-26 | 5.43E-26 |
| novel_pir2320 | 113 | 0 | 3.85 | 0.001 | -11.91064273 | Down | 2.60E-26 | 5.42E-26 |
| novel_pir472  | 113 | 0 | 3.85 | 0.001 | -11.91064273 | Down | 2.60E-26 | 5.42E-26 |
| novel_pir284  | 113 | 0 | 3.85 | 0.001 | -11.91064273 | Down | 2.60E-26 | 5.41E-26 |
| novel_pir1228 | 112 | 0 | 3.81 | 0.001 | -11.89557528 | Down | 4.39E-26 | 9.11E-26 |
| novel_pir355  | 112 | 0 | 3.81 | 0.001 | -11.89557528 | Down | 4.39E-26 | 9.10E-26 |
| novel_pir2445 | 112 | 0 | 3.81 | 0.001 | -11.89557528 | Down | 4.39E-26 | 9.09E-26 |
| novel_pir1071 | 111 | 0 | 3.78 | 0.001 | -11.88417052 | Down | 7.41E-26 | 1.53E-25 |
| novel_pir1049 | 110 | 0 | 3.75 | 0.001 | -11.87267488 | Down | 1.25E-25 | 2.57E-25 |
| novel_pir903  | 110 | 0 | 3.75 | 0.001 | -11.87267488 | Down | 1.25E-25 | 2.57E-25 |
| novel_pir1202 | 110 | 0 | 3.75 | 0.001 | -11.87267488 | Down | 1.25E-25 | 2.57E-25 |
| novel_pir1768 | 109 | 0 | 3.71 | 0.001 | -11.85720347 | Down | 2.11E-25 | 4.33E-25 |
| novel_pir1981 | 108 | 0 | 3.68 | 0.001 | -11.84549005 | Down | 3.56E-25 | 7.24E-25 |
| novel_pir771  | 107 | 0 | 3.64 | 0.001 | -11.82972274 | Down | 6.00E-25 | 1.22E-24 |
| novel_pir1796 | 107 | 0 | 3.64 | 0.001 | -11.82972274 | Down | 6.00E-25 | 1.22E-24 |
| novel_pir332  | 106 | 0 | 3.61 | 0.001 | -11.81778312 | Down | 1.01E-24 | 2.05E-24 |
| novel_pir2194 | 106 | 0 | 3.61 | 0.001 | -11.81778312 | Down | 1.01E-24 | 2.05E-24 |
| novel_pir1422 | 105 | 0 | 3.58 | 0.001 | -11.80574387 | Down | 1.71E-24 | 3.45E-24 |
| novel_pir333  | 105 | 0 | 3.58 | 0.001 | -11.80574387 | Down | 1.71E-24 | 3.44E-24 |
| novel_pir1201 | 105 | 0 | 3.58 | 0.001 | -11.80574387 | Down | 1.71E-24 | 3.44E-24 |
| novel_pir227  | 105 | 0 | 3.58 | 0.001 | -11.80574387 | Down | 1.71E-24 | 3.43E-24 |
| novel_pir2079 | 104 | 0 | 3.54 | 0.001 | -11.78953364 | Down | 2.88E-24 | 5.79E-24 |
| novel_pir518  | 103 | 0 | 3.51 | 0.001 | -11.77725532 | Down | 4.86E-24 | 9.74E-24 |
| novel_pir1837 | 102 | 0 | 3.47 | 0.001 | -11.76071995 | Down | 8.19E-24 | 1.63E-23 |
| novel_pir1063 | 102 | 0 | 3.47 | 0.001 | -11.76071995 | Down | 8.19E-24 | 1.63E-23 |
| novel_pir1549 | 101 | 0 | 3.44 | 0.001 | -11.74819285 | Down | 1.38E-23 | 2.75E-23 |
| novel_pir750  | 101 | 0 | 3.44 | 0.001 | -11.74819285 | Down | 1.38E-23 | 2.75E-23 |
| novel_pir1491 | 101 | 0 | 3.44 | 0.001 | -11.74819285 | Down | 1.38E-23 | 2.75E-23 |
| novel_pir21   | 100 | 0 | 3.41 | 0.001 | -11.73555602 | Down | 2.33E-23 | 4.62E-23 |
| novel_pir1944 | 100 | 0 | 3.41 | 0.001 | -11.73555602 | Down | 2.33E-23 | 4.62E-23 |

|               |    |   |      |       |              |      |          |          |
|---------------|----|---|------|-------|--------------|------|----------|----------|
| novel_pir654  | 98 | 0 | 3.34 | 0.001 | -11.70563239 | Down | 6.63E-23 | 1.31E-22 |
| novel_pir1619 | 97 | 0 | 3.3  | 0.001 | -11.68825031 | Down | 1.12E-22 | 2.21E-22 |
| novel_pir1782 | 97 | 0 | 3.3  | 0.001 | -11.68825031 | Down | 1.12E-22 | 2.20E-22 |
| novel_pir2264 | 97 | 0 | 3.3  | 0.001 | -11.68825031 | Down | 1.12E-22 | 2.20E-22 |
| novel_pir2370 | 95 | 0 | 3.24 | 0.001 | -11.6617781  | Down | 3.18E-22 | 6.22E-22 |
| novel_pir1287 | 95 | 0 | 3.24 | 0.001 | -11.6617781  | Down | 3.18E-22 | 6.22E-22 |
| novel_pir1483 | 94 | 0 | 3.2  | 0.001 | -11.64385619 | Down | 5.37E-22 | 1.05E-21 |
| novel_pir1276 | 93 | 0 | 3.17 | 0.001 | -11.63026713 | Down | 9.06E-22 | 1.76E-21 |
| novel_pir1880 | 93 | 0 | 3.17 | 0.001 | -11.63026713 | Down | 9.06E-22 | 1.75E-21 |
| novel_pir2147 | 93 | 0 | 3.17 | 0.001 | -11.63026713 | Down | 9.06E-22 | 1.75E-21 |
| novel_pir968  | 93 | 0 | 3.17 | 0.001 | -11.63026713 | Down | 9.06E-22 | 1.75E-21 |
| novel_pir1309 | 92 | 0 | 3.13 | 0.001 | -11.61194694 | Down | 1.53E-21 | 2.95E-21 |
| novel_pir1714 | 92 | 0 | 3.13 | 0.001 | -11.61194694 | Down | 1.53E-21 | 2.95E-21 |
| novel_pir1357 | 92 | 0 | 3.13 | 0.001 | -11.61194694 | Down | 1.53E-21 | 2.95E-21 |
| novel_pir1946 | 91 | 0 | 3.1  | 0.001 | -11.5980525  | Down | 2.58E-21 | 4.94E-21 |
| novel_pir403  | 90 | 0 | 3.06 | 0.001 | -11.57931594 | Down | 4.35E-21 | 8.31E-21 |
| novel_pir696  | 89 | 0 | 3.03 | 0.001 | -11.56510208 | Down | 7.33E-21 | 1.40E-20 |
| novel_pir886  | 89 | 0 | 3.03 | 0.001 | -11.56510208 | Down | 7.33E-21 | 1.40E-20 |
| novel_pir478  | 88 | 0 | 3    | 0.001 | -11.55074679 | Down | 1.24E-20 | 2.36E-20 |
| novel_pir776  | 88 | 0 | 3    | 0.001 | -11.55074679 | Down | 1.24E-20 | 2.35E-20 |
| novel_pir322  | 88 | 0 | 3    | 0.001 | -11.55074679 | Down | 1.24E-20 | 2.35E-20 |
| novel_pir179  | 88 | 0 | 3    | 0.001 | -11.55074679 | Down | 1.24E-20 | 2.35E-20 |
| novel_pir624  | 87 | 0 | 2.96 | 0.001 | -11.53138146 | Down | 2.09E-20 | 3.96E-20 |
| novel_pir924  | 87 | 0 | 2.96 | 0.001 | -11.53138146 | Down | 2.09E-20 | 3.96E-20 |
| novel_pir1289 | 87 | 0 | 2.96 | 0.001 | -11.53138146 | Down | 2.09E-20 | 3.95E-20 |
| novel_pir912  | 86 | 0 | 2.93 | 0.001 | -11.51668495 | Down | 3.52E-20 | 6.64E-20 |
| novel_pir1410 | 86 | 0 | 2.93 | 0.001 | -11.51668495 | Down | 3.52E-20 | 6.63E-20 |
| novel_pir2259 | 86 | 0 | 2.93 | 0.001 | -11.51668495 | Down | 3.52E-20 | 6.63E-20 |
| novel_pir2106 | 85 | 0 | 2.89 | 0.001 | -11.49685378 | Down | 5.94E-20 | 1.12E-19 |
| novel_pir1132 | 84 | 0 | 2.86 | 0.001 | -11.48179943 | Down | 1.00E-19 | 1.88E-19 |
| novel_pir1861 | 84 | 0 | 2.86 | 0.001 | -11.48179943 | Down | 1.00E-19 | 1.88E-19 |
| novel_pir2431 | 84 | 0 | 2.86 | 0.001 | -11.48179943 | Down | 1.00E-19 | 1.87E-19 |
| novel_pir1235 | 83 | 0 | 2.83 | 0.001 | -11.46658634 | Down | 1.69E-19 | 3.16E-19 |
| novel_pir1051 | 83 | 0 | 2.83 | 0.001 | -11.46658634 | Down | 1.69E-19 | 3.16E-19 |
| novel_pir1741 | 82 | 0 | 2.79 | 0.001 | -11.44604941 | Down | 2.85E-19 | 5.31E-19 |
| novel_pir1844 | 82 | 0 | 2.79 | 0.001 | -11.44604941 | Down | 2.85E-19 | 5.31E-19 |

|               |    |   |      |       |              |      |          |          |
|---------------|----|---|------|-------|--------------|------|----------|----------|
| novel_pir2440 | 80 | 0 | 2.72 | 0.001 | -11.40939094 | Down | 8.11E-19 | 1.51E-18 |
| novel_pir2261 | 79 | 0 | 2.69 | 0.001 | -11.39339046 | Down | 1.37E-18 | 2.52E-18 |
| novel_pir307  | 79 | 0 | 2.69 | 0.001 | -11.39339046 | Down | 1.37E-18 | 2.52E-18 |
| novel_pir960  | 78 | 0 | 2.66 | 0.001 | -11.37721053 | Down | 2.31E-18 | 4.24E-18 |
| novel_pir1352 | 78 | 0 | 2.66 | 0.001 | -11.37721053 | Down | 2.31E-18 | 4.23E-18 |
| novel_pir1869 | 78 | 0 | 2.66 | 0.001 | -11.37721053 | Down | 2.31E-18 | 4.23E-18 |
| novel_pir1835 | 77 | 0 | 2.62 | 0.001 | -11.3553511  | Down | 3.89E-18 | 7.12E-18 |
| novel_pir1686 | 77 | 0 | 2.62 | 0.001 | -11.3553511  | Down | 3.89E-18 | 7.12E-18 |
| novel_pir30   | 77 | 0 | 2.62 | 0.001 | -11.3553511  | Down | 3.89E-18 | 7.11E-18 |
| novel_pir810  | 77 | 0 | 2.62 | 0.001 | -11.3553511  | Down | 3.89E-18 | 7.10E-18 |
| novel_pir562  | 76 | 0 | 2.59 | 0.001 | -11.33873638 | Down | 6.56E-18 | 1.19E-17 |
| novel_pir2428 | 75 | 0 | 2.55 | 0.001 | -11.31628153 | Down | 1.11E-17 | 2.01E-17 |
| novel_pir1810 | 74 | 0 | 2.52 | 0.001 | -11.29920802 | Down | 1.87E-17 | 3.38E-17 |
| novel_pir2426 | 74 | 0 | 2.52 | 0.001 | -11.29920802 | Down | 1.87E-17 | 3.38E-17 |
| novel_pir2473 | 73 | 0 | 2.49 | 0.001 | -11.28193003 | Down | 3.15E-17 | 5.69E-17 |
| novel_pir1555 | 73 | 0 | 2.49 | 0.001 | -11.28193003 | Down | 3.15E-17 | 5.68E-17 |
| novel_pir244  | 72 | 0 | 2.45 | 0.001 | -11.25856603 | Down | 5.31E-17 | 9.53E-17 |
| novel_pir2345 | 72 | 0 | 2.45 | 0.001 | -11.25856603 | Down | 5.31E-17 | 9.52E-17 |
| novel_pir361  | 72 | 0 | 2.45 | 0.001 | -11.25856603 | Down | 5.31E-17 | 9.51E-17 |
| novel_pir1085 | 71 | 0 | 2.42 | 0.001 | -11.24079133 | Down | 8.96E-17 | 1.60E-16 |
| novel_pir1521 | 71 | 0 | 2.42 | 0.001 | -11.24079133 | Down | 8.96E-17 | 1.60E-16 |
| novel_pir2342 | 71 | 0 | 2.42 | 0.001 | -11.24079133 | Down | 8.96E-17 | 1.60E-16 |
| novel_pir1124 | 71 | 0 | 2.42 | 0.001 | -11.24079133 | Down | 8.96E-17 | 1.59E-16 |
| novel_pir2028 | 71 | 0 | 2.42 | 0.001 | -11.24079133 | Down | 8.96E-17 | 1.59E-16 |
| novel_pir1268 | 70 | 0 | 2.38 | 0.001 | -11.21674586 | Down | 1.51E-16 | 2.68E-16 |
| novel_pir1550 | 69 | 0 | 2.35 | 0.001 | -11.19844504 | Down | 2.55E-16 | 4.51E-16 |
| novel_pir1164 | 69 | 0 | 2.35 | 0.001 | -11.19844504 | Down | 2.55E-16 | 4.50E-16 |
| novel_pir777  | 69 | 0 | 2.35 | 0.001 | -11.19844504 | Down | 2.55E-16 | 4.50E-16 |
| novel_pir2337 | 69 | 0 | 2.35 | 0.001 | -11.19844504 | Down | 2.55E-16 | 4.49E-16 |
| novel_pir2019 | 68 | 0 | 2.32 | 0.001 | -11.17990909 | Down | 4.30E-16 | 7.57E-16 |
| novel_pir1081 | 68 | 0 | 2.32 | 0.001 | -11.17990909 | Down | 4.30E-16 | 7.57E-16 |
| novel_pir2187 | 67 | 0 | 2.28 | 0.001 | -11.15481811 | Down | 7.25E-16 | 1.27E-15 |
| novel_pir1923 | 67 | 0 | 2.28 | 0.001 | -11.15481811 | Down | 7.25E-16 | 1.27E-15 |
| novel_pir1959 | 66 | 0 | 2.25 | 0.001 | -11.13570929 | Down | 1.22E-15 | 2.12E-15 |
| novel_pir962  | 66 | 0 | 2.25 | 0.001 | -11.13570929 | Down | 1.22E-15 | 2.12E-15 |
| novel_pir2188 | 65 | 0 | 2.21 | 0.001 | -11.10983065 | Down | 2.06E-15 | 3.57E-15 |

|               |    |   |      |       |              |      |          |          |
|---------------|----|---|------|-------|--------------|------|----------|----------|
| novel_pir661  | 65 | 0 | 2.21 | 0.001 | -11.10983065 | Down | 2.06E-15 | 3.56E-15 |
| novel_pir1938 | 64 | 0 | 2.18 | 0.001 | -11.09011242 | Down | 3.48E-15 | 5.97E-15 |
| novel_pir1299 | 64 | 0 | 2.18 | 0.001 | -11.09011242 | Down | 3.48E-15 | 5.97E-15 |
| novel_pir522  | 64 | 0 | 2.18 | 0.001 | -11.09011242 | Down | 3.48E-15 | 5.96E-15 |
| novel_pir1257 | 63 | 0 | 2.15 | 0.001 | -11.07012094 | Down | 5.87E-15 | 1.01E-14 |
| novel_pir896  | 63 | 0 | 2.15 | 0.001 | -11.07012094 | Down | 5.87E-15 | 1.00E-14 |
| novel_pir1193 | 63 | 0 | 2.15 | 0.001 | -11.07012094 | Down | 5.87E-15 | 1.00E-14 |
| novel_pir2143 | 60 | 0 | 2.04 | 0.001 | -10.99435344 | Down | 2.82E-14 | 4.76E-14 |
| novel_pir1841 | 60 | 0 | 2.04 | 0.001 | -10.99435344 | Down | 2.82E-14 | 4.76E-14 |
| novel_pir453  | 60 | 0 | 2.04 | 0.001 | -10.99435344 | Down | 2.82E-14 | 4.75E-14 |
| novel_pir2196 | 60 | 0 | 2.04 | 0.001 | -10.99435344 | Down | 2.82E-14 | 4.75E-14 |
| novel_pir1776 | 59 | 0 | 2.01 | 0.001 | -10.97297979 | Down | 4.75E-14 | 7.92E-14 |
| novel_pir760  | 58 | 0 | 1.98 | 0.001 | -10.95128471 | Down | 8.02E-14 | 1.33E-13 |
| novel_pir1300 | 58 | 0 | 1.98 | 0.001 | -10.95128471 | Down | 8.02E-14 | 1.33E-13 |
| novel_pir476  | 58 | 0 | 1.98 | 0.001 | -10.95128471 | Down | 8.02E-14 | 1.33E-13 |
| novel_pir1464 | 58 | 0 | 1.98 | 0.001 | -10.95128471 | Down | 8.02E-14 | 1.33E-13 |
| novel_pir867  | 58 | 0 | 1.98 | 0.001 | -10.95128471 | Down | 8.02E-14 | 1.33E-13 |
| novel_pir1839 | 58 | 0 | 1.98 | 0.001 | -10.95128471 | Down | 8.02E-14 | 1.33E-13 |
| novel_pir251  | 57 | 0 | 1.94 | 0.001 | -10.92184094 | Down | 1.35E-13 | 2.23E-13 |
| novel_pir2124 | 57 | 0 | 1.94 | 0.001 | -10.92184094 | Down | 1.35E-13 | 2.23E-13 |
| novel_pir1563 | 56 | 0 | 1.91 | 0.001 | -10.89935692 | Down | 2.28E-13 | 3.75E-13 |
| novel_pir1198 | 56 | 0 | 1.91 | 0.001 | -10.89935692 | Down | 2.28E-13 | 3.75E-13 |
| novel_pir692  | 56 | 0 | 1.91 | 0.001 | -10.89935692 | Down | 2.28E-13 | 3.75E-13 |
| novel_pir1197 | 56 | 0 | 1.91 | 0.001 | -10.89935692 | Down | 2.28E-13 | 3.74E-13 |
| novel_pir885  | 55 | 0 | 1.87 | 0.001 | -10.86882255 | Down | 3.85E-13 | 6.27E-13 |
| novel_pir80   | 55 | 0 | 1.87 | 0.001 | -10.86882255 | Down | 3.85E-13 | 6.27E-13 |
| novel_pir2151 | 55 | 0 | 1.87 | 0.001 | -10.86882255 | Down | 3.85E-13 | 6.26E-13 |
| novel_pir530  | 54 | 0 | 1.84 | 0.001 | -10.84549005 | Down | 6.49E-13 | 1.06E-12 |
| novel_pir325  | 54 | 0 | 1.84 | 0.001 | -10.84549005 | Down | 6.49E-13 | 1.05E-12 |
| novel_pir2069 | 54 | 0 | 1.84 | 0.001 | -10.84549005 | Down | 6.49E-13 | 1.05E-12 |
| novel_pir699  | 54 | 0 | 1.84 | 0.001 | -10.84549005 | Down | 6.49E-13 | 1.05E-12 |
| novel_pir565  | 54 | 0 | 1.84 | 0.001 | -10.84549005 | Down | 6.49E-13 | 1.05E-12 |
| novel_pir2063 | 53 | 0 | 1.8  | 0.001 | -10.81378119 | Down | 1.10E-12 | 1.76E-12 |
| novel_pir1000 | 53 | 0 | 1.8  | 0.001 | -10.81378119 | Down | 1.10E-12 | 1.76E-12 |
| novel_pir716  | 52 | 0 | 1.77 | 0.001 | -10.78953364 | Down | 1.85E-12 | 2.95E-12 |
| novel_pir1353 | 52 | 0 | 1.77 | 0.001 | -10.78953364 | Down | 1.85E-12 | 2.95E-12 |

|                |    |   |      |       |              |      |          |          |
|----------------|----|---|------|-------|--------------|------|----------|----------|
| novel_pir2065  | 52 | 0 | 1.77 | 0.001 | -10.78953364 | Down | 1.85E-12 | 2.95E-12 |
| mmu_piR_000634 | 52 | 0 | 1.77 | 0.001 | -10.78953364 | Down | 1.85E-12 | 2.95E-12 |
| novel_pir2459  | 52 | 0 | 1.77 | 0.001 | -10.78953364 | Down | 1.85E-12 | 2.95E-12 |
| novel_pir2030  | 52 | 0 | 1.77 | 0.001 | -10.78953364 | Down | 1.85E-12 | 2.94E-12 |
| novel_pir2326  | 51 | 0 | 1.74 | 0.001 | -10.76487159 | Down | 3.12E-12 | 4.96E-12 |
| novel_pir499   | 50 | 0 | 1.7  | 0.001 | -10.73131903 | Down | 5.26E-12 | 8.27E-12 |
| novel_pir977   | 50 | 0 | 1.7  | 0.001 | -10.73131903 | Down | 5.26E-12 | 8.26E-12 |
| novel_pir739   | 49 | 0 | 1.67 | 0.001 | -10.70563239 | Down | 8.87E-12 | 1.39E-11 |
| novel_pir1699  | 49 | 0 | 1.67 | 0.001 | -10.70563239 | Down | 8.87E-12 | 1.39E-11 |
| novel_pir267   | 49 | 0 | 1.67 | 0.001 | -10.70563239 | Down | 8.87E-12 | 1.39E-11 |
| novel_pir2208  | 49 | 0 | 1.67 | 0.001 | -10.70563239 | Down | 8.87E-12 | 1.39E-11 |
| novel_pir471   | 48 | 0 | 1.63 | 0.001 | -10.67065625 | Down | 1.50E-11 | 2.32E-11 |
| novel_pir965   | 48 | 0 | 1.63 | 0.001 | -10.67065625 | Down | 1.50E-11 | 2.32E-11 |
| novel_pir2152  | 47 | 0 | 1.6  | 0.001 | -10.64385619 | Down | 2.52E-11 | 3.88E-11 |
| novel_pir1087  | 47 | 0 | 1.6  | 0.001 | -10.64385619 | Down | 2.52E-11 | 3.88E-11 |
| novel_pir2328  | 47 | 0 | 1.6  | 0.001 | -10.64385619 | Down | 2.52E-11 | 3.87E-11 |
| novel_pir1606  | 46 | 0 | 1.57 | 0.001 | -10.61654884 | Down | 4.26E-11 | 6.53E-11 |
| novel_pir1929  | 46 | 0 | 1.57 | 0.001 | -10.61654884 | Down | 4.26E-11 | 6.53E-11 |
| novel_pir1165  | 46 | 0 | 1.57 | 0.001 | -10.61654884 | Down | 4.26E-11 | 6.52E-11 |
| novel_pir2361  | 45 | 0 | 1.53 | 0.001 | -10.57931594 | Down | 7.18E-11 | 1.09E-10 |
| novel_pir1254  | 45 | 0 | 1.53 | 0.001 | -10.57931594 | Down | 7.18E-11 | 1.09E-10 |
| novel_pir1344  | 45 | 0 | 1.53 | 0.001 | -10.57931594 | Down | 7.18E-11 | 1.08E-10 |
| novel_pir1200  | 44 | 0 | 1.5  | 0.001 | -10.55074679 | Down | 1.21E-10 | 1.83E-10 |
| novel_pir1367  | 44 | 0 | 1.5  | 0.001 | -10.55074679 | Down | 1.21E-10 | 1.83E-10 |
| novel_pir2177  | 44 | 0 | 1.5  | 0.001 | -10.55074679 | Down | 1.21E-10 | 1.82E-10 |
| novel_pir2163  | 44 | 0 | 1.5  | 0.001 | -10.55074679 | Down | 1.21E-10 | 1.82E-10 |
| novel_pir94    | 44 | 0 | 1.5  | 0.001 | -10.55074679 | Down | 1.21E-10 | 1.82E-10 |
| novel_pir1570  | 44 | 0 | 1.5  | 0.001 | -10.55074679 | Down | 1.21E-10 | 1.82E-10 |
| novel_pir1396  | 44 | 0 | 1.5  | 0.001 | -10.55074679 | Down | 1.21E-10 | 1.82E-10 |
| novel_pir134   | 43 | 0 | 1.46 | 0.001 | -10.51175265 | Down | 2.04E-10 | 3.03E-10 |
| novel_pir2472  | 43 | 0 | 1.46 | 0.001 | -10.51175265 | Down | 2.04E-10 | 3.03E-10 |
| novel_pir385   | 43 | 0 | 1.46 | 0.001 | -10.51175265 | Down | 2.04E-10 | 3.03E-10 |
| novel_pir1781  | 43 | 0 | 1.46 | 0.001 | -10.51175265 | Down | 2.04E-10 | 3.02E-10 |
| novel_pir1713  | 43 | 0 | 1.46 | 0.001 | -10.51175265 | Down | 2.04E-10 | 3.02E-10 |
| novel_pir1687  | 42 | 0 | 1.43 | 0.001 | -10.48179943 | Down | 3.45E-10 | 5.09E-10 |
| novel_pir2294  | 42 | 0 | 1.43 | 0.001 | -10.48179943 | Down | 3.45E-10 | 5.09E-10 |

|                |    |   |      |       |              |      |          |          |
|----------------|----|---|------|-------|--------------|------|----------|----------|
| novel_pir592   | 42 | 0 | 1.43 | 0.001 | -10.48179943 | Down | 3.45E-10 | 5.09E-10 |
| novel_pir1168  | 42 | 0 | 1.43 | 0.001 | -10.48179943 | Down | 3.45E-10 | 5.08E-10 |
| novel_pir1972  | 42 | 0 | 1.43 | 0.001 | -10.48179943 | Down | 3.45E-10 | 5.08E-10 |
| novel_pir1703  | 41 | 0 | 1.4  | 0.001 | -10.45121111 | Down | 5.81E-10 | 8.45E-10 |
| novel_pir847   | 41 | 0 | 1.4  | 0.001 | -10.45121111 | Down | 5.81E-10 | 8.44E-10 |
| novel_pir1760  | 41 | 0 | 1.4  | 0.001 | -10.45121111 | Down | 5.81E-10 | 8.44E-10 |
| novel_pir1069  | 41 | 0 | 1.4  | 0.001 | -10.45121111 | Down | 5.81E-10 | 8.43E-10 |
| novel_pir1280  | 41 | 0 | 1.4  | 0.001 | -10.45121111 | Down | 5.81E-10 | 8.42E-10 |
| novel_pir813   | 40 | 0 | 1.36 | 0.001 | -10.40939094 | Down | 9.80E-10 | 1.41E-09 |
| novel_pir2132  | 40 | 0 | 1.36 | 0.001 | -10.40939094 | Down | 9.80E-10 | 1.40E-09 |
| novel_pir923   | 40 | 0 | 1.36 | 0.001 | -10.40939094 | Down | 9.80E-10 | 1.40E-09 |
| novel_pir1613  | 40 | 0 | 1.36 | 0.001 | -10.40939094 | Down | 9.80E-10 | 1.40E-09 |
| novel_pir1672  | 40 | 0 | 1.36 | 0.001 | -10.40939094 | Down | 9.80E-10 | 1.40E-09 |
| novel_pir62    | 39 | 0 | 1.33 | 0.001 | -10.37721053 | Down | 1.65E-09 | 2.36E-09 |
| novel_pir2322  | 39 | 0 | 1.33 | 0.001 | -10.37721053 | Down | 1.65E-09 | 2.36E-09 |
| novel_pir1724  | 39 | 0 | 1.33 | 0.001 | -10.37721053 | Down | 1.65E-09 | 2.36E-09 |
| novel_pir61    | 39 | 0 | 1.33 | 0.001 | -10.37721053 | Down | 1.65E-09 | 2.36E-09 |
| novel_pir2221  | 39 | 0 | 1.33 | 0.001 | -10.37721053 | Down | 1.65E-09 | 2.35E-09 |
| novel_pir848   | 38 | 0 | 1.29 | 0.001 | -10.33315535 | Down | 2.79E-09 | 3.94E-09 |
| novel_pir2115  | 38 | 0 | 1.29 | 0.001 | -10.33315535 | Down | 2.79E-09 | 3.93E-09 |
| novel_pir829   | 37 | 0 | 1.26 | 0.001 | -10.29920802 | Down | 4.71E-09 | 6.63E-09 |
| novel_pir1988  | 37 | 0 | 1.26 | 0.001 | -10.29920802 | Down | 4.71E-09 | 6.63E-09 |
| novel_pir1253  | 36 | 0 | 1.23 | 0.001 | -10.2644426  | Down | 7.94E-09 | 1.11E-08 |
| novel_pir993   | 36 | 0 | 1.23 | 0.001 | -10.2644426  | Down | 7.94E-09 | 1.11E-08 |
| novel_pir2317  | 36 | 0 | 1.23 | 0.001 | -10.2644426  | Down | 7.94E-09 | 1.11E-08 |
| novel_pir1600  | 36 | 0 | 1.23 | 0.001 | -10.2644426  | Down | 7.94E-09 | 1.11E-08 |
| novel_pir252   | 35 | 0 | 1.19 | 0.001 | -10.21674586 | Down | 1.34E-08 | 1.84E-08 |
| novel_pir452   | 34 | 0 | 1.16 | 0.001 | -10.17990909 | Down | 2.26E-08 | 3.10E-08 |
| novel_pir309   | 34 | 0 | 1.16 | 0.001 | -10.17990909 | Down | 2.26E-08 | 3.10E-08 |
| novel_pir1652  | 34 | 0 | 1.16 | 0.001 | -10.17990909 | Down | 2.26E-08 | 3.10E-08 |
| novel_pir1819  | 34 | 0 | 1.16 | 0.001 | -10.17990909 | Down | 2.26E-08 | 3.10E-08 |
| novel_pir1082  | 33 | 0 | 1.12 | 0.001 | -10.12928302 | Down | 3.81E-08 | 5.15E-08 |
| mmu_pir_032974 | 33 | 0 | 1.12 | 0.001 | -10.12928302 | Down | 3.81E-08 | 5.14E-08 |
| novel_pir1298  | 33 | 0 | 1.12 | 0.001 | -10.12928302 | Down | 3.81E-08 | 5.14E-08 |
| novel_pir529   | 33 | 0 | 1.12 | 0.001 | -10.12928302 | Down | 3.81E-08 | 5.14E-08 |
| novel_pir934   | 33 | 0 | 1.12 | 0.001 | -10.12928302 | Down | 3.81E-08 | 5.13E-08 |

|               |    |   |      |       |              |      |          |          |
|---------------|----|---|------|-------|--------------|------|----------|----------|
| novel_pir1512 | 32 | 0 | 1.09 | 0.001 | -10.09011242 | Down | 6.43E-08 | 8.65E-08 |
| novel_pir893  | 32 | 0 | 1.09 | 0.001 | -10.09011242 | Down | 6.43E-08 | 8.64E-08 |
| novel_pir414  | 31 | 0 | 1.06 | 0.001 | -10.04984855 | Down | 1.08E-07 | 1.44E-07 |
| novel_pir331  | 30 | 0 | 1.02 | 0.001 | -9.994353437 | Down | 1.83E-07 | 2.42E-07 |
| novel_pir1742 | 30 | 0 | 1.02 | 0.001 | -9.994353437 | Down | 1.83E-07 | 2.42E-07 |
| novel_pir1330 | 29 | 0 | 0.99 | 0.001 | -9.951284715 | Down | 3.08E-07 | 4.01E-07 |
| novel_pir2359 | 29 | 0 | 0.99 | 0.001 | -9.951284715 | Down | 3.08E-07 | 4.01E-07 |
| novel_pir2016 | 28 | 0 | 0.95 | 0.001 | -9.891783703 | Down | 5.20E-07 | 6.66E-07 |
| novel_pir976  | 28 | 0 | 0.95 | 0.001 | -9.891783703 | Down | 5.20E-07 | 6.65E-07 |
| novel_pir602  | 28 | 0 | 0.95 | 0.001 | -9.891783703 | Down | 5.20E-07 | 6.65E-07 |
| novel_pir256  | 28 | 0 | 0.95 | 0.001 | -9.891783703 | Down | 5.20E-07 | 6.64E-07 |
| novel_pir650  | 27 | 0 | 0.92 | 0.001 | -9.845490051 | Down | 8.77E-07 | 1.12E-06 |
| novel_pir272  | 27 | 0 | 0.92 | 0.001 | -9.845490051 | Down | 8.77E-07 | 1.12E-06 |
| novel_pir1891 | 27 | 0 | 0.92 | 0.001 | -9.845490051 | Down | 8.77E-07 | 1.12E-06 |
| novel_pir1249 | 27 | 0 | 0.92 | 0.001 | -9.845490051 | Down | 8.77E-07 | 1.12E-06 |
| novel_pir623  | 26 | 0 | 0.89 | 0.001 | -9.797661526 | Down | 1.48E-06 | 1.86E-06 |
| novel_pir626  | 26 | 0 | 0.89 | 0.001 | -9.797661526 | Down | 1.48E-06 | 1.86E-06 |
| novel_pir857  | 26 | 0 | 0.89 | 0.001 | -9.797661526 | Down | 1.48E-06 | 1.86E-06 |
| novel_pir1849 | 26 | 0 | 0.89 | 0.001 | -9.797661526 | Down | 1.48E-06 | 1.85E-06 |
| novel_pir869  | 26 | 0 | 0.89 | 0.001 | -9.797661526 | Down | 1.48E-06 | 1.85E-06 |
| novel_pir1305 | 26 | 0 | 0.89 | 0.001 | -9.797661526 | Down | 1.48E-06 | 1.85E-06 |
| novel_pir461  | 26 | 0 | 0.89 | 0.001 | -9.797661526 | Down | 1.48E-06 | 1.85E-06 |
| novel_pir1527 | 26 | 0 | 0.89 | 0.001 | -9.797661526 | Down | 1.48E-06 | 1.85E-06 |
| novel_pir1663 | 26 | 0 | 0.89 | 0.001 | -9.797661526 | Down | 1.48E-06 | 1.85E-06 |
| novel_pir691  | 25 | 0 | 0.85 | 0.001 | -9.731319031 | Down | 2.50E-06 | 3.12E-06 |
| novel_pir2070 | 25 | 0 | 0.85 | 0.001 | -9.731319031 | Down | 2.50E-06 | 3.11E-06 |
| novel_pir383  | 25 | 0 | 0.85 | 0.001 | -9.731319031 | Down | 2.50E-06 | 3.11E-06 |
| novel_pir188  | 25 | 0 | 0.85 | 0.001 | -9.731319031 | Down | 2.50E-06 | 3.11E-06 |
| novel_pir2073 | 24 | 0 | 0.82 | 0.001 | -9.6794801   | Down | 4.21E-06 | 5.16E-06 |
| novel_pir384  | 24 | 0 | 0.82 | 0.001 | -9.6794801   | Down | 4.21E-06 | 5.15E-06 |
| novel_pir1617 | 24 | 0 | 0.82 | 0.001 | -9.6794801   | Down | 4.21E-06 | 5.15E-06 |
| novel_pir1580 | 24 | 0 | 0.82 | 0.001 | -9.6794801   | Down | 4.21E-06 | 5.15E-06 |
| novel_pir865  | 24 | 0 | 0.82 | 0.001 | -9.6794801   | Down | 4.21E-06 | 5.14E-06 |
| novel_pir1778 | 24 | 0 | 0.82 | 0.001 | -9.6794801   | Down | 4.21E-06 | 5.14E-06 |
| novel_pir2323 | 24 | 0 | 0.82 | 0.001 | -9.6794801   | Down | 4.21E-06 | 5.14E-06 |
| novel_pir50   | 24 | 0 | 0.82 | 0.001 | -9.6794801   | Down | 4.21E-06 | 5.13E-06 |



|               |    |   |      |       |              |      |            |             |
|---------------|----|---|------|-------|--------------|------|------------|-------------|
| novel_pir1273 | 23 | 0 | 0.78 | 0.001 | -9.607330314 | Down | 7.10E-06   | 8.44E-06    |
| novel_pir259  | 23 | 0 | 0.78 | 0.001 | -9.607330314 | Down | 7.10E-06   | 8.43E-06    |
| novel_pir1250 | 23 | 0 | 0.78 | 0.001 | -9.607330314 | Down | 7.10E-06   | 8.42E-06    |
| novel_pir1905 | 23 | 0 | 0.78 | 0.001 | -9.607330314 | Down | 7.10E-06   | 8.42E-06    |
| novel_pir1244 | 22 | 0 | 0.75 | 0.001 | -9.550746785 | Down | 1.20E-05   | 1.42E-05    |
| novel_pir2394 | 22 | 0 | 0.75 | 0.001 | -9.550746785 | Down | 1.20E-05   | 1.42E-05    |
| novel_pir1746 | 22 | 0 | 0.75 | 0.001 | -9.550746785 | Down | 1.20E-05   | 1.42E-05    |
| novel_pir1820 | 22 | 0 | 0.75 | 0.001 | -9.550746785 | Down | 1.20E-05   | 1.42E-05    |
| novel_pir939  | 22 | 0 | 0.75 | 0.001 | -9.550746785 | Down | 1.20E-05   | 1.42E-05    |
| novel_pir200  | 22 | 0 | 0.75 | 0.001 | -9.550746785 | Down | 1.20E-05   | 1.41E-05    |
| novel_pir2384 | 22 | 0 | 0.75 | 0.001 | -9.550746785 | Down | 1.20E-05   | 1.41E-05    |
| novel_pir1106 | 21 | 0 | 0.72 | 0.001 | -9.491853096 | Down | 2.02E-05   | 2.33E-05    |
| novel_pir326  | 21 | 0 | 0.72 | 0.001 | -9.491853096 | Down | 2.02E-05   | 2.33E-05    |
| novel_pir320  | 21 | 0 | 0.72 | 0.001 | -9.491853096 | Down | 2.02E-05   | 2.33E-05    |
| novel_pir753  | 21 | 0 | 0.72 | 0.001 | -9.491853096 | Down | 2.02E-05   | 2.32E-05    |
| novel_pir2311 | 21 | 0 | 0.72 | 0.001 | -9.491853096 | Down | 2.02E-05   | 2.32E-05    |
| novel_pir2056 | 20 | 0 | 0.68 | 0.001 | -9.409390936 | Down | 3.41E-05   | 3.92E-05    |
| novel_pir2362 | 20 | 0 | 0.68 | 0.001 | -9.409390936 | Down | 3.41E-05   | 3.91E-05    |
| novel_pir908  | 20 | 0 | 0.68 | 0.001 | -9.409390936 | Down | 3.41E-05   | 3.91E-05    |
| novel_pir714  | 19 | 0 | 0.65 | 0.001 | -9.344295908 | Down | 5.75E-05   | 6.41E-05    |
| novel_pir2339 | 19 | 0 | 0.65 | 0.001 | -9.344295908 | Down | 5.75E-05   | 6.40E-05    |
| novel_pir1003 | 19 | 0 | 0.65 | 0.001 | -9.344295908 | Down | 5.75E-05   | 6.40E-05    |
| novel_pir45   | 19 | 0 | 0.65 | 0.001 | -9.344295908 | Down | 5.75E-05   | 6.40E-05    |
| novel_pir1757 | 19 | 0 | 0.65 | 0.001 | -9.344295908 | Down | 5.75E-05   | 6.39E-05    |
| novel_pir1134 | 19 | 0 | 0.65 | 0.001 | -9.344295908 | Down | 5.75E-05   | 6.39E-05    |
| novel_pir410  | 19 | 0 | 0.65 | 0.001 | -9.344295908 | Down | 5.75E-05   | 6.39E-05    |
| novel_pir1401 | 19 | 0 | 0.65 | 0.001 | -9.344295908 | Down | 5.75E-05   | 6.38E-05    |
| novel_pir2149 | 18 | 0 | 0.61 | 0.001 | -9.252665432 | Down | 9.70E-05   | 0.000107525 |
| novel_pir1836 | 18 | 0 | 0.61 | 0.001 | -9.252665432 | Down | 9.70E-05   | 0.000107463 |
| novel_pir2215 | 18 | 0 | 0.61 | 0.001 | -9.252665432 | Down | 9.70E-05   | 0.000107401 |
| novel_pir652  | 17 | 0 | 0.58 | 0.001 | -9.17990909  | Down | 0.00016363 | 0.000173987 |
| novel_pir2189 | 17 | 0 | 0.58 | 0.001 | -9.17990909  | Down | 0.00016363 | 0.000173891 |
| novel_pir255  | 17 | 0 | 0.58 | 0.001 | -9.17990909  | Down | 0.00016363 | 0.000173795 |
| novel_pir1409 | 17 | 0 | 0.58 | 0.001 | -9.17990909  | Down | 0.00016363 | 0.0001737   |
| novel_pir1614 | 17 | 0 | 0.58 | 0.001 | -9.17990909  | Down | 0.00016363 | 0.000173605 |
| novel_pir302  | 17 | 0 | 0.58 | 0.001 | -9.17990909  | Down | 0.00016363 | 0.000173509 |

|                |      |    |        |       |              |      |             |             |
|----------------|------|----|--------|-------|--------------|------|-------------|-------------|
| novel_pir873   | 17   | 0  | 0.58   | 0.001 | -9.17990909  | Down | 0.00016363  | 0.000173414 |
| novel_pir1356  | 17   | 0  | 0.58   | 0.001 | -9.17990909  | Down | 0.00016363  | 0.000173319 |
| novel_pir1576  | 17   | 0  | 0.58   | 0.001 | -9.17990909  | Down | 0.00016363  | 0.000173224 |
| novel_pir647   | 17   | 0  | 0.58   | 0.001 | -9.17990909  | Down | 0.00016363  | 0.000173129 |
| novel_pir2234  | 17   | 0  | 0.58   | 0.001 | -9.17990909  | Down | 0.00016363  | 0.000173034 |
| novel_pir44    | 16   | 0  | 0.54   | 0.001 | -9.076815597 | Down | 0.000276012 | 0.000291556 |
| novel_pir454   | 16   | 0  | 0.54   | 0.001 | -9.076815597 | Down | 0.000276012 | 0.000291396 |
| novel_pir1743  | 16   | 0  | 0.54   | 0.001 | -9.076815597 | Down | 0.000276012 | 0.000291237 |
| novel_pir1176  | 16   | 0  | 0.54   | 0.001 | -9.076815597 | Down | 0.000276012 | 0.000291078 |
| novel_pir1054  | 16   | 0  | 0.54   | 0.001 | -9.076815597 | Down | 0.000276012 | 0.000290919 |
| novel_pir1685  | 16   | 0  | 0.54   | 0.001 | -9.076815597 | Down | 0.000276012 | 0.000290761 |
| novel_pir1756  | 16   | 0  | 0.54   | 0.001 | -9.076815597 | Down | 0.000276012 | 0.000290602 |
| novel_pir1779  | 16   | 0  | 0.54   | 0.001 | -9.076815597 | Down | 0.000276012 | 0.000290444 |
| novel_pir2064  | 16   | 0  | 0.54   | 0.001 | -9.076815597 | Down | 0.000276012 | 0.000290286 |
| novel_pir812   | 16   | 0  | 0.54   | 0.001 | -9.076815597 | Down | 0.000276012 | 0.000290128 |
| novel_pir594   | 15   | 0  | 0.51   | 0.001 | -8.994353437 | Down | 0.000465578 | 0.000488857 |
| novel_pir1104  | 15   | 0  | 0.51   | 0.001 | -8.994353437 | Down | 0.000465578 | 0.000488591 |
| novel_pir1428  | 15   | 0  | 0.51   | 0.001 | -8.994353437 | Down | 0.000465578 | 0.000488326 |
| novel_pir1471  | 15   | 0  | 0.51   | 0.001 | -8.994353437 | Down | 0.000465578 | 0.000488061 |
| novel_pir359   | 14   | 0  | 0.48   | 0.001 | -8.906890596 | Down | 0.00078534  | 0.000821927 |
| novel_pir2358  | 14   | 0  | 0.48   | 0.001 | -8.906890596 | Down | 0.00078534  | 0.000821482 |
| novel_pir1350  | 14   | 0  | 0.48   | 0.001 | -8.906890596 | Down | 0.00078534  | 0.000821037 |
| novel_pir2182  | 14   | 0  | 0.48   | 0.001 | -8.906890596 | Down | 0.00078534  | 0.000820593 |
| novel_pir1892  | 14   | 0  | 0.48   | 0.001 | -8.906890596 | Down | 0.00078534  | 0.00082015  |
| novel_pir1053  | 14   | 0  | 0.48   | 0.001 | -8.906890596 | Down | 0.00078534  | 0.000819707 |
| novel_pir932   | 14   | 0  | 0.48   | 0.001 | -8.906890596 | Down | 0.00078534  | 0.000819264 |
| mmu_piR_024749 | 1110 | 2  | 37.8   | 0.1   | -8.562242424 | Down | 1.11E-247   | 8.56E-246   |
| novel_pir231   | 3004 | 10 | 102.3  | 0.5   | -7.676662335 | Down | 0           | 0           |
| novel_pir399   | 6067 | 29 | 206.61 | 1.44  | -7.164697461 | Down | 0           | 0           |
| novel_pir807   | 1826 | 13 | 62.18  | 0.64  | -6.602234901 | Down | 0           | 0           |
| mmu_piR_010309 | 1894 | 16 | 64.5   | 0.79  | -6.351302697 | Down | 0           | 0           |
| novel_pir613   | 1945 | 20 | 66.24  | 0.99  | -6.064130337 | Down | 0           | 0           |
| mmu_piR_023189 | 3681 | 42 | 125.36 | 2.08  | -5.913349746 | Down | 0           | 0           |
| novel_pir1720  | 949  | 11 | 32.32  | 0.55  | -5.876851769 | Down | 3.08E-195   | 1.92E-193   |
| novel_pir398   | 2111 | 33 | 71.89  | 1.64  | -5.454023384 | Down | 0           | 0           |
| novel_pir1272  | 2888 | 47 | 98.35  | 2.33  | -5.399523193 | Down | 0           | 0           |

|                |       |      |         |        |              |      |           |           |
|----------------|-------|------|---------|--------|--------------|------|-----------|-----------|
| novel_pir2416  | 697   | 12   | 23.74   | 0.6    | -5.306213624 | Down | 4.29E-138 | 1.48E-136 |
| novel_pir984   | 3461  | 62   | 117.87  | 3.07   | -5.262814108 | Down | 0         | 0         |
| novel_pir133   | 1144  | 22   | 38.96   | 1.09   | -5.159593637 | Down | 1.19E-222 | 8.24E-221 |
| novel_pir274   | 1281  | 26   | 43.62   | 1.29   | -5.079546799 | Down | 2.45E-247 | 1.82E-245 |
| mmu_piR_002962 | 388   | 9    | 13.21   | 0.45   | -4.875561655 | Down | 1.88E-74  | 1.14E-73  |
| novel_pir287   | 574   | 14   | 19.55   | 0.69   | -4.824428435 | Down | 1.16E-108 | 2.58E-107 |
| novel_pir806   | 1617  | 41   | 55.07   | 2.03   | -4.761714976 | Down | 1.58E-301 | 1.39E-299 |
| mmu_piR_017405 | 802   | 21   | 27.31   | 1.04   | -4.714773881 | Down | 1.60E-149 | 6.45E-148 |
| novel_pir155   | 1175  | 32   | 40.01   | 1.59   | -4.653261958 | Down | 6.75E-217 | 4.49E-215 |
| novel_pir717   | 2955  | 84   | 100.63  | 4.17   | -4.592869274 | Down | 0         | 0         |
| mmu_piR_013763 | 303   | 9    | 10.32   | 0.45   | -4.519374159 | Down | 4.27E-56  | 1.56E-55  |
| novel_pir1609  | 333   | 11   | 11.34   | 0.55   | -4.365845211 | Down | 2.72E-60  | 1.11E-59  |
| novel_pir945   | 377   | 13   | 12.84   | 0.64   | -4.326429487 | Down | 1.72E-67  | 8.58E-67  |
| novel_pir149   | 370   | 14   | 12.6    | 0.69   | -4.190683562 | Down | 5.93E-65  | 2.73E-64  |
| novel_pir2420  | 453   | 18   | 15.43   | 0.89   | -4.115788916 | Down | 2.50E-78  | 1.75E-77  |
| novel_pir334   | 294   | 13   | 10.01   | 0.64   | -3.967226259 | Down | 5.22E-50  | 1.64E-49  |
| novel_pir1601  | 569   | 25   | 19.38   | 1.24   | -3.966156545 | Down | 1.25E-95  | 1.82E-94  |
| novel_pir1914  | 3286  | 149  | 111.91  | 7.39   | -3.920620783 | Down | 0         | 0         |
| novel_pir145   | 1029  | 47   | 35.04   | 2.33   | -3.910600915 | Down | 5.92E-170 | 3.01E-168 |
| novel_pir2033  | 879   | 44   | 29.93   | 2.18   | -3.779192239 | Down | 9.11E-142 | 3.39E-140 |
| novel_pir2385  | 735   | 37   | 25.03   | 1.83   | -3.773742737 | Down | 1.32E-118 | 3.80E-117 |
| novel_pir719   | 565   | 31   | 19.24   | 1.54   | -3.643106543 | Down | 3.29E-89  | 3.69E-88  |
| mmu_piR_031448 | 65076 | 3863 | 2216.18 | 191.55 | -3.532282132 | Down | 0         | 0         |
| novel_pir277   | 357   | 22   | 12.16   | 1.09   | -3.479743189 | Down | 7.99E-55  | 2.84E-54  |
| novel_pir147   | 636   | 40   | 21.66   | 1.98   | -3.451460908 | Down | 7.84E-96  | 1.15E-94  |
| mmu_piR_028252 | 323   | 21   | 11      | 1.04   | -3.40284809  | Down | 7.87E-49  | 2.39E-48  |
| mmu_piR_016069 | 69    | 5    | 2.35    | 0.25   | -3.232660757 | Down | 5.47E-11  | 8.38E-11  |
| novel_pir142   | 1140  | 87   | 38.82   | 4.31   | -3.171040344 | Down | 2.52E-158 | 1.16E-156 |
| novel_pir2122  | 3899  | 315  | 132.78  | 15.62  | -3.087571498 | Down | 0         | 0         |
| novel_pir194   | 684   | 60   | 23.29   | 2.98   | -2.966326404 | Down | 5.70E-90  | 6.59E-89  |
| novel_pir2425  | 347   | 31   | 11.82   | 1.54   | -2.940227779 | Down | 5.25E-46  | 1.53E-45  |
| novel_pir928   | 124   | 11   | 4.22    | 0.55   | -2.939739475 | Down | 2.35E-17  | 4.25E-17  |
| novel_pir459   | 219   | 21   | 7.46    | 1.04   | -2.842592102 | Down | 1.38E-28  | 2.99E-28  |
| novel_pir2422  | 313   | 31   | 10.66   | 1.54   | -2.791205182 | Down | 1.34E-39  | 3.46E-39  |
| novel_pir2035  | 149   | 15   | 5.07    | 0.74   | -2.776388571 | Down | 2.07E-19  | 3.86E-19  |
| novel_pir1591  | 446   | 48   | 15.19   | 2.38   | -2.674088391 | Down | 2.34E-53  | 8.03E-53  |

|                |      |      |        |       |              |      |          |          |
|----------------|------|------|--------|-------|--------------|------|----------|----------|
| novel pir608   | 295  | 33   | 10.05  | 1.64  | -2.615427781 | Down | 4.97E-35 | 1.21E-34 |
| novel pir1696  | 572  | 67   | 19.48  | 3.32  | -2.552738531 | Down | 1.06E-64 | 4.83E-64 |
| novel pir2468  | 459  | 57   | 15.63  | 2.83  | -2.46544382  | Down | 2.30E-50 | 7.25E-50 |
| mmu piR 000691 | 318  | 41   | 10.83  | 2.03  | -2.41548161  | Down | 1.63E-34 | 3.95E-34 |
| novel pir296   | 569  | 84   | 19.38  | 4.17  | -2.216449282 | Down | 5.85E-55 | 2.10E-54 |
| mmu piR 020120 | 633  | 94   | 21.56  | 4.66  | -2.209955318 | Down | 1.10E-60 | 4.55E-60 |
| novel pir153   | 66   | 10   | 2.25   | 0.5   | -2.169925001 | Down | 2.12E-07 | 2.77E-07 |
| novel pir718   | 781  | 138  | 26.6   | 6.84  | -1.959358016 | Down | 2.97E-64 | 1.33E-63 |
| novel pir2040  | 539  | 105  | 18.36  | 5.21  | -1.817210781 | Down | 8.56E-41 | 2.26E-40 |
| novel pir1452  | 688  | 137  | 23.43  | 6.79  | -1.786873475 | Down | 1.87E-50 | 5.93E-50 |
| mmu piR 025576 | 7161 | 1453 | 243.87 | 72.05 | -1.759041958 | Down | 0        | 0        |
| novel pir290   | 88   | 20   | 3      | 0.99  | -1.59946207  | Down | 1.02E-06 | 1.30E-06 |
| novel pir336   | 452  | 107  | 15.39  | 5.31  | -1.535209466 | Down | 1.34E-27 | 2.85E-27 |
| novel pir2246  | 118  | 28   | 4.02   | 1.39  | -1.532110618 | Down | 3.44E-08 | 4.65E-08 |
| novel pir148   | 67   | 17   | 2.28   | 0.84  | -1.440572591 | Down | 8.23E-05 | 9.13E-05 |
