# Supplementary material for: Pathogenic Effects and Potential Regulatory Mechanisms of Tea Polyphenols on Obesity
Source: Hindawi journal article supplement (doi:10.1155/2019/2579734), 2019-06-11
Supplement: f4 [file 2579734.f4.pdf]

| miRNA id       | Count (DUI4) | Count (XIA01) | TPM (DUI4) | TPM (XIA01) | log2 Ratio (XIA01/DUI4) | Up-Down-Regulation (XIA01/DUI4) | P-value   | FDR       |
|----------------|--------------|---------------|------------|-------------|-------------------------|---------------------------------|-----------|-----------|
| novel_pir2005  | 0            | 960           | 0.001      | 24.03       | 14.55254903             | Up                              | 2.09E-230 | 8.03E-229 |
| novel_pir1997  | 0            | 456           | 0.001      | 11.41       | 13.47801117             | Up                              | 8.60E-110 | 4.36E-109 |
| novel_pir2418  | 0            | 362           | 0.001      | 9.06        | 13.14529533             | Up                              | 2.69E-87  | 9.49E-87  |
| novel_pir2004  | 0            | 237           | 0.001      | 5.93        | 12.53381639             | Up                              | 2.21E-57  | 5.73E-57  |
| novel_pir2419  | 0            | 167           | 0.001      | 4.18        | 12.02928723             | Up                              | 1.25E-40  | 2.80E-40  |
| novel_pir1451  | 0            | 148           | 0.001      | 3.7         | 11.85330956             | Up                              | 4.40E-36  | 9.58E-36  |
| novel_pir610   | 0            | 144           | 0.001      | 3.6         | 11.81378119             | Up                              | 3.99E-35  | 8.62E-35  |
| novel_pir1456  | 0            | 126           | 0.001      | 3.15        | 11.62113611             | Up                              | 8.09E-31  | 1.70E-30  |
| novel_pir1653  | 0            | 118           | 0.001      | 2.95        | 11.52649924             | Up                              | 6.65E-29  | 1.37E-28  |
| novel_pir1608  | 0            | 116           | 0.001      | 2.9         | 11.50183718             | Up                              | 2.00E-28  | 4.13E-28  |
| novel_pir2006  | 0            | 112           | 0.001      | 2.8         | 11.45121111             | Up                              | 1.81E-27  | 3.71E-27  |
| mmu_piR_002643 | 0            | 108           | 0.001      | 2.7         | 11.39874369             | Up                              | 1.64E-26  | 3.32E-26  |
| novel_pir2414  | 0            | 105           | 0.001      | 2.63        | 11.36084708             | Up                              | 8.59E-26  | 1.73E-25  |
| novel_pir117   | 0            | 96            | 0.001      | 2.4         | 11.22881869             | Up                              | 1.22E-23  | 2.42E-23  |
| novel_pir2415  | 0            | 96            | 0.001      | 2.4         | 11.22881869             | Up                              | 1.22E-23  | 2.42E-23  |
| novel_pir2000  | 0            | 89            | 0.001      | 2.23        | 11.12282799             | Up                              | 5.79E-22  | 1.13E-21  |
| novel_pir169   | 0            | 87            | 0.001      | 2.18        | 11.09011242             | Up                              | 1.74E-21  | 3.38E-21  |
| novel_pir2003  | 0            | 84            | 0.001      | 2.1         | 11.03617361             | Up                              | 9.11E-21  | 1.74E-20  |
| novel_pir854   | 0            | 83            | 0.001      | 2.08        | 11.02236781             | Up                              | 1.58E-20  | 3.01E-20  |
| mmu_piR_002435 | 0            | 78            | 0.001      | 1.95        | 10.92925841             | Up                              | 2.48E-19  | 4.69E-19  |
| novel_pir2436  | 0            | 76            | 0.001      | 1.9         | 10.8917837              | Up                              | 7.48E-19  | 1.40E-18  |
| novel_pir2036  | 0            | 75            | 0.001      | 1.88        | 10.87651695             | Up                              | 1.30E-18  | 2.43E-18  |
| novel_pir172   | 0            | 72            | 0.001      | 1.8         | 10.81378119             | Up                              | 6.78E-18  | 1.26E-17  |
| novel_pir2296  | 0            | 71            | 0.001      | 1.78        | 10.79766153             | Up                              | 1.18E-17  | 2.18E-17  |
| novel_pir1455  | 0            | 69            | 0.001      | 1.73        | 10.75655632             | Up                              | 3.54E-17  | 6.50E-17  |
| mmu_piR_028975 | 0            | 68            | 0.001      | 1.7         | 10.73131903             | Up                              | 6.14E-17  | 1.13E-16  |
| novel_pir2007  | 0            | 66            | 0.001      | 1.65        | 10.68825031             | Up                              | 1.85E-16  | 3.35E-16  |
| novel_pir2424  | 0            | 62            | 0.001      | 1.55        | 10.5980525              | Up                              | 1.68E-15  | 3.01E-15  |
| novel_pir2413  | 0            | 60            | 0.001      | 1.5         | 10.55074679             | Up                              | 5.05E-15  | 9.00E-15  |
| novel_pir1668  | 0            | 59            | 0.001      | 1.48        | 10.53138146             | Up                              | 8.75E-15  | 1.56E-14  |
| novel_pir514   | 0            | 58            | 0.001      | 1.45        | 10.50183718             | Up                              | 1.52E-14  | 2.69E-14  |
| novel_pir1604  | 0            | 55            | 0.001      | 1.38        | 10.43045255             | Up                              | 7.93E-14  | 1.40E-13  |

|                |   |    |       |      |             |    |          |          |
|----------------|---|----|-------|------|-------------|----|----------|----------|
| novel_pir2412  | 0 | 54 | 0.001 | 1.35 | 10.39874369 | Up | 1.38E-13 | 2.42E-13 |
| novel_pir2417  | 0 | 53 | 0.001 | 1.33 | 10.37721053 | Up | 2.39E-13 | 4.18E-13 |
| novel_pir417   | 0 | 52 | 0.001 | 1.3  | 10.34429591 | Up | 4.14E-13 | 7.25E-13 |
| novel_pir1557  | 0 | 52 | 0.001 | 1.3  | 10.34429591 | Up | 4.14E-13 | 7.24E-13 |
| novel_pir2039  | 0 | 51 | 0.001 | 1.28 | 10.32192809 | Up | 7.19E-13 | 1.25E-12 |
| novel_pir1766  | 0 | 51 | 0.001 | 1.28 | 10.32192809 | Up | 7.19E-13 | 1.25E-12 |
| novel_pir2001  | 0 | 51 | 0.001 | 1.28 | 10.32192809 | Up | 7.19E-13 | 1.25E-12 |
| mmu_piR_000362 | 0 | 47 | 0.001 | 1.18 | 10.20457114 | Up | 6.52E-12 | 1.12E-11 |
| novel_pir2409  | 0 | 47 | 0.001 | 1.18 | 10.20457114 | Up | 6.52E-12 | 1.12E-11 |
| novel_pir295   | 0 | 47 | 0.001 | 1.18 | 10.20457114 | Up | 6.52E-12 | 1.12E-11 |
| novel_pir144   | 0 | 45 | 0.001 | 1.13 | 10.14210706 | Up | 1.96E-11 | 3.37E-11 |
| novel_pir2002  | 0 | 45 | 0.001 | 1.13 | 10.14210706 | Up | 1.96E-11 | 3.37E-11 |
| novel_pir2387  | 0 | 45 | 0.001 | 1.13 | 10.14210706 | Up | 1.96E-11 | 3.36E-11 |
| novel_pir1446  | 0 | 45 | 0.001 | 1.13 | 10.14210706 | Up | 1.96E-11 | 3.36E-11 |
| novel_pir2410  | 0 | 44 | 0.001 | 1.1  | 10.10328781 | Up | 3.40E-11 | 5.80E-11 |
| novel_pir1996  | 0 | 44 | 0.001 | 1.1  | 10.10328781 | Up | 3.40E-11 | 5.80E-11 |
| mmu_piR_038428 | 0 | 43 | 0.001 | 1.08 | 10.0768156  | Up | 5.91E-11 | 1.00E-10 |
| novel_pir1998  | 0 | 43 | 0.001 | 1.08 | 10.0768156  | Up | 5.91E-11 | 1.00E-10 |
| mmu_piR_000536 | 0 | 42 | 0.001 | 1.05 | 10.03617361 | Up | 1.02E-10 | 1.73E-10 |
| novel_pir850   | 0 | 42 | 0.001 | 1.05 | 10.03617361 | Up | 1.02E-10 | 1.73E-10 |
| novel_pir531   | 0 | 42 | 0.001 | 1.05 | 10.03617361 | Up | 1.02E-10 | 1.73E-10 |
| novel_pir570   | 0 | 41 | 0.001 | 1.03 | 10.00842862 | Up | 1.78E-10 | 2.97E-10 |
| novel_pir1999  | 0 | 41 | 0.001 | 1.03 | 10.00842862 | Up | 1.78E-10 | 2.97E-10 |
| novel_pir2403  | 0 | 39 | 0.001 | 0.98 | 9.936637939 | Up | 5.35E-10 | 8.91E-10 |
| novel_pir2398  | 0 | 39 | 0.001 | 0.98 | 9.936637939 | Up | 5.35E-10 | 8.90E-10 |
| novel_pir1448  | 0 | 39 | 0.001 | 0.98 | 9.936637939 | Up | 5.35E-10 | 8.89E-10 |
| novel_pir1702  | 0 | 39 | 0.001 | 0.98 | 9.936637939 | Up | 5.35E-10 | 8.88E-10 |
| novel_pir2421  | 0 | 39 | 0.001 | 0.98 | 9.936637939 | Up | 5.35E-10 | 8.87E-10 |
| novel_pir116   | 0 | 36 | 0.001 | 0.9  | 9.813781191 | Up | 2.80E-09 | 4.59E-09 |
| mmu_piR_011141 | 0 | 36 | 0.001 | 0.9  | 9.813781191 | Up | 2.80E-09 | 4.58E-09 |
| novel_pir2091  | 0 | 36 | 0.001 | 0.9  | 9.813781191 | Up | 2.80E-09 | 4.58E-09 |
| novel_pir43    | 0 | 35 | 0.001 | 0.88 | 9.781359714 | Up | 4.85E-09 | 7.94E-09 |
| novel_pir2404  | 0 | 35 | 0.001 | 0.88 | 9.781359714 | Up | 4.85E-09 | 7.93E-09 |
| novel_pir2406  | 0 | 34 | 0.001 | 0.85 | 9.731319031 | Up | 8.41E-09 | 1.37E-08 |
| novel_pir1539  | 0 | 34 | 0.001 | 0.85 | 9.731319031 | Up | 8.41E-09 | 1.37E-08 |
| novel_pir222   | 0 | 33 | 0.001 | 0.83 | 9.696967526 | Up | 1.46E-08 | 2.35E-08 |

|                |   |    |       |      |             |    |          |          |
|----------------|---|----|-------|------|-------------|----|----------|----------|
| novel_pir170   | 0 | 33 | 0.001 | 0.83 | 9.696967526 | Up | 1.46E-08 | 2.35E-08 |
| novel_pir113   | 0 | 33 | 0.001 | 0.83 | 9.696967526 | Up | 1.46E-08 | 2.35E-08 |
| novel_pir299   | 0 | 33 | 0.001 | 0.83 | 9.696967526 | Up | 1.46E-08 | 2.35E-08 |
| novel_pir1050  | 0 | 33 | 0.001 | 0.83 | 9.696967526 | Up | 1.46E-08 | 2.35E-08 |
| novel_pir894   | 0 | 32 | 0.001 | 0.8  | 9.64385619  | Up | 2.53E-08 | 4.07E-08 |
| novel_pir1588  | 0 | 32 | 0.001 | 0.8  | 9.64385619  | Up | 2.53E-08 | 4.06E-08 |
| novel_pir505   | 0 | 32 | 0.001 | 0.8  | 9.64385619  | Up | 2.53E-08 | 4.06E-08 |
| novel_pir864   | 0 | 31 | 0.001 | 0.78 | 9.607330314 | Up | 4.40E-08 | 7.02E-08 |
| novel_pir2011  | 0 | 31 | 0.001 | 0.78 | 9.607330314 | Up | 4.40E-08 | 7.02E-08 |
| novel_pir2109  | 0 | 30 | 0.001 | 0.75 | 9.550746785 | Up | 7.63E-08 | 1.21E-07 |
| novel_pir294   | 0 | 30 | 0.001 | 0.75 | 9.550746785 | Up | 7.63E-08 | 1.21E-07 |
| novel_pir2466  | 0 | 29 | 0.001 | 0.73 | 9.511752654 | Up | 1.32E-07 | 2.09E-07 |
| mmu_piR_004567 | 0 | 29 | 0.001 | 0.73 | 9.511752654 | Up | 1.32E-07 | 2.09E-07 |
| novel_pir1453  | 0 | 29 | 0.001 | 0.73 | 9.511752654 | Up | 1.32E-07 | 2.09E-07 |
| novel_pir1531  | 0 | 29 | 0.001 | 0.73 | 9.511752654 | Up | 1.32E-07 | 2.09E-07 |
| novel_pir217   | 0 | 29 | 0.001 | 0.73 | 9.511752654 | Up | 1.32E-07 | 2.09E-07 |
| novel_pir2408  | 0 | 28 | 0.001 | 0.7  | 9.451211112 | Up | 2.30E-07 | 3.61E-07 |
| novel_pir1584  | 0 | 28 | 0.001 | 0.7  | 9.451211112 | Up | 2.30E-07 | 3.60E-07 |
| novel_pir2017  | 0 | 27 | 0.001 | 0.68 | 9.409390936 | Up | 3.98E-07 | 6.19E-07 |
| novel_pir157   | 0 | 27 | 0.001 | 0.68 | 9.409390936 | Up | 3.98E-07 | 6.18E-07 |
| novel_pir1214  | 0 | 27 | 0.001 | 0.68 | 9.409390936 | Up | 3.98E-07 | 6.18E-07 |
| novel_pir1631  | 0 | 27 | 0.001 | 0.68 | 9.409390936 | Up | 3.98E-07 | 6.17E-07 |
| novel_pir642   | 0 | 26 | 0.001 | 0.65 | 9.344295908 | Up | 6.91E-07 | 1.07E-06 |
| novel_pir2301  | 0 | 26 | 0.001 | 0.65 | 9.344295908 | Up | 6.91E-07 | 1.07E-06 |
| novel_pir2155  | 0 | 26 | 0.001 | 0.65 | 9.344295908 | Up | 6.91E-07 | 1.07E-06 |
| novel_pir1123  | 0 | 26 | 0.001 | 0.65 | 9.344295908 | Up | 6.91E-07 | 1.07E-06 |
| novel_pir1030  | 0 | 26 | 0.001 | 0.65 | 9.344295908 | Up | 6.91E-07 | 1.07E-06 |
| novel_pir382   | 0 | 25 | 0.001 | 0.63 | 9.299208018 | Up | 1.20E-06 | 1.83E-06 |
| novel_pir609   | 0 | 25 | 0.001 | 0.63 | 9.299208018 | Up | 1.20E-06 | 1.83E-06 |
| novel_pir434   | 0 | 25 | 0.001 | 0.63 | 9.299208018 | Up | 1.20E-06 | 1.83E-06 |
| mmu_piR_024221 | 0 | 25 | 0.001 | 0.63 | 9.299208018 | Up | 1.20E-06 | 1.83E-06 |
| novel_pir1506  | 0 | 25 | 0.001 | 0.63 | 9.299208018 | Up | 1.20E-06 | 1.83E-06 |
| novel_pir898   | 0 | 25 | 0.001 | 0.63 | 9.299208018 | Up | 1.20E-06 | 1.82E-06 |
| novel_pir161   | 0 | 25 | 0.001 | 0.63 | 9.299208018 | Up | 1.20E-06 | 1.82E-06 |
| novel_pir733   | 0 | 25 | 0.001 | 0.63 | 9.299208018 | Up | 1.20E-06 | 1.82E-06 |
| novel_pir1486  | 0 | 24 | 0.001 | 0.6  | 9.22881869  | Up | 2.08E-06 | 3.16E-06 |

|                |   |    |       |      |             |    |          |          |
|----------------|---|----|-------|------|-------------|----|----------|----------|
| novel_pir646   | 0 | 24 | 0.001 | 0.6  | 9.22881869  | Up | 2.08E-06 | 3.16E-06 |
| novel_pir2351  | 0 | 24 | 0.001 | 0.6  | 9.22881869  | Up | 2.08E-06 | 3.15E-06 |
| novel_pir40    | 0 | 24 | 0.001 | 0.6  | 9.22881869  | Up | 2.08E-06 | 3.15E-06 |
| novel_pir1040  | 0 | 24 | 0.001 | 0.6  | 9.22881869  | Up | 2.08E-06 | 3.15E-06 |
| novel_pir1574  | 0 | 24 | 0.001 | 0.6  | 9.22881869  | Up | 2.08E-06 | 3.15E-06 |
| novel_pir936   | 0 | 24 | 0.001 | 0.6  | 9.22881869  | Up | 2.08E-06 | 3.14E-06 |
| novel_pir2202  | 0 | 24 | 0.001 | 0.6  | 9.22881869  | Up | 2.08E-06 | 3.14E-06 |
| novel_pir1371  | 0 | 24 | 0.001 | 0.6  | 9.22881869  | Up | 2.08E-06 | 3.14E-06 |
| novel_pir1940  | 0 | 24 | 0.001 | 0.6  | 9.22881869  | Up | 2.08E-06 | 3.14E-06 |
| novel_pir379   | 0 | 24 | 0.001 | 0.6  | 9.22881869  | Up | 2.08E-06 | 3.13E-06 |
| novel_pir1149  | 0 | 23 | 0.001 | 0.58 | 9.17990909  | Up | 3.61E-06 | 5.41E-06 |
| novel_pir305   | 0 | 23 | 0.001 | 0.58 | 9.17990909  | Up | 3.61E-06 | 5.40E-06 |
| novel_pir1765  | 0 | 23 | 0.001 | 0.58 | 9.17990909  | Up | 3.61E-06 | 5.40E-06 |
| novel_pir568   | 0 | 23 | 0.001 | 0.58 | 9.17990909  | Up | 3.61E-06 | 5.40E-06 |
| novel_pir441   | 0 | 23 | 0.001 | 0.58 | 9.17990909  | Up | 3.61E-06 | 5.39E-06 |
| novel_pir176   | 0 | 23 | 0.001 | 0.58 | 9.17990909  | Up | 3.61E-06 | 5.39E-06 |
| mmu_piR_012500 | 0 | 23 | 0.001 | 0.58 | 9.17990909  | Up | 3.61E-06 | 5.38E-06 |
| novel_pir1645  | 0 | 23 | 0.001 | 0.58 | 9.17990909  | Up | 3.61E-06 | 5.38E-06 |
| novel_pir306   | 0 | 23 | 0.001 | 0.58 | 9.17990909  | Up | 3.61E-06 | 5.37E-06 |
| novel_pir825   | 0 | 23 | 0.001 | 0.58 | 9.17990909  | Up | 3.61E-06 | 5.37E-06 |
| novel_pir1188  | 0 | 23 | 0.001 | 0.58 | 9.17990909  | Up | 3.61E-06 | 5.37E-06 |
| novel_pir1457  | 0 | 22 | 0.001 | 0.55 | 9.103287808 | Up | 6.26E-06 | 9.25E-06 |
| novel_pir1449  | 0 | 22 | 0.001 | 0.55 | 9.103287808 | Up | 6.26E-06 | 9.24E-06 |
| novel_pir1712  | 0 | 22 | 0.001 | 0.55 | 9.103287808 | Up | 6.26E-06 | 9.23E-06 |
| mmu_piR_000802 | 0 | 22 | 0.001 | 0.55 | 9.103287808 | Up | 6.26E-06 | 9.22E-06 |
| novel_pir1297  | 0 | 22 | 0.001 | 0.55 | 9.103287808 | Up | 6.26E-06 | 9.22E-06 |
| novel_pir2133  | 0 | 22 | 0.001 | 0.55 | 9.103287808 | Up | 6.26E-06 | 9.21E-06 |
| novel_pir339   | 0 | 22 | 0.001 | 0.55 | 9.103287808 | Up | 6.26E-06 | 9.20E-06 |
| novel_pir223   | 0 | 22 | 0.001 | 0.55 | 9.103287808 | Up | 6.26E-06 | 9.19E-06 |
| novel_pir2324  | 0 | 22 | 0.001 | 0.55 | 9.103287808 | Up | 6.26E-06 | 9.19E-06 |
| novel_pir2295  | 0 | 22 | 0.001 | 0.55 | 9.103287808 | Up | 6.26E-06 | 9.18E-06 |
| mmu_piR_028055 | 0 | 21 | 0.001 | 0.53 | 9.049848549 | Up | 1.09E-05 | 1.59E-05 |
| novel_pir1271  | 0 | 21 | 0.001 | 0.53 | 9.049848549 | Up | 1.09E-05 | 1.59E-05 |
| novel_pir1630  | 0 | 21 | 0.001 | 0.53 | 9.049848549 | Up | 1.09E-05 | 1.59E-05 |
| novel_pir20    | 0 | 21 | 0.001 | 0.53 | 9.049848549 | Up | 1.09E-05 | 1.59E-05 |
| novel_pir1640  | 0 | 20 | 0.001 | 0.5  | 8.965784285 | Up | 1.89E-05 | 2.73E-05 |

|               |   |    |       |      |             |    |          |          |
|---------------|---|----|-------|------|-------------|----|----------|----------|
| novel_pir2130 | 0 | 20 | 0.001 | 0.5  | 8.965784285 | Up | 1.89E-05 | 2.73E-05 |
| novel_pir631  | 0 | 20 | 0.001 | 0.5  | 8.965784285 | Up | 1.89E-05 | 2.73E-05 |
| novel_pir430  | 0 | 20 | 0.001 | 0.5  | 8.965784285 | Up | 1.89E-05 | 2.73E-05 |
| novel_pir298  | 0 | 20 | 0.001 | 0.5  | 8.965784285 | Up | 1.89E-05 | 2.72E-05 |
| novel_pir2042 | 0 | 20 | 0.001 | 0.5  | 8.965784285 | Up | 1.89E-05 | 2.72E-05 |
| novel_pir1358 | 0 | 20 | 0.001 | 0.5  | 8.965784285 | Up | 1.89E-05 | 2.72E-05 |
| novel_pir146  | 0 | 20 | 0.001 | 0.5  | 8.965784285 | Up | 1.89E-05 | 2.72E-05 |
| novel_pir440  | 0 | 20 | 0.001 | 0.5  | 8.965784285 | Up | 1.89E-05 | 2.72E-05 |
| novel_pir1184 | 0 | 20 | 0.001 | 0.5  | 8.965784285 | Up | 1.89E-05 | 2.71E-05 |
| novel_pir558  | 0 | 19 | 0.001 | 0.48 | 8.906890596 | Up | 3.27E-05 | 4.66E-05 |
| novel_pir182  | 0 | 19 | 0.001 | 0.48 | 8.906890596 | Up | 3.27E-05 | 4.66E-05 |
| novel_pir625  | 0 | 19 | 0.001 | 0.48 | 8.906890596 | Up | 3.27E-05 | 4.66E-05 |
| novel_pir1378 | 0 | 19 | 0.001 | 0.48 | 8.906890596 | Up | 3.27E-05 | 4.65E-05 |
| novel_pir701  | 0 | 19 | 0.001 | 0.48 | 8.906890596 | Up | 3.27E-05 | 4.65E-05 |
| novel_pir209  | 0 | 19 | 0.001 | 0.48 | 8.906890596 | Up | 3.27E-05 | 4.65E-05 |
| novel_pir1031 | 0 | 19 | 0.001 | 0.48 | 8.906890596 | Up | 3.27E-05 | 4.64E-05 |
| novel_pir1939 | 0 | 19 | 0.001 | 0.48 | 8.906890596 | Up | 3.27E-05 | 4.64E-05 |
| novel_pir756  | 0 | 19 | 0.001 | 0.48 | 8.906890596 | Up | 3.27E-05 | 4.64E-05 |
| novel_pir943  | 0 | 19 | 0.001 | 0.48 | 8.906890596 | Up | 3.27E-05 | 4.63E-05 |
| novel_pir1450 | 0 | 19 | 0.001 | 0.48 | 8.906890596 | Up | 3.27E-05 | 4.63E-05 |
| novel_pir2055 | 0 | 19 | 0.001 | 0.48 | 8.906890596 | Up | 3.27E-05 | 4.63E-05 |
| novel_pir966  | 0 | 19 | 0.001 | 0.48 | 8.906890596 | Up | 3.27E-05 | 4.62E-05 |
| novel_pir81   | 0 | 19 | 0.001 | 0.48 | 8.906890596 | Up | 3.27E-05 | 4.62E-05 |
| novel_pir2205 | 0 | 18 | 0.001 | 0.45 | 8.813781191 | Up | 5.68E-05 | 8.01E-05 |
| novel_pir1061 | 0 | 18 | 0.001 | 0.45 | 8.813781191 | Up | 5.68E-05 | 8.00E-05 |
| novel_pir1764 | 0 | 18 | 0.001 | 0.45 | 8.813781191 | Up | 5.68E-05 | 8.00E-05 |
| novel_pir1507 | 0 | 18 | 0.001 | 0.45 | 8.813781191 | Up | 5.68E-05 | 7.99E-05 |
| novel_pir2397 | 0 | 18 | 0.001 | 0.45 | 8.813781191 | Up | 5.68E-05 | 7.98E-05 |
| novel_pir1162 | 0 | 18 | 0.001 | 0.45 | 8.813781191 | Up | 5.68E-05 | 7.98E-05 |
| novel_pir88   | 0 | 18 | 0.001 | 0.45 | 8.813781191 | Up | 5.68E-05 | 7.97E-05 |
| novel_pir1569 | 0 | 18 | 0.001 | 0.45 | 8.813781191 | Up | 5.68E-05 | 7.97E-05 |
| novel_pir247  | 0 | 18 | 0.001 | 0.45 | 8.813781191 | Up | 5.68E-05 | 7.96E-05 |
| novel_pir1374 | 0 | 18 | 0.001 | 0.45 | 8.813781191 | Up | 5.68E-05 | 7.95E-05 |
| novel_pir129  | 0 | 18 | 0.001 | 0.45 | 8.813781191 | Up | 5.68E-05 | 7.95E-05 |
| novel_pir1516 | 0 | 18 | 0.001 | 0.45 | 8.813781191 | Up | 5.68E-05 | 7.94E-05 |
| novel_pir381  | 0 | 18 | 0.001 | 0.45 | 8.813781191 | Up | 5.68E-05 | 7.94E-05 |

|                |   |    |       |      |             |    |             |             |
|----------------|---|----|-------|------|-------------|----|-------------|-------------|
| novel_pir560   | 0 | 18 | 0.001 | 0.45 | 8.813781191 | Up | 5.68E-05    | 7.93E-05    |
| novel_pir1     | 0 | 18 | 0.001 | 0.45 | 8.813781191 | Up | 5.68E-05    | 7.92E-05    |
| novel_pir87    | 0 | 18 | 0.001 | 0.45 | 8.813781191 | Up | 5.68E-05    | 7.92E-05    |
| novel_pir1233  | 0 | 18 | 0.001 | 0.45 | 8.813781191 | Up | 5.68E-05    | 7.91E-05    |
| novel_pir726   | 0 | 18 | 0.001 | 0.45 | 8.813781191 | Up | 5.68E-05    | 7.91E-05    |
| novel_pir1752  | 0 | 18 | 0.001 | 0.45 | 8.813781191 | Up | 5.68E-05    | 7.90E-05    |
| novel_pir2052  | 0 | 18 | 0.001 | 0.45 | 8.813781191 | Up | 5.68E-05    | 7.90E-05    |
| novel_pir71    | 0 | 18 | 0.001 | 0.45 | 8.813781191 | Up | 5.68E-05    | 7.89E-05    |
| novel_pir666   | 0 | 17 | 0.001 | 0.43 | 8.74819285  | Up | 9.85E-05    | 0.000135691 |
| novel_pir432   | 0 | 17 | 0.001 | 0.43 | 8.74819285  | Up | 9.85E-05    | 0.000135592 |
| novel_pir1933  | 0 | 17 | 0.001 | 0.43 | 8.74819285  | Up | 9.85E-05    | 0.000135493 |
| novel_pir619   | 0 | 17 | 0.001 | 0.43 | 8.74819285  | Up | 9.85E-05    | 0.000135394 |
| novel_pir1303  | 0 | 17 | 0.001 | 0.43 | 8.74819285  | Up | 9.85E-05    | 0.000135295 |
| novel_pir1777  | 0 | 17 | 0.001 | 0.43 | 8.74819285  | Up | 9.85E-05    | 0.000135196 |
| novel_pir1931  | 0 | 17 | 0.001 | 0.43 | 8.74819285  | Up | 9.85E-05    | 0.000135098 |
| novel_pir2464  | 0 | 17 | 0.001 | 0.43 | 8.74819285  | Up | 9.85E-05    | 0.000134999 |
| novel_pir765   | 0 | 17 | 0.001 | 0.43 | 8.74819285  | Up | 9.85E-05    | 0.000134901 |
| mmu_pir_022956 | 0 | 17 | 0.001 | 0.43 | 8.74819285  | Up | 9.85E-05    | 0.000134803 |
| novel_pir395   | 0 | 17 | 0.001 | 0.43 | 8.74819285  | Up | 9.85E-05    | 0.000134705 |
| novel_pir2455  | 0 | 17 | 0.001 | 0.43 | 8.74819285  | Up | 9.85E-05    | 0.000134607 |
| novel_pir2089  | 0 | 16 | 0.001 | 0.4  | 8.64385619  | Up | 0.000170882 | 0.0002312   |
| novel_pir114   | 0 | 16 | 0.001 | 0.4  | 8.64385619  | Up | 0.000170882 | 0.000231034 |
| novel_pir1329  | 0 | 16 | 0.001 | 0.4  | 8.64385619  | Up | 0.000170882 | 0.000230868 |
| novel_pir527   | 0 | 16 | 0.001 | 0.4  | 8.64385619  | Up | 0.000170882 | 0.000230703 |
| novel_pir1889  | 0 | 16 | 0.001 | 0.4  | 8.64385619  | Up | 0.000170882 | 0.000230537 |
| novel_pir870   | 0 | 16 | 0.001 | 0.4  | 8.64385619  | Up | 0.000170882 | 0.000230372 |
| novel_pir2456  | 0 | 16 | 0.001 | 0.4  | 8.64385619  | Up | 0.000170882 | 0.000230207 |
| novel_pir2371  | 0 | 16 | 0.001 | 0.4  | 8.64385619  | Up | 0.000170882 | 0.000230043 |
| novel_pir1626  | 0 | 16 | 0.001 | 0.4  | 8.64385619  | Up | 0.000170882 | 0.000229878 |
| novel_pir86    | 0 | 16 | 0.001 | 0.4  | 8.64385619  | Up | 0.000170882 | 0.000229714 |
| novel_pir1903  | 0 | 16 | 0.001 | 0.4  | 8.64385619  | Up | 0.000170882 | 0.00022955  |
| novel_pir1654  | 0 | 16 | 0.001 | 0.4  | 8.64385619  | Up | 0.000170882 | 0.000229386 |
| novel_pir1414  | 0 | 16 | 0.001 | 0.4  | 8.64385619  | Up | 0.000170882 | 0.000229223 |
| novel_pir26    | 0 | 16 | 0.001 | 0.4  | 8.64385619  | Up | 0.000170882 | 0.00022906  |
| novel_pir992   | 0 | 16 | 0.001 | 0.4  | 8.64385619  | Up | 0.000170882 | 0.000228896 |
| novel_pir1697  | 0 | 16 | 0.001 | 0.4  | 8.64385619  | Up | 0.000170882 | 0.000228734 |

|               |   |    |       |      |             |    |             |             |
|---------------|---|----|-------|------|-------------|----|-------------|-------------|
| novel_pir679  | 0 | 16 | 0.001 | 0.4  | 8.64385619  | Up | 0.000170882 | 0.000228571 |
| novel_pir300  | 0 | 16 | 0.001 | 0.4  | 8.64385619  | Up | 0.000170882 | 0.000228409 |
| novel_pir673  | 0 | 16 | 0.001 | 0.4  | 8.64385619  | Up | 0.000170882 | 0.000228247 |
| novel_pirl204 | 0 | 16 | 0.001 | 0.4  | 8.64385619  | Up | 0.000170882 | 0.000228085 |
| novel_pir2127 | 0 | 16 | 0.001 | 0.4  | 8.64385619  | Up | 0.000170882 | 0.000227923 |
| novel_pir578  | 0 | 16 | 0.001 | 0.4  | 8.64385619  | Up | 0.000170882 | 0.000227762 |
| novel_pir2262 | 0 | 16 | 0.001 | 0.4  | 8.64385619  | Up | 0.000170882 | 0.000227601 |
| novel_pir92   | 0 | 16 | 0.001 | 0.4  | 8.64385619  | Up | 0.000170882 | 0.00022744  |
| novel_pirl101 | 0 | 16 | 0.001 | 0.4  | 8.64385619  | Up | 0.000170882 | 0.000227279 |
| novel_pirl38  | 0 | 16 | 0.001 | 0.4  | 8.64385619  | Up | 0.000170882 | 0.000227118 |
| novel_pirl447 | 0 | 16 | 0.001 | 0.4  | 8.64385619  | Up | 0.000170882 | 0.000226958 |
| novel_pirl634 | 0 | 15 | 0.001 | 0.38 | 8.569855608 | Up | 0.00029649  | 0.000393508 |
| novel_pir83   | 0 | 15 | 0.001 | 0.38 | 8.569855608 | Up | 0.00029649  | 0.000393231 |
| novel_pirl346 | 0 | 15 | 0.001 | 0.38 | 8.569855608 | Up | 0.00029649  | 0.000392954 |
| novel_pirl403 | 0 | 15 | 0.001 | 0.38 | 8.569855608 | Up | 0.00029649  | 0.000392677 |
| novel_pirl311 | 0 | 15 | 0.001 | 0.38 | 8.569855608 | Up | 0.00029649  | 0.000392401 |
| novel_pir2270 | 0 | 15 | 0.001 | 0.38 | 8.569855608 | Up | 0.00029649  | 0.000392125 |
| novel_pirl28  | 0 | 15 | 0.001 | 0.38 | 8.569855608 | Up | 0.00029649  | 0.00039185  |
| novel_pirl789 | 0 | 15 | 0.001 | 0.38 | 8.569855608 | Up | 0.00029649  | 0.000391575 |
| novel_pir528  | 0 | 15 | 0.001 | 0.38 | 8.569855608 | Up | 0.00029649  | 0.0003913   |
| novel_pirl130 | 0 | 15 | 0.001 | 0.38 | 8.569855608 | Up | 0.00029649  | 0.000391026 |
| novel_pirl010 | 0 | 15 | 0.001 | 0.38 | 8.569855608 | Up | 0.00029649  | 0.000390752 |
| novel_pir391  | 0 | 15 | 0.001 | 0.38 | 8.569855608 | Up | 0.00029649  | 0.000390479 |
| novel_pirl263 | 0 | 15 | 0.001 | 0.38 | 8.569855608 | Up | 0.00029649  | 0.000390206 |
| novel_pir2231 | 0 | 15 | 0.001 | 0.38 | 8.569855608 | Up | 0.00029649  | 0.000389933 |
| novel_pirl102 | 0 | 15 | 0.001 | 0.38 | 8.569855608 | Up | 0.00029649  | 0.000389661 |
| novel_pir439  | 0 | 15 | 0.001 | 0.38 | 8.569855608 | Up | 0.00029649  | 0.000389389 |
| novel_pirl014 | 0 | 15 | 0.001 | 0.38 | 8.569855608 | Up | 0.00029649  | 0.000389117 |
| novel_pirl217 | 0 | 15 | 0.001 | 0.38 | 8.569855608 | Up | 0.00029649  | 0.000388846 |
| novel_pir988  | 0 | 15 | 0.001 | 0.38 | 8.569855608 | Up | 0.00029649  | 0.000388575 |
| novel_pir989  | 0 | 15 | 0.001 | 0.38 | 8.569855608 | Up | 0.00029649  | 0.000388305 |
| novel_pir2407 | 0 | 15 | 0.001 | 0.38 | 8.569855608 | Up | 0.00029649  | 0.000388035 |
| novel_pir2051 | 0 | 15 | 0.001 | 0.38 | 8.569855608 | Up | 0.00029649  | 0.000387765 |
| novel_pir2366 | 0 | 15 | 0.001 | 0.38 | 8.569855608 | Up | 0.00029649  | 0.000387496 |
| novel_pirl180 | 0 | 15 | 0.001 | 0.38 | 8.569855608 | Up | 0.00029649  | 0.000387227 |
| novel_pirl06  | 0 | 15 | 0.001 | 0.38 | 8.569855608 | Up | 0.00029649  | 0.000386959 |

|               |   |    |       |      |             |    |             |             |
|---------------|---|----|-------|------|-------------|----|-------------|-------------|
| novel_pir1961 | 0 | 15 | 0.001 | 0.38 | 8.569855608 | Up | 0.00029649  | 0.00038669  |
| novel_pir930  | 0 | 15 | 0.001 | 0.38 | 8.569855608 | Up | 0.00029649  | 0.000386423 |
| novel_pir582  | 0 | 15 | 0.001 | 0.38 | 8.569855608 | Up | 0.00029649  | 0.000386155 |
| novel_pir58   | 0 | 15 | 0.001 | 0.38 | 8.569855608 | Up | 0.00029649  | 0.000385888 |
| novel_pir270  | 0 | 15 | 0.001 | 0.38 | 8.569855608 | Up | 0.00029649  | 0.000385621 |
| novel_pir2131 | 0 | 15 | 0.001 | 0.38 | 8.569855608 | Up | 0.00029649  | 0.000385355 |
| novel_pir1717 | 0 | 15 | 0.001 | 0.38 | 8.569855608 | Up | 0.00029649  | 0.000385089 |
| novel_pir56   | 0 | 15 | 0.001 | 0.38 | 8.569855608 | Up | 0.00029649  | 0.000384824 |
| novel_pir2094 | 0 | 15 | 0.001 | 0.38 | 8.569855608 | Up | 0.00029649  | 0.000384558 |
| novel_pir2269 | 0 | 15 | 0.001 | 0.38 | 8.569855608 | Up | 0.00029649  | 0.000384294 |
| novel_pir127  | 0 | 15 | 0.001 | 0.38 | 8.569855608 | Up | 0.00029649  | 0.000384029 |
| novel_pir438  | 0 | 15 | 0.001 | 0.38 | 8.569855608 | Up | 0.00029649  | 0.000383765 |
| novel_pir1216 | 0 | 15 | 0.001 | 0.38 | 8.569855608 | Up | 0.00029649  | 0.000383501 |
| novel_pir2255 | 0 | 15 | 0.001 | 0.38 | 8.569855608 | Up | 0.00029649  | 0.000383238 |
| novel_pir583  | 0 | 14 | 0.001 | 0.35 | 8.451211112 | Up | 0.000514426 | 0.000664026 |
| novel_pir2280 | 0 | 14 | 0.001 | 0.35 | 8.451211112 | Up | 0.000514426 | 0.000663571 |
| novel_pir171  | 0 | 14 | 0.001 | 0.35 | 8.451211112 | Up | 0.000514426 | 0.000663116 |
| novel_pir338  | 0 | 14 | 0.001 | 0.35 | 8.451211112 | Up | 0.000514426 | 0.000662662 |
| novel_pir241  | 0 | 14 | 0.001 | 0.35 | 8.451211112 | Up | 0.000514426 | 0.000662209 |
| novel_pir1397 | 0 | 14 | 0.001 | 0.35 | 8.451211112 | Up | 0.000514426 | 0.000661756 |
| novel_pir972  | 0 | 14 | 0.001 | 0.35 | 8.451211112 | Up | 0.000514426 | 0.000661304 |
| novel_pir1774 | 0 | 14 | 0.001 | 0.35 | 8.451211112 | Up | 0.000514426 | 0.000660853 |
| novel_pir2128 | 0 | 14 | 0.001 | 0.35 | 8.451211112 | Up | 0.000514426 | 0.000660402 |
| novel_pir31   | 0 | 14 | 0.001 | 0.35 | 8.451211112 | Up | 0.000514426 | 0.000659952 |
| novel_pir1247 | 0 | 14 | 0.001 | 0.35 | 8.451211112 | Up | 0.000514426 | 0.000659503 |
| novel_pir763  | 0 | 14 | 0.001 | 0.35 | 8.451211112 | Up | 0.000514426 | 0.000659054 |
| novel_pir1648 | 0 | 14 | 0.001 | 0.35 | 8.451211112 | Up | 0.000514426 | 0.000658605 |
| novel_pir1651 | 0 | 14 | 0.001 | 0.35 | 8.451211112 | Up | 0.000514426 | 0.000658158 |
| novel_pir1109 | 0 | 14 | 0.001 | 0.35 | 8.451211112 | Up | 0.000514426 | 0.00065771  |
| novel_pir1639 | 0 | 14 | 0.001 | 0.35 | 8.451211112 | Up | 0.000514426 | 0.000657264 |
| novel_pir2157 | 0 | 14 | 0.001 | 0.35 | 8.451211112 | Up | 0.000514426 | 0.000656818 |
| novel_pir436  | 0 | 14 | 0.001 | 0.35 | 8.451211112 | Up | 0.000514426 | 0.000656373 |
| novel_pir167  | 0 | 14 | 0.001 | 0.35 | 8.451211112 | Up | 0.000514426 | 0.000655928 |
| novel_pir1155 | 0 | 14 | 0.001 | 0.35 | 8.451211112 | Up | 0.000514426 | 0.000655484 |
| novel_pir795  | 0 | 14 | 0.001 | 0.35 | 8.451211112 | Up | 0.000514426 | 0.00065504  |
| novel_pir687  | 0 | 14 | 0.001 | 0.35 | 8.451211112 | Up | 0.000514426 | 0.000654598 |



|                |      |        |        |         |              |      |             |             |
|----------------|------|--------|--------|---------|--------------|------|-------------|-------------|
| novel_pir2029  | 0    | 14     | 0.001  | 0.35    | 8.451211112  | Up   | 0.000514426 | 0.000654155 |
| novel_pir1222  | 0    | 14     | 0.001  | 0.35    | 8.451211112  | Up   | 0.000514426 | 0.000653714 |
| novel_pir297   | 0    | 14     | 0.001  | 0.35    | 8.451211112  | Up   | 0.000514426 | 0.000653272 |
| novel_pir366   | 0    | 14     | 0.001  | 0.35    | 8.451211112  | Up   | 0.000514426 | 0.000652832 |
| novel_pir515   | 0    | 14     | 0.001  | 0.35    | 8.451211112  | Up   | 0.000514426 | 0.000652392 |
| novel_pir2172  | 0    | 14     | 0.001  | 0.35    | 8.451211112  | Up   | 0.000514426 | 0.000651953 |
| novel_pir221   | 0    | 14     | 0.001  | 0.35    | 8.451211112  | Up   | 0.000514426 | 0.000651514 |
| novel_pir392   | 0    | 14     | 0.001  | 0.35    | 8.451211112  | Up   | 0.000514426 | 0.000651076 |
| novel_pir2232  | 0    | 14     | 0.001  | 0.35    | 8.451211112  | Up   | 0.000514426 | 0.000650638 |
| novel_pir1637  | 0    | 14     | 0.001  | 0.35    | 8.451211112  | Up   | 0.000514426 | 0.000650201 |
| novel_pir1755  | 0    | 14     | 0.001  | 0.35    | 8.451211112  | Up   | 0.000514426 | 0.000649765 |
| novel_pir1172  | 0    | 14     | 0.001  | 0.35    | 8.451211112  | Up   | 0.000514426 | 0.000649329 |
| novel_pir538   | 0    | 14     | 0.001  | 0.35    | 8.451211112  | Up   | 0.000514426 | 0.000648894 |
| novel_pir96    | 0    | 14     | 0.001  | 0.35    | 8.451211112  | Up   | 0.000514426 | 0.000648459 |
| novel_pir1875  | 0    | 14     | 0.001  | 0.35    | 8.451211112  | Up   | 0.000514426 | 0.000648025 |
| novel_pir574   | 0    | 14     | 0.001  | 0.35    | 8.451211112  | Up   | 0.000514426 | 0.000647592 |
| novel_pir781   | 0    | 14     | 0.001  | 0.35    | 8.451211112  | Up   | 0.000514426 | 0.000647159 |
| novel_pir1695  | 0    | 14     | 0.001  | 0.35    | 8.451211112  | Up   | 0.000514426 | 0.000646727 |
| novel_pir1380  | 0    | 14     | 0.001  | 0.35    | 8.451211112  | Up   | 0.000514426 | 0.000646295 |
| novel_pir2013  | 0    | 14     | 0.001  | 0.35    | 8.451211112  | Up   | 0.000514426 | 0.000645864 |
| mmu_piR_022097 | 32   | 4833   | 1.09   | 120.98  | 6.794296621  | Up   | 0           | 0           |
| mmu_piR_032015 | 4    | 343    | 0.14   | 8.59    | 5.939159399  | Up   | 1.86E-75    | 5.72E-75    |
| mmu_piR_000958 | 1    | 65     | 0.03   | 1.63    | 5.763765654  | Up   | 9.29E-15    | 1.65E-14    |
| mmu_piR_000935 | 2838 | 179644 | 96.65  | 4496.95 | 5.540033301  | Up   | 0           | 0           |
| mmu_piR_000870 | 1    | 55     | 0.03   | 1.38    | 5.523561956  | Up   | 1.96E-12    | 3.40E-12    |
| mmu_piR_033077 | 2    | 109    | 0.07   | 2.73    | 5.285402219  | Up   | 1.08E-23    | 2.15E-23    |
| mmu_piR_034411 | 2    | 107    | 0.07   | 2.68    | 5.258734268  | Up   | 3.15E-23    | 6.22E-23    |
| mmu_piR_038322 | 1    | 30     | 0.03   | 0.75    | 4.64385619   | Up   | 1.08E-06    | 1.65E-06    |
| mmu_piR_038312 | 1    | 26     | 0.03   | 0.65    | 4.437405312  | Up   | 8.60E-06    | 1.26E-05    |
| novel_pir2034  | 1123 | 19612  | 38.24  | 490.94  | 3.682392289  | Up   | 0           | 0           |
| mmu_piR_000159 | 3    | 42     | 0.1    | 1.05    | 3.392317423  | Up   | 1.30E-07    | 2.06E-07    |
| mmu_piR_000273 | 117  | 759    | 3.98   | 19      | 2.255159083  | Up   | 1.25E-77    | 3.89E-77    |
| novel_pir125   | 4195 | 0      | 142.86 | 0.001   | -17.1242425  | Down | 0           | 0           |
| novel_pir613   | 1945 | 0      | 66.24  | 0.001   | -16.01541505 | Down | 0           | 0           |
| novel_pir13    | 1438 | 0      | 48.97  | 0.001   | -15.57961058 | Down | 0           | 0           |
| novel_pir274   | 1281 | 0      | 43.62  | 0.001   | -15.41270215 | Down | 0           | 0           |

|                |      |   |       |       |              |      |           |           |
|----------------|------|---|-------|-------|--------------|------|-----------|-----------|
| novel_pir14    | 1223 | 0 | 41.65 | 0.001 | -15.34602888 | Down | 0         | 0         |
| mmu_pir_024749 | 1110 | 0 | 37.8  | 0.001 | -15.20609861 | Down | 0         | 0         |
| novel_pir615   | 991  | 0 | 33.75 | 0.001 | -15.04259988 | Down | 0         | 0         |
| novel_pir340   | 856  | 0 | 29.15 | 0.001 | -14.83120826 | Down | 0         | 0         |
| novel_pir123   | 853  | 0 | 29.05 | 0.001 | -14.82625054 | Down | 0         | 0         |
| novel_pir863   | 778  | 0 | 26.5  | 0.001 | -14.69370474 | Down | 5.49E-291 | 3.56E-289 |
| novel_pir728   | 764  | 0 | 26.02 | 0.001 | -14.66733334 | Down | 9.15E-286 | 5.74E-284 |
| novel_pir961   | 743  | 0 | 25.3  | 0.001 | -14.62684976 | Down | 6.23E-278 | 3.66E-276 |
| novel_pir136   | 720  | 0 | 24.52 | 0.001 | -14.58167136 | Down | 2.36E-269 | 1.35E-267 |
| novel_pir1524  | 686  | 0 | 23.36 | 0.001 | -14.51175265 | Down | 1.14E-256 | 6.28E-255 |
| novel_pir194   | 684  | 0 | 23.29 | 0.001 | -14.50742302 | Down | 6.32E-256 | 3.40E-254 |
| novel_pir611   | 675  | 0 | 22.99 | 0.001 | -14.48871885 | Down | 1.44E-252 | 7.32E-251 |
| novel_pir2175  | 670  | 0 | 22.82 | 0.001 | -14.47801117 | Down | 1.05E-250 | 5.22E-249 |
| novel_pir1517  | 663  | 0 | 22.58 | 0.001 | -14.46275787 | Down | 4.30E-248 | 2.03E-246 |
| novel_pir778   | 661  | 0 | 22.51 | 0.001 | -14.45827844 | Down | 2.40E-247 | 1.07E-245 |
| novel_pir1581  | 637  | 0 | 21.69 | 0.001 | -14.40474243 | Down | 2.15E-238 | 9.39E-237 |
| novel_pir967   | 627  | 0 | 21.35 | 0.001 | -14.38194845 | Down | 1.15E-234 | 4.71E-233 |
| novel_pir2332  | 625  | 0 | 21.28 | 0.001 | -14.37721053 | Down | 6.42E-234 | 2.57E-232 |
| novel_pir1994  | 616  | 0 | 20.98 | 0.001 | -14.35672706 | Down | 1.46E-230 | 5.73E-229 |
| novel_pir2237  | 612  | 0 | 20.84 | 0.001 | -14.34706766 | Down | 4.53E-229 | 1.71E-227 |
| novel_pir79    | 599  | 0 | 20.4  | 0.001 | -14.31628153 | Down | 3.20E-224 | 1.18E-222 |
| novel_pir780   | 597  | 0 | 20.33 | 0.001 | -14.31132259 | Down | 1.78E-223 | 6.46E-222 |
| novel_pir10    | 588  | 0 | 20.02 | 0.001 | -14.28915435 | Down | 4.06E-220 | 1.44E-218 |
| novel_pir47    | 580  | 0 | 19.75 | 0.001 | -14.26956503 | Down | 3.91E-217 | 1.36E-215 |
| novel_pir287   | 574  | 0 | 19.55 | 0.001 | -14.25488099 | Down | 6.76E-215 | 2.31E-213 |
| novel_pir2321  | 568  | 0 | 19.34 | 0.001 | -14.23930017 | Down | 1.17E-212 | 3.93E-211 |
| novel_pir1707  | 560  | 0 | 19.07 | 0.001 | -14.21901722 | Down | 1.13E-209 | 3.66E-208 |
| novel_pir1262  | 556  | 0 | 18.93 | 0.001 | -14.20838679 | Down | 3.50E-208 | 1.12E-206 |
| novel_pir1368  | 550  | 0 | 18.73 | 0.001 | -14.19306328 | Down | 6.05E-206 | 1.90E-204 |
| novel_pir1334  | 532  | 0 | 18.12 | 0.001 | -14.14529533 | Down | 3.13E-199 | 9.67E-198 |
| novel_pir1179  | 519  | 0 | 17.67 | 0.001 | -14.10901442 | Down | 2.21E-194 | 6.72E-193 |
| novel_pir166   | 517  | 0 | 17.61 | 0.001 | -14.10410729 | Down | 1.23E-193 | 3.68E-192 |
| novel_pir766   | 512  | 0 | 17.44 | 0.001 | -14.09011242 | Down | 9.03E-192 | 2.62E-190 |
| novel_pir228   | 510  | 0 | 17.37 | 0.001 | -14.08431013 | Down | 5.03E-191 | 1.43E-189 |
| novel_pir551   | 508  | 0 | 17.3  | 0.001 | -14.07848442 | Down | 2.80E-190 | 7.88E-189 |
| novel_pir2184  | 507  | 0 | 17.27 | 0.001 | -14.07598046 | Down | 6.62E-190 | 1.83E-188 |

|               |     |   |       |       |              |      |           |           |
|---------------|-----|---|-------|-------|--------------|------|-----------|-----------|
| novel_pir126  | 502 | 0 | 17.1  | 0.001 | -14.0617087  | Down | 4.85E-188 | 1.32E-186 |
| novel_pir1382 | 500 | 0 | 17.03 | 0.001 | -14.05579081 | Down | 2.70E-187 | 7.26E-186 |
| novel_pir1207 | 495 | 0 | 16.86 | 0.001 | -14.04131692 | Down | 1.98E-185 | 5.25E-184 |
| novel_pir2257 | 491 | 0 | 16.72 | 0.001 | -14.02928723 | Down | 6.15E-184 | 1.61E-182 |
| novel_pir2099 | 484 | 0 | 16.48 | 0.001 | -14.00842862 | Down | 2.51E-181 | 6.47E-180 |
| novel_pir67   | 484 | 0 | 16.48 | 0.001 | -14.00842862 | Down | 2.51E-181 | 6.38E-180 |
| novel_pir1734 | 484 | 0 | 16.48 | 0.001 | -14.00842862 | Down | 2.51E-181 | 6.30E-180 |
| novel_pir2083 | 483 | 0 | 16.45 | 0.001 | -14.00579996 | Down | 5.92E-181 | 1.47E-179 |
| novel_pir3    | 480 | 0 | 16.35 | 0.001 | -13.99700302 | Down | 7.79E-180 | 1.90E-178 |
| novel_pir617  | 476 | 0 | 16.21 | 0.001 | -13.98459647 | Down | 2.42E-178 | 5.83E-177 |
| novel_pir2049 | 476 | 0 | 16.21 | 0.001 | -13.98459647 | Down | 2.42E-178 | 5.76E-177 |
| novel_pir6    | 476 | 0 | 16.21 | 0.001 | -13.98459647 | Down | 2.42E-178 | 5.69E-177 |
| novel_pir628  | 472 | 0 | 16.07 | 0.001 | -13.97208231 | Down | 7.51E-177 | 1.74E-175 |
| novel_pir364  | 471 | 0 | 16.04 | 0.001 | -13.96938652 | Down | 1.77E-176 | 4.07E-175 |
| novel_pir329  | 469 | 0 | 15.97 | 0.001 | -13.96307669 | Down | 9.87E-176 | 2.24E-174 |
| novel_pir573  | 468 | 0 | 15.94 | 0.001 | -13.96036401 | Down | 2.33E-175 | 5.22E-174 |
| novel_pir2086 | 466 | 0 | 15.87 | 0.001 | -13.95401451 | Down | 1.30E-174 | 2.88E-173 |
| novel_pir226  | 464 | 0 | 15.8  | 0.001 | -13.94763694 | Down | 7.23E-174 | 1.58E-172 |
| novel_pir872  | 461 | 0 | 15.7  | 0.001 | -13.93847694 | Down | 9.51E-173 | 2.06E-171 |
| novel_pir1406 | 460 | 0 | 15.67 | 0.001 | -13.93571756 | Down | 2.25E-172 | 4.80E-171 |
| novel_pir111  | 459 | 0 | 15.63 | 0.001 | -13.93203016 | Down | 5.30E-172 | 1.12E-170 |
| novel_pir2214 | 458 | 0 | 15.6  | 0.001 | -13.92925841 | Down | 1.25E-171 | 2.62E-170 |
| novel_pir195  | 458 | 0 | 15.6  | 0.001 | -13.92925841 | Down | 1.25E-171 | 2.59E-170 |
| novel_pir2306 | 458 | 0 | 15.6  | 0.001 | -13.92925841 | Down | 1.25E-171 | 2.56E-170 |
| novel_pir68   | 458 | 0 | 15.6  | 0.001 | -13.92925841 | Down | 1.25E-171 | 2.53E-170 |
| novel_pir547  | 456 | 0 | 15.53 | 0.001 | -13.92277021 | Down | 6.97E-171 | 1.40E-169 |
| novel_pir2093 | 455 | 0 | 15.5  | 0.001 | -13.9199806  | Down | 1.65E-170 | 3.26E-169 |
| novel_pir336  | 452 | 0 | 15.39 | 0.001 | -13.90970561 | Down | 2.16E-169 | 4.24E-168 |
| novel_pir1148 | 450 | 0 | 15.32 | 0.001 | -13.90312868 | Down | 1.21E-168 | 2.34E-167 |
| novel_pir1215 | 449 | 0 | 15.29 | 0.001 | -13.90030079 | Down | 2.85E-168 | 5.47E-167 |
| novel_pir1161 | 447 | 0 | 15.22 | 0.001 | -13.89368074 | Down | 1.59E-167 | 3.01E-166 |
| novel_pir2026 | 445 | 0 | 15.15 | 0.001 | -13.88703017 | Down | 8.84E-167 | 1.66E-165 |
| novel_pir2271 | 443 | 0 | 15.09 | 0.001 | -13.88130519 | Down | 4.92E-166 | 9.17E-165 |
| novel_pir348  | 441 | 0 | 15.02 | 0.001 | -13.87459719 | Down | 2.74E-165 | 5.06E-164 |
| novel_pir469  | 438 | 0 | 14.92 | 0.001 | -13.86495992 | Down | 3.61E-164 | 6.59E-163 |
| novel_pir1705 | 438 | 0 | 14.92 | 0.001 | -13.86495992 | Down | 3.61E-164 | 6.53E-163 |

|               |     |   |       |       |              |      |           |           |
|---------------|-----|---|-------|-------|--------------|------|-----------|-----------|
| novel_pir380  | 436 | 0 | 14.85 | 0.001 | -13.85817531 | Down | 2.01E-163 | 3.60E-162 |
| novel_pir2263 | 436 | 0 | 14.85 | 0.001 | -13.85817531 | Down | 2.01E-163 | 3.57E-162 |
| novel_pir1767 | 434 | 0 | 14.78 | 0.001 | -13.85135865 | Down | 1.12E-162 | 1.97E-161 |
| novel_pir575  | 433 | 0 | 14.75 | 0.001 | -13.84842733 | Down | 2.64E-162 | 4.61E-161 |
| novel_pir1258 | 433 | 0 | 14.75 | 0.001 | -13.84842733 | Down | 2.64E-162 | 4.56E-161 |
| novel_pir347  | 432 | 0 | 14.71 | 0.001 | -13.84450963 | Down | 6.24E-162 | 1.07E-160 |
| novel_pir400  | 432 | 0 | 14.71 | 0.001 | -13.84450963 | Down | 6.24E-162 | 1.06E-160 |
| novel_pir1937 | 432 | 0 | 14.71 | 0.001 | -13.84450963 | Down | 6.24E-162 | 1.05E-160 |
| novel_pir1689 | 430 | 0 | 14.64 | 0.001 | -13.83762793 | Down | 3.48E-161 | 5.74E-160 |
| novel_pir1716 | 430 | 0 | 14.64 | 0.001 | -13.83762793 | Down | 3.48E-161 | 5.69E-160 |
| novel_pir809  | 429 | 0 | 14.61 | 0.001 | -13.83466856 | Down | 8.21E-161 | 1.33E-159 |
| novel_pir1073 | 429 | 0 | 14.61 | 0.001 | -13.83466856 | Down | 8.21E-161 | 1.32E-159 |
| novel_pir2139 | 429 | 0 | 14.61 | 0.001 | -13.83466856 | Down | 8.21E-161 | 1.31E-159 |
| novel_pir1218 | 429 | 0 | 14.61 | 0.001 | -13.83466856 | Down | 8.21E-161 | 1.30E-159 |
| novel_pir2095 | 427 | 0 | 14.54 | 0.001 | -13.82773965 | Down | 4.57E-160 | 7.17E-159 |
| novel_pir1881 | 427 | 0 | 14.54 | 0.001 | -13.82773965 | Down | 4.57E-160 | 7.11E-159 |
| novel_pir1055 | 426 | 0 | 14.51 | 0.001 | -13.8247599  | Down | 1.08E-159 | 1.66E-158 |
| novel_pir2059 | 422 | 0 | 14.37 | 0.001 | -13.81077244 | Down | 3.35E-158 | 5.13E-157 |
| novel_pir651  | 420 | 0 | 14.3  | 0.001 | -13.80372753 | Down | 1.87E-157 | 2.83E-156 |
| novel_pir820  | 417 | 0 | 14.2  | 0.001 | -13.79360331 | Down | 2.46E-156 | 3.70E-155 |
| novel_pir2226 | 416 | 0 | 14.17 | 0.001 | -13.79055214 | Down | 5.80E-156 | 8.66E-155 |
| novel_pir204  | 416 | 0 | 14.17 | 0.001 | -13.79055214 | Down | 5.80E-156 | 8.59E-155 |
| novel_pir1065 | 413 | 0 | 14.06 | 0.001 | -13.77930897 | Down | 7.62E-155 | 1.12E-153 |
| novel_pir119  | 412 | 0 | 14.03 | 0.001 | -13.77622739 | Down | 1.80E-154 | 2.62E-153 |
| novel_pir2018 | 412 | 0 | 14.03 | 0.001 | -13.77622739 | Down | 1.80E-154 | 2.60E-153 |
| novel_pir1395 | 412 | 0 | 14.03 | 0.001 | -13.77622739 | Down | 1.80E-154 | 2.58E-153 |
| novel_pir1684 | 412 | 0 | 14.03 | 0.001 | -13.77622739 | Down | 1.80E-154 | 2.57E-153 |
| novel_pir1441 | 411 | 0 | 14    | 0.001 | -13.77313921 | Down | 4.25E-154 | 6.01E-153 |
| novel_pir1159 | 408 | 0 | 13.89 | 0.001 | -13.76175898 | Down | 5.58E-153 | 7.79E-152 |
| novel_pir495  | 407 | 0 | 13.86 | 0.001 | -13.75863964 | Down | 1.32E-152 | 1.82E-151 |
| novel_pir1100 | 405 | 0 | 13.79 | 0.001 | -13.75133484 | Down | 7.35E-152 | 1.01E-150 |
| novel_pir22   | 405 | 0 | 13.79 | 0.001 | -13.75133484 | Down | 7.35E-152 | 1.00E-150 |
| novel_pir1775 | 404 | 0 | 13.76 | 0.001 | -13.74819285 | Down | 1.73E-151 | 2.35E-150 |
| novel_pir2105 | 403 | 0 | 13.72 | 0.001 | -13.74399286 | Down | 4.09E-151 | 5.50E-150 |
| novel_pir2395 | 403 | 0 | 13.72 | 0.001 | -13.74399286 | Down | 4.09E-151 | 5.46E-150 |
| novel_pir1900 | 403 | 0 | 13.72 | 0.001 | -13.74399286 | Down | 4.09E-151 | 5.42E-150 |

|               |     |   |       |       |              |      |           |           |
|---------------|-----|---|-------|-------|--------------|------|-----------|-----------|
| novel_pir783  | 401 | 0 | 13.66 | 0.001 | -13.73766986 | Down | 2.28E-150 | 3.00E-149 |
| novel_pir1465 | 400 | 0 | 13.62 | 0.001 | -13.73343908 | Down | 5.38E-150 | 7.03E-149 |
| novel_pir396  | 399 | 0 | 13.59 | 0.001 | -13.73025784 | Down | 1.27E-149 | 1.65E-148 |
| novel_pir2193 | 398 | 0 | 13.55 | 0.001 | -13.72600523 | Down | 3.00E-149 | 3.87E-148 |
| novel_pir917  | 397 | 0 | 13.52 | 0.001 | -13.72280753 | Down | 7.08E-149 | 9.06E-148 |
| novel_pir1643 | 397 | 0 | 13.52 | 0.001 | -13.72280753 | Down | 7.08E-149 | 9.00E-148 |
| novel_pir315  | 397 | 0 | 13.52 | 0.001 | -13.72280753 | Down | 7.08E-149 | 8.94E-148 |
| novel_pir612  | 397 | 0 | 13.52 | 0.001 | -13.72280753 | Down | 7.08E-149 | 8.88E-148 |
| novel_pir1114 | 395 | 0 | 13.45 | 0.001 | -13.71531855 | Down | 3.94E-148 | 4.92E-147 |
| novel_pir1028 | 394 | 0 | 13.42 | 0.001 | -13.71209705 | Down | 9.31E-148 | 1.15E-146 |
| novel_pir2354 | 394 | 0 | 13.42 | 0.001 | -13.71209705 | Down | 9.31E-148 | 1.15E-146 |
| novel_pir1659 | 393 | 0 | 13.38 | 0.001 | -13.7077905  | Down | 2.20E-147 | 2.69E-146 |
| novel_pir516  | 393 | 0 | 13.38 | 0.001 | -13.7077905  | Down | 2.20E-147 | 2.67E-146 |
| novel_pir1359 | 391 | 0 | 13.32 | 0.001 | -13.70130646 | Down | 1.22E-146 | 1.48E-145 |
| novel_pir876  | 388 | 0 | 13.21 | 0.001 | -13.68934285 | Down | 1.61E-145 | 1.93E-144 |
| novel_pir751  | 388 | 0 | 13.21 | 0.001 | -13.68934285 | Down | 1.61E-145 | 1.92E-144 |
| novel_pir1088 | 388 | 0 | 13.21 | 0.001 | -13.68934285 | Down | 1.61E-145 | 1.91E-144 |
| novel_pir1862 | 388 | 0 | 13.21 | 0.001 | -13.68934285 | Down | 1.61E-145 | 1.89E-144 |
| novel_pir1340 | 387 | 0 | 13.18 | 0.001 | -13.68606275 | Down | 3.80E-145 | 4.44E-144 |
| novel_pir23   | 387 | 0 | 13.18 | 0.001 | -13.68606275 | Down | 3.80E-145 | 4.42E-144 |
| novel_pir1241 | 386 | 0 | 13.15 | 0.001 | -13.68277518 | Down | 8.97E-145 | 1.04E-143 |
| novel_pir314  | 386 | 0 | 13.15 | 0.001 | -13.68277518 | Down | 8.97E-145 | 1.03E-143 |
| novel_pir346  | 386 | 0 | 13.15 | 0.001 | -13.68277518 | Down | 8.97E-145 | 1.02E-143 |
| novel_pir2192 | 385 | 0 | 13.11 | 0.001 | -13.67838007 | Down | 2.12E-144 | 2.40E-143 |
| novel_pir1481 | 384 | 0 | 13.08 | 0.001 | -13.67507492 | Down | 5.00E-144 | 5.63E-143 |
| novel_pir1670 | 382 | 0 | 13.01 | 0.001 | -13.66733334 | Down | 2.79E-143 | 3.12E-142 |
| novel_pir713  | 381 | 0 | 12.98 | 0.001 | -13.66400276 | Down | 6.57E-143 | 7.32E-142 |
| novel_pir540  | 381 | 0 | 12.98 | 0.001 | -13.66400276 | Down | 6.57E-143 | 7.28E-142 |
| novel_pir481  | 381 | 0 | 12.98 | 0.001 | -13.66400276 | Down | 6.57E-143 | 7.24E-142 |
| novel_pir282  | 381 | 0 | 12.98 | 0.001 | -13.66400276 | Down | 6.57E-143 | 7.19E-142 |
| novel_pir974  | 381 | 0 | 12.98 | 0.001 | -13.66400276 | Down | 6.57E-143 | 7.15E-142 |
| novel_pir959  | 381 | 0 | 12.98 | 0.001 | -13.66400276 | Down | 6.57E-143 | 7.11E-142 |
| novel_pir548  | 380 | 0 | 12.94 | 0.001 | -13.65955    | Down | 1.55E-142 | 1.66E-141 |
| novel_pir669  | 380 | 0 | 12.94 | 0.001 | -13.65955    | Down | 1.55E-142 | 1.65E-141 |
| novel_pir1740 | 379 | 0 | 12.91 | 0.001 | -13.65620138 | Down | 3.66E-142 | 3.87E-141 |
| novel_pir1727 | 379 | 0 | 12.91 | 0.001 | -13.65620138 | Down | 3.66E-142 | 3.85E-141 |

|               |     |   |       |       |              |      |           |           |
|---------------|-----|---|-------|-------|--------------|------|-----------|-----------|
| novel_pir2254 | 378 | 0 | 12.87 | 0.001 | -13.65172443 | Down | 8.65E-142 | 9.04E-141 |
| novel_pir545  | 378 | 0 | 12.87 | 0.001 | -13.65172443 | Down | 8.65E-142 | 8.99E-141 |
| novel_pir697  | 377 | 0 | 12.84 | 0.001 | -13.64835758 | Down | 2.04E-141 | 2.10E-140 |
| novel_pir2289 | 376 | 0 | 12.8  | 0.001 | -13.64385619 | Down | 4.82E-141 | 4.93E-140 |
| novel_pir2101 | 376 | 0 | 12.8  | 0.001 | -13.64385619 | Down | 4.82E-141 | 4.90E-140 |
| novel_pir2375 | 375 | 0 | 12.77 | 0.001 | -13.6404709  | Down | 1.14E-140 | 1.15E-139 |
| novel_pir1985 | 374 | 0 | 12.74 | 0.001 | -13.63707766 | Down | 2.68E-140 | 2.70E-139 |
| novel_pir1721 | 373 | 0 | 12.7  | 0.001 | -13.63254088 | Down | 6.34E-140 | 6.34E-139 |
| novel_pir1034 | 373 | 0 | 12.7  | 0.001 | -13.63254088 | Down | 6.34E-140 | 6.31E-139 |
| novel_pir1294 | 372 | 0 | 12.67 | 0.001 | -13.6291289  | Down | 1.50E-139 | 1.48E-138 |
| novel_pir1750 | 371 | 0 | 12.63 | 0.001 | -13.62456702 | Down | 3.53E-139 | 3.48E-138 |
| novel_pir2176 | 371 | 0 | 12.63 | 0.001 | -13.62456702 | Down | 3.53E-139 | 3.46E-138 |
| novel_pir688  | 370 | 0 | 12.6  | 0.001 | -13.62113611 | Down | 8.33E-139 | 8.12E-138 |
| novel_pir1388 | 370 | 0 | 12.6  | 0.001 | -13.62113611 | Down | 8.33E-139 | 8.08E-138 |
| novel_pir1984 | 369 | 0 | 12.57 | 0.001 | -13.61769703 | Down | 1.97E-138 | 1.90E-137 |
| novel_pir1942 | 368 | 0 | 12.53 | 0.001 | -13.61309879 | Down | 4.64E-138 | 4.46E-137 |
| novel_pir1269 | 367 | 0 | 12.5  | 0.001 | -13.60964047 | Down | 1.10E-137 | 1.05E-136 |
| novel_pir634  | 367 | 0 | 12.5  | 0.001 | -13.60964047 | Down | 1.10E-137 | 1.04E-136 |
| novel_pir205  | 366 | 0 | 12.46 | 0.001 | -13.60501645 | Down | 2.59E-137 | 2.45E-136 |
| novel_pir124  | 366 | 0 | 12.46 | 0.001 | -13.60501645 | Down | 2.59E-137 | 2.43E-136 |
| novel_pir2265 | 364 | 0 | 12.4  | 0.001 | -13.5980525  | Down | 1.44E-136 | 1.35E-135 |
| novel_pir774  | 364 | 0 | 12.4  | 0.001 | -13.5980525  | Down | 1.44E-136 | 1.34E-135 |
| novel_pir2471 | 364 | 0 | 12.4  | 0.001 | -13.5980525  | Down | 1.44E-136 | 1.34E-135 |
| novel_pir1379 | 364 | 0 | 12.4  | 0.001 | -13.5980525  | Down | 1.44E-136 | 1.33E-135 |
| novel_pir954  | 364 | 0 | 12.4  | 0.001 | -13.5980525  | Down | 1.44E-136 | 1.32E-135 |
| novel_pir448  | 363 | 0 | 12.36 | 0.001 | -13.59339112 | Down | 3.40E-136 | 3.11E-135 |
| novel_pir374  | 362 | 0 | 12.33 | 0.001 | -13.58988518 | Down | 8.03E-136 | 7.30E-135 |
| novel_pir1676 | 362 | 0 | 12.33 | 0.001 | -13.58988518 | Down | 8.03E-136 | 7.27E-135 |
| novel_pir2378 | 361 | 0 | 12.29 | 0.001 | -13.5851973  | Down | 1.90E-135 | 1.71E-134 |
| novel_pir1804 | 361 | 0 | 12.29 | 0.001 | -13.5851973  | Down | 1.90E-135 | 1.70E-134 |
| novel_pir1232 | 361 | 0 | 12.29 | 0.001 | -13.5851973  | Down | 1.90E-135 | 1.69E-134 |
| novel_pir775  | 360 | 0 | 12.26 | 0.001 | -13.58167136 | Down | 4.47E-135 | 3.97E-134 |
| novel_pir556  | 360 | 0 | 12.26 | 0.001 | -13.58167136 | Down | 4.47E-135 | 3.95E-134 |
| novel_pir682  | 360 | 0 | 12.26 | 0.001 | -13.58167136 | Down | 4.47E-135 | 3.93E-134 |
| novel_pir416  | 359 | 0 | 12.23 | 0.001 | -13.57813678 | Down | 1.06E-134 | 9.24E-134 |
| novel_pir377  | 359 | 0 | 12.23 | 0.001 | -13.57813678 | Down | 1.06E-134 | 9.20E-134 |

|               |     |   |       |       |              |      |           |           |
|---------------|-----|---|-------|-------|--------------|------|-----------|-----------|
| novel_pir2314 | 358 | 0 | 12.19 | 0.001 | -13.57341051 | Down | 2.49E-134 | 2.16E-133 |
| novel_pir743  | 358 | 0 | 12.19 | 0.001 | -13.57341051 | Down | 2.49E-134 | 2.15E-133 |
| novel_pir2097 | 356 | 0 | 12.12 | 0.001 | -13.56510208 | Down | 1.39E-133 | 1.19E-132 |
| novel_pir667  | 356 | 0 | 12.12 | 0.001 | -13.56510208 | Down | 1.39E-133 | 1.19E-132 |
| novel_pirl260 | 354 | 0 | 12.06 | 0.001 | -13.55794229 | Down | 7.74E-133 | 6.56E-132 |
| novel_pir591  | 354 | 0 | 12.06 | 0.001 | -13.55794229 | Down | 7.74E-133 | 6.53E-132 |
| novel_pir748  | 354 | 0 | 12.06 | 0.001 | -13.55794229 | Down | 7.74E-133 | 6.50E-132 |
| novel_pirl647 | 353 | 0 | 12.02 | 0.001 | -13.55314928 | Down | 1.83E-132 | 1.53E-131 |
| novel_pirl814 | 352 | 0 | 11.99 | 0.001 | -13.54954404 | Down | 4.31E-132 | 3.59E-131 |
| novel_pirl791 | 352 | 0 | 11.99 | 0.001 | -13.54954404 | Down | 4.31E-132 | 3.57E-131 |
| novel_pirl523 | 352 | 0 | 11.99 | 0.001 | -13.54954404 | Down | 4.31E-132 | 3.56E-131 |
| novel_pir313  | 351 | 0 | 11.95 | 0.001 | -13.544723   | Down | 1.02E-131 | 8.36E-131 |
| novel_pir37   | 350 | 0 | 11.92 | 0.001 | -13.54109662 | Down | 2.40E-131 | 1.97E-130 |
| novel_pirl493 | 350 | 0 | 11.92 | 0.001 | -13.54109662 | Down | 2.40E-131 | 1.96E-130 |
| novel_pir369  | 349 | 0 | 11.89 | 0.001 | -13.53746109 | Down | 5.67E-131 | 4.60E-130 |
| novel_pir7    | 349 | 0 | 11.89 | 0.001 | -13.53746109 | Down | 5.67E-131 | 4.58E-130 |
| novel_pirl319 | 349 | 0 | 11.89 | 0.001 | -13.53746109 | Down | 5.67E-131 | 4.56E-130 |
| novel_pir664  | 349 | 0 | 11.89 | 0.001 | -13.53746109 | Down | 5.67E-131 | 4.54E-130 |
| novel_pir862  | 349 | 0 | 11.89 | 0.001 | -13.53746109 | Down | 5.67E-131 | 4.52E-130 |
| novel_pirl415 | 348 | 0 | 11.85 | 0.001 | -13.53259944 | Down | 1.34E-130 | 1.06E-129 |
| novel_pirl012 | 348 | 0 | 11.85 | 0.001 | -13.53259944 | Down | 1.34E-130 | 1.06E-129 |
| novel_pirl86  | 348 | 0 | 11.85 | 0.001 | -13.53259944 | Down | 1.34E-130 | 1.05E-129 |
| novel_pir206  | 347 | 0 | 11.82 | 0.001 | -13.52894242 | Down | 3.16E-130 | 2.48E-129 |
| novel_pir767  | 347 | 0 | 11.82 | 0.001 | -13.52894242 | Down | 3.16E-130 | 2.47E-129 |
| novel_pir242  | 347 | 0 | 11.82 | 0.001 | -13.52894242 | Down | 3.16E-130 | 2.46E-129 |
| novel_pir724  | 346 | 0 | 11.78 | 0.001 | -13.52405192 | Down | 7.46E-130 | 5.78E-129 |
| novel_pirl203 | 346 | 0 | 11.78 | 0.001 | -13.52405192 | Down | 7.46E-130 | 5.75E-129 |
| novel_pir243  | 346 | 0 | 11.78 | 0.001 | -13.52405192 | Down | 7.46E-130 | 5.73E-129 |
| novel_pir2107 | 345 | 0 | 11.75 | 0.001 | -13.52037314 | Down | 1.76E-129 | 1.35E-128 |
| novel_pir2168 | 344 | 0 | 11.72 | 0.001 | -13.51668495 | Down | 4.15E-129 | 3.17E-128 |
| novel_pir656  | 344 | 0 | 11.72 | 0.001 | -13.51668495 | Down | 4.15E-129 | 3.15E-128 |
| novel_pirl135 | 343 | 0 | 11.68 | 0.001 | -13.51175265 | Down | 9.81E-129 | 7.41E-128 |
| novel_pir283  | 343 | 0 | 11.68 | 0.001 | -13.51175265 | Down | 9.81E-129 | 7.38E-128 |
| novel_pirl02  | 342 | 0 | 11.65 | 0.001 | -13.50804233 | Down | 2.31E-128 | 1.74E-127 |
| novel_pir910  | 342 | 0 | 11.65 | 0.001 | -13.50804233 | Down | 2.31E-128 | 1.73E-127 |
| novel_pirl190 | 341 | 0 | 11.61 | 0.001 | -13.50308035 | Down | 5.46E-128 | 4.06E-127 |

|               |     |   |       |       |              |      |           |           |
|---------------|-----|---|-------|-------|--------------|------|-----------|-----------|
| novel_pir655  | 341 | 0 | 11.61 | 0.001 | -13.50308035 | Down | 5.46E-128 | 4.05E-127 |
| novel_pir1644 | 341 | 0 | 11.61 | 0.001 | -13.50308035 | Down | 5.46E-128 | 4.03E-127 |
| novel_pir203  | 340 | 0 | 11.58 | 0.001 | -13.49934763 | Down | 1.29E-127 | 9.48E-127 |
| novel_pir493  | 340 | 0 | 11.58 | 0.001 | -13.49934763 | Down | 1.29E-127 | 9.45E-127 |
| novel_pir2476 | 340 | 0 | 11.58 | 0.001 | -13.49934763 | Down | 1.29E-127 | 9.41E-127 |
| novel_pir2    | 340 | 0 | 11.58 | 0.001 | -13.49934763 | Down | 1.29E-127 | 9.37E-127 |
| novel_pir489  | 340 | 0 | 11.58 | 0.001 | -13.49934763 | Down | 1.29E-127 | 9.34E-127 |
| novel_pir2080 | 339 | 0 | 11.54 | 0.001 | -13.4943556  | Down | 3.04E-127 | 2.20E-126 |
| novel_pir66   | 339 | 0 | 11.54 | 0.001 | -13.4943556  | Down | 3.04E-127 | 2.19E-126 |
| novel_pir1296 | 339 | 0 | 11.54 | 0.001 | -13.4943556  | Down | 3.04E-127 | 2.18E-126 |
| novel_pir567  | 339 | 0 | 11.54 | 0.001 | -13.4943556  | Down | 3.04E-127 | 2.17E-126 |
| novel_pir2219 | 339 | 0 | 11.54 | 0.001 | -13.4943556  | Down | 3.04E-127 | 2.16E-126 |
| novel_pir1066 | 338 | 0 | 11.51 | 0.001 | -13.49060021 | Down | 7.19E-127 | 5.08E-126 |
| novel_pir995  | 338 | 0 | 11.51 | 0.001 | -13.49060021 | Down | 7.19E-127 | 5.07E-126 |
| novel_pir1080 | 338 | 0 | 11.51 | 0.001 | -13.49060021 | Down | 7.19E-127 | 5.05E-126 |
| novel_pir260  | 337 | 0 | 11.48 | 0.001 | -13.48683502 | Down | 1.70E-126 | 1.19E-125 |
| novel_pir949  | 336 | 0 | 11.44 | 0.001 | -13.48179943 | Down | 4.00E-126 | 2.79E-125 |
| novel_pir596  | 336 | 0 | 11.44 | 0.001 | -13.48179943 | Down | 4.00E-126 | 2.78E-125 |
| novel_pir940  | 336 | 0 | 11.44 | 0.001 | -13.48179943 | Down | 4.00E-126 | 2.77E-125 |
| novel_pir1140 | 335 | 0 | 11.41 | 0.001 | -13.47801117 | Down | 9.45E-126 | 6.52E-125 |
| novel_pir2103 | 335 | 0 | 11.41 | 0.001 | -13.47801117 | Down | 9.45E-126 | 6.49E-125 |
| novel_pir1629 | 335 | 0 | 11.41 | 0.001 | -13.47801117 | Down | 9.45E-126 | 6.47E-125 |
| novel_pir485  | 334 | 0 | 11.37 | 0.001 | -13.47294463 | Down | 2.23E-125 | 1.52E-124 |
| novel_pir1432 | 334 | 0 | 11.37 | 0.001 | -13.47294463 | Down | 2.23E-125 | 1.51E-124 |
| novel_pir1611 | 333 | 0 | 11.34 | 0.001 | -13.46913302 | Down | 5.27E-125 | 3.55E-124 |
| novel_pir1730 | 333 | 0 | 11.34 | 0.001 | -13.46913302 | Down | 5.27E-125 | 3.54E-124 |
| novel_pir2195 | 331 | 0 | 11.27 | 0.001 | -13.4601999  | Down | 2.93E-124 | 1.97E-123 |
| novel_pir1231 | 330 | 0 | 11.24 | 0.001 | -13.45635442 | Down | 6.93E-124 | 4.62E-123 |
| novel_pir1079 | 330 | 0 | 11.24 | 0.001 | -13.45635442 | Down | 6.93E-124 | 4.61E-123 |
| novel_pir1874 | 330 | 0 | 11.24 | 0.001 | -13.45635442 | Down | 6.93E-124 | 4.59E-123 |
| novel_pir1385 | 329 | 0 | 11.2  | 0.001 | -13.45121111 | Down | 1.63E-123 | 1.08E-122 |
| novel_pir74   | 328 | 0 | 11.17 | 0.001 | -13.44734157 | Down | 3.86E-123 | 2.54E-122 |
| novel_pir2224 | 328 | 0 | 11.17 | 0.001 | -13.44734157 | Down | 3.86E-123 | 2.53E-122 |
| novel_pir1958 | 328 | 0 | 11.17 | 0.001 | -13.44734157 | Down | 3.86E-123 | 2.52E-122 |
| novel_pir1459 | 328 | 0 | 11.17 | 0.001 | -13.44734157 | Down | 3.86E-123 | 2.51E-122 |
| novel_pir51   | 327 | 0 | 11.14 | 0.001 | -13.44346161 | Down | 9.11E-123 | 5.91E-122 |



|               |     |   |       |       |              |      |           |           |
|---------------|-----|---|-------|-------|--------------|------|-----------|-----------|
| novel_pir2227 | 326 | 0 | 11.1  | 0.001 | -13.43827206 | Down | 2.15E-122 | 1.39E-121 |
| novel_pir1979 | 326 | 0 | 11.1  | 0.001 | -13.43827206 | Down | 2.15E-122 | 1.39E-121 |
| novel_pir2266 | 325 | 0 | 11.07 | 0.001 | -13.4343676  | Down | 5.07E-122 | 3.24E-121 |
| novel_pir69   | 325 | 0 | 11.07 | 0.001 | -13.4343676  | Down | 5.07E-122 | 3.23E-121 |
| novel_pir211  | 325 | 0 | 11.07 | 0.001 | -13.4343676  | Down | 5.07E-122 | 3.22E-121 |
| novel_pir180  | 325 | 0 | 11.07 | 0.001 | -13.4343676  | Down | 5.07E-122 | 3.20E-121 |
| novel_pir2220 | 325 | 0 | 11.07 | 0.001 | -13.4343676  | Down | 5.07E-122 | 3.19E-121 |
| novel_pir1323 | 323 | 0 | 11    | 0.001 | -13.4252159  | Down | 2.83E-121 | 1.77E-120 |
| novel_pir973  | 323 | 0 | 11    | 0.001 | -13.4252159  | Down | 2.83E-121 | 1.76E-120 |
| novel_pir2260 | 323 | 0 | 11    | 0.001 | -13.4252159  | Down | 2.83E-121 | 1.76E-120 |
| novel_pir1794 | 322 | 0 | 10.97 | 0.001 | -13.42127591 | Down | 6.67E-121 | 4.13E-120 |
| novel_pir1993 | 321 | 0 | 10.93 | 0.001 | -13.41600578 | Down | 1.58E-120 | 9.72E-120 |
| novel_pir577  | 319 | 0 | 10.86 | 0.001 | -13.40673648 | Down | 8.78E-120 | 5.40E-119 |
| novel_pir1389 | 318 | 0 | 10.83 | 0.001 | -13.40274562 | Down | 2.07E-119 | 1.27E-118 |
| novel_pir1904 | 316 | 0 | 10.76 | 0.001 | -13.39339046 | Down | 1.15E-118 | 7.05E-118 |
| novel_pir1373 | 316 | 0 | 10.76 | 0.001 | -13.39339046 | Down | 1.15E-118 | 7.03E-118 |
| novel_pir2292 | 315 | 0 | 10.73 | 0.001 | -13.38936246 | Down | 2.72E-118 | 1.65E-117 |
| novel_pir389  | 315 | 0 | 10.73 | 0.001 | -13.38936246 | Down | 2.72E-118 | 1.65E-117 |
| novel_pir1443 | 315 | 0 | 10.73 | 0.001 | -13.38936246 | Down | 2.72E-118 | 1.64E-117 |
| novel_pir720  | 315 | 0 | 10.73 | 0.001 | -13.38936246 | Down | 2.72E-118 | 1.64E-117 |
| novel_pir1277 | 315 | 0 | 10.73 | 0.001 | -13.38936246 | Down | 2.72E-118 | 1.63E-117 |
| novel_pir175  | 315 | 0 | 10.73 | 0.001 | -13.38936246 | Down | 2.72E-118 | 1.63E-117 |
| novel_pir2273 | 314 | 0 | 10.69 | 0.001 | -13.38397423 | Down | 6.43E-118 | 3.83E-117 |
| novel_pir1490 | 313 | 0 | 10.66 | 0.001 | -13.37991982 | Down | 1.52E-117 | 9.01E-117 |
| novel_pir2357 | 313 | 0 | 10.66 | 0.001 | -13.37991982 | Down | 1.52E-117 | 8.98E-117 |
| novel_pir1918 | 312 | 0 | 10.63 | 0.001 | -13.37585398 | Down | 3.58E-117 | 2.11E-116 |
| novel_pir721  | 311 | 0 | 10.59 | 0.001 | -13.37041497 | Down | 8.46E-117 | 4.97E-116 |
| novel_pir1151 | 310 | 0 | 10.56 | 0.001 | -13.36632221 | Down | 2.00E-116 | 1.17E-115 |
| novel_pir535  | 309 | 0 | 10.52 | 0.001 | -13.36084708 | Down | 4.71E-116 | 2.75E-115 |
| novel_pir579  | 309 | 0 | 10.52 | 0.001 | -13.36084708 | Down | 4.71E-116 | 2.75E-115 |
| novel_pir627  | 309 | 0 | 10.52 | 0.001 | -13.36084708 | Down | 4.71E-116 | 2.74E-115 |
| novel_pir1392 | 309 | 0 | 10.52 | 0.001 | -13.36084708 | Down | 4.71E-116 | 2.73E-115 |
| novel_pir525  | 309 | 0 | 10.52 | 0.001 | -13.36084708 | Down | 4.71E-116 | 2.72E-115 |
| novel_pir1526 | 307 | 0 | 10.45 | 0.001 | -13.35121532 | Down | 2.63E-115 | 1.50E-114 |
| novel_pir1974 | 307 | 0 | 10.45 | 0.001 | -13.35121532 | Down | 2.63E-115 | 1.50E-114 |
| novel_pir1366 | 306 | 0 | 10.42 | 0.001 | -13.34706766 | Down | 6.20E-115 | 3.52E-114 |

|               |     |   |       |       |              |      |           |           |
|---------------|-----|---|-------|-------|--------------|------|-----------|-----------|
| novel_pir635  | 306 | 0 | 10.42 | 0.001 | -13.34706766 | Down | 6.20E-115 | 3.51E-114 |
| novel_pir1718 | 306 | 0 | 10.42 | 0.001 | -13.34706766 | Down | 6.20E-115 | 3.50E-114 |
| novel_pir1564 | 305 | 0 | 10.39 | 0.001 | -13.34290803 | Down | 1.46E-114 | 8.24E-114 |
| novel_pir950  | 305 | 0 | 10.39 | 0.001 | -13.34290803 | Down | 1.46E-114 | 8.22E-114 |
| novel_pir1739 | 305 | 0 | 10.39 | 0.001 | -13.34290803 | Down | 1.46E-114 | 8.19E-114 |
| novel_pir1029 | 304 | 0 | 10.35 | 0.001 | -13.33734315 | Down | 3.45E-114 | 1.93E-113 |
| novel_pir2233 | 304 | 0 | 10.35 | 0.001 | -13.33734315 | Down | 3.45E-114 | 1.92E-113 |
| novel_pir1335 | 304 | 0 | 10.35 | 0.001 | -13.33734315 | Down | 3.45E-114 | 1.92E-113 |
| novel_pir1445 | 303 | 0 | 10.32 | 0.001 | -13.33315535 | Down | 8.15E-114 | 4.51E-113 |
| novel_pir140  | 303 | 0 | 10.32 | 0.001 | -13.33315535 | Down | 8.15E-114 | 4.50E-113 |
| novel_pir1950 | 303 | 0 | 10.32 | 0.001 | -13.33315535 | Down | 8.15E-114 | 4.49E-113 |
| novel_pir2043 | 302 | 0 | 10.28 | 0.001 | -13.32755264 | Down | 1.92E-113 | 1.06E-112 |
| novel_pir38   | 302 | 0 | 10.28 | 0.001 | -13.32755264 | Down | 1.92E-113 | 1.05E-112 |
| novel_pir563  | 301 | 0 | 10.25 | 0.001 | -13.32333629 | Down | 4.54E-113 | 2.48E-112 |
| novel_pir303  | 301 | 0 | 10.25 | 0.001 | -13.32333629 | Down | 4.54E-113 | 2.47E-112 |
| novel_pir2181 | 301 | 0 | 10.25 | 0.001 | -13.32333629 | Down | 4.54E-113 | 2.46E-112 |
| novel_pir875  | 301 | 0 | 10.25 | 0.001 | -13.32333629 | Down | 4.54E-113 | 2.46E-112 |
| novel_pir882  | 301 | 0 | 10.25 | 0.001 | -13.32333629 | Down | 4.54E-113 | 2.45E-112 |
| novel_pir784  | 301 | 0 | 10.25 | 0.001 | -13.32333629 | Down | 4.54E-113 | 2.44E-112 |
| novel_pir1006 | 300 | 0 | 10.22 | 0.001 | -13.31910758 | Down | 1.07E-112 | 5.75E-112 |
| novel_pir1002 | 300 | 0 | 10.22 | 0.001 | -13.31910758 | Down | 1.07E-112 | 5.73E-112 |
| novel_pir1152 | 299 | 0 | 10.18 | 0.001 | -13.31344994 | Down | 2.53E-112 | 1.35E-111 |
| novel_pir1910 | 299 | 0 | 10.18 | 0.001 | -13.31344994 | Down | 2.53E-112 | 1.34E-111 |
| novel_pir546  | 298 | 0 | 10.15 | 0.001 | -13.30919211 | Down | 5.97E-112 | 3.16E-111 |
| novel_pir207  | 298 | 0 | 10.15 | 0.001 | -13.30919211 | Down | 5.97E-112 | 3.15E-111 |
| novel_pir121  | 298 | 0 | 10.15 | 0.001 | -13.30919211 | Down | 5.97E-112 | 3.14E-111 |
| novel_pir1932 | 296 | 0 | 10.08 | 0.001 | -13.29920802 | Down | 3.33E-111 | 1.74E-110 |
| novel_pir1234 | 296 | 0 | 10.08 | 0.001 | -13.29920802 | Down | 3.33E-111 | 1.74E-110 |
| novel_pir76   | 295 | 0 | 10.05 | 0.001 | -13.29490788 | Down | 7.86E-111 | 4.07E-110 |
| novel_pir1605 | 295 | 0 | 10.05 | 0.001 | -13.29490788 | Down | 7.86E-111 | 4.06E-110 |
| novel_pir860  | 294 | 0 | 10.01 | 0.001 | -13.28915435 | Down | 1.85E-110 | 9.56E-110 |
| novel_pir1826 | 294 | 0 | 10.01 | 0.001 | -13.28915435 | Down | 1.85E-110 | 9.54E-110 |
| novel_pir2474 | 294 | 0 | 10.01 | 0.001 | -13.28915435 | Down | 1.85E-110 | 9.51E-110 |
| novel_pir334  | 294 | 0 | 10.01 | 0.001 | -13.28915435 | Down | 1.85E-110 | 9.48E-110 |
| novel_pir387  | 293 | 0 | 9.98  | 0.001 | -13.2848241  | Down | 4.38E-110 | 2.23E-109 |
| novel_pir694  | 293 | 0 | 9.98  | 0.001 | -13.2848241  | Down | 4.38E-110 | 2.23E-109 |

|               |     |   |      |       |              |      |           |           |
|---------------|-----|---|------|-------|--------------|------|-----------|-----------|
| novel_pir832  | 292 | 0 | 9.94 | 0.001 | -13.27903014 | Down | 1.03E-109 | 5.23E-109 |
| novel_pir1408 | 292 | 0 | 9.94 | 0.001 | -13.27903014 | Down | 1.03E-109 | 5.21E-109 |
| novel_pir2210 | 292 | 0 | 9.94 | 0.001 | -13.27903014 | Down | 1.03E-109 | 5.20E-109 |
| novel_pir1072 | 292 | 0 | 9.94 | 0.001 | -13.27903014 | Down | 1.03E-109 | 5.19E-109 |
| novel_pir1922 | 291 | 0 | 9.91 | 0.001 | -13.27466934 | Down | 2.44E-109 | 1.22E-108 |
| novel_pir1603 | 291 | 0 | 9.91 | 0.001 | -13.27466934 | Down | 2.44E-109 | 1.22E-108 |
| novel_pir190  | 291 | 0 | 9.91 | 0.001 | -13.27466934 | Down | 2.44E-109 | 1.21E-108 |
| novel_pir1894 | 290 | 0 | 9.88 | 0.001 | -13.27029533 | Down | 5.76E-109 | 2.86E-108 |
| novel_pir368  | 289 | 0 | 9.84 | 0.001 | -13.2644426  | Down | 1.36E-108 | 6.73E-108 |
| novel_pir1037 | 288 | 0 | 9.81 | 0.001 | -13.26003742 | Down | 3.21E-108 | 1.58E-107 |
| novel_pir978  | 288 | 0 | 9.81 | 0.001 | -13.26003742 | Down | 3.21E-108 | 1.58E-107 |
| novel_pir1502 | 288 | 0 | 9.81 | 0.001 | -13.26003742 | Down | 3.21E-108 | 1.58E-107 |
| novel_pir2390 | 287 | 0 | 9.77 | 0.001 | -13.25414285 | Down | 7.57E-108 | 3.71E-107 |
| novel_pir483  | 287 | 0 | 9.77 | 0.001 | -13.25414285 | Down | 7.57E-108 | 3.70E-107 |
| novel_pir2153 | 287 | 0 | 9.77 | 0.001 | -13.25414285 | Down | 7.57E-108 | 3.69E-107 |
| novel_pir1688 | 287 | 0 | 9.77 | 0.001 | -13.25414285 | Down | 7.57E-108 | 3.68E-107 |
| novel_pir779  | 287 | 0 | 9.77 | 0.001 | -13.25414285 | Down | 7.57E-108 | 3.67E-107 |
| novel_pir541  | 286 | 0 | 9.74 | 0.001 | -13.24970606 | Down | 1.79E-107 | 8.65E-107 |
| novel_pir2197 | 285 | 0 | 9.71 | 0.001 | -13.24525558 | Down | 4.22E-107 | 2.04E-106 |
| novel_pir1853 | 285 | 0 | 9.71 | 0.001 | -13.24525558 | Down | 4.22E-107 | 2.03E-106 |
| novel_pir2050 | 285 | 0 | 9.71 | 0.001 | -13.24525558 | Down | 4.22E-107 | 2.03E-106 |
| novel_pir2441 | 284 | 0 | 9.67 | 0.001 | -13.23930017 | Down | 9.96E-107 | 4.77E-106 |
| novel_pir1965 | 284 | 0 | 9.67 | 0.001 | -13.23930017 | Down | 9.96E-107 | 4.76E-106 |
| novel_pir1173 | 284 | 0 | 9.67 | 0.001 | -13.23930017 | Down | 9.96E-107 | 4.74E-106 |
| novel_pir630  | 284 | 0 | 9.67 | 0.001 | -13.23930017 | Down | 9.96E-107 | 4.73E-106 |
| novel_pir281  | 284 | 0 | 9.67 | 0.001 | -13.23930017 | Down | 9.96E-107 | 4.72E-106 |
| novel_pir1745 | 283 | 0 | 9.64 | 0.001 | -13.23481743 | Down | 2.35E-106 | 1.11E-105 |
| novel_pir805  | 283 | 0 | 9.64 | 0.001 | -13.23481743 | Down | 2.35E-106 | 1.11E-105 |
| novel_pir1855 | 283 | 0 | 9.64 | 0.001 | -13.23481743 | Down | 2.35E-106 | 1.11E-105 |
| novel_pir460  | 282 | 0 | 9.6  | 0.001 | -13.22881869 | Down | 5.55E-106 | 2.60E-105 |
| novel_pir702  | 281 | 0 | 9.57 | 0.001 | -13.22430321 | Down | 1.31E-105 | 6.13E-105 |
| novel_pir1971 | 281 | 0 | 9.57 | 0.001 | -13.22430321 | Down | 1.31E-105 | 6.12E-105 |
| novel_pir1225 | 281 | 0 | 9.57 | 0.001 | -13.22430321 | Down | 1.31E-105 | 6.10E-105 |
| novel_pir497  | 281 | 0 | 9.57 | 0.001 | -13.22430321 | Down | 1.31E-105 | 6.08E-105 |
| novel_pir1508 | 280 | 0 | 9.54 | 0.001 | -13.21977355 | Down | 3.09E-105 | 1.43E-104 |
| novel_pir349  | 280 | 0 | 9.54 | 0.001 | -13.21977355 | Down | 3.09E-105 | 1.43E-104 |

|               |     |   |      |       |              |      |           |           |
|---------------|-----|---|------|-------|--------------|------|-----------|-----------|
| novel_pir183  | 280 | 0 | 9.54 | 0.001 | -13.21977355 | Down | 3.09E-105 | 1.43E-104 |
| novel_pir722  | 279 | 0 | 9.5  | 0.001 | -13.2137118  | Down | 7.30E-105 | 3.36E-104 |
| novel_pir1129 | 279 | 0 | 9.5  | 0.001 | -13.2137118  | Down | 7.30E-105 | 3.35E-104 |
| novel_pir1194 | 279 | 0 | 9.5  | 0.001 | -13.2137118  | Down | 7.30E-105 | 3.34E-104 |
| novel_pir866  | 278 | 0 | 9.47 | 0.001 | -13.20914871 | Down | 1.72E-104 | 7.87E-104 |
| novel_pir580  | 278 | 0 | 9.47 | 0.001 | -13.20914871 | Down | 1.72E-104 | 7.85E-104 |
| novel_pir1400 | 277 | 0 | 9.43 | 0.001 | -13.20304206 | Down | 4.07E-104 | 1.85E-103 |
| novel_pir1086 | 277 | 0 | 9.43 | 0.001 | -13.20304206 | Down | 4.07E-104 | 1.84E-103 |
| novel_pir1986 | 277 | 0 | 9.43 | 0.001 | -13.20304206 | Down | 4.07E-104 | 1.84E-103 |
| novel_pir1786 | 276 | 0 | 9.4  | 0.001 | -13.19844504 | Down | 9.60E-104 | 4.33E-103 |
| novel_pir1377 | 276 | 0 | 9.4  | 0.001 | -13.19844504 | Down | 9.60E-104 | 4.32E-103 |
| novel_pir187  | 275 | 0 | 9.37 | 0.001 | -13.19383333 | Down | 2.26E-103 | 1.02E-102 |
| novel_pir990  | 275 | 0 | 9.37 | 0.001 | -13.19383333 | Down | 2.26E-103 | 1.01E-102 |
| novel_pir1238 | 275 | 0 | 9.37 | 0.001 | -13.19383333 | Down | 2.26E-103 | 1.01E-102 |
| novel_pir2383 | 274 | 0 | 9.33 | 0.001 | -13.18766137 | Down | 5.35E-103 | 2.38E-102 |
| novel_pir97   | 274 | 0 | 9.33 | 0.001 | -13.18766137 | Down | 5.35E-103 | 2.38E-102 |
| novel_pir2363 | 273 | 0 | 9.3  | 0.001 | -13.183015   | Down | 1.26E-102 | 5.60E-102 |
| novel_pir1749 | 273 | 0 | 9.3  | 0.001 | -13.183015   | Down | 1.26E-102 | 5.59E-102 |
| novel_pir2137 | 272 | 0 | 9.26 | 0.001 | -13.17679648 | Down | 2.98E-102 | 1.32E-101 |
| novel_pir502  | 271 | 0 | 9.23 | 0.001 | -13.17211493 | Down | 7.03E-102 | 3.10E-101 |
| novel_pir98   | 271 | 0 | 9.23 | 0.001 | -13.17211493 | Down | 7.03E-102 | 3.09E-101 |
| novel_pir1336 | 270 | 0 | 9.19 | 0.001 | -13.16584915 | Down | 1.66E-101 | 7.26E-101 |
| novel_pir337  | 269 | 0 | 9.16 | 0.001 | -13.16113188 | Down | 3.92E-101 | 1.71E-100 |
| novel_pir1156 | 269 | 0 | 9.16 | 0.001 | -13.16113188 | Down | 3.92E-101 | 1.71E-100 |
| novel_pir1302 | 268 | 0 | 9.13 | 0.001 | -13.15639914 | Down | 9.25E-101 | 4.02E-100 |
| novel_pir754  | 268 | 0 | 9.13 | 0.001 | -13.15639914 | Down | 9.25E-101 | 4.01E-100 |
| novel_pir1715 | 268 | 0 | 9.13 | 0.001 | -13.15639914 | Down | 9.25E-101 | 4.00E-100 |
| novel_pir981  | 267 | 0 | 9.09 | 0.001 | -13.15006458 | Down | 2.18E-100 | 9.42E-100 |
| novel_pir1890 | 267 | 0 | 9.09 | 0.001 | -13.15006458 | Down | 2.18E-100 | 9.40E-100 |
| novel_pir1500 | 267 | 0 | 9.09 | 0.001 | -13.15006458 | Down | 2.18E-100 | 9.38E-100 |
| novel_pir1787 | 266 | 0 | 9.06 | 0.001 | -13.14529533 | Down | 5.15E-100 | 2.21E-99  |
| novel_pir48   | 266 | 0 | 9.06 | 0.001 | -13.14529533 | Down | 5.15E-100 | 2.20E-99  |
| novel_pir408  | 265 | 0 | 9.02 | 0.001 | -13.13891172 | Down | 1.22E-99  | 5.18E-99  |
| novel_pir1883 | 264 | 0 | 8.99 | 0.001 | -13.1341054  | Down | 2.87E-99  | 1.22E-98  |
| novel_pir1429 | 264 | 0 | 8.99 | 0.001 | -13.1341054  | Down | 2.87E-99  | 1.22E-98  |
| novel_pir9    | 263 | 0 | 8.96 | 0.001 | -13.12928302 | Down | 6.78E-99  | 2.86E-98  |

|                |     |   |      |       |              |      |          |          |
|----------------|-----|---|------|-------|--------------|------|----------|----------|
| novel_pirl681  | 263 | 0 | 8.96 | 0.001 | -13.12928302 | Down | 6.78E-99 | 2.85E-98 |
| novel_pirl992  | 262 | 0 | 8.92 | 0.001 | -13.12282799 | Down | 1.60E-98 | 6.72E-98 |
| novel_pirl2243 | 262 | 0 | 8.92 | 0.001 | -13.12282799 | Down | 1.60E-98 | 6.70E-98 |
| novel_pirl1153 | 261 | 0 | 8.89 | 0.001 | -13.1179677  | Down | 3.78E-98 | 1.58E-97 |
| novel_pirl2216 | 261 | 0 | 8.89 | 0.001 | -13.1179677  | Down | 3.78E-98 | 1.58E-97 |
| novel_pirl848  | 261 | 0 | 8.89 | 0.001 | -13.1179677  | Down | 3.78E-98 | 1.57E-97 |
| novel_pirl971  | 261 | 0 | 8.89 | 0.001 | -13.1179677  | Down | 3.78E-98 | 1.57E-97 |
| novel_pirl829  | 261 | 0 | 8.89 | 0.001 | -13.1179677  | Down | 3.78E-98 | 1.56E-97 |
| novel_pirl2078 | 261 | 0 | 8.89 | 0.001 | -13.1179677  | Down | 3.78E-98 | 1.56E-97 |
| novel_pirl845  | 261 | 0 | 8.89 | 0.001 | -13.1179677  | Down | 3.78E-98 | 1.56E-97 |
| novel_pirl293  | 260 | 0 | 8.85 | 0.001 | -13.11146174 | Down | 8.91E-98 | 3.67E-97 |
| novel_pirl391  | 259 | 0 | 8.82 | 0.001 | -13.10656294 | Down | 2.10E-97 | 8.64E-97 |
| novel_pirl2305 | 259 | 0 | 8.82 | 0.001 | -13.10656294 | Down | 2.10E-97 | 8.62E-97 |
| novel_pirl1105 | 259 | 0 | 8.82 | 0.001 | -13.10656294 | Down | 2.10E-97 | 8.61E-97 |
| novel_pirl425  | 259 | 0 | 8.82 | 0.001 | -13.10656294 | Down | 2.10E-97 | 8.59E-97 |
| novel_pirl801  | 259 | 0 | 8.82 | 0.001 | -13.10656294 | Down | 2.10E-97 | 8.57E-97 |
| novel_pirl2302 | 259 | 0 | 8.82 | 0.001 | -13.10656294 | Down | 2.10E-97 | 8.55E-97 |
| novel_pirl1009 | 258 | 0 | 8.79 | 0.001 | -13.10164745 | Down | 4.97E-97 | 2.01E-96 |
| novel_pirl209  | 257 | 0 | 8.75 | 0.001 | -13.0950673  | Down | 1.17E-96 | 4.74E-96 |
| novel_pirl892  | 257 | 0 | 8.75 | 0.001 | -13.0950673  | Down | 1.17E-96 | 4.73E-96 |
| novel_pirl310  | 257 | 0 | 8.75 | 0.001 | -13.0950673  | Down | 1.17E-96 | 4.72E-96 |
| novel_pirl1041 | 257 | 0 | 8.75 | 0.001 | -13.0950673  | Down | 1.17E-96 | 4.71E-96 |
| novel_pirl348  | 256 | 0 | 8.72 | 0.001 | -13.09011242 | Down | 2.77E-96 | 1.11E-95 |
| novel_pirl822  | 256 | 0 | 8.72 | 0.001 | -13.09011242 | Down | 2.77E-96 | 1.11E-95 |
| novel_pirl339  | 256 | 0 | 8.72 | 0.001 | -13.09011242 | Down | 2.77E-96 | 1.11E-95 |
| novel_pirl753  | 255 | 0 | 8.68 | 0.001 | -13.08347933 | Down | 6.53E-96 | 2.60E-95 |
| novel_pirl2212 | 255 | 0 | 8.68 | 0.001 | -13.08347933 | Down | 6.53E-96 | 2.60E-95 |
| novel_pirl1126 | 254 | 0 | 8.65 | 0.001 | -13.07848442 | Down | 1.54E-95 | 6.12E-95 |
| novel_pirl882  | 253 | 0 | 8.62 | 0.001 | -13.07347215 | Down | 3.64E-95 | 1.44E-94 |
| novel_pirl947  | 253 | 0 | 8.62 | 0.001 | -13.07347215 | Down | 3.64E-95 | 1.44E-94 |
| novel_pirl420  | 252 | 0 | 8.58 | 0.001 | -13.06676193 | Down | 8.59E-95 | 3.39E-94 |
| novel_pirl1096 | 251 | 0 | 8.55 | 0.001 | -13.0617087  | Down | 2.03E-94 | 7.98E-94 |
| novel_pirl122  | 251 | 0 | 8.55 | 0.001 | -13.0617087  | Down | 2.03E-94 | 7.96E-94 |
| novel_pirl8    | 251 | 0 | 8.55 | 0.001 | -13.0617087  | Down | 2.03E-94 | 7.95E-94 |
| novel_pirl1035 | 250 | 0 | 8.51 | 0.001 | -13.05494342 | Down | 4.78E-94 | 1.87E-93 |
| novel_pirl534  | 250 | 0 | 8.51 | 0.001 | -13.05494342 | Down | 4.78E-94 | 1.87E-93 |

|               |     |   |      |       |              |      |          |          |
|---------------|-----|---|------|-------|--------------|------|----------|----------|
| novel_pir584  | 250 | 0 | 8.51 | 0.001 | -13.05494342 | Down | 4.78E-94 | 1.86E-93 |
| novel_pir2253 | 249 | 0 | 8.48 | 0.001 | -13.04984855 | Down | 1.13E-93 | 4.39E-93 |
| novel_pir2229 | 249 | 0 | 8.48 | 0.001 | -13.04984855 | Down | 1.13E-93 | 4.38E-93 |
| novel_pir1248 | 249 | 0 | 8.48 | 0.001 | -13.04984855 | Down | 1.13E-93 | 4.37E-93 |
| novel_pir855  | 249 | 0 | 8.48 | 0.001 | -13.04984855 | Down | 1.13E-93 | 4.36E-93 |
| novel_pir2118 | 249 | 0 | 8.48 | 0.001 | -13.04984855 | Down | 1.13E-93 | 4.36E-93 |
| novel_pir1095 | 248 | 0 | 8.45 | 0.001 | -13.04473563 | Down | 2.67E-93 | 1.03E-92 |
| novel_pir135  | 248 | 0 | 8.45 | 0.001 | -13.04473563 | Down | 2.67E-93 | 1.02E-92 |
| novel_pir1128 | 248 | 0 | 8.45 | 0.001 | -13.04473563 | Down | 2.67E-93 | 1.02E-92 |
| novel_pir1800 | 248 | 0 | 8.45 | 0.001 | -13.04473563 | Down | 2.67E-93 | 1.02E-92 |
| novel_pir2372 | 247 | 0 | 8.41 | 0.001 | -13.03789009 | Down | 6.29E-93 | 2.40E-92 |
| novel_pir2111 | 247 | 0 | 8.41 | 0.001 | -13.03789009 | Down | 6.29E-93 | 2.39E-92 |
| novel_pir534  | 247 | 0 | 8.41 | 0.001 | -13.03789009 | Down | 6.29E-93 | 2.39E-92 |
| novel_pir1514 | 246 | 0 | 8.38 | 0.001 | -13.03273453 | Down | 1.49E-92 | 5.62E-92 |
| novel_pir1384 | 246 | 0 | 8.38 | 0.001 | -13.03273453 | Down | 1.49E-92 | 5.61E-92 |
| novel_pir1108 | 246 | 0 | 8.38 | 0.001 | -13.03273453 | Down | 1.49E-92 | 5.60E-92 |
| novel_pir444  | 244 | 0 | 8.31 | 0.001 | -13.02063276 | Down | 8.28E-92 | 3.12E-91 |
| novel_pir1098 | 243 | 0 | 8.28 | 0.001 | -13.01541505 | Down | 1.95E-91 | 7.34E-91 |
| novel_pir467  | 243 | 0 | 8.28 | 0.001 | -13.01541505 | Down | 1.95E-91 | 7.32E-91 |
| novel_pir1519 | 243 | 0 | 8.28 | 0.001 | -13.01541505 | Down | 1.95E-91 | 7.31E-91 |
| novel_pir12   | 243 | 0 | 8.28 | 0.001 | -13.01541505 | Down | 1.95E-91 | 7.29E-91 |
| novel_pir2165 | 243 | 0 | 8.28 | 0.001 | -13.01541505 | Down | 1.95E-91 | 7.28E-91 |
| novel_pir1092 | 242 | 0 | 8.24 | 0.001 | -13.00842862 | Down | 4.61E-91 | 1.72E-90 |
| novel_pir1662 | 241 | 0 | 8.21 | 0.001 | -13.00316651 | Down | 1.09E-90 | 4.04E-90 |
| novel_pir1416 | 241 | 0 | 8.21 | 0.001 | -13.00316651 | Down | 1.09E-90 | 4.03E-90 |
| novel_pir65   | 240 | 0 | 8.17 | 0.001 | -12.99612036 | Down | 2.57E-90 | 9.50E-90 |
| novel_pir1660 | 239 | 0 | 8.14 | 0.001 | -12.99081308 | Down | 6.06E-90 | 2.24E-89 |
| novel_pir1393 | 239 | 0 | 8.14 | 0.001 | -12.99081308 | Down | 6.06E-90 | 2.23E-89 |
| novel_pir1592 | 239 | 0 | 8.14 | 0.001 | -12.99081308 | Down | 6.06E-90 | 2.23E-89 |
| novel_pir1706 | 238 | 0 | 8.11 | 0.001 | -12.9854862  | Down | 1.43E-89 | 5.24E-89 |
| novel_pir590  | 238 | 0 | 8.11 | 0.001 | -12.9854862  | Down | 1.43E-89 | 5.23E-89 |
| novel_pir1770 | 238 | 0 | 8.11 | 0.001 | -12.9854862  | Down | 1.43E-89 | 5.22E-89 |
| novel_pir1462 | 238 | 0 | 8.11 | 0.001 | -12.9854862  | Down | 1.43E-89 | 5.21E-89 |
| novel_pir1650 | 238 | 0 | 8.11 | 0.001 | -12.9854862  | Down | 1.43E-89 | 5.20E-89 |
| novel_pir1723 | 237 | 0 | 8.07 | 0.001 | -12.97835296 | Down | 3.38E-89 | 1.23E-88 |
| novel_pir817  | 237 | 0 | 8.07 | 0.001 | -12.97835296 | Down | 3.38E-89 | 1.22E-88 |

|               |     |   |      |       |              |      |          |          |
|---------------|-----|---|------|-------|--------------|------|----------|----------|
| novel_pir821  | 237 | 0 | 8.07 | 0.001 | -12.97835296 | Down | 3.38E-89 | 1.22E-88 |
| novel_pir559  | 236 | 0 | 8.04 | 0.001 | -12.97297979 | Down | 7.98E-89 | 2.88E-88 |
| novel_pir2084 | 235 | 0 | 8    | 0.001 | -12.96578428 | Down | 1.88E-88 | 6.77E-88 |
| novel_pir464  | 235 | 0 | 8    | 0.001 | -12.96578428 | Down | 1.88E-88 | 6.76E-88 |
| novel_pir1430 | 235 | 0 | 8    | 0.001 | -12.96578428 | Down | 1.88E-88 | 6.75E-88 |
| novel_pir1019 | 234 | 0 | 7.97 | 0.001 | -12.96036401 | Down | 4.44E-88 | 1.59E-87 |
| novel_pir1978 | 233 | 0 | 7.93 | 0.001 | -12.95310515 | Down | 1.05E-87 | 3.75E-87 |
| novel_pir639  | 233 | 0 | 7.93 | 0.001 | -12.95310515 | Down | 1.05E-87 | 3.74E-87 |
| novel_pir658  | 233 | 0 | 7.93 | 0.001 | -12.95310515 | Down | 1.05E-87 | 3.73E-87 |
| novel_pir2236 | 233 | 0 | 7.93 | 0.001 | -12.95310515 | Down | 1.05E-87 | 3.72E-87 |
| novel_pir246  | 232 | 0 | 7.9  | 0.001 | -12.94763694 | Down | 2.48E-87 | 8.78E-87 |
| novel_pir2283 | 232 | 0 | 7.9  | 0.001 | -12.94763694 | Down | 2.48E-87 | 8.76E-87 |
| novel_pir576  | 232 | 0 | 7.9  | 0.001 | -12.94763694 | Down | 2.48E-87 | 8.74E-87 |
| novel_pir915  | 231 | 0 | 7.87 | 0.001 | -12.94214792 | Down | 5.84E-87 | 2.06E-86 |
| novel_pir859  | 231 | 0 | 7.87 | 0.001 | -12.94214792 | Down | 5.84E-87 | 2.05E-86 |
| novel_pir1533 | 230 | 0 | 7.83 | 0.001 | -12.93479659 | Down | 1.38E-86 | 4.83E-86 |
| novel_pir549  | 230 | 0 | 7.83 | 0.001 | -12.93479659 | Down | 1.38E-86 | 4.83E-86 |
| novel_pir249  | 229 | 0 | 7.8  | 0.001 | -12.92925841 | Down | 3.26E-86 | 1.14E-85 |
| novel_pir250  | 229 | 0 | 7.8  | 0.001 | -12.92925841 | Down | 3.26E-86 | 1.13E-85 |
| novel_pir822  | 229 | 0 | 7.8  | 0.001 | -12.92925841 | Down | 3.26E-86 | 1.13E-85 |
| novel_pir109  | 229 | 0 | 7.8  | 0.001 | -12.92925841 | Down | 3.26E-86 | 1.13E-85 |
| novel_pir496  | 229 | 0 | 7.8  | 0.001 | -12.92925841 | Down | 3.26E-86 | 1.13E-85 |
| novel_pir629  | 228 | 0 | 7.76 | 0.001 | -12.92184094 | Down | 7.69E-86 | 2.66E-85 |
| novel_pir327  | 228 | 0 | 7.76 | 0.001 | -12.92184094 | Down | 7.69E-86 | 2.65E-85 |
| novel_pir1870 | 228 | 0 | 7.76 | 0.001 | -12.92184094 | Down | 7.69E-86 | 2.65E-85 |
| novel_pir1060 | 228 | 0 | 7.76 | 0.001 | -12.92184094 | Down | 7.69E-86 | 2.64E-85 |
| novel_pir1593 | 227 | 0 | 7.73 | 0.001 | -12.9162527  | Down | 1.81E-85 | 6.23E-85 |
| novel_pir607  | 227 | 0 | 7.73 | 0.001 | -12.9162527  | Down | 1.81E-85 | 6.22E-85 |
| novel_pir1558 | 226 | 0 | 7.7  | 0.001 | -12.91064273 | Down | 4.28E-85 | 1.47E-84 |
| novel_pir46   | 226 | 0 | 7.7  | 0.001 | -12.91064273 | Down | 4.28E-85 | 1.46E-84 |
| novel_pir55   | 225 | 0 | 7.66 | 0.001 | -12.90312868 | Down | 1.01E-84 | 3.45E-84 |
| novel_pir835  | 225 | 0 | 7.66 | 0.001 | -12.90312868 | Down | 1.01E-84 | 3.44E-84 |
| novel_pir1793 | 225 | 0 | 7.66 | 0.001 | -12.90312868 | Down | 1.01E-84 | 3.43E-84 |
| novel_pir2144 | 224 | 0 | 7.63 | 0.001 | -12.89746734 | Down | 2.39E-84 | 8.08E-84 |
| novel_pir729  | 224 | 0 | 7.63 | 0.001 | -12.89746734 | Down | 2.39E-84 | 8.06E-84 |
| novel_pir35   | 224 | 0 | 7.63 | 0.001 | -12.89746734 | Down | 2.39E-84 | 8.05E-84 |

|               |     |   |      |       |              |      |          |          |
|---------------|-----|---|------|-------|--------------|------|----------|----------|
| novel_pir1312 | 223 | 0 | 7.59 | 0.001 | -12.88988417 | Down | 5.63E-84 | 1.90E-83 |
| novel_pir1278 | 222 | 0 | 7.56 | 0.001 | -12.88417052 | Down | 1.33E-83 | 4.47E-83 |
| novel_pir1259 | 222 | 0 | 7.56 | 0.001 | -12.88417052 | Down | 1.33E-83 | 4.46E-83 |
| novel_pir941  | 222 | 0 | 7.56 | 0.001 | -12.88417052 | Down | 1.33E-83 | 4.45E-83 |
| novel_pir2469 | 222 | 0 | 7.56 | 0.001 | -12.88417052 | Down | 1.33E-83 | 4.44E-83 |
| novel_pir1468 | 221 | 0 | 7.53 | 0.001 | -12.87843415 | Down | 3.14E-83 | 1.05E-82 |
| novel_pir1293 | 221 | 0 | 7.53 | 0.001 | -12.87843415 | Down | 3.14E-83 | 1.04E-82 |
| novel_pir2239 | 221 | 0 | 7.53 | 0.001 | -12.87843415 | Down | 3.14E-83 | 1.04E-82 |
| novel_pir919  | 221 | 0 | 7.53 | 0.001 | -12.87843415 | Down | 3.14E-83 | 1.04E-82 |
| novel_pir818  | 221 | 0 | 7.53 | 0.001 | -12.87843415 | Down | 3.14E-83 | 1.04E-82 |
| novel_pir11   | 220 | 0 | 7.49 | 0.001 | -12.87075    | Down | 7.41E-83 | 2.45E-82 |
| novel_pir488  | 220 | 0 | 7.49 | 0.001 | -12.87075    | Down | 7.41E-83 | 2.44E-82 |
| novel_pir689  | 220 | 0 | 7.49 | 0.001 | -12.87075    | Down | 7.41E-83 | 2.44E-82 |
| novel_pir459  | 219 | 0 | 7.46 | 0.001 | -12.86495992 | Down | 1.75E-82 | 5.74E-82 |
| novel_pir2126 | 219 | 0 | 7.46 | 0.001 | -12.86495992 | Down | 1.75E-82 | 5.73E-82 |
| novel_pir1722 | 219 | 0 | 7.46 | 0.001 | -12.86495992 | Down | 1.75E-82 | 5.72E-82 |
| novel_pir2225 | 219 | 0 | 7.46 | 0.001 | -12.86495992 | Down | 1.75E-82 | 5.71E-82 |
| novel_pir1418 | 218 | 0 | 7.42 | 0.001 | -12.85720347 | Down | 4.13E-82 | 1.35E-81 |
| novel_pir1146 | 218 | 0 | 7.42 | 0.001 | -12.85720347 | Down | 4.13E-82 | 1.34E-81 |
| novel_pir213  | 217 | 0 | 7.39 | 0.001 | -12.85135865 | Down | 9.74E-82 | 3.17E-81 |
| novel_pir100  | 217 | 0 | 7.39 | 0.001 | -12.85135865 | Down | 9.74E-82 | 3.16E-81 |
| novel_pir477  | 216 | 0 | 7.36 | 0.001 | -12.84549005 | Down | 2.30E-81 | 7.45E-81 |
| novel_pir1239 | 216 | 0 | 7.36 | 0.001 | -12.84549005 | Down | 2.30E-81 | 7.44E-81 |
| novel_pir2081 | 216 | 0 | 7.36 | 0.001 | -12.84549005 | Down | 2.30E-81 | 7.42E-81 |
| novel_pir465  | 216 | 0 | 7.36 | 0.001 | -12.84549005 | Down | 2.30E-81 | 7.41E-81 |
| novel_pir1328 | 216 | 0 | 7.36 | 0.001 | -12.84549005 | Down | 2.30E-81 | 7.40E-81 |
| novel_pir2347 | 215 | 0 | 7.32 | 0.001 | -12.83762793 | Down | 5.43E-81 | 1.74E-80 |
| novel_pir1047 | 215 | 0 | 7.32 | 0.001 | -12.83762793 | Down | 5.43E-81 | 1.74E-80 |
| novel_pir404  | 215 | 0 | 7.32 | 0.001 | -12.83762793 | Down | 5.43E-81 | 1.73E-80 |
| novel_pir1930 | 214 | 0 | 7.29 | 0.001 | -12.8317031  | Down | 1.28E-80 | 4.09E-80 |
| novel_pir139  | 213 | 0 | 7.25 | 0.001 | -12.82376528 | Down | 3.02E-80 | 9.63E-80 |
| novel_pir2148 | 213 | 0 | 7.25 | 0.001 | -12.82376528 | Down | 3.02E-80 | 9.61E-80 |
| novel_pir2298 | 212 | 0 | 7.22 | 0.001 | -12.81778312 | Down | 7.14E-80 | 2.27E-79 |
| novel_pir735  | 212 | 0 | 7.22 | 0.001 | -12.81778312 | Down | 7.14E-80 | 2.26E-79 |
| novel_pir1710 | 210 | 0 | 7.15 | 0.001 | -12.80372753 | Down | 3.98E-79 | 1.26E-78 |
| novel_pir104  | 209 | 0 | 7.12 | 0.001 | -12.79766153 | Down | 9.39E-79 | 2.96E-78 |



|               |     |   |      |       |              |      |          |          |
|---------------|-----|---|------|-------|--------------|------|----------|----------|
| novel_pirl423 | 209 | 0 | 7.12 | 0.001 | -12.79766153 | Down | 9.39E-79 | 2.96E-78 |
| novel_pir2183 | 208 | 0 | 7.08 | 0.001 | -12.78953364 | Down | 2.22E-78 | 6.97E-78 |
| novel_pir589  | 207 | 0 | 7.05 | 0.001 | -12.78340754 | Down | 5.23E-78 | 1.64E-77 |
| novel_pir2222 | 207 | 0 | 7.05 | 0.001 | -12.78340754 | Down | 5.23E-78 | 1.64E-77 |
| novel_pirl901 | 206 | 0 | 7.02 | 0.001 | -12.77725532 | Down | 1.23E-77 | 3.87E-77 |
| novel_pir2161 | 206 | 0 | 7.02 | 0.001 | -12.77725532 | Down | 1.23E-77 | 3.86E-77 |
| novel_pirl754 | 204 | 0 | 6.95 | 0.001 | -12.76279726 | Down | 6.88E-77 | 2.14E-76 |
| novel_pirl295 | 203 | 0 | 6.91 | 0.001 | -12.75447    | Down | 1.62E-76 | 5.05E-76 |
| novel_pir683  | 203 | 0 | 6.91 | 0.001 | -12.75447    | Down | 1.62E-76 | 5.04E-76 |
| novel_pirl094 | 203 | 0 | 6.91 | 0.001 | -12.75447    | Down | 1.62E-76 | 5.03E-76 |
| novel_pirl674 | 202 | 0 | 6.88 | 0.001 | -12.74819285 | Down | 3.83E-76 | 1.19E-75 |
| novel_pir723  | 202 | 0 | 6.88 | 0.001 | -12.74819285 | Down | 3.83E-76 | 1.18E-75 |
| novel_pir509  | 202 | 0 | 6.88 | 0.001 | -12.74819285 | Down | 3.83E-76 | 1.18E-75 |
| novel_pir455  | 202 | 0 | 6.88 | 0.001 | -12.74819285 | Down | 3.83E-76 | 1.18E-75 |
| novel_pir54   | 201 | 0 | 6.85 | 0.001 | -12.74188827 | Down | 9.05E-76 | 2.78E-75 |
| novel_pirl243 | 201 | 0 | 6.85 | 0.001 | -12.74188827 | Down | 9.05E-76 | 2.78E-75 |
| novel_pir948  | 200 | 0 | 6.81 | 0.001 | -12.73343908 | Down | 2.14E-75 | 6.53E-75 |
| novel_pir2114 | 200 | 0 | 6.81 | 0.001 | -12.73343908 | Down | 2.14E-75 | 6.52E-75 |
| novel_pirl187 | 200 | 0 | 6.81 | 0.001 | -12.73343908 | Down | 2.14E-75 | 6.51E-75 |
| novel_pirl897 | 199 | 0 | 6.78 | 0.001 | -12.72706956 | Down | 5.04E-75 | 1.54E-74 |
| novel_pirl251 | 199 | 0 | 6.78 | 0.001 | -12.72706956 | Down | 5.04E-75 | 1.53E-74 |
| novel_pir2352 | 199 | 0 | 6.78 | 0.001 | -12.72706956 | Down | 5.04E-75 | 1.53E-74 |
| novel_pir672  | 198 | 0 | 6.74 | 0.001 | -12.71853288 | Down | 1.19E-74 | 3.61E-74 |
| novel_pir891  | 198 | 0 | 6.74 | 0.001 | -12.71853288 | Down | 1.19E-74 | 3.60E-74 |
| novel_pir705  | 198 | 0 | 6.74 | 0.001 | -12.71853288 | Down | 1.19E-74 | 3.59E-74 |
| novel_pir258  | 197 | 0 | 6.71 | 0.001 | -12.71209705 | Down | 2.81E-74 | 8.47E-74 |
| novel_pirl117 | 196 | 0 | 6.67 | 0.001 | -12.70347105 | Down | 6.63E-74 | 2.00E-73 |
| novel_pirl150 | 195 | 0 | 6.64 | 0.001 | -12.69696753 | Down | 1.56E-73 | 4.70E-73 |
| novel_pirl761 | 195 | 0 | 6.64 | 0.001 | -12.69696753 | Down | 1.56E-73 | 4.70E-73 |
| novel_pir2267 | 195 | 0 | 6.64 | 0.001 | -12.69696753 | Down | 1.56E-73 | 4.69E-73 |
| novel_pir2307 | 194 | 0 | 6.61 | 0.001 | -12.69043456 | Down | 3.69E-73 | 1.11E-72 |
| novel_pir2009 | 194 | 0 | 6.61 | 0.001 | -12.69043456 | Down | 3.69E-73 | 1.10E-72 |
| novel_pir909  | 194 | 0 | 6.61 | 0.001 | -12.69043456 | Down | 3.69E-73 | 1.10E-72 |
| novel_pirl589 | 193 | 0 | 6.57 | 0.001 | -12.68167766 | Down | 8.72E-73 | 2.60E-72 |
| novel_pirl625 | 193 | 0 | 6.57 | 0.001 | -12.68167766 | Down | 8.72E-73 | 2.59E-72 |
| novel_pir286  | 193 | 0 | 6.57 | 0.001 | -12.68167766 | Down | 8.72E-73 | 2.59E-72 |

|               |     |   |      |       |              |      |          |          |
|---------------|-----|---|------|-------|--------------|------|----------|----------|
| novel_pir745  | 193 | 0 | 6.57 | 0.001 | -12.68167766 | Down | 8.72E-73 | 2.58E-72 |
| novel_pir2102 | 192 | 0 | 6.54 | 0.001 | -12.67507492 | Down | 2.06E-72 | 6.09E-72 |
| novel_pir952  | 191 | 0 | 6.5  | 0.001 | -12.666224   | Down | 4.86E-72 | 1.44E-71 |
| novel_pir2313 | 191 | 0 | 6.5  | 0.001 | -12.666224   | Down | 4.86E-72 | 1.43E-71 |
| novel_pir1513 | 191 | 0 | 6.5  | 0.001 | -12.666224   | Down | 4.86E-72 | 1.43E-71 |
| novel_pir831  | 190 | 0 | 6.47 | 0.001 | -12.65955    | Down | 1.15E-71 | 3.37E-71 |
| novel_pir762  | 190 | 0 | 6.47 | 0.001 | -12.65955    | Down | 1.15E-71 | 3.37E-71 |
| novel_pir1553 | 190 | 0 | 6.47 | 0.001 | -12.65955    | Down | 1.15E-71 | 3.36E-71 |
| novel_pir838  | 189 | 0 | 6.44 | 0.001 | -12.65284497 | Down | 2.71E-71 | 7.92E-71 |
| novel_pir1342 | 188 | 0 | 6.4  | 0.001 | -12.64385619 | Down | 6.39E-71 | 1.86E-70 |
| novel_pir2021 | 188 | 0 | 6.4  | 0.001 | -12.64385619 | Down | 6.39E-71 | 1.86E-70 |
| novel_pir868  | 188 | 0 | 6.4  | 0.001 | -12.64385619 | Down | 6.39E-71 | 1.86E-70 |
| novel_pir953  | 187 | 0 | 6.37 | 0.001 | -12.63707766 | Down | 1.51E-70 | 4.38E-70 |
| novel_pir734  | 187 | 0 | 6.37 | 0.001 | -12.63707766 | Down | 1.51E-70 | 4.37E-70 |
| novel_pir1163 | 187 | 0 | 6.37 | 0.001 | -12.63707766 | Down | 1.51E-70 | 4.37E-70 |
| novel_pir1362 | 187 | 0 | 6.37 | 0.001 | -12.63707766 | Down | 1.51E-70 | 4.36E-70 |
| novel_pir1925 | 187 | 0 | 6.37 | 0.001 | -12.63707766 | Down | 1.51E-70 | 4.35E-70 |
| novel_pir1505 | 186 | 0 | 6.33 | 0.001 | -12.62798978 | Down | 3.56E-70 | 1.03E-69 |
| novel_pir1560 | 186 | 0 | 6.33 | 0.001 | -12.62798978 | Down | 3.56E-70 | 1.02E-69 |
| novel_pir280  | 185 | 0 | 6.3  | 0.001 | -12.62113611 | Down | 8.40E-70 | 2.41E-69 |
| novel_pir643  | 184 | 0 | 6.27 | 0.001 | -12.61424973 | Down | 1.98E-69 | 5.69E-69 |
| novel_pir2249 | 183 | 0 | 6.23 | 0.001 | -12.60501645 | Down | 4.68E-69 | 1.34E-68 |
| novel_pir2377 | 183 | 0 | 6.23 | 0.001 | -12.60501645 | Down | 4.68E-69 | 1.34E-68 |
| novel_pir1966 | 183 | 0 | 6.23 | 0.001 | -12.60501645 | Down | 4.68E-69 | 1.34E-68 |
| novel_pir1286 | 182 | 0 | 6.2  | 0.001 | -12.5980525  | Down | 1.11E-68 | 3.15E-68 |
| novel_pir2290 | 182 | 0 | 6.2  | 0.001 | -12.5980525  | Down | 1.11E-68 | 3.15E-68 |
| novel_pir1658 | 182 | 0 | 6.2  | 0.001 | -12.5980525  | Down | 1.11E-68 | 3.14E-68 |
| novel_pir323  | 182 | 0 | 6.2  | 0.001 | -12.5980525  | Down | 1.11E-68 | 3.14E-68 |
| novel_pir1315 | 181 | 0 | 6.16 | 0.001 | -12.58871464 | Down | 2.61E-68 | 7.39E-68 |
| novel_pir1473 | 181 | 0 | 6.16 | 0.001 | -12.58871464 | Down | 2.61E-68 | 7.38E-68 |
| novel_pir1622 | 178 | 0 | 6.06 | 0.001 | -12.56510208 | Down | 3.43E-67 | 9.69E-67 |
| novel_pir1529 | 178 | 0 | 6.06 | 0.001 | -12.56510208 | Down | 3.43E-67 | 9.68E-67 |
| novel_pir1470 | 178 | 0 | 6.06 | 0.001 | -12.56510208 | Down | 3.43E-67 | 9.66E-67 |
| novel_pir2458 | 178 | 0 | 6.06 | 0.001 | -12.56510208 | Down | 3.43E-67 | 9.65E-67 |
| novel_pir1119 | 178 | 0 | 6.06 | 0.001 | -12.56510208 | Down | 3.43E-67 | 9.64E-67 |
| novel_pir1419 | 178 | 0 | 6.06 | 0.001 | -12.56510208 | Down | 3.43E-67 | 9.62E-67 |

|               |     |   |      |       |              |      |          |          |
|---------------|-----|---|------|-------|--------------|------|----------|----------|
| novel_pirl607 | 178 | 0 | 6.06 | 0.001 | -12.56510208 | Down | 3.43E-67 | 9.61E-67 |
| novel_pir874  | 178 | 0 | 6.06 | 0.001 | -12.56510208 | Down | 3.43E-67 | 9.59E-67 |
| novel_pirl048 | 177 | 0 | 6.03 | 0.001 | -12.55794229 | Down | 8.10E-67 | 2.26E-66 |
| novel_pirl577 | 176 | 0 | 5.99 | 0.001 | -12.54834029 | Down | 1.91E-66 | 5.33E-66 |
| novel_pirl799 | 176 | 0 | 5.99 | 0.001 | -12.54834029 | Down | 1.91E-66 | 5.32E-66 |
| novel_pir2442 | 175 | 0 | 5.96 | 0.001 | -12.54109662 | Down | 4.51E-66 | 1.25E-65 |
| novel_pirl537 | 175 | 0 | 5.96 | 0.001 | -12.54109662 | Down | 4.51E-66 | 1.25E-65 |
| novel_pir248  | 175 | 0 | 5.96 | 0.001 | -12.54109662 | Down | 4.51E-66 | 1.25E-65 |
| novel_pirl692 | 174 | 0 | 5.93 | 0.001 | -12.53381639 | Down | 1.06E-65 | 2.94E-65 |
| novel_pir970  | 174 | 0 | 5.93 | 0.001 | -12.53381639 | Down | 1.06E-65 | 2.93E-65 |
| novel_pir2186 | 172 | 0 | 5.86 | 0.001 | -12.51668495 | Down | 5.93E-65 | 1.63E-64 |
| novel_pirl321 | 172 | 0 | 5.86 | 0.001 | -12.51668495 | Down | 5.93E-65 | 1.63E-64 |
| novel_pirl018 | 172 | 0 | 5.86 | 0.001 | -12.51668495 | Down | 5.93E-65 | 1.63E-64 |
| novel_pirl783 | 172 | 0 | 5.86 | 0.001 | -12.51668495 | Down | 5.93E-65 | 1.63E-64 |
| novel_pir2454 | 171 | 0 | 5.82 | 0.001 | -12.50680344 | Down | 1.40E-64 | 3.83E-64 |
| novel_pirl110 | 171 | 0 | 5.82 | 0.001 | -12.50680344 | Down | 1.40E-64 | 3.83E-64 |
| novel_pir2343 | 170 | 0 | 5.79 | 0.001 | -12.49934763 | Down | 3.31E-64 | 9.02E-64 |
| novel_pirl270 | 170 | 0 | 5.79 | 0.001 | -12.49934763 | Down | 3.31E-64 | 9.00E-64 |
| novel_pir742  | 170 | 0 | 5.79 | 0.001 | -12.49934763 | Down | 3.31E-64 | 8.99E-64 |
| novel_pirl802 | 170 | 0 | 5.79 | 0.001 | -12.49934763 | Down | 3.31E-64 | 8.98E-64 |
| novel_pir2274 | 167 | 0 | 5.69 | 0.001 | -12.47421294 | Down | 4.35E-63 | 1.18E-62 |
| novel_pir979  | 167 | 0 | 5.69 | 0.001 | -12.47421294 | Down | 4.35E-63 | 1.18E-62 |
| novel_pir2285 | 167 | 0 | 5.69 | 0.001 | -12.47421294 | Down | 4.35E-63 | 1.18E-62 |
| novel_pir918  | 167 | 0 | 5.69 | 0.001 | -12.47421294 | Down | 4.35E-63 | 1.17E-62 |
| novel_pir2180 | 167 | 0 | 5.69 | 0.001 | -12.47421294 | Down | 4.35E-63 | 1.17E-62 |
| novel_pirl758 | 165 | 0 | 5.62 | 0.001 | -12.45635442 | Down | 2.42E-62 | 6.51E-62 |
| novel_pirl806 | 165 | 0 | 5.62 | 0.001 | -12.45635442 | Down | 2.42E-62 | 6.50E-62 |
| novel_pirl906 | 164 | 0 | 5.59 | 0.001 | -12.44863257 | Down | 5.72E-62 | 1.53E-61 |
| novel_pir2355 | 164 | 0 | 5.59 | 0.001 | -12.44863257 | Down | 5.72E-62 | 1.53E-61 |
| novel_pir2045 | 164 | 0 | 5.59 | 0.001 | -12.44863257 | Down | 5.72E-62 | 1.53E-61 |
| novel_pirl661 | 164 | 0 | 5.59 | 0.001 | -12.44863257 | Down | 5.72E-62 | 1.53E-61 |
| novel_pirl877 | 163 | 0 | 5.55 | 0.001 | -12.43827206 | Down | 1.35E-61 | 3.60E-61 |
| novel_pir712  | 163 | 0 | 5.55 | 0.001 | -12.43827206 | Down | 1.35E-61 | 3.59E-61 |
| novel_pirl873 | 163 | 0 | 5.55 | 0.001 | -12.43827206 | Down | 1.35E-61 | 3.59E-61 |
| novel_pirl948 | 162 | 0 | 5.52 | 0.001 | -12.43045255 | Down | 3.19E-61 | 8.46E-61 |
| novel_pirl125 | 161 | 0 | 5.48 | 0.001 | -12.41996018 | Down | 7.52E-61 | 1.99E-60 |

|               |     |   |      |       |              |      |          |          |
|---------------|-----|---|------|-------|--------------|------|----------|----------|
| novel_pirl872 | 157 | 0 | 5.35 | 0.001 | -12.38532318 | Down | 2.33E-59 | 6.18E-59 |
| novel_pirl675 | 157 | 0 | 5.35 | 0.001 | -12.38532318 | Down | 2.33E-59 | 6.17E-59 |
| novel_pirl525 | 157 | 0 | 5.35 | 0.001 | -12.38532318 | Down | 2.33E-59 | 6.16E-59 |
| novel_pir29   | 157 | 0 | 5.35 | 0.001 | -12.38532318 | Down | 2.33E-59 | 6.15E-59 |
| novel_pir828  | 157 | 0 | 5.35 | 0.001 | -12.38532318 | Down | 2.33E-59 | 6.14E-59 |
| novel_pirl860 | 156 | 0 | 5.31 | 0.001 | -12.37449615 | Down | 5.51E-59 | 1.45E-58 |
| novel_pirl719 | 155 | 0 | 5.28 | 0.001 | -12.36632221 | Down | 1.30E-58 | 3.41E-58 |
| novel_pir2190 | 155 | 0 | 5.28 | 0.001 | -12.36632221 | Down | 1.30E-58 | 3.41E-58 |
| novel_pir2116 | 154 | 0 | 5.24 | 0.001 | -12.3553511  | Down | 3.07E-58 | 8.04E-58 |
| novel_pirl708 | 154 | 0 | 5.24 | 0.001 | -12.3553511  | Down | 3.07E-58 | 8.03E-58 |
| novel_pirl169 | 153 | 0 | 5.21 | 0.001 | -12.34706766 | Down | 7.25E-58 | 1.89E-57 |
| novel_pirl089 | 153 | 0 | 5.21 | 0.001 | -12.34706766 | Down | 7.25E-58 | 1.89E-57 |
| novel_pir301  | 152 | 0 | 5.18 | 0.001 | -12.33873638 | Down | 1.71E-57 | 4.44E-57 |
| novel_pirl784 | 151 | 0 | 5.14 | 0.001 | -12.32755264 | Down | 4.04E-57 | 1.05E-56 |
| novel_pir814  | 150 | 0 | 5.11 | 0.001 | -12.31910758 | Down | 9.53E-57 | 2.46E-56 |
| novel_pirl178 | 149 | 0 | 5.07 | 0.001 | -12.30777003 | Down | 2.25E-56 | 5.81E-56 |
| novel_pir2430 | 149 | 0 | 5.07 | 0.001 | -12.30777003 | Down | 2.25E-56 | 5.80E-56 |
| novel_pir657  | 149 | 0 | 5.07 | 0.001 | -12.30777003 | Down | 2.25E-56 | 5.79E-56 |
| novel_pir794  | 148 | 0 | 5.04 | 0.001 | -12.29920802 | Down | 5.31E-56 | 1.37E-55 |
| novel_pir929  | 148 | 0 | 5.04 | 0.001 | -12.29920802 | Down | 5.31E-56 | 1.36E-55 |
| novel_pir916  | 147 | 0 | 5.01 | 0.001 | -12.29059489 | Down | 1.25E-55 | 3.21E-55 |
| novel_pir310  | 147 | 0 | 5.01 | 0.001 | -12.29059489 | Down | 1.25E-55 | 3.21E-55 |
| novel_pirl487 | 146 | 0 | 4.97 | 0.001 | -12.27903014 | Down | 2.96E-55 | 7.57E-55 |
| novel_pir424  | 145 | 0 | 4.94 | 0.001 | -12.27029533 | Down | 6.98E-55 | 1.78E-54 |
| novel_pir732  | 145 | 0 | 4.94 | 0.001 | -12.27029533 | Down | 6.98E-55 | 1.78E-54 |
| novel_pirl698 | 145 | 0 | 4.94 | 0.001 | -12.27029533 | Down | 6.98E-55 | 1.78E-54 |
| novel_pir236  | 145 | 0 | 4.94 | 0.001 | -12.27029533 | Down | 6.98E-55 | 1.78E-54 |
| novel_pir744  | 144 | 0 | 4.9  | 0.001 | -12.25856603 | Down | 1.65E-54 | 4.19E-54 |
| novel_pir614  | 143 | 0 | 4.87 | 0.001 | -12.24970606 | Down | 3.89E-54 | 9.86E-54 |
| novel_pirl773 | 143 | 0 | 4.87 | 0.001 | -12.24970606 | Down | 3.89E-54 | 9.84E-54 |
| novel_pirl122 | 143 | 0 | 4.87 | 0.001 | -12.24970606 | Down | 3.89E-54 | 9.83E-54 |
| novel_pirl372 | 142 | 0 | 4.84 | 0.001 | -12.24079133 | Down | 9.18E-54 | 2.32E-53 |
| novel_pirl969 | 142 | 0 | 4.84 | 0.001 | -12.24079133 | Down | 9.18E-54 | 2.31E-53 |
| novel_pir2167 | 142 | 0 | 4.84 | 0.001 | -12.24079133 | Down | 9.18E-54 | 2.31E-53 |
| novel_pirl947 | 141 | 0 | 4.8  | 0.001 | -12.22881869 | Down | 2.17E-53 | 5.45E-53 |
| novel_pir2465 | 141 | 0 | 4.8  | 0.001 | -12.22881869 | Down | 2.17E-53 | 5.44E-53 |

|               |     |   |      |       |              |      |          |          |
|---------------|-----|---|------|-------|--------------|------|----------|----------|
| novel_pir2117 | 141 | 0 | 4.8  | 0.001 | -12.22881869 | Down | 2.17E-53 | 5.43E-53 |
| novel_pir394  | 140 | 0 | 4.77 | 0.001 | -12.21977355 | Down | 5.12E-53 | 1.28E-52 |
| novel_pir1093 | 140 | 0 | 4.77 | 0.001 | -12.21977355 | Down | 5.12E-53 | 1.28E-52 |
| novel_pir1809 | 140 | 0 | 4.77 | 0.001 | -12.21977355 | Down | 5.12E-53 | 1.28E-52 |
| novel_pir935  | 138 | 0 | 4.7  | 0.001 | -12.19844504 | Down | 2.85E-52 | 7.10E-52 |
| novel_pir593  | 138 | 0 | 4.7  | 0.001 | -12.19844504 | Down | 2.85E-52 | 7.09E-52 |
| novel_pir844  | 138 | 0 | 4.7  | 0.001 | -12.19844504 | Down | 2.85E-52 | 7.08E-52 |
| novel_pir2025 | 138 | 0 | 4.7  | 0.001 | -12.19844504 | Down | 2.85E-52 | 7.07E-52 |
| novel_pir2061 | 137 | 0 | 4.67 | 0.001 | -12.18920683 | Down | 6.73E-52 | 1.67E-51 |
| novel_pir798  | 137 | 0 | 4.67 | 0.001 | -12.18920683 | Down | 6.73E-52 | 1.66E-51 |
| novel_pir1240 | 137 | 0 | 4.67 | 0.001 | -12.18920683 | Down | 6.73E-52 | 1.66E-51 |
| novel_pir585  | 136 | 0 | 4.63 | 0.001 | -12.17679648 | Down | 1.59E-51 | 3.91E-51 |
| novel_pir1797 | 136 | 0 | 4.63 | 0.001 | -12.17679648 | Down | 1.59E-51 | 3.91E-51 |
| novel_pir2350 | 136 | 0 | 4.63 | 0.001 | -12.17679648 | Down | 1.59E-51 | 3.90E-51 |
| novel_pir1242 | 135 | 0 | 4.6  | 0.001 | -12.16741815 | Down | 3.75E-51 | 9.20E-51 |
| novel_pir1991 | 135 | 0 | 4.6  | 0.001 | -12.16741815 | Down | 3.75E-51 | 9.19E-51 |
| novel_pir2238 | 135 | 0 | 4.6  | 0.001 | -12.16741815 | Down | 3.75E-51 | 9.18E-51 |
| novel_pir1171 | 134 | 0 | 4.56 | 0.001 | -12.15481811 | Down | 8.85E-51 | 2.16E-50 |
| novel_pir925  | 134 | 0 | 4.56 | 0.001 | -12.15481811 | Down | 8.85E-51 | 2.16E-50 |
| novel_pir2150 | 133 | 0 | 4.53 | 0.001 | -12.14529533 | Down | 2.09E-50 | 5.09E-50 |
| novel_pir266  | 133 | 0 | 4.53 | 0.001 | -12.14529533 | Down | 2.09E-50 | 5.09E-50 |
| novel_pir64   | 132 | 0 | 4.5  | 0.001 | -12.13570929 | Down | 4.93E-50 | 1.20E-49 |
| novel_pir2213 | 132 | 0 | 4.5  | 0.001 | -12.13570929 | Down | 4.93E-50 | 1.20E-49 |
| novel_pir318  | 132 | 0 | 4.5  | 0.001 | -12.13570929 | Down | 4.93E-50 | 1.20E-49 |
| novel_pir994  | 132 | 0 | 4.5  | 0.001 | -12.13570929 | Down | 4.93E-50 | 1.19E-49 |
| novel_pir1612 | 131 | 0 | 4.46 | 0.001 | -12.12282799 | Down | 1.16E-49 | 2.81E-49 |
| novel_pir1790 | 131 | 0 | 4.46 | 0.001 | -12.12282799 | Down | 1.16E-49 | 2.81E-49 |
| novel_pir1138 | 131 | 0 | 4.46 | 0.001 | -12.12282799 | Down | 1.16E-49 | 2.81E-49 |
| novel_pir1472 | 130 | 0 | 4.43 | 0.001 | -12.11309098 | Down | 2.75E-49 | 6.61E-49 |
| novel_pir827  | 130 | 0 | 4.43 | 0.001 | -12.11309098 | Down | 2.75E-49 | 6.60E-49 |
| novel_pir2141 | 128 | 0 | 4.36 | 0.001 | -12.09011242 | Down | 1.53E-48 | 3.68E-48 |
| novel_pir879  | 128 | 0 | 4.36 | 0.001 | -12.09011242 | Down | 1.53E-48 | 3.67E-48 |
| novel_pir1683 | 127 | 0 | 4.33 | 0.001 | -12.08015131 | Down | 3.61E-48 | 8.65E-48 |
| novel_pir1147 | 127 | 0 | 4.33 | 0.001 | -12.08015131 | Down | 3.61E-48 | 8.64E-48 |
| novel_pir1212 | 126 | 0 | 4.29 | 0.001 | -12.06676193 | Down | 8.53E-48 | 2.04E-47 |
| novel_pir2145 | 125 | 0 | 4.26 | 0.001 | -12.05663772 | Down | 2.01E-47 | 4.80E-47 |

|               |     |   |      |       |              |      |          |          |
|---------------|-----|---|------|-------|--------------|------|----------|----------|
| novel_pir2284 | 125 | 0 | 4.26 | 0.001 | -12.05663772 | Down | 2.01E-47 | 4.80E-47 |
| novel_pir1399 | 124 | 0 | 4.22 | 0.001 | -12.04302728 | Down | 4.75E-47 | 1.13E-46 |
| novel_pir500  | 124 | 0 | 4.22 | 0.001 | -12.04302728 | Down | 4.75E-47 | 1.13E-46 |
| novel_pir2146 | 124 | 0 | 4.22 | 0.001 | -12.04302728 | Down | 4.75E-47 | 1.13E-46 |
| novel_pir1211 | 124 | 0 | 4.22 | 0.001 | -12.04302728 | Down | 4.75E-47 | 1.13E-46 |
| novel_pir2125 | 123 | 0 | 4.19 | 0.001 | -12.03273453 | Down | 1.12E-46 | 2.66E-46 |
| novel_pir2341 | 123 | 0 | 4.19 | 0.001 | -12.03273453 | Down | 1.12E-46 | 2.65E-46 |
| novel_pir2344 | 122 | 0 | 4.15 | 0.001 | -12.01889562 | Down | 2.65E-46 | 6.25E-46 |
| novel_pir405  | 122 | 0 | 4.15 | 0.001 | -12.01889562 | Down | 2.65E-46 | 6.24E-46 |
| novel_pir1182 | 122 | 0 | 4.15 | 0.001 | -12.01889562 | Down | 2.65E-46 | 6.23E-46 |
| novel_pir846  | 121 | 0 | 4.12 | 0.001 | -12.00842862 | Down | 6.25E-46 | 1.47E-45 |
| novel_pir1536 | 120 | 0 | 4.09 | 0.001 | -11.99788513 | Down | 1.48E-45 | 3.46E-45 |
| novel_pir34   | 120 | 0 | 4.09 | 0.001 | -11.99788513 | Down | 1.48E-45 | 3.45E-45 |
| novel_pir644  | 119 | 0 | 4.05 | 0.001 | -11.98370619 | Down | 3.48E-45 | 8.14E-45 |
| novel_pir2475 | 119 | 0 | 4.05 | 0.001 | -11.98370619 | Down | 3.48E-45 | 8.13E-45 |
| novel_pir1725 | 119 | 0 | 4.05 | 0.001 | -11.98370619 | Down | 3.48E-45 | 8.12E-45 |
| novel_pir543  | 119 | 0 | 4.05 | 0.001 | -11.98370619 | Down | 3.48E-45 | 8.11E-45 |
| novel_pir1076 | 118 | 0 | 4.02 | 0.001 | -11.97297979 | Down | 8.22E-45 | 1.91E-44 |
| novel_pir2246 | 118 | 0 | 4.02 | 0.001 | -11.97297979 | Down | 8.22E-45 | 1.91E-44 |
| novel_pir1811 | 118 | 0 | 4.02 | 0.001 | -11.97297979 | Down | 8.22E-45 | 1.91E-44 |
| novel_pir1530 | 118 | 0 | 4.02 | 0.001 | -11.97297979 | Down | 8.22E-45 | 1.90E-44 |
| novel_pir2203 | 117 | 0 | 3.98 | 0.001 | -11.95855272 | Down | 1.94E-44 | 4.49E-44 |
| novel_pir1143 | 117 | 0 | 3.98 | 0.001 | -11.95855272 | Down | 1.94E-44 | 4.48E-44 |
| novel_pir1361 | 117 | 0 | 3.98 | 0.001 | -11.95855272 | Down | 1.94E-44 | 4.48E-44 |
| novel_pir987  | 117 | 0 | 3.98 | 0.001 | -11.95855272 | Down | 1.94E-44 | 4.47E-44 |
| novel_pir72   | 116 | 0 | 3.95 | 0.001 | -11.94763694 | Down | 4.58E-44 | 1.05E-43 |
| novel_pir1554 | 115 | 0 | 3.92 | 0.001 | -11.93663794 | Down | 1.08E-43 | 2.48E-43 |
| novel_pir803  | 114 | 0 | 3.88 | 0.001 | -11.92184094 | Down | 2.55E-43 | 5.84E-43 |
| novel_pir2242 | 113 | 0 | 3.85 | 0.001 | -11.91064273 | Down | 6.02E-43 | 1.38E-42 |
| novel_pir2320 | 113 | 0 | 3.85 | 0.001 | -11.91064273 | Down | 6.02E-43 | 1.38E-42 |
| novel_pir472  | 113 | 0 | 3.85 | 0.001 | -11.91064273 | Down | 6.02E-43 | 1.37E-42 |
| novel_pir284  | 113 | 0 | 3.85 | 0.001 | -11.91064273 | Down | 6.02E-43 | 1.37E-42 |
| novel_pir1228 | 112 | 0 | 3.81 | 0.001 | -11.89557528 | Down | 1.42E-42 | 3.24E-42 |
| novel_pir355  | 112 | 0 | 3.81 | 0.001 | -11.89557528 | Down | 1.42E-42 | 3.23E-42 |
| novel_pir2445 | 112 | 0 | 3.81 | 0.001 | -11.89557528 | Down | 1.42E-42 | 3.23E-42 |
| novel_pir1071 | 111 | 0 | 3.78 | 0.001 | -11.88417052 | Down | 3.36E-42 | 7.61E-42 |

|                |     |   |      |       |              |      |          |          |
|----------------|-----|---|------|-------|--------------|------|----------|----------|
| novel_pirl049  | 110 | 0 | 3.75 | 0.001 | -11.87267488 | Down | 7.92E-42 | 1.79E-41 |
| novel_pirl903  | 110 | 0 | 3.75 | 0.001 | -11.87267488 | Down | 7.92E-42 | 1.79E-41 |
| novel_pirl202  | 110 | 0 | 3.75 | 0.001 | -11.87267488 | Down | 7.92E-42 | 1.79E-41 |
| novel_pirl768  | 109 | 0 | 3.71 | 0.001 | -11.85720347 | Down | 1.87E-41 | 4.22E-41 |
| novel_pirl981  | 108 | 0 | 3.68 | 0.001 | -11.84549005 | Down | 4.41E-41 | 9.95E-41 |
| novel_pirl771  | 107 | 0 | 3.64 | 0.001 | -11.82972274 | Down | 1.04E-40 | 2.35E-40 |
| novel_pirl796  | 107 | 0 | 3.64 | 0.001 | -11.82972274 | Down | 1.04E-40 | 2.34E-40 |
| novel_pirl332  | 106 | 0 | 3.61 | 0.001 | -11.81778312 | Down | 2.46E-40 | 5.52E-40 |
| novel_pirl2194 | 106 | 0 | 3.61 | 0.001 | -11.81778312 | Down | 2.46E-40 | 5.51E-40 |
| novel_pirl422  | 105 | 0 | 3.58 | 0.001 | -11.80574387 | Down | 5.81E-40 | 1.30E-39 |
| novel_pirl333  | 105 | 0 | 3.58 | 0.001 | -11.80574387 | Down | 5.81E-40 | 1.30E-39 |
| novel_pirl201  | 105 | 0 | 3.58 | 0.001 | -11.80574387 | Down | 5.81E-40 | 1.30E-39 |
| novel_pirl227  | 105 | 0 | 3.58 | 0.001 | -11.80574387 | Down | 5.81E-40 | 1.29E-39 |
| novel_pirl2079 | 104 | 0 | 3.54 | 0.001 | -11.78953364 | Down | 1.37E-39 | 3.05E-39 |
| novel_pirl518  | 103 | 0 | 3.51 | 0.001 | -11.77725532 | Down | 3.23E-39 | 7.20E-39 |
| novel_pirl837  | 102 | 0 | 3.47 | 0.001 | -11.76071995 | Down | 7.63E-39 | 1.70E-38 |
| novel_pirl063  | 102 | 0 | 3.47 | 0.001 | -11.76071995 | Down | 7.63E-39 | 1.69E-38 |
| novel_pirl549  | 101 | 0 | 3.44 | 0.001 | -11.74819285 | Down | 1.80E-38 | 3.99E-38 |
| novel_pirl750  | 101 | 0 | 3.44 | 0.001 | -11.74819285 | Down | 1.80E-38 | 3.99E-38 |
| novel_pirl491  | 101 | 0 | 3.44 | 0.001 | -11.74819285 | Down | 1.80E-38 | 3.98E-38 |
| novel_pirl21   | 100 | 0 | 3.41 | 0.001 | -11.73555602 | Down | 4.25E-38 | 9.37E-38 |
| novel_pirl944  | 100 | 0 | 3.41 | 0.001 | -11.73555602 | Down | 4.25E-38 | 9.36E-38 |
| novel_pirl654  | 98  | 0 | 3.34 | 0.001 | -11.70563239 | Down | 2.37E-37 | 5.21E-37 |
| novel_pirl619  | 97  | 0 | 3.3  | 0.001 | -11.68825031 | Down | 5.59E-37 | 1.23E-36 |
| novel_pirl782  | 97  | 0 | 3.3  | 0.001 | -11.68825031 | Down | 5.59E-37 | 1.23E-36 |
| novel_pirl2264 | 97  | 0 | 3.3  | 0.001 | -11.68825031 | Down | 5.59E-37 | 1.23E-36 |
| novel_pirl2370 | 95  | 0 | 3.24 | 0.001 | -11.6617781  | Down | 3.12E-36 | 6.81E-36 |
| novel_pirl287  | 95  | 0 | 3.24 | 0.001 | -11.6617781  | Down | 3.12E-36 | 6.80E-36 |
| novel_pirl483  | 94  | 0 | 3.2  | 0.001 | -11.64385619 | Down | 7.36E-36 | 1.60E-35 |
| novel_pirl276  | 93  | 0 | 3.17 | 0.001 | -11.63026713 | Down | 1.74E-35 | 3.77E-35 |
| novel_pirl880  | 93  | 0 | 3.17 | 0.001 | -11.63026713 | Down | 1.74E-35 | 3.77E-35 |
| novel_pirl2147 | 93  | 0 | 3.17 | 0.001 | -11.63026713 | Down | 1.74E-35 | 3.77E-35 |
| novel_pirl968  | 93  | 0 | 3.17 | 0.001 | -11.63026713 | Down | 1.74E-35 | 3.76E-35 |
| novel_pirl309  | 92  | 0 | 3.13 | 0.001 | -11.61194694 | Down | 4.10E-35 | 8.86E-35 |
| novel_pirl714  | 92  | 0 | 3.13 | 0.001 | -11.61194694 | Down | 4.10E-35 | 8.85E-35 |
| novel_pirl357  | 92  | 0 | 3.13 | 0.001 | -11.61194694 | Down | 4.10E-35 | 8.84E-35 |

|               |    |   |      |       |              |      |          |          |
|---------------|----|---|------|-------|--------------|------|----------|----------|
| novel_pirl946 | 91 | 0 | 3.1  | 0.001 | -11.5980525  | Down | 9.68E-35 | 2.08E-34 |
| novel_pir403  | 90 | 0 | 3.06 | 0.001 | -11.57931594 | Down | 2.28E-34 | 4.91E-34 |
| novel_pir696  | 89 | 0 | 3.03 | 0.001 | -11.56510208 | Down | 5.39E-34 | 1.16E-33 |
| novel_pir886  | 89 | 0 | 3.03 | 0.001 | -11.56510208 | Down | 5.39E-34 | 1.16E-33 |
| novel_pir478  | 88 | 0 | 3    | 0.001 | -11.55074679 | Down | 1.27E-33 | 2.72E-33 |
| novel_pir776  | 88 | 0 | 3    | 0.001 | -11.55074679 | Down | 1.27E-33 | 2.72E-33 |
| novel_pir322  | 88 | 0 | 3    | 0.001 | -11.55074679 | Down | 1.27E-33 | 2.72E-33 |
| novel_pirl79  | 88 | 0 | 3    | 0.001 | -11.55074679 | Down | 1.27E-33 | 2.72E-33 |
| novel_pir624  | 87 | 0 | 2.96 | 0.001 | -11.53138146 | Down | 3.00E-33 | 6.40E-33 |
| novel_pir924  | 87 | 0 | 2.96 | 0.001 | -11.53138146 | Down | 3.00E-33 | 6.39E-33 |
| novel_pirl289 | 87 | 0 | 2.96 | 0.001 | -11.53138146 | Down | 3.00E-33 | 6.38E-33 |
| novel_pir912  | 86 | 0 | 2.93 | 0.001 | -11.51668495 | Down | 7.09E-33 | 1.50E-32 |
| novel_pirl410 | 86 | 0 | 2.93 | 0.001 | -11.51668495 | Down | 7.09E-33 | 1.50E-32 |
| novel_pir2259 | 86 | 0 | 2.93 | 0.001 | -11.51668495 | Down | 7.09E-33 | 1.50E-32 |
| novel_pir2106 | 85 | 0 | 2.89 | 0.001 | -11.49685378 | Down | 1.67E-32 | 3.54E-32 |
| novel_pirl132 | 84 | 0 | 2.86 | 0.001 | -11.48179943 | Down | 3.95E-32 | 8.34E-32 |
| novel_pirl861 | 84 | 0 | 2.86 | 0.001 | -11.48179943 | Down | 3.95E-32 | 8.33E-32 |
| novel_pir2431 | 84 | 0 | 2.86 | 0.001 | -11.48179943 | Down | 3.95E-32 | 8.33E-32 |
| novel_pirl235 | 83 | 0 | 2.83 | 0.001 | -11.46658634 | Down | 9.32E-32 | 1.96E-31 |
| novel_pirl051 | 83 | 0 | 2.83 | 0.001 | -11.46658634 | Down | 9.32E-32 | 1.96E-31 |
| novel_pirl741 | 82 | 0 | 2.79 | 0.001 | -11.44604941 | Down | 2.20E-31 | 4.62E-31 |
| novel_pirl844 | 82 | 0 | 2.79 | 0.001 | -11.44604941 | Down | 2.20E-31 | 4.62E-31 |
| novel_pir2440 | 80 | 0 | 2.72 | 0.001 | -11.40939094 | Down | 1.23E-30 | 2.57E-30 |
| novel_pir2261 | 79 | 0 | 2.69 | 0.001 | -11.39339046 | Down | 2.89E-30 | 6.05E-30 |
| novel_pir307  | 79 | 0 | 2.69 | 0.001 | -11.39339046 | Down | 2.89E-30 | 6.04E-30 |
| novel_pir960  | 78 | 0 | 2.66 | 0.001 | -11.37721053 | Down | 6.83E-30 | 1.42E-29 |
| novel_pirl352 | 78 | 0 | 2.66 | 0.001 | -11.37721053 | Down | 6.83E-30 | 1.42E-29 |
| novel_pirl869 | 78 | 0 | 2.66 | 0.001 | -11.37721053 | Down | 6.83E-30 | 1.42E-29 |
| novel_pirl835 | 77 | 0 | 2.62 | 0.001 | -11.3553511  | Down | 1.61E-29 | 3.35E-29 |
| novel_pirl686 | 77 | 0 | 2.62 | 0.001 | -11.3553511  | Down | 1.61E-29 | 3.35E-29 |
| novel_pir30   | 77 | 0 | 2.62 | 0.001 | -11.3553511  | Down | 1.61E-29 | 3.34E-29 |
| novel_pir810  | 77 | 0 | 2.62 | 0.001 | -11.3553511  | Down | 1.61E-29 | 3.34E-29 |
| novel_pir2428 | 75 | 0 | 2.55 | 0.001 | -11.31628153 | Down | 8.99E-29 | 1.85E-28 |
| novel_pirl810 | 74 | 0 | 2.52 | 0.001 | -11.29920802 | Down | 2.12E-28 | 4.37E-28 |
| novel_pir2426 | 74 | 0 | 2.52 | 0.001 | -11.29920802 | Down | 2.12E-28 | 4.36E-28 |
| novel_pir2473 | 73 | 0 | 2.49 | 0.001 | -11.28193003 | Down | 5.01E-28 | 1.03E-27 |



|                |    |   |      |       |              |      |          |          |
|----------------|----|---|------|-------|--------------|------|----------|----------|
| novel_pir1555  | 73 | 0 | 2.49 | 0.001 | -11.28193003 | Down | 5.01E-28 | 1.03E-27 |
| novel_pir2345  | 72 | 0 | 2.45 | 0.001 | -11.25856603 | Down | 1.18E-27 | 2.42E-27 |
| novel_pir361   | 72 | 0 | 2.45 | 0.001 | -11.25856603 | Down | 1.18E-27 | 2.42E-27 |
| novel_pir1085  | 71 | 0 | 2.42 | 0.001 | -11.24079133 | Down | 2.79E-27 | 5.69E-27 |
| novel_pir1521  | 71 | 0 | 2.42 | 0.001 | -11.24079133 | Down | 2.79E-27 | 5.69E-27 |
| novel_pir2342  | 71 | 0 | 2.42 | 0.001 | -11.24079133 | Down | 2.79E-27 | 5.68E-27 |
| novel_pir1124  | 71 | 0 | 2.42 | 0.001 | -11.24079133 | Down | 2.79E-27 | 5.68E-27 |
| novel_pir2028  | 71 | 0 | 2.42 | 0.001 | -11.24079133 | Down | 2.79E-27 | 5.67E-27 |
| novel_pir1268  | 70 | 0 | 2.38 | 0.001 | -11.21674586 | Down | 6.58E-27 | 1.34E-26 |
| novel_pir1550  | 69 | 0 | 2.35 | 0.001 | -11.19844504 | Down | 1.55E-26 | 3.15E-26 |
| mmu_pir_016069 | 69 | 0 | 2.35 | 0.001 | -11.19844504 | Down | 1.55E-26 | 3.15E-26 |
| novel_pir777   | 69 | 0 | 2.35 | 0.001 | -11.19844504 | Down | 1.55E-26 | 3.14E-26 |
| novel_pir2337  | 69 | 0 | 2.35 | 0.001 | -11.19844504 | Down | 1.55E-26 | 3.14E-26 |
| novel_pir2019  | 68 | 0 | 2.32 | 0.001 | -11.17990909 | Down | 3.67E-26 | 7.39E-26 |
| novel_pir1081  | 68 | 0 | 2.32 | 0.001 | -11.17990909 | Down | 3.67E-26 | 7.38E-26 |
| novel_pir2187  | 67 | 0 | 2.28 | 0.001 | -11.15481811 | Down | 8.66E-26 | 1.74E-25 |
| novel_pir1923  | 67 | 0 | 2.28 | 0.001 | -11.15481811 | Down | 8.66E-26 | 1.74E-25 |
| novel_pir1959  | 66 | 0 | 2.25 | 0.001 | -11.13570929 | Down | 2.04E-25 | 4.10E-25 |
| novel_pir962   | 66 | 0 | 2.25 | 0.001 | -11.13570929 | Down | 2.04E-25 | 4.09E-25 |
| novel_pir2188  | 65 | 0 | 2.21 | 0.001 | -11.10983065 | Down | 4.83E-25 | 9.65E-25 |
| novel_pir661   | 65 | 0 | 2.21 | 0.001 | -11.10983065 | Down | 4.83E-25 | 9.64E-25 |
| novel_pir1938  | 64 | 0 | 2.18 | 0.001 | -11.09011242 | Down | 1.14E-24 | 2.27E-24 |
| novel_pir1299  | 64 | 0 | 2.18 | 0.001 | -11.09011242 | Down | 1.14E-24 | 2.27E-24 |
| novel_pir522   | 64 | 0 | 2.18 | 0.001 | -11.09011242 | Down | 1.14E-24 | 2.27E-24 |
| novel_pir1257  | 63 | 0 | 2.15 | 0.001 | -11.07012094 | Down | 2.69E-24 | 5.35E-24 |
| novel_pir896   | 63 | 0 | 2.15 | 0.001 | -11.07012094 | Down | 2.69E-24 | 5.34E-24 |
| novel_pir1193  | 63 | 0 | 2.15 | 0.001 | -11.07012094 | Down | 2.69E-24 | 5.34E-24 |
| novel_pir2143  | 60 | 0 | 2.04 | 0.001 | -10.99435344 | Down | 3.54E-23 | 6.98E-23 |
| novel_pir1841  | 60 | 0 | 2.04 | 0.001 | -10.99435344 | Down | 3.54E-23 | 6.98E-23 |
| novel_pir453   | 60 | 0 | 2.04 | 0.001 | -10.99435344 | Down | 3.54E-23 | 6.97E-23 |
| novel_pir2196  | 60 | 0 | 2.04 | 0.001 | -10.99435344 | Down | 3.54E-23 | 6.96E-23 |
| novel_pir1776  | 59 | 0 | 2.01 | 0.001 | -10.97297979 | Down | 8.35E-23 | 1.64E-22 |
| novel_pir760   | 58 | 0 | 1.98 | 0.001 | -10.95128471 | Down | 1.97E-22 | 3.87E-22 |
| novel_pir1300  | 58 | 0 | 1.98 | 0.001 | -10.95128471 | Down | 1.97E-22 | 3.87E-22 |
| novel_pir476   | 58 | 0 | 1.98 | 0.001 | -10.95128471 | Down | 1.97E-22 | 3.86E-22 |
| novel_pir1464  | 58 | 0 | 1.98 | 0.001 | -10.95128471 | Down | 1.97E-22 | 3.86E-22 |

|               |    |   |      |       |              |      |          |          |
|---------------|----|---|------|-------|--------------|------|----------|----------|
| novel_pir867  | 58 | 0 | 1.98 | 0.001 | -10.95128471 | Down | 1.97E-22 | 3.85E-22 |
| novel_pir1839 | 58 | 0 | 1.98 | 0.001 | -10.95128471 | Down | 1.97E-22 | 3.85E-22 |
| novel_pir251  | 57 | 0 | 1.94 | 0.001 | -10.92184094 | Down | 4.65E-22 | 9.08E-22 |
| novel_pir2124 | 57 | 0 | 1.94 | 0.001 | -10.92184094 | Down | 4.65E-22 | 9.07E-22 |
| novel_pir1563 | 56 | 0 | 1.91 | 0.001 | -10.89935692 | Down | 1.10E-21 | 2.13E-21 |
| novel_pir1198 | 56 | 0 | 1.91 | 0.001 | -10.89935692 | Down | 1.10E-21 | 2.13E-21 |
| novel_pir692  | 56 | 0 | 1.91 | 0.001 | -10.89935692 | Down | 1.10E-21 | 2.13E-21 |
| novel_pir1197 | 56 | 0 | 1.91 | 0.001 | -10.89935692 | Down | 1.10E-21 | 2.13E-21 |
| novel_pir885  | 55 | 0 | 1.87 | 0.001 | -10.86882255 | Down | 2.59E-21 | 5.01E-21 |
| novel_pir80   | 55 | 0 | 1.87 | 0.001 | -10.86882255 | Down | 2.59E-21 | 5.00E-21 |
| novel_pir2151 | 55 | 0 | 1.87 | 0.001 | -10.86882255 | Down | 2.59E-21 | 5.00E-21 |
| novel_pir1980 | 54 | 0 | 1.84 | 0.001 | -10.84549005 | Down | 6.12E-21 | 1.18E-20 |
| novel_pir530  | 54 | 0 | 1.84 | 0.001 | -10.84549005 | Down | 6.12E-21 | 1.18E-20 |
| novel_pir325  | 54 | 0 | 1.84 | 0.001 | -10.84549005 | Down | 6.12E-21 | 1.17E-20 |
| novel_pir2069 | 54 | 0 | 1.84 | 0.001 | -10.84549005 | Down | 6.12E-21 | 1.17E-20 |
| novel_pir699  | 54 | 0 | 1.84 | 0.001 | -10.84549005 | Down | 6.12E-21 | 1.17E-20 |
| novel_pir565  | 54 | 0 | 1.84 | 0.001 | -10.84549005 | Down | 6.12E-21 | 1.17E-20 |
| novel_pir2063 | 53 | 0 | 1.8  | 0.001 | -10.81378119 | Down | 1.44E-20 | 2.76E-20 |
| novel_pir1000 | 53 | 0 | 1.8  | 0.001 | -10.81378119 | Down | 1.44E-20 | 2.76E-20 |
| novel_pir716  | 52 | 0 | 1.77 | 0.001 | -10.78953364 | Down | 3.41E-20 | 6.49E-20 |
| novel_pir1353 | 52 | 0 | 1.77 | 0.001 | -10.78953364 | Down | 3.41E-20 | 6.48E-20 |
| novel_pir2065 | 52 | 0 | 1.77 | 0.001 | -10.78953364 | Down | 3.41E-20 | 6.48E-20 |
| novel_pir2459 | 52 | 0 | 1.77 | 0.001 | -10.78953364 | Down | 3.41E-20 | 6.47E-20 |
| novel_pir2030 | 52 | 0 | 1.77 | 0.001 | -10.78953364 | Down | 3.41E-20 | 6.46E-20 |
| novel_pir2326 | 51 | 0 | 1.74 | 0.001 | -10.76487159 | Down | 8.04E-20 | 1.52E-19 |
| novel_pir499  | 50 | 0 | 1.7  | 0.001 | -10.73131903 | Down | 1.90E-19 | 3.59E-19 |
| novel_pir977  | 50 | 0 | 1.7  | 0.001 | -10.73131903 | Down | 1.90E-19 | 3.58E-19 |
| novel_pir739  | 49 | 0 | 1.67 | 0.001 | -10.70563239 | Down | 4.48E-19 | 8.44E-19 |
| novel_pir1699 | 49 | 0 | 1.67 | 0.001 | -10.70563239 | Down | 4.48E-19 | 8.43E-19 |
| novel_pir267  | 49 | 0 | 1.67 | 0.001 | -10.70563239 | Down | 4.48E-19 | 8.43E-19 |
| novel_pir2208 | 49 | 0 | 1.67 | 0.001 | -10.70563239 | Down | 4.48E-19 | 8.42E-19 |
| novel_pir471  | 48 | 0 | 1.63 | 0.001 | -10.67065625 | Down | 1.06E-18 | 1.98E-18 |
| novel_pir965  | 48 | 0 | 1.63 | 0.001 | -10.67065625 | Down | 1.06E-18 | 1.98E-18 |
| novel_pir2152 | 47 | 0 | 1.6  | 0.001 | -10.64385619 | Down | 2.50E-18 | 4.67E-18 |
| novel_pir1087 | 47 | 0 | 1.6  | 0.001 | -10.64385619 | Down | 2.50E-18 | 4.66E-18 |
| novel_pir2328 | 47 | 0 | 1.6  | 0.001 | -10.64385619 | Down | 2.50E-18 | 4.66E-18 |

|               |    |   |      |       |              |      |          |          |
|---------------|----|---|------|-------|--------------|------|----------|----------|
| novel_pirl606 | 46 | 0 | 1.57 | 0.001 | -10.61654884 | Down | 5.89E-18 | 1.10E-17 |
| novel_pirl929 | 46 | 0 | 1.57 | 0.001 | -10.61654884 | Down | 5.89E-18 | 1.10E-17 |
| novel_pirl165 | 46 | 0 | 1.57 | 0.001 | -10.61654884 | Down | 5.89E-18 | 1.10E-17 |
| novel_pir2361 | 45 | 0 | 1.53 | 0.001 | -10.57931594 | Down | 1.39E-17 | 2.58E-17 |
| novel_pirl254 | 45 | 0 | 1.53 | 0.001 | -10.57931594 | Down | 1.39E-17 | 2.58E-17 |
| novel_pirl344 | 45 | 0 | 1.53 | 0.001 | -10.57931594 | Down | 1.39E-17 | 2.57E-17 |
| novel_pirl200 | 44 | 0 | 1.5  | 0.001 | -10.55074679 | Down | 3.28E-17 | 6.07E-17 |
| novel_pirl367 | 44 | 0 | 1.5  | 0.001 | -10.55074679 | Down | 3.28E-17 | 6.06E-17 |
| novel_pir2177 | 44 | 0 | 1.5  | 0.001 | -10.55074679 | Down | 3.28E-17 | 6.06E-17 |
| novel_pir2163 | 44 | 0 | 1.5  | 0.001 | -10.55074679 | Down | 3.28E-17 | 6.05E-17 |
| novel_pir94   | 44 | 0 | 1.5  | 0.001 | -10.55074679 | Down | 3.28E-17 | 6.05E-17 |
| novel_pirl570 | 44 | 0 | 1.5  | 0.001 | -10.55074679 | Down | 3.28E-17 | 6.04E-17 |
| novel_pirl396 | 44 | 0 | 1.5  | 0.001 | -10.55074679 | Down | 3.28E-17 | 6.04E-17 |
| novel_pirl34  | 43 | 0 | 1.46 | 0.001 | -10.51175265 | Down | 7.75E-17 | 1.42E-16 |
| novel_pir2472 | 43 | 0 | 1.46 | 0.001 | -10.51175265 | Down | 7.75E-17 | 1.42E-16 |
| novel_pir385  | 43 | 0 | 1.46 | 0.001 | -10.51175265 | Down | 7.75E-17 | 1.42E-16 |
| novel_pirl781 | 43 | 0 | 1.46 | 0.001 | -10.51175265 | Down | 7.75E-17 | 1.42E-16 |
| novel_pirl713 | 43 | 0 | 1.46 | 0.001 | -10.51175265 | Down | 7.75E-17 | 1.41E-16 |
| novel_pirl687 | 42 | 0 | 1.43 | 0.001 | -10.48179943 | Down | 1.83E-16 | 3.33E-16 |
| novel_pir2294 | 42 | 0 | 1.43 | 0.001 | -10.48179943 | Down | 1.83E-16 | 3.33E-16 |
| novel_pir592  | 42 | 0 | 1.43 | 0.001 | -10.48179943 | Down | 1.83E-16 | 3.33E-16 |
| novel_pirl168 | 42 | 0 | 1.43 | 0.001 | -10.48179943 | Down | 1.83E-16 | 3.32E-16 |
| novel_pirl972 | 42 | 0 | 1.43 | 0.001 | -10.48179943 | Down | 1.83E-16 | 3.32E-16 |
| novel_pirl703 | 41 | 0 | 1.4  | 0.001 | -10.45121111 | Down | 4.32E-16 | 7.82E-16 |
| novel_pir847  | 41 | 0 | 1.4  | 0.001 | -10.45121111 | Down | 4.32E-16 | 7.81E-16 |
| novel_pirl760 | 41 | 0 | 1.4  | 0.001 | -10.45121111 | Down | 4.32E-16 | 7.81E-16 |
| novel_pirl069 | 41 | 0 | 1.4  | 0.001 | -10.45121111 | Down | 4.32E-16 | 7.80E-16 |
| novel_pirl280 | 41 | 0 | 1.4  | 0.001 | -10.45121111 | Down | 4.32E-16 | 7.79E-16 |
| novel_pir813  | 40 | 0 | 1.36 | 0.001 | -10.40939094 | Down | 1.02E-15 | 1.84E-15 |
| novel_pir2132 | 40 | 0 | 1.36 | 0.001 | -10.40939094 | Down | 1.02E-15 | 1.84E-15 |
| novel_pir923  | 40 | 0 | 1.36 | 0.001 | -10.40939094 | Down | 1.02E-15 | 1.83E-15 |
| novel_pirl613 | 40 | 0 | 1.36 | 0.001 | -10.40939094 | Down | 1.02E-15 | 1.83E-15 |
| novel_pirl672 | 40 | 0 | 1.36 | 0.001 | -10.40939094 | Down | 1.02E-15 | 1.83E-15 |
| novel_pir62   | 39 | 0 | 1.33 | 0.001 | -10.37721053 | Down | 2.41E-15 | 4.31E-15 |
| novel_pir2322 | 39 | 0 | 1.33 | 0.001 | -10.37721053 | Down | 2.41E-15 | 4.31E-15 |
| novel_pirl724 | 39 | 0 | 1.33 | 0.001 | -10.37721053 | Down | 2.41E-15 | 4.30E-15 |

|               |    |   |      |       |              |      |          |          |
|---------------|----|---|------|-------|--------------|------|----------|----------|
| novel_pir61   | 39 | 0 | 1.33 | 0.001 | -10.37721053 | Down | 2.41E-15 | 4.30E-15 |
| novel_pir2221 | 39 | 0 | 1.33 | 0.001 | -10.37721053 | Down | 2.41E-15 | 4.30E-15 |
| novel_pir848  | 38 | 0 | 1.29 | 0.001 | -10.33315535 | Down | 5.68E-15 | 1.01E-14 |
| novel_pir2115 | 38 | 0 | 1.29 | 0.001 | -10.33315535 | Down | 5.68E-15 | 1.01E-14 |
| novel_pir829  | 37 | 0 | 1.26 | 0.001 | -10.29920802 | Down | 1.34E-14 | 2.38E-14 |
| novel_pir1988 | 37 | 0 | 1.26 | 0.001 | -10.29920802 | Down | 1.34E-14 | 2.38E-14 |
| novel_pir1253 | 36 | 0 | 1.23 | 0.001 | -10.2644426  | Down | 3.16E-14 | 5.60E-14 |
| novel_pir993  | 36 | 0 | 1.23 | 0.001 | -10.2644426  | Down | 3.16E-14 | 5.59E-14 |
| novel_pir2317 | 36 | 0 | 1.23 | 0.001 | -10.2644426  | Down | 3.16E-14 | 5.59E-14 |
| novel_pir1600 | 36 | 0 | 1.23 | 0.001 | -10.2644426  | Down | 3.16E-14 | 5.58E-14 |
| novel_pir252  | 35 | 0 | 1.19 | 0.001 | -10.21674586 | Down | 7.47E-14 | 1.32E-13 |
| novel_pir309  | 34 | 0 | 1.16 | 0.001 | -10.17990909 | Down | 1.76E-13 | 3.10E-13 |
| novel_pir1652 | 34 | 0 | 1.16 | 0.001 | -10.17990909 | Down | 1.76E-13 | 3.09E-13 |
| novel_pir1819 | 34 | 0 | 1.16 | 0.001 | -10.17990909 | Down | 1.76E-13 | 3.09E-13 |
| novel_pir1082 | 33 | 0 | 1.12 | 0.001 | -10.12928302 | Down | 4.16E-13 | 7.27E-13 |
| novel_pir1298 | 33 | 0 | 1.12 | 0.001 | -10.12928302 | Down | 4.16E-13 | 7.26E-13 |
| novel_pir529  | 33 | 0 | 1.12 | 0.001 | -10.12928302 | Down | 4.16E-13 | 7.25E-13 |
| novel_pir934  | 33 | 0 | 1.12 | 0.001 | -10.12928302 | Down | 4.16E-13 | 7.25E-13 |
| novel_pir1512 | 32 | 0 | 1.09 | 0.001 | -10.09011242 | Down | 9.82E-13 | 1.70E-12 |
| novel_pir893  | 32 | 0 | 1.09 | 0.001 | -10.09011242 | Down | 9.82E-13 | 1.70E-12 |
| novel_pir414  | 31 | 0 | 1.06 | 0.001 | -10.04984855 | Down | 2.32E-12 | 4.01E-12 |
| novel_pir331  | 30 | 0 | 1.02 | 0.001 | -9.994353437 | Down | 5.47E-12 | 9.46E-12 |
| novel_pir1742 | 30 | 0 | 1.02 | 0.001 | -9.994353437 | Down | 5.47E-12 | 9.45E-12 |
| novel_pir1330 | 29 | 0 | 0.99 | 0.001 | -9.951284715 | Down | 1.29E-11 | 2.22E-11 |
| novel_pir2359 | 29 | 0 | 0.99 | 0.001 | -9.951284715 | Down | 1.29E-11 | 2.22E-11 |
| novel_pir2016 | 28 | 0 | 0.95 | 0.001 | -9.891783703 | Down | 3.05E-11 | 5.22E-11 |
| novel_pir976  | 28 | 0 | 0.95 | 0.001 | -9.891783703 | Down | 3.05E-11 | 5.21E-11 |
| novel_pir602  | 28 | 0 | 0.95 | 0.001 | -9.891783703 | Down | 3.05E-11 | 5.21E-11 |
| novel_pir256  | 28 | 0 | 0.95 | 0.001 | -9.891783703 | Down | 3.05E-11 | 5.20E-11 |
| novel_pir650  | 27 | 0 | 0.92 | 0.001 | -9.845490051 | Down | 7.20E-11 | 1.22E-10 |
| novel_pir272  | 27 | 0 | 0.92 | 0.001 | -9.845490051 | Down | 7.20E-11 | 1.22E-10 |
| novel_pir1891 | 27 | 0 | 0.92 | 0.001 | -9.845490051 | Down | 7.20E-11 | 1.22E-10 |
| novel_pir1249 | 27 | 0 | 0.92 | 0.001 | -9.845490051 | Down | 7.20E-11 | 1.22E-10 |
| novel_pir623  | 26 | 0 | 0.89 | 0.001 | -9.797661526 | Down | 1.70E-10 | 2.87E-10 |
| novel_pir626  | 26 | 0 | 0.89 | 0.001 | -9.797661526 | Down | 1.70E-10 | 2.86E-10 |
| novel_pir857  | 26 | 0 | 0.89 | 0.001 | -9.797661526 | Down | 1.70E-10 | 2.86E-10 |

|               |    |   |      |       |              |      |          |          |
|---------------|----|---|------|-------|--------------|------|----------|----------|
| novel_pirl849 | 26 | 0 | 0.89 | 0.001 | -9.797661526 | Down | 1.70E-10 | 2.86E-10 |
| novel_pir869  | 26 | 0 | 0.89 | 0.001 | -9.797661526 | Down | 1.70E-10 | 2.86E-10 |
| novel_pirl305 | 26 | 0 | 0.89 | 0.001 | -9.797661526 | Down | 1.70E-10 | 2.85E-10 |
| novel_pir461  | 26 | 0 | 0.89 | 0.001 | -9.797661526 | Down | 1.70E-10 | 2.85E-10 |
| novel_pirl527 | 26 | 0 | 0.89 | 0.001 | -9.797661526 | Down | 1.70E-10 | 2.85E-10 |
| novel_pirl663 | 26 | 0 | 0.89 | 0.001 | -9.797661526 | Down | 1.70E-10 | 2.84E-10 |
| novel_pir691  | 25 | 0 | 0.85 | 0.001 | -9.731319031 | Down | 4.01E-10 | 6.70E-10 |
| novel_pir2070 | 25 | 0 | 0.85 | 0.001 | -9.731319031 | Down | 4.01E-10 | 6.69E-10 |
| novel_pir383  | 25 | 0 | 0.85 | 0.001 | -9.731319031 | Down | 4.01E-10 | 6.69E-10 |
| novel_pirl188 | 25 | 0 | 0.85 | 0.001 | -9.731319031 | Down | 4.01E-10 | 6.68E-10 |
| novel_pir2073 | 24 | 0 | 0.82 | 0.001 | -9.6794801   | Down | 9.47E-10 | 1.57E-09 |
| novel_pir384  | 24 | 0 | 0.82 | 0.001 | -9.6794801   | Down | 9.47E-10 | 1.57E-09 |
| novel_pirl617 | 24 | 0 | 0.82 | 0.001 | -9.6794801   | Down | 9.47E-10 | 1.57E-09 |
| novel_pirl580 | 24 | 0 | 0.82 | 0.001 | -9.6794801   | Down | 9.47E-10 | 1.56E-09 |
| novel_pir865  | 24 | 0 | 0.82 | 0.001 | -9.6794801   | Down | 9.47E-10 | 1.56E-09 |
| novel_pirl778 | 24 | 0 | 0.82 | 0.001 | -9.6794801   | Down | 9.47E-10 | 1.56E-09 |
| novel_pir2323 | 24 | 0 | 0.82 | 0.001 | -9.6794801   | Down | 9.47E-10 | 1.56E-09 |
| novel_pir50   | 24 | 0 | 0.82 | 0.001 | -9.6794801   | Down | 9.47E-10 | 1.56E-09 |
| novel_pir259  | 23 | 0 | 0.78 | 0.001 | -9.607330314 | Down | 2.23E-09 | 3.68E-09 |
| novel_pirl250 | 23 | 0 | 0.78 | 0.001 | -9.607330314 | Down | 2.23E-09 | 3.67E-09 |
| novel_pirl905 | 23 | 0 | 0.78 | 0.001 | -9.607330314 | Down | 2.23E-09 | 3.67E-09 |
| novel_pirl244 | 22 | 0 | 0.75 | 0.001 | -9.550746785 | Down | 5.27E-09 | 8.62E-09 |
| novel_pir2394 | 22 | 0 | 0.75 | 0.001 | -9.550746785 | Down | 5.27E-09 | 8.61E-09 |
| novel_pirl746 | 22 | 0 | 0.75 | 0.001 | -9.550746785 | Down | 5.27E-09 | 8.60E-09 |
| novel_pirl820 | 22 | 0 | 0.75 | 0.001 | -9.550746785 | Down | 5.27E-09 | 8.59E-09 |
| novel_pir939  | 22 | 0 | 0.75 | 0.001 | -9.550746785 | Down | 5.27E-09 | 8.59E-09 |
| novel_pir200  | 22 | 0 | 0.75 | 0.001 | -9.550746785 | Down | 5.27E-09 | 8.58E-09 |
| novel_pir2384 | 22 | 0 | 0.75 | 0.001 | -9.550746785 | Down | 5.27E-09 | 8.57E-09 |
| novel_pirl106 | 21 | 0 | 0.72 | 0.001 | -9.491853096 | Down | 1.25E-08 | 2.02E-08 |
| novel_pir326  | 21 | 0 | 0.72 | 0.001 | -9.491853096 | Down | 1.25E-08 | 2.02E-08 |
| novel_pir320  | 21 | 0 | 0.72 | 0.001 | -9.491853096 | Down | 1.25E-08 | 2.01E-08 |
| novel_pir753  | 21 | 0 | 0.72 | 0.001 | -9.491853096 | Down | 1.25E-08 | 2.01E-08 |
| novel_pirl150 | 21 | 0 | 0.72 | 0.001 | -9.491853096 | Down | 1.25E-08 | 2.01E-08 |
| novel_pir2311 | 21 | 0 | 0.72 | 0.001 | -9.491853096 | Down | 1.25E-08 | 2.01E-08 |
| novel_pir2056 | 20 | 0 | 0.68 | 0.001 | -9.409390936 | Down | 2.94E-08 | 4.71E-08 |
| novel_pir2362 | 20 | 0 | 0.68 | 0.001 | -9.409390936 | Down | 2.94E-08 | 4.70E-08 |

|               |    |   |      |       |              |      |          |          |
|---------------|----|---|------|-------|--------------|------|----------|----------|
| novel_pir908  | 20 | 0 | 0.68 | 0.001 | -9.409390936 | Down | 2.94E-08 | 4.70E-08 |
| novel_pir714  | 19 | 0 | 0.65 | 0.001 | -9.344295908 | Down | 6.94E-08 | 1.11E-07 |
| novel_pir2339 | 19 | 0 | 0.65 | 0.001 | -9.344295908 | Down | 6.94E-08 | 1.11E-07 |
| novel_pir1003 | 19 | 0 | 0.65 | 0.001 | -9.344295908 | Down | 6.94E-08 | 1.10E-07 |
| novel_pir1757 | 19 | 0 | 0.65 | 0.001 | -9.344295908 | Down | 6.94E-08 | 1.10E-07 |
| novel_pir1134 | 19 | 0 | 0.65 | 0.001 | -9.344295908 | Down | 6.94E-08 | 1.10E-07 |
| novel_pir410  | 19 | 0 | 0.65 | 0.001 | -9.344295908 | Down | 6.94E-08 | 1.10E-07 |
| novel_pir1401 | 19 | 0 | 0.65 | 0.001 | -9.344295908 | Down | 6.94E-08 | 1.10E-07 |
| novel_pir2149 | 18 | 0 | 0.61 | 0.001 | -9.252665432 | Down | 1.64E-07 | 2.58E-07 |
| novel_pir1836 | 18 | 0 | 0.61 | 0.001 | -9.252665432 | Down | 1.64E-07 | 2.58E-07 |
| novel_pir2215 | 18 | 0 | 0.61 | 0.001 | -9.252665432 | Down | 1.64E-07 | 2.57E-07 |
| novel_pir652  | 17 | 0 | 0.58 | 0.001 | -9.17990909  | Down | 3.87E-07 | 6.06E-07 |
| novel_pir2189 | 17 | 0 | 0.58 | 0.001 | -9.17990909  | Down | 3.87E-07 | 6.05E-07 |
| novel_pir255  | 17 | 0 | 0.58 | 0.001 | -9.17990909  | Down | 3.87E-07 | 6.05E-07 |
| novel_pir1409 | 17 | 0 | 0.58 | 0.001 | -9.17990909  | Down | 3.87E-07 | 6.04E-07 |
| novel_pir1614 | 17 | 0 | 0.58 | 0.001 | -9.17990909  | Down | 3.87E-07 | 6.04E-07 |
| novel_pir302  | 17 | 0 | 0.58 | 0.001 | -9.17990909  | Down | 3.87E-07 | 6.03E-07 |
| novel_pir873  | 17 | 0 | 0.58 | 0.001 | -9.17990909  | Down | 3.87E-07 | 6.03E-07 |
| novel_pir1356 | 17 | 0 | 0.58 | 0.001 | -9.17990909  | Down | 3.87E-07 | 6.02E-07 |
| novel_pir1576 | 17 | 0 | 0.58 | 0.001 | -9.17990909  | Down | 3.87E-07 | 6.02E-07 |
| novel_pir647  | 17 | 0 | 0.58 | 0.001 | -9.17990909  | Down | 3.87E-07 | 6.01E-07 |
| novel_pir2234 | 17 | 0 | 0.58 | 0.001 | -9.17990909  | Down | 3.87E-07 | 6.01E-07 |
| novel_pir44   | 16 | 0 | 0.54 | 0.001 | -9.076815597 | Down | 9.12E-07 | 1.41E-06 |
| novel_pir454  | 16 | 0 | 0.54 | 0.001 | -9.076815597 | Down | 9.12E-07 | 1.41E-06 |
| novel_pir1743 | 16 | 0 | 0.54 | 0.001 | -9.076815597 | Down | 9.12E-07 | 1.40E-06 |
| novel_pir1176 | 16 | 0 | 0.54 | 0.001 | -9.076815597 | Down | 9.12E-07 | 1.40E-06 |
| novel_pir1054 | 16 | 0 | 0.54 | 0.001 | -9.076815597 | Down | 9.12E-07 | 1.40E-06 |
| novel_pir1685 | 16 | 0 | 0.54 | 0.001 | -9.076815597 | Down | 9.12E-07 | 1.40E-06 |
| novel_pir1756 | 16 | 0 | 0.54 | 0.001 | -9.076815597 | Down | 9.12E-07 | 1.40E-06 |
| novel_pir1779 | 16 | 0 | 0.54 | 0.001 | -9.076815597 | Down | 9.12E-07 | 1.40E-06 |
| novel_pir2064 | 16 | 0 | 0.54 | 0.001 | -9.076815597 | Down | 9.12E-07 | 1.40E-06 |
| novel_pir812  | 16 | 0 | 0.54 | 0.001 | -9.076815597 | Down | 9.12E-07 | 1.40E-06 |
| novel_pir594  | 15 | 0 | 0.51 | 0.001 | -8.994353437 | Down | 2.15E-06 | 3.24E-06 |
| novel_pir1104 | 15 | 0 | 0.51 | 0.001 | -8.994353437 | Down | 2.15E-06 | 3.24E-06 |
| novel_pir1428 | 15 | 0 | 0.51 | 0.001 | -8.994353437 | Down | 2.15E-06 | 3.23E-06 |
| novel_pir1471 | 15 | 0 | 0.51 | 0.001 | -8.994353437 | Down | 2.15E-06 | 3.23E-06 |

|               |      |    |        |       |              |      |          |          |
|---------------|------|----|--------|-------|--------------|------|----------|----------|
| novel_pir399  | 6067 | 17 | 206.61 | 0.43  | -8.908357708 | Down | 0        | 0        |
| novel_pir359  | 14   | 0  | 0.48   | 0.001 | -8.906890596 | Down | 5.08E-06 | 7.54E-06 |
| novel_pir2358 | 14   | 0  | 0.48   | 0.001 | -8.906890596 | Down | 5.08E-06 | 7.54E-06 |
| novel_pir1350 | 14   | 0  | 0.48   | 0.001 | -8.906890596 | Down | 5.08E-06 | 7.53E-06 |
| novel_pir2182 | 14   | 0  | 0.48   | 0.001 | -8.906890596 | Down | 5.08E-06 | 7.53E-06 |
| novel_pir1892 | 14   | 0  | 0.48   | 0.001 | -8.906890596 | Down | 5.08E-06 | 7.52E-06 |
| novel_pir1053 | 14   | 0  | 0.48   | 0.001 | -8.906890596 | Down | 5.08E-06 | 7.52E-06 |
| novel_pir932  | 14   | 0  | 0.48   | 0.001 | -8.906890596 | Down | 5.08E-06 | 7.51E-06 |
| novel_pir1914 | 3286 | 10 | 111.91 | 0.25  | -8.806195147 | Down | 0        | 0        |
| novel_pir103  | 13   | 0  | 0.44   | 0.001 | -8.781359714 | Down | 1.20E-05 | 1.75E-05 |
| novel_pir1547 | 13   | 0  | 0.44   | 0.001 | -8.781359714 | Down | 1.20E-05 | 1.75E-05 |
| novel_pir1318 | 13   | 0  | 0.44   | 0.001 | -8.781359714 | Down | 1.20E-05 | 1.75E-05 |
| novel_pir761  | 13   | 0  | 0.44   | 0.001 | -8.781359714 | Down | 1.20E-05 | 1.75E-05 |
| novel_pir2457 | 13   | 0  | 0.44   | 0.001 | -8.781359714 | Down | 1.20E-05 | 1.75E-05 |
| novel_pir1026 | 13   | 0  | 0.44   | 0.001 | -8.781359714 | Down | 1.20E-05 | 1.74E-05 |
| novel_pir2020 | 13   | 0  | 0.44   | 0.001 | -8.781359714 | Down | 1.20E-05 | 1.74E-05 |
| novel_pir210  | 13   | 0  | 0.44   | 0.001 | -8.781359714 | Down | 1.20E-05 | 1.74E-05 |
| novel_pir2463 | 13   | 0  | 0.44   | 0.001 | -8.781359714 | Down | 1.20E-05 | 1.74E-05 |
| novel_pir1424 | 12   | 0  | 0.41   | 0.001 | -8.6794801   | Down | 2.83E-05 | 4.07E-05 |
| novel_pir1221 | 12   | 0  | 0.41   | 0.001 | -8.6794801   | Down | 2.83E-05 | 4.06E-05 |
| novel_pir1504 | 12   | 0  | 0.41   | 0.001 | -8.6794801   | Down | 2.83E-05 | 4.06E-05 |
| novel_pir234  | 12   | 0  | 0.41   | 0.001 | -8.6794801   | Down | 2.83E-05 | 4.06E-05 |
| novel_pir1064 | 12   | 0  | 0.41   | 0.001 | -8.6794801   | Down | 2.83E-05 | 4.05E-05 |
| novel_pir409  | 12   | 0  | 0.41   | 0.001 | -8.6794801   | Down | 2.83E-05 | 4.05E-05 |
| novel_pir922  | 12   | 0  | 0.41   | 0.001 | -8.6794801   | Down | 2.83E-05 | 4.05E-05 |
| novel_pir905  | 12   | 0  | 0.41   | 0.001 | -8.6794801   | Down | 2.83E-05 | 4.04E-05 |
| novel_pir1186 | 12   | 0  | 0.41   | 0.001 | -8.6794801   | Down | 2.83E-05 | 4.04E-05 |
| novel_pir636  | 11   | 0  | 0.37   | 0.001 | -8.531381461 | Down | 6.69E-05 | 9.28E-05 |
| novel_pir27   | 11   | 0  | 0.37   | 0.001 | -8.531381461 | Down | 6.69E-05 | 9.27E-05 |
| novel_pir1762 | 11   | 0  | 0.37   | 0.001 | -8.531381461 | Down | 6.69E-05 | 9.26E-05 |
| novel_pir2460 | 11   | 0  | 0.37   | 0.001 | -8.531381461 | Down | 6.69E-05 | 9.26E-05 |
| novel_pir1542 | 11   | 0  | 0.37   | 0.001 | -8.531381461 | Down | 6.69E-05 | 9.25E-05 |
| novel_pir1230 | 11   | 0  | 0.37   | 0.001 | -8.531381461 | Down | 6.69E-05 | 9.24E-05 |
| novel_pir1275 | 11   | 0  | 0.37   | 0.001 | -8.531381461 | Down | 6.69E-05 | 9.24E-05 |
| novel_pir70   | 11   | 0  | 0.37   | 0.001 | -8.531381461 | Down | 6.69E-05 | 9.23E-05 |
| novel_pir715  | 11   | 0  | 0.37   | 0.001 | -8.531381461 | Down | 6.69E-05 | 9.22E-05 |

|                |      |    |        |       |              |      |             |             |
|----------------|------|----|--------|-------|--------------|------|-------------|-------------|
| novel_pir2138  | 11   | 0  | 0.37   | 0.001 | -8.531381461 | Down | 6.69E-05    | 9.22E-05    |
| novel_pir231   | 3004 | 12 | 102.3  | 0.3   | -8.413627929 | Down | 0           | 0           |
| novel_pir1812  | 10   | 0  | 0.34   | 0.001 | -8.409390936 | Down | 0.000157801 | 0.000215517 |
| novel_pir914   | 10   | 0  | 0.34   | 0.001 | -8.409390936 | Down | 0.000157801 | 0.00021536  |
| novel_pir2123  | 10   | 0  | 0.34   | 0.001 | -8.409390936 | Down | 0.000157801 | 0.000215204 |
| novel_pir1801  | 10   | 0  | 0.34   | 0.001 | -8.409390936 | Down | 0.000157801 | 0.000215048 |
| novel_pir2191  | 10   | 0  | 0.34   | 0.001 | -8.409390936 | Down | 0.000157801 | 0.000214893 |
| novel_pir99    | 10   | 0  | 0.34   | 0.001 | -8.409390936 | Down | 0.000157801 | 0.000214737 |
| novel_pir1831  | 10   | 0  | 0.34   | 0.001 | -8.409390936 | Down | 0.000157801 | 0.000214582 |
| novel_pir1170  | 10   | 0  | 0.34   | 0.001 | -8.409390936 | Down | 0.000157801 | 0.000214427 |
| novel_pir1954  | 10   | 0  | 0.34   | 0.001 | -8.409390936 | Down | 0.000157801 | 0.000214273 |
| novel_pir1136  | 10   | 0  | 0.34   | 0.001 | -8.409390936 | Down | 0.000157801 | 0.000214118 |
| novel_pir2251  | 10   | 0  | 0.34   | 0.001 | -8.409390936 | Down | 0.000157801 | 0.000213964 |
| novel_pir2140  | 10   | 0  | 0.34   | 0.001 | -8.409390936 | Down | 0.000157801 | 0.00021381  |
| novel_pir1022  | 10   | 0  | 0.34   | 0.001 | -8.409390936 | Down | 0.000157801 | 0.000213656 |
| mmu_pir_000705 | 9    | 0  | 0.31   | 0.001 | -8.276124405 | Down | 0.00037248  | 0.000481131 |
| mmu_pir_023189 | 3681 | 39 | 125.36 | 0.98  | -6.99907962  | Down | 0           | 0           |
| mmu_pir_010309 | 1894 | 23 | 64.5   | 0.58  | -6.79710245  | Down | 0           | 0           |
| novel_pir273   | 745  | 12 | 25.37  | 0.3   | -6.402017208 | Down | 1.05E-255   | 5.47E-254   |
| mmu_pir_022820 | 355  | 6  | 12.09  | 0.15  | -6.332707934 | Down | 3.65E-122   | 2.34E-121   |
| novel_pir807   | 1826 | 31 | 62.18  | 0.78  | -6.316832682 | Down | 0           | 0           |
| novel_pir2385  | 735  | 15 | 25.03  | 0.38  | -6.041515062 | Down | 1.42E-247   | 6.52E-246   |
| novel_pir229   | 857  | 20 | 29.19  | 0.5   | -5.867402306 | Down | 7.65E-285   | 4.64E-283   |
| novel_pir710   | 352  | 10 | 11.99  | 0.25  | -5.583759754 | Down | 1.72E-115   | 9.87E-115   |
| novel_pir230   | 1224 | 35 | 41.68  | 0.88  | -5.565707944 | Down | 0           | 0           |
| novel_pir1272  | 2888 | 88 | 98.35  | 2.2   | -5.482349624 | Down | 0           | 0           |
| novel_pir2411  | 387  | 12 | 13.18  | 0.3   | -5.457244059 | Down | 1.55E-125   | 1.06E-124   |
| novel_pir1720  | 949  | 34 | 32.32  | 0.85  | -5.248820547 | Down | 7.48E-300   | 5.03E-298   |
| novel_pir711   | 617  | 25 | 21.01  | 0.63  | -5.059580523 | Down | 4.28E-192   | 1.26E-190   |
| novel_pir278   | 370  | 15 | 12.6   | 0.38  | -5.051280505 | Down | 8.07E-116   | 4.64E-115   |
| novel_pir806   | 1617 | 74 | 55.07  | 1.85  | -4.895669433 | Down | 0           | 0           |
| novel_pir1655  | 462  | 21 | 15.73  | 0.53  | -4.891382501 | Down | 1.19E-141   | 1.23E-140   |
| novel_pir1609  | 333  | 16 | 11.34  | 0.4   | -4.82527683  | Down | 1.38E-101   | 6.07E-101   |
| novel_pir131   | 786  | 40 | 26.77  | 1     | -4.742545234 | Down | 3.73E-235   | 1.56E-233   |
| novel_pir1440  | 309  | 16 | 10.52  | 0.4   | -4.716990894 | Down | 3.88E-93    | 1.48E-92    |
| novel_pir945   | 377  | 21 | 12.84  | 0.53  | -4.598509033 | Down | 9.59E-112   | 5.03E-111   |



|                |       |      |         |        |              |      |           |           |
|----------------|-------|------|---------|--------|--------------|------|-----------|-----------|
| novel pir557   | 284   | 16   | 9.67    | 0.4    | -4.595443985 | Down | 2.23E-84  | 7.55E-84  |
| mmu piR 002962 | 388   | 24   | 13.21   | 0.6    | -4.460524156 | Down | 1.51E-112 | 8.02E-112 |
| novel pir571   | 386   | 25   | 13.15   | 0.63   | -4.383567161 | Down | 7.08E-111 | 3.68E-110 |
| novel pirl601  | 569   | 38   | 19.38   | 0.95   | -4.350497247 | Down | 1.51E-161 | 2.52E-160 |
| novel pir57    | 179   | 12   | 6.1     | 0.3    | -4.345774837 | Down | 7.57E-52  | 1.87E-51  |
| novel pir277   | 357   | 26   | 12.16   | 0.65   | -4.2255597   | Down | 6.06E-100 | 2.58E-99  |
| novel pirl627  | 354   | 26   | 12.06   | 0.65   | -4.213646379 | Down | 6.45E-99  | 2.73E-98  |
| novel pir398   | 2111  | 160  | 71.89   | 4.01   | -4.164116962 | Down | 0         | 0         |
| novel pir984   | 3461  | 331  | 117.87  | 8.29   | -3.829680662 | Down | 0         | 0         |
| novel pir397   | 114   | 11   | 3.88    | 0.28   | -3.79255792  | Down | 1.30E-30  | 2.72E-30  |
| novel pirl30   | 837   | 84   | 28.5    | 2.1    | -3.762500686 | Down | 3.07E-212 | 1.01E-210 |
| novel pir296   | 569   | 60   | 19.38   | 1.5    | -3.691534165 | Down | 1.42E-142 | 1.52E-141 |
| novel pir2122  | 3899  | 418  | 132.78  | 10.46  | -3.6660831   | Down | 0         | 0         |
| novel pir2035  | 149   | 18   | 5.07    | 0.45   | -3.493988841 | Down | 8.38E-37  | 1.83E-36  |
| novel pir561   | 189   | 23   | 6.44    | 0.58   | -3.472935883 | Down | 3.75E-46  | 8.80E-46  |
| novel pirl32   | 358   | 47   | 12.19   | 1.18   | -3.368839361 | Down | 1.50E-83  | 5.02E-83  |
| novel pir290   | 88    | 12   | 3       | 0.3    | -3.321928095 | Down | 2.26E-21  | 4.37E-21  |
| novel pir312   | 158   | 22   | 5.38    | 0.55   | -3.290102649 | Down | 6.56E-37  | 1.44E-36  |
| mmu piR 031448 | 65076 | 9736 | 2216.18 | 243.72 | -3.184778512 | Down | 0         | 0         |
| novel pirl55   | 1175  | 185  | 40.01   | 4.63   | -3.11127653  | Down | 7.87E-250 | 3.80E-248 |
| novel pirl696  | 572   | 92   | 19.48   | 2.3    | -3.082287911 | Down | 2.24E-121 | 1.40E-120 |
| novel pir928   | 124   | 20   | 4.22    | 0.5    | -3.077242999 | Down | 1.54E-27  | 3.16E-27  |
| novel pir717   | 2955  | 477  | 100.63  | 11.94  | -3.075185726 | Down | 0         | 0         |
| novel pirl33   | 1144  | 191  | 38.96   | 4.78   | -3.026911154 | Down | 1.36E-236 | 5.82E-235 |
| mmu piR 013763 | 303   | 53   | 10.32   | 1.33   | -2.95594482  | Down | 1.52E-62  | 4.09E-62  |
| mmu piR 028252 | 323   | 57   | 11      | 1.43   | -2.943416472 | Down | 2.88E-66  | 7.99E-66  |
| novel pirl618  | 214   | 39   | 7.29    | 0.98   | -2.89506516  | Down | 9.52E-44  | 2.19E-43  |
| mmu piR 017405 | 802   | 156  | 27.31   | 3.91   | -2.804188801 | Down | 1.03E-153 | 1.45E-152 |
| novel pirl164  | 69    | 14   | 2.35    | 0.35   | -2.74723393  | Down | 2.57E-14  | 4.55E-14  |
| mmu piR 000634 | 52    | 11   | 1.77    | 0.28   | -2.660250628 | Down | 6.92E-11  | 1.18E-10  |
| mmu piR 025576 | 7161  | 1563 | 243.87  | 39.13  | -2.639765279 | Down | 0         | 0         |
| mmu piR 032974 | 33    | 7    | 1.12    | 0.18   | -2.637429921 | Down | 2.31E-07  | 3.62E-07  |
| novel pir244   | 72    | 16   | 2.45    | 0.4    | -2.614709844 | Down | 3.67E-14  | 6.46E-14  |
| novel pir2416  | 697   | 158  | 23.74   | 3.96   | -2.5837476   | Down | 3.66E-122 | 2.34E-121 |
| novel pir354   | 192   | 44   | 6.54    | 1.1    | -2.571787112 | Down | 1.19E-34  | 2.56E-34  |
| mmu piR 018323 | 265   | 65   | 9.02    | 1.63   | -2.468255469 | Down | 3.64E-45  | 8.47E-45  |

|                |      |     |       |       |              |      |           |           |
|----------------|------|-----|-------|-------|--------------|------|-----------|-----------|
| novel_pir719   | 565  | 149 | 19.24 | 3.73  | -2.366861264 | Down | 1.31E-89  | 4.80E-89  |
| novel_pir2422  | 313  | 84  | 10.66 | 2.1   | -2.343746205 | Down | 8.73E-50  | 2.11E-49  |
| novel_pir2468  | 459  | 126 | 15.63 | 3.15  | -2.310894045 | Down | 5.54E-71  | 1.62E-70  |
| novel_pir2033  | 879  | 243 | 29.93 | 6.08  | -2.29944905  | Down | 1.59E-133 | 1.36E-132 |
| novel_pir789   | 375  | 104 | 12.77 | 2.6   | -2.296174997 | Down | 7.31E-58  | 1.90E-57  |
| novel_pir1591  | 446  | 130 | 15.19 | 3.25  | -2.224610247 | Down | 7.31E-66  | 2.02E-65  |
| novel_pir2423  | 397  | 118 | 13.52 | 2.95  | -2.196308292 | Down | 6.76E-58  | 1.76E-57  |
| novel_pir608   | 295  | 100 | 10.05 | 2.5   | -2.007195501 | Down | 8.62E-39  | 1.91E-38  |
| novel_pir1667  | 149  | 52  | 5.07  | 1.3   | -1.963474124 | Down | 7.50E-20  | 1.42E-19  |
| novel_pir115   | 401  | 162 | 13.66 | 4.06  | -1.750405851 | Down | 1.55E-43  | 3.56E-43  |
| novel_pir684   | 45   | 21  | 1.53  | 0.53  | -1.529467388 | Down | 2.50E-05  | 3.59E-05  |
| mmu_pir_020120 | 633  | 304 | 21.56 | 7.61  | -1.502388819 | Down | 2.05E-54  | 5.21E-54  |
| novel_pir147   | 636  | 314 | 21.66 | 7.86  | -1.462432025 | Down | 1.48E-52  | 3.69E-52  |
| novel_pir145   | 1029 | 519 | 35.04 | 12.99 | -1.431601344 | Down | 2.77E-81  | 8.89E-81  |
| novel_pir149   | 370  | 192 | 12.6  | 4.81  | -1.389314935 | Down | 4.29E-29  | 8.88E-29  |
| novel_pir2425  | 347  | 183 | 11.82 | 4.58  | -1.367810532 | Down | 1.01E-26  | 2.04E-26  |
| novel_pir2420  | 453  | 243 | 15.43 | 6.08  | -1.343594833 | Down | 1.79E-33  | 3.82E-33  |
| novel_pir275   | 73   | 41  | 2.49  | 1.03  | -1.273501405 | Down | 3.36E-06  | 5.04E-06  |
| novel_pir718   | 781  | 469 | 26.6  | 11.74 | -1.179993837 | Down | 2.52E-46  | 5.96E-46  |
| novel_pir562   | 76   | 48  | 2.59  | 1.2   | -1.109917692 | Down | 2.32E-05  | 3.33E-05  |
